# Supplementary material for: Differences in pathways contributing to thyroid hormone effects on postnatal cartilage calcification versus secondary ossification center development
Source: eLife. 2022 Jan 31;11:e76730. doi: 10.7554/eLife.76730 (PMC8830887; doi:10.7554/eLife.76730)
Supplement: Figure 3—source data 1. — Reverse transcriptase quantitative polymerase chain reaction (RT-qPCR) data for day 10 Tshr femur head (FH) and distal femur (DF). Average fold changes plotted and t-test values are highlighted in yellow. [file elife-76730-fig3-data1.xlsx]

## Sheet: Shh
Source Data for Figure 3A-3D
								PPIA	2015-01-21	SP
								SHH	2015-01-21	SP
10d Femur Head RNA
Tshr+/- NaOH	SHH	PPIA	∆Ct	Tshr-/- NaOH	SHH	PPIA	∆Ct	∆∆Ct	Fold ∆
1	29.1533	15.643	13.5102	1
2	27.7329	16.2212	11.5116	2	26.9657	15.6593	11.3064	-1.34847	2.54642
3	28.5725	15.8063	12.7663	3	26.8261	16.4132	10.4129	-2.24195	4.73036			PPIA	SHH
4	28.4625	16.2288	12.2337	4	27.6212	16.2913	11.3299	-1.32493	2.50521		Blank	21.9533	28.9655
5	28.9709	15.5344	13.4365	5	26.6272	15.8885	10.7388	-1.91609	3.77399		Blank	22.3755	30.2416
6	28.6602	16.1893	12.4708	6	26.7224	15.6534	11.0689	-1.58592	3.00199
Average	28.592	15.9372	12.6549	Average	26.9525	15.9811	10.9714	-1.68347	3.31159
Median	28.6163	15.9978	12.6185	Median	26.8261	15.8885	11.0689	-1.58592	3.00199
SD	0.493659	0.3147	0.758054	SD	0.394365	0.354408	0.392525	0.392525	0.943174
SEM			0.268012				0.138779		0.4218
	P value
SHH	0.000205707
PPIA	0.832274
Ct	0.00156623
Relative Fold	1.66654
Fold Incr	3.212
Tshr+/- NaOH	SHH	PPIA	∆Ct	Tshr-/- TH	SHH	PPIA	∆Ct	∆∆Ct	Fold ∆
1	29.1533	15.643	13.5102	1
2	27.7329	16.2212	11.5116	2	27.5001	15.4561	12.0439	-0.61093	1.52724
3	28.5725	15.8063	12.7663	3	28.3402	15.4107	12.9294	0.27456	0.826702
4	28.4625	16.2288	12.2337	4	28.4389	15.5384	12.9005	0.24568	0.843418
5	28.9709	15.5344	13.4365	5	27.4968	15.2593	12.2375	-0.41737	1.33549
6	28.6602	16.1893	12.4708	6	28.2667	16.898	11.3687	-1.28615	2.43876
Average	28.592	15.9372	12.6549	Average	28.0085	15.7125	12.296	-0.358842	1.39432
Median	28.6163	15.9978	12.6185	Median	28.2667	15.4561	12.2375	-0.41737	1.33549
SD	0.493659	0.3147	0.758054	SD	0.469641	0.670428	0.650676	0.650676	0.659104
SEM			0.268012				0.230049		0.29476
	P value
SHH	0.0772388
PPIA	0.481075
Ct	0.426972
Relative Fold	0.0851673
Fold Incr	1.2824
Tshr-/- NaOH	SHH	PPIA	∆Ct	Tshr-/- TH	SHH	PPIA	∆Ct	∆∆Ct	Fold ∆
1				1
2	26.9657	15.6593	11.3064	2	27.5001	15.4561	12.0439	1.07254	0.47548
3	26.8261	16.4132	10.4129	3	28.3402	15.4107	12.9294	1.95803	0.257379
4	27.6212	16.2913	11.3299	4	28.4389	15.5384	12.9005	1.92915	0.262583
5	26.6272	15.8885	10.7388	5	27.4968	15.2593	12.2375	1.2661	0.415782
6	26.7224	15.6534	11.0689	6	28.2667	16.898	11.3687	0.397322	0.759266
Average	26.9525	15.9811	10.9714	Average	28.0085	15.7125	12.296	1.32463	0.434098
Median	26.8261	15.8885	11.0689	Median	28.2667	15.4561	12.2375	1.2661	0.415782
SD	0.394365	0.354408	0.392525	SD	0.469641	0.670428	0.650676	0.650676	0.205201
SEM			0.138779				0.230049		0.0917685
	P value
SHH	0.00487389
PPIA	0.451212
Ct	0.00455874
Relative Fold	3.90184
Fold Incr	0.399252
10D SOC RNA
Tshr+/- NaOH	SHH	PPIA	∆Ct	Tshr-/- NaOH	SHH	PPIA	∆Ct	∆∆Ct	Fold ∆
1				1	28.4556	15.9526	12.5029	-0.155132	1.11352
2				2	27.0821	15.9073	11.1748	-1.48325	2.79578
3	26.7835	15.7971	10.9865	3	28.4776	16.5529	11.9247	-0.73332	1.66246
4	29.2796	15.8616	13.418	4	27.1059	15.9575	11.1484	-1.5097	2.84751			PPIA	SHH
5	29.2163	15.6583	13.558	5	28.2499	16.2989	11.951	-0.70704	1.63245		Blank	14.4745	23.4812
6	28.4377	15.7679	12.6697	6	27.8185	15.7494	12.0691	-0.588983	1.50419		Blank	23.0087	Undetermined
Average	28.4293	15.7712	12.6581	Average	27.8649	16.0698	11.7952	-0.862904	1.92598
Median	28.827	15.7825	13.0439	Median	28.0342	15.9551	11.9379	-0.72018	1.64746
SD	1.16204	0.0848256	1.18063	SD	0.642428	0.297068	0.532961	0.532961	0.721022
SEM			0.590315				0.21758		0.294356
	P value
SHH	0.346571
PPIA	0.0907128
Ct	0.148818
Relative Fold	0.108863
Fold Incr	1.8187
Tshr+/- NaOH	SHH	PPIA	∆Ct	Tshr-/- TH	SHH	PPIA	∆Ct	∆∆Ct	Fold ∆
1				1	26.5742	16.3816	10.1926	-2.46546	5.52301
2				2	26.6151	16.3476	10.2675	-2.39052	5.24347
3	26.7835	15.7971	10.9865	3
4	29.2796	15.8616	13.418	4	26.2316	16.7764	9.45526	-3.20279	9.20739
5	29.2163	15.6583	13.558	5
6	28.4377	15.7679	12.6697	6	27.6244	16.2963	11.3281	-1.32995	2.51394
Average	28.4293	15.7712	12.6581	Average	26.7613	16.4505	10.3109	-2.34718	5.62195
Median	28.827	15.7825	13.0439	Median	26.5947	16.3646	10.2301	-2.42799	5.38324
SD	1.16204	0.0848256	1.18063	SD	0.600505	0.220077	0.770866	0.770866	2.74883
SEM			0.590315				0.385433		1.37441
	P value
SHH	0.0434725
PPIA	0.00119394
Ct	0.0158202
Relative Fold	2.48476
Fold Incr	5.08828
Tshr-/- NaOH	SHH	PPIA	∆Ct	Tshr-/- TH	SHH	PPIA	∆Ct	∆∆Ct	Fold ∆
1	28.4556	15.9526	12.5029	1	26.5742	16.3816	10.1926	-1.60255	3.0368
2	27.0821	15.9073	11.1748	2	26.6151	16.3476	10.2675	-1.52762	2.88309
3	28.4776	16.5529	11.9247	3
4	27.1059	15.9575	11.1484	4	26.2316	16.7764	9.45526	-2.33989	5.06263
5	28.2499	16.2989	11.951	5
6	27.8185	15.7494	12.0691	6	27.6244	16.2963	11.3281	-0.467044	1.38227
Average	27.8649	16.0698	11.7952	Average	26.7613	16.4505	10.3109	-1.48428	3.0912
Median	28.0342	15.9551	11.9379	Median	26.5947	16.3646	10.2301	-1.56508	2.95995
SD	0.642428	0.297068	0.532961	SD	0.600505	0.220077	0.770866	0.770866	1.51143
SEM			0.21758				0.385433		0.755714
	P value
SHH	0.0259827
PPIA	0.0610465
Ct	0.00664596
Relative Fold	0.508953
Fold Incr	2.79777

## Sheet: Ihh(new)
Source Data for Figure 3A-3D
								PPIA	2015-01-21	SP
								IHH	2015-01-21	SP
10d Femur Head RNA
Tshr+/- NaOH	IHH	PPIA	∆Ct	Tshr-/- NaOH	IHH	PPIA	∆Ct	∆∆Ct	Fold ∆
1	23.4385	15.643	7.79551	1	24.714	15.8842	8.82979	0.75414	0.5929
2				2	24.4038	15.6593	8.74452	0.66887	0.628999
3	23.9913	15.8063	8.185	3
4	24.5917	16.2288	8.36291	4	24.8073	16.2913	8.51605	0.4404	0.73693			PPIA	IHH
5	23.8461	15.5344	8.31177	5	24.4758	15.8885	8.58738	0.51173	0.701381		Blank	21.9533	Undetermined
6	23.9124	16.1893	7.72306	6	24.467	15.6534	8.81358	0.73793	0.599599		Blank	22.3755	Undetermined
Average	23.956	15.8803	8.07565	Average	24.5736	15.8753	8.69826	0.622614	0.651962
Median	23.9124	15.8063	8.185	Median	24.4758	15.8842	8.74452	0.66887	0.628999
SD	0.414439	0.315576	0.29708	SD	0.176145	0.259417	0.139851	0.139851	0.064069
SEM			0.105034				0.0494449		0.0286525
	P value
IHH	0.0154249
PPIA	0.978769
Ct	0.00283754
Relative Fold	0.581354
Fold Incr	0.649493
Tshr+/- NaOH	IHH	PPIA	∆Ct	Tshr-/- TH	IHH	PPIA	∆Ct	∆∆Ct	Fold ∆
1	23.4385	15.643	7.79551	1
2				2	23.8579	15.4561	8.40182	0.32617	0.797651
3	23.9913	15.8063	8.185	3	22.9925	15.4107	7.58178	-0.49387	1.40822
4	24.5917	16.2288	8.36291	4	23.5391	15.5384	8.0007	-0.07495	1.05332
5	23.8461	15.5344	8.31177	5	23.9032	15.2593	8.64389	0.56824	0.674439
6	23.9124	16.1893	7.72306	6
Average	23.956	15.8803	8.07565	Average	23.5732	15.4161	8.15705	0.0813975	0.983408
Median	23.9124	15.8063	8.185	Median	23.6985	15.4334	8.20126	0.12561	0.925488
SD	0.414439	0.315576	0.29708	SD	0.419674	0.117127	0.4663	0.4663	0.324201
SEM			0.105034				0.164862		0.1621
	P value
IHH	0.213163
PPIA	0.02803
Ct	0.758175
Relative Fold	0.299972
Fold Incr	0.945142
Tshr-/- NaOH	IHH	PPIA	∆Ct	Tshr-/- TH	IHH	PPIA	∆Ct	∆∆Ct	Fold ∆
1	24.714	15.8842	8.82979	1
2	24.4038	15.6593	8.74452	2	23.8579	15.4561	8.40182	-0.296444	1.22811
3				3	22.9925	15.4107	7.58178	-1.11648	2.16818
4	24.8073	16.2913	8.51605	4	23.5391	15.5384	8.0007	-0.697564	1.62176
5	24.4758	15.8885	8.58738	5	23.9032	15.2593	8.64389	-0.054374	1.03841
6	24.467	15.6534	8.81358	6
Average	24.5736	15.8753	8.69826	Average	23.5732	15.4161	8.15705	-0.541216	1.51412
Median	24.4758	15.8842	8.74452	Median	23.6985	15.4334	8.20126	-0.497004	1.42494
SD	0.176145	0.259417	0.139851	SD	0.419674	0.117127	0.4663	0.4663	0.49916
SEM			0.0494449				0.164862		0.24958
	P value
IHH	0.00178417
PPIA	0.0140391
Ct	0.0411472
Relative Fold	0.00561252
Fold Incr	1.4552
10D SOC RNA
Tshr+/- NaOH	IHH	PPIA	∆Ct	Tshr-/- NaOH	IHH	PPIA	∆Ct	∆∆Ct	Fold ∆
1				1	21.9891	15.9526	6.03645	0.227555	0.854081
2				2	21.8268	15.9073	5.91948	0.110583	0.926214
3	21.77	15.7971	5.9729	3	22.8777	16.5529	6.3248	0.515909	0.699352
4	21.5675	15.8616	5.70594	4	22.4585	15.9575	6.50094	0.692051	0.618973
5	21.3264	15.6583	5.66804	5	22.5653	16.2989	6.26643	0.457541	0.728227
6	21.6566	15.7679	5.8887	6	21.8522	15.7494	6.10283	0.293942	0.81567			PPIA	IHH
Average	21.5801	15.7712	5.80889	Average	22.2616	16.0698	6.19182	0.38293	0.773753		Blank	14.4745	28.4912
Median	21.6121	15.7825	5.79732	Median	22.2238	15.9551	6.18463	0.375741	0.771948		Uni	23.0087	Undetermined
SD	0.188353	0.0848256	0.145725	SD	0.433936	0.297068	0.212151	0.212151	0.112267
SEM			0.0728623				0.0866102		0.0458327
	P value
IHH	0.0193804
PPIA	0.0907128
Ct	0.0141736
Relative Fold	0.354121
Fold Incr	0.766878
Tshr+/- NaOH	IHH	PPIA	∆Ct	Tshr-/- TH	IHH	PPIA	∆Ct	∆∆Ct	Fold ∆
1				1	20.9251	16.3816	4.5435	-1.26539	2.40392
2				2	21.0647	16.3476	4.7171	-1.0918	2.13139
3	21.77	15.7971	5.9729	3
4	21.5675	15.8616	5.70594	4	21.7404	16.7764	4.96408	-0.844808	1.79603
5	21.3264	15.6583	5.66804	5	20.6204	16.1172	4.50323	-1.30566	2.47197
6	21.6566	15.7679	5.8887	6	21.4124	16.2963	5.11609	-0.692802	1.61642
Average	21.5801	15.7712	5.80889	Average	21.1526	16.3838	4.7688	-1.04009	2.08395
Median	21.6121	15.7825	5.79732	Median	21.0647	16.3476	4.7171	-1.0918	2.13139
SD	0.188353	0.0848256	0.145725	SD	0.434658	0.24195	0.26585	0.26585	0.373053
SEM			0.0728623				0.118892		0.166835
	P value
IHH	0.112236
PPIA	0.00201802
Ct	0.000217326
Relative Fold	0.59945
Fold Incr	2.05636
Tshr-/- NaOH	IHH	PPIA	∆Ct	Tshr-/- TH	IHH	PPIA	∆Ct	∆∆Ct	Fold ∆
1	21.9891	15.9526	6.03645	1	20.9251	16.3816	4.5435	-1.64832	3.13468
2	21.8268	15.9073	5.91948	2	21.0647	16.3476	4.7171	-1.47473	2.77931
3	22.8777	16.5529	6.3248	3
4	22.4585	15.9575	6.50094	4	21.7404	16.7764	4.96408	-1.22774	2.342
5	22.5653	16.2989	6.26643	5	20.6204	16.1172	4.50323	-1.68859	3.22342
6	21.8522	15.7494	6.10283	6	21.4124	16.2963	5.11609	-1.07573	2.10779
Average	22.2616	16.0698	6.19182	Average	21.1526	16.3838	4.7688	-1.42302	2.71744
Median	22.2238	15.9551	6.18463	Median	21.0647	16.3476	4.7171	-1.47473	2.77931
SD	0.433936	0.297068	0.212151	SD	0.434658	0.24195	0.26585	0.26585	0.486457
SEM			0.0866102				0.118892		0.21755
	P value
IHH	0.00224812
PPIA	0.0908793
Ct	3.90967e-06
Relative Fold	1.33905
Fold Incr	2.68146

## Sheet: Tnfsf11
Source Data for Figure 3A-3D
								PPIA	2015-01-23	CA
									2015-01-29	CA
10d Femur Head RNA
Tshr+/- NaOH	Tnsfn11	PPIA	∆Ct	Tshr-/- NaOH	Tnsfn11	PPIA	∆Ct	∆∆Ct	Fold ∆
1	23.9704	15.643	8.32733	1	24.6853	15.8842	8.80107	0.355334	0.781689
2	24.3269	16.2212	8.10572	2	24.6315	15.6593	8.97224	0.526504	0.694235
3				3
4	24.5791	16.2288	8.35037	4	25.5497	16.2913	9.25846	0.812724	0.569306			PPIA	Tnsfn11
5	24.5229	15.5344	8.98853	5	25.29	15.8885	9.40152	0.955784	0.515561		Blank	21.9533	27.6765
6	24.646	16.1893	8.45673	6	24.9047	15.6534	9.25129	0.805554	0.572142		Blank	22.3755
Average	24.4091	15.9633	8.44574	Average	25.0122	15.8753	9.13692	0.69118	0.626587
Median	24.5229	16.1893	8.35037	Median	24.9047	15.8842	9.25129	0.805554	0.572142
SD	0.272594	0.344464	0.329193	SD	0.396682	0.259417	0.243814	0.243814	0.108633
SEM			0.116387				0.0862011		0.0485823
	P value
Tnsfn11	0.0231195
PPIA	0.660274
Ct	0.00544386
Relative Fold	0.874213
Fold Incr	0.619347
Tshr+/- NaOH	Tnsfn11	PPIA	∆Ct	Tshr-/- TH	Tnsfn11	PPIA	∆Ct	∆∆Ct	Fold ∆
1	23.9704	15.643	8.32733	1	23.7395	15.3772	8.3623	-0.083436	1.05954
2	24.3269	16.2212	8.10572	2	23.7091	15.4561	8.25299	-0.192746	1.14294
3				3	23.7924	15.4107	8.3817	-0.064036	1.04539
4	24.5791	16.2288	8.35037	4
5	24.5229	15.5344	8.98853	5	23.4362	15.2593	8.17685	-0.268886	1.20488
6	24.646	16.1893	8.45673	6
Average	24.4091	15.9633	8.44574	Average	23.6693	15.3758	8.29346	-0.152276	1.11318
Median	24.5229	16.1893	8.35037	Median	23.7243	15.394	8.30764	-0.138091	1.10124
SD	0.272594	0.344464	0.329193	SD	0.159172	0.0841294	0.0961959	0.0961959	0.0747602
SEM			0.116387				0.0340104		0.0373801
	P value
Tnsfn11	0.00202214
PPIA	0.0132931
Ct	0.405866
Relative Fold	0.00314498
Fold Incr	1.11132
Tshr-/- NaOH	Tnsfn11	PPIA	∆Ct	Tshr-/- TH	Tnsfn11	PPIA	∆Ct	∆∆Ct	Fold ∆
1	24.6853	15.8842	8.80107	1	23.7395	15.3772	8.3623	-0.774616	1.71073
2	24.6315	15.6593	8.97224	2	23.7091	15.4561	8.25299	-0.883926	1.84539
3				3	23.7924	15.4107	8.3817	-0.755216	1.68788
4	25.5497	16.2913	9.25846	4
5	25.29	15.8885	9.40152	5	23.4362	15.2593	8.17685	-0.960066	1.9454
6	24.9047	15.6534	9.25129	6
Average	25.0122	15.8753	9.13692	Average	23.6693	15.3758	8.29346	-0.843456	1.79735
Median	24.9047	15.8842	9.25129	Median	23.7243	15.394	8.30764	-0.829271	1.77806
SD	0.396682	0.259417	0.243814	SD	0.159172	0.0841294	0.0961959	0.0961959	0.120708
SEM			0.0862011				0.0340104		0.060354
	P value
Tnsfn11	0.000401744
PPIA	0.00811838
Ct	0.000348406
Relative Fold	0.558398
Fold Incr	1.79434
10D SOC RNA
Tshr+/- NaOH	Tnsfn11	PPIA	∆Ct	Tshr-/- NaOH	Tnsfn11	PPIA	∆Ct	∆∆Ct	Fold ∆
1				1	24.6749	15.9526	8.72223	1.41689	0.37452
2				2	24.4489	15.9073	8.54166	1.23631	0.424458
3	22.8074	15.7971	7.01029	3	26.228	16.5529	9.67511	2.36976	0.193477
4	23.3085	15.8616	7.44691	4	25.4554	15.9575	9.49785	2.1925	0.218772			PPIA	Tnsfn11
5	22.8832	15.6583	7.22484	5	25.1981	16.2989	8.8992	1.59385	0.331285		Blank	14.4745	18.2861
6	23.3073	15.7679	7.53934	6	24.8586	15.7494	9.10919	1.80384	0.28641		Uni	23.0087	28.3382
Average	23.0766	15.7712	7.30535	Average	25.144	16.0698	9.07421	1.76886	0.304821
Median	23.0952	15.7825	7.33588	Median	25.0283	15.9551	9.0042	1.69885	0.308848
SD	0.268881	0.0848256	0.236877	SD	0.641803	0.297068	0.442697	0.442697	0.0894561
SEM			0.0967047				0.18073		0.0365203
	P value
Tnsfn11	0.000321921
PPIA	0.0907128
Ct	8.95078e-05
Relative Fold	4.89098
Fold Incr	0.293441
Tshr+/- NaOH	Tnsfn11	PPIA	∆Ct	Tshr-/- TH	Tnsfn11	PPIA	∆Ct	∆∆Ct	Fold ∆
				1	24.2592	16.3816	7.87756	0.572214	0.672584
				2	24.3041	16.3476	7.95648	0.651129	0.636782
3	22.8074	15.7971	7.01029	3	23.6759	15.7225	7.95336	0.648012	0.638159
4	23.3085	15.8616	7.44691	4	24.5452	16.7764	7.76885	0.463505	0.725222
5	22.8832	15.6583	7.22484	5	23.3318	16.1172	7.21464	-0.0907075	1.06489
6	23.3073	15.7679	7.53934	6	23.7489	16.2963	7.45259	0.147244	0.902974
Average	23.0766	15.7712	7.30535	Average	23.9775	16.2736	7.70392	0.398566	0.773435
Median	23.0952	15.7825	7.33588	Median	24.004	16.3219	7.82321	0.51786	0.698903
SD	0.268881	0.0848256	0.236877	SD	0.462264	0.346001	0.304281	0.304281	0.173895
SEM			0.0967047				0.124222		0.0709922
	P value
Tnsfn11	0.00829454
PPIA	0.0233693
Ct	0.0591702
Relative Fold	0.493994
Fold Incr	0.758612
Tshr-/- NaOH	Tnsfn11	PPIA	∆Ct	Tshr-/- TH	Tnsfn11	PPIA	∆Ct	∆∆Ct	Fold ∆
1	24.6749	15.9526	8.72223	1	24.2592	16.3816	7.87756	-1.19664	2.29206
2	24.4489	15.9073	8.54166	2	24.3041	16.3476	7.95648	-1.11773	2.17005
3	26.228	16.5529	9.67511	3	23.6759	15.7225	7.95336	-1.12085	2.17474
4	25.4554	15.9575	9.49785	4	24.5452	16.7764	7.76885	-1.30535	2.47144
5	25.1981	16.2989	8.8992	5	23.3318	16.1172	7.21464	-1.85957	3.62898
6	24.8586	15.7494	9.10919	6	23.7489	16.2963	7.45259	-1.62161	3.07719
Average	25.144	16.0698	9.07421	Average	23.9775	16.2736	7.70392	-1.37029	2.63575
Median	25.0283	15.9551	9.0042	Median	24.004	16.3219	7.82321	-1.251	2.38175
SD	0.641803	0.297068	0.442697	SD	0.462264	0.346001	0.304281	0.304281	0.592606
SEM			0.18073				0.124222		0.24193
	P value
Tnsfn11	0.00474877
PPIA	0.299281
Ct	9.52566e-05
Relative Fold	1.13638
Fold Incr	2.58523

## Sheet: Tnfrsf11b
Source Data for Figure 3A-3D
								PPIA	2015-01-23	CA
									2015-01-29	CA
10d Femur Head RNA
Tshr+/- NaOH	Tnfrsf11b	PPIA	∆Ct	Tshr-/- NaOH	Tnfrsf11b	PPIA	∆Ct	∆∆Ct	Fold ∆
1	19.8694	15.643	4.2264	1	20.1593	15.8842	4.27506	-0.096154	1.06892
2	20.61	16.2212	4.38882	2	20.4245	15.6593	4.76522	0.394006	0.761014
3				3
4	21.2187	16.2288	4.98996	4	20.6287	16.2913	4.33745	-0.033764	1.02368			PPIA	Tnfrsf11b
5	19.7492	15.5344	4.21482	5	20.5808	15.8885	4.69239	0.321176	0.800417		Blank	21.9533	32.3505
6	20.2254	16.1893	4.03607	6	20.2849	15.6534	4.63147	0.260256	0.83494		Blank	22.3755
Average	20.3346	15.9633	4.37121	Average	20.4156	15.8753	4.54032	0.169104	0.897794
Median	20.2254	16.1893	4.2264	Median	20.4245	15.8842	4.63147	0.260256	0.83494
SD	0.597607	0.344464	0.367732	SD	0.197215	0.259417	0.219962	0.219962	0.13899
SEM			0.130013				0.0777682		0.0621583
	P value
Tnfrsf11b	0.78055
PPIA	0.660274
Ct	0.403269
Relative Fold	0.151372
Fold Incr	0.889395
Tshr+/- NaOH	Tnfrsf11b	PPIA	∆Ct	Tshr-/- TH	Tnfrsf11b	PPIA	∆Ct	∆∆Ct	Fold ∆
1	19.8694	15.643	4.2264	1	20.6539	15.3772	5.27675	0.905536	0.533834
2	20.61	16.2212	4.38882	2	21.0039	15.4561	5.54776	1.17655	0.442409
3				3	20.0592	15.4107	4.64853	0.277316	0.825125
4	21.2187	16.2288	4.98996	4
5	19.7492	15.5344	4.21482	5	20.8978	15.2593	5.63847	1.26726	0.415449
6	20.2254	16.1893	4.03607	6	21.5969	16.898	4.69889	0.327676	0.796819
Average	20.3346	15.9633	4.37121	Average	20.8424	15.6803	5.16208	0.790866	0.602727
Median	20.2254	16.1893	4.2264	Median	20.8978	15.4107	5.27675	0.905536	0.533834
SD	0.597607	0.344464	0.367732	SD	0.558403	0.68462	0.465598	0.465598	0.195354
SEM			0.130013				0.164614		0.0873651
	P value
Tnfrsf11b	0.202474
PPIA	0.432822
Ct	0.0175829
Relative Fold	1.5787
Fold Incr	0.577997
Tshr-/- NaOH	Tnfrsf11b	PPIA	∆Ct	Tshr-/- TH	Tnfrsf11b	PPIA	∆Ct	∆∆Ct	Fold ∆
1	20.1593	15.8842	4.27506	1	20.6539	15.3772	5.27675	0.736432	0.600222
2	20.4245	15.6593	4.76522	2	21.0039	15.4561	5.54776	1.00744	0.497427
3				3	20.0592	15.4107	4.64853	0.108212	0.927737
4	20.6287	16.2913	4.33745	4
5	20.5808	15.8885	4.69239	5	20.8978	15.2593	5.63847	1.09815	0.467114
6	20.2849	15.6534	4.63147	6	21.5969	16.898	4.69889	0.158572	0.895911
Average	20.4156	15.8753	4.54032	Average	20.8424	15.6803	5.16208	0.621762	0.677682
Median	20.4245	15.8842	4.63147	Median	20.8978	15.4107	5.27675	0.736432	0.600222
SD	0.197215	0.259417	0.219962	SD	0.558403	0.68462	0.465598	0.465598	0.219649
SEM			0.0777682				0.164614		0.0982299
	P value
Tnfrsf11b	0.145803
PPIA	0.567824
Ct	0.0270772
Relative Fold	1.18235
Fold Incr	0.649877
10D SOC RNA
Tshr+/- NaOH	Tnfrsf11b	PPIA	∆Ct	Tshr-/- NaOH	Tnfrsf11b	PPIA	∆Ct	∆∆Ct	Fold ∆
1				1	20.8275	15.9526	4.87489	-0.27228	1.20771
2				2	20.8003	15.9073	4.89297	-0.2542	1.19267
3	21.3359	15.7971	5.53886	3	21.4945	16.5529	4.94159	-0.205576	1.15315
4	20.7181	15.8616	4.85655	4
5	20.9744	15.6583	5.31605	5	21.0995	16.2989	4.80061	-0.346561	1.27153
6	20.6451	15.7679	4.87721	6	20.3019	15.7494	4.55246	-0.594703	1.51016
Average	20.9184	15.7712	5.14717	Average	20.9047	16.0922	4.8125	-0.334664	1.26704			PPIA	Tnfrsf11b
Median	20.8463	15.7825	5.09663	Median	20.8275	15.9526	4.87489	-0.27228	1.20771		Blank	14.4745	22.6178
SD	0.312106	0.0848256	0.336293	SD	0.437624	0.326394	0.153942	0.153942	0.142434		Uni	23.0087	36.7719
SEM			0.137291				0.0628464		0.0581485
	P value
Tnfrsf11b	0.959665
PPIA	0.10037
Ct	0.0851889
Relative Fold	0.0326605
Fold Incr	1.26108
Tshr+/- NaOH	Tnfrsf11b	PPIA	∆Ct	Tshr-/- TH	Tnfrsf11b	PPIA	∆Ct	∆∆Ct	Fold ∆
1				1	21.4479	16.3816	5.06623	-0.0809343	1.0577
2				2
3	21.3359	15.7971	5.53886	3	20.8943	15.7225	5.1718	0.0246356	0.983069
4	20.7181	15.8616	4.85655	4	21.9949	16.7764	5.21852	0.0713503	0.951747
5	20.9744	15.6583	5.31605	5	21.3606	16.1172	5.24341	0.0962393	0.935468
6	20.6451	15.7679	4.87721	6	21.5021	16.2963	5.20585	0.0586817	0.960141
Average	20.9184	15.7712	5.14717	Average	21.44	16.2588	5.18116	0.0339945	0.977626
Median	20.8463	15.7825	5.09663	Median	21.4479	16.2963	5.20585	0.0586817	0.960141
SD	0.312106	0.0848256	0.336293	SD	0.39239	0.384712	0.0692379	0.0692379	0.0479444
SEM			0.137291				0.0282663		0.0195732
	P value
Tnfrsf11b	0.0677441
PPIA	0.043791
Ct	0.829198
Relative Fold	0.0106569
Fold Incr	0.976712
Tshr-/- NaOH	Tnfrsf11b	PPIA	∆Ct	Tshr-/- TH	Tnfrsf11b	PPIA	∆Ct	∆∆Ct	Fold ∆
1	20.8275	15.9526	4.87489	1	21.4479	16.3816	5.06623	0.25373	0.838725
2	20.8003	15.9073	4.89297	2
3	21.4945	16.5529	4.94159	3	20.8943	15.7225	5.1718	0.359299	0.779543
4				4	21.9949	16.7764	5.21852	0.406014	0.754706
5	21.0995	16.2989	4.80061	5	21.3606	16.1172	5.24341	0.430903	0.741797
6	20.3019	15.7494	4.55246	6	21.5021	16.2963	5.20585	0.393346	0.761362
Average	20.9047	16.0922	4.8125	Average	21.44	16.2588	5.18116	0.368658	0.775227
Median	20.8275	15.9526	4.87489	Median	21.4479	16.2963	5.20585	0.393346	0.761362
SD	0.437624	0.326394	0.153942	SD	0.39239	0.384712	0.0692379	0.0692379	0.0380184
SEM			0.0628464				0.0282663		0.0155209
	P value
Tnfrsf11b	0.0761253
PPIA	0.48144
Ct	0.00121865
Relative Fold	0.191753
Fold Incr	0.774502

## Sheet: Vegfa
Source Data for Figure 3A-3D
								PPIA	2015-01-23	CA
									2015-02-18	CA
10d Femur Head RNA
Tshr+/- NaOH	Vegfa	PPIA	∆Ct	Tshr-/- NaOH	Vegfa	PPIA	∆Ct	∆∆Ct	Fold ∆
1	21.324	15.643	5.68097	1	22.0749	15.8842	6.19068	0.438388	0.737959
2	21.9263	16.2212	5.70506	2	22.1773	15.6593	6.51805	0.765758	0.588144
3	21.414	15.8063	5.60769	3	22.36	16.4132	5.94687	0.194578	0.873828
4	21.8164	16.2288	5.58767	4	22.2241	16.2913	5.93285	0.180558	0.882362			PPIA	Vegfa
5	21.7144	15.5344	6.18007	5	21.8191	15.8885	5.9306	0.178308	0.883739		Blank	21.9533	Undetermined
6				6	22.4356	15.6534	6.78223	1.02994	0.489731		Blank	22.3755
Average	21.639	15.8867	5.75229	Average	22.1818	15.965	6.21688	0.464588	0.742627
Median	21.7144	15.8063	5.68097	Median	22.2007	15.8864	6.06877	0.316483	0.805894
SD	0.259595	0.323606	0.244091	SD	0.219554	0.319449	0.359596	0.359596	0.169997
SEM			0.0862992				0.127136		0.069401
	P value
Vegfa	0.00445943
PPIA	0.696963
Ct	0.0369447
Relative Fold	0.679279
Fold Incr	0.724678
Tshr+/- NaOH	Vegfa	PPIA	∆Ct	Tshr-/- TH	Vegfa	PPIA	∆Ct	∆∆Ct	Fold ∆
1	21.324	15.643	5.68097	1	21.3206	15.3772	5.94338	0.191088	0.875945
2	21.9263	16.2212	5.70506	2	21.9877	15.4561	6.5316	0.779308	0.582646
3	21.414	15.8063	5.60769	3	21.3997	15.4107	5.98896	0.236668	0.848703
4	21.8164	16.2288	5.58767	4
5	21.7144	15.5344	6.18007	5	22.1306	15.2593	6.8713	1.11901	0.46041
6				6
Average	21.639	15.8867	5.75229	Average	21.7097	15.3758	6.33381	0.581518	0.691926
Median	21.7144	15.8063	5.68097	Median	21.6937	15.394	6.26028	0.507988	0.715675
SD	0.259595	0.323606	0.244091	SD	0.409072	0.0841294	0.44698	0.44698	0.203293
SEM			0.0862992				0.158031		0.101646
	P value
Vegfa	0.760368
PPIA	0.0189207
Ct	0.0406402
Relative Fold	1.05781
Fold Incr	0.66826
Tshr-/- NaOH	Vegfa	PPIA	∆Ct	Tshr-/- TH	Vegfa	PPIA	∆Ct	∆∆Ct	Fold ∆
1	22.0749	15.8842	6.19068	1	21.3206	15.3772	5.94338	-0.2735	1.20874
2	22.1773	15.6593	6.51805	2	21.9877	15.4561	6.5316	0.31472	0.804007
3	22.36	16.4132	5.94687	3	21.3997	15.4107	5.98896	-0.22792	1.17115
4	22.2241	16.2913	5.93285	4
5	21.8191	15.8885	5.9306	5	22.1306	15.2593	6.8713	0.65442	0.635331
6	22.4356	15.6534	6.78223	6
Average	22.1818	15.965	6.21688	Average	21.7097	15.3758	6.33381	0.11693	0.954805
Median	22.2007	15.8864	6.06877	Median	21.6937	15.394	6.26028	0.0434	0.987576
SD	0.219554	0.319449	0.359596	SD	0.409072	0.0841294	0.44698	0.44698	0.280528
SEM			0.127136				0.158031		0.140264
	P value
Vegfa	0.0431579
PPIA	0.00760976
Ct	0.658434
Relative Fold	0.317995
Fold Incr	0.922148
10D SOC RNA
Tshr+/- NaOH	Vegfa	PPIA	∆Ct	Tshr-/- NaOH	Vegfa	PPIA	∆Ct	∆∆Ct	Fold ∆
1	21.9956	15.653	6.34266	1	22.3826	15.6828	6.69978	0.159568	0.895293
2	21.998	15.6481	6.34985	2	21.9686	15.8013	6.16727	-0.372942	1.29499
3	22.8882	15.7194	7.16885	3	22.3734	15.9434	6.4301	-0.110112	1.07931
4	22.6083	15.6593	6.949	4	22.1811	16.1303	6.05071	-0.489502	1.40396			PPIA	Vegfa
5	21.7457	15.5524	6.19325	5	22.1307	15.7514	6.37932	-0.160892	1.11798		blank	24.8398	32.7487
6	21.949	15.7113	6.23766	6	22.4442	15.8148	6.62942	0.0892083	0.940038		blank	24.9985	Undetermined
Average	22.1975	15.6572	6.54021	Average	22.2468	15.854	6.39277	-0.147445	1.12193
Median	21.9968	15.6561	6.34625	Median	22.2773	15.808	6.40471	-0.135502	1.09864
SD	0.445492	0.0598084	0.412184	SD	0.183667	0.160312	0.252859	0.252859	0.197875
SEM			0.168273				0.103229		0.0807819
	P value
Vegfa	0.807185
PPIA	0.018268
Ct	0.472329
Relative Fold	0.0111121
Fold Incr	1.10761
Tshr+/- NaOH	Vegfa	PPIA	∆Ct	Tshr-/- TH	Vegfa	PPIA	∆Ct	∆∆Ct	Fold ∆
1	21.9956	15.653	6.34266	1	21.4119	15.2357	6.17621	-0.364002	1.28699
2	21.998	15.6481	6.34985	2	21.4938	15.4839	6.00994	-0.530272	1.4442
3	22.8882	15.7194	7.16885	3
4	22.6083	15.6593	6.949	4	21.3551	15.7582	5.59691	-0.943302	1.92292
5	21.7457	15.5524	6.19325	5	22.0132	15.6947	6.31853	-0.221682	1.16609
6	21.949	15.7113	6.23766	6	21.8885	15.7903	6.0982	-0.442012	1.3585
Average	22.1975	15.6572	6.54021	Average	21.6325	15.5926	6.03996	-0.500254	1.43574
Median	21.9968	15.6561	6.34625	Median	21.4938	15.6947	6.0982	-0.442012	1.3585
SD	0.445492	0.0598084	0.412184	SD	0.298072	0.232447	0.272375	0.272375	0.290785
SEM			0.168273				0.111196		0.118712
	P value
Vegfa	0.039186
PPIA	0.524235
Ct	0.0458641
Relative Fold	0.0519289
Fold Incr	1.41446
Tshr-/- NaOH	Vegfa	PPIA	∆Ct	Tshr-/- TH	Vegfa	PPIA	∆Ct	∆∆Ct	Fold ∆
1	22.3826	15.6828	6.69978	1	21.4119	15.2357	6.17621	-0.216557	1.16196
2	21.9686	15.8013	6.16727	2	21.4938	15.4839	6.00994	-0.382827	1.30389
3	22.3734	15.9434	6.4301	3
4	22.1811	16.1303	6.05071	4	21.3551	15.7582	5.59691	-0.795857	1.73611
5	22.1307	15.7514	6.37932	5	22.0132	15.6947	6.31853	-0.0742367	1.0528
6	22.4442	15.8148	6.62942	6	21.8885	15.7903	6.0982	-0.294567	1.22652
Average	22.2468	15.854	6.39277	Average	21.6325	15.5926	6.03996	-0.352809	1.29626
Median	22.2773	15.808	6.40471	Median	21.4938	15.6947	6.0982	-0.294567	1.22652
SD	0.183667	0.160312	0.252859	SD	0.298072	0.232447	0.272375	0.272375	0.262534
SEM			0.103229				0.111196		0.107179
	P value
Vegfa	0.00229386
PPIA	0.0547689
Ct	0.0530179
Relative Fold	0.00646964
Fold Incr	1.27704

## Sheet: Bmp2
Source Data for Figure 3A-3D
							CA	2015-05-07	PPIA
							CA	2015-10-20
10d Femur Head RNA
Tshr+/- NaOH	BMP2	PPIA	∆Ct	Tshr-/- NaOH	BMP2	PPIA	∆Ct	∆∆Ct	Fold ∆
1	22.666	15.5834	7.08261	1	24.6991	15.8647	8.83436	1.09519	0.468073
2	24.1108	16.0048	8.10607	2	23.4245	15.6808	7.74371	0.004544	0.996855
3	23.7434	15.6712	8.07223	3	23.8661	16.3774	7.48869	-0.250476	1.1896
4	24.0922	15.9991	8.0931	4	24.7514	16.341	8.41039	0.671224	0.627974
5	22.862	15.5202	7.34182	5
6				6	23.3466	15.6391	7.70745	-0.031716	1.02223
Average	23.4949	15.7557	7.73917	Average	24.0175	15.9806	8.03692	0.297754	0.860946			PPIA	BMP2
Median	23.7434	15.6712	8.07223	Median	23.8661	15.8647	7.74371	0.004544	0.996855		Blank	21.9672	Undetermined
SD	0.686573	0.231073	0.489839	SD	0.675998	0.356129	0.563575	0.563575	0.300467		Blank
SEM			0.173184				0.199254		0.106231
	P value
BMP2	0.259741
PPIA	0.270159
Ct	0.398602
Relative Fold	0.741888
Fold Incr	0.813518
Tshr+/- NaOH	BMP2	PPIA	∆Ct	Tshr-/- TH	BMP2	PPIA	∆Ct	∆∆Ct	Fold ∆
1	22.666	15.5834	7.08261	1
2	24.1108	16.0048	8.10607	2	23.404	15.4366	7.96732	0.228154	0.853727
3	23.7434	15.6712	8.07223	3	23.3688	15.3524	8.01641	0.277244	0.825166
4	24.0922	15.9991	8.0931	4
5	22.862	15.5202	7.34182	5	23.2625	15.2478	8.01468	0.275514	0.826156
6				6	25.2011	16.9271	8.27404	0.534874	0.690219
Average	23.4949	15.7557	7.73917	Average	23.8091	15.741	8.06811	0.328947	0.798817
Median	23.7434	15.6712	8.07223	Median	23.3864	15.3945	8.01554	0.276379	0.825661
SD	0.686573	0.231073	0.489839	SD	0.929972	0.794503	0.139156	0.139156	0.0735986
SEM			0.173184				0.0491992		0.026021
	P value
BMP2	0.576583
PPIA	0.969207
Ct	0.239362
Relative Fold	0.21912
Fold Incr	0.796118
Tshr-/- NaOH	BMP2	PPIA	∆Ct	Tshr-/- TH	BMP2	PPIA	∆Ct	∆∆Ct	Fold ∆
1	24.6991	15.8647	8.83436	1
2	23.4245	15.6808	7.74371	2	23.404	15.4366	7.96732	-0.0696	1.04943
3	23.8661	16.3774	7.48869	3	23.3688	15.3524	8.01641	-0.02051	1.01432
4	24.7514	16.341	8.41039	4
5				5	23.2625	15.2478	8.01468	-0.02224	1.01554
6	23.3466	15.6391	7.70745	6	25.2011	16.9271	8.27404	0.23712	0.848437
Average	24.0175	15.9806	8.03692	Average	23.8091	15.741	8.06811	0.0311925	0.981929
Median	23.8661	15.8647	7.74371	Median	23.3864	15.3945	8.01554	-0.021375	1.01493
SD	0.675998	0.356129	0.563575	SD	0.929972	0.794503	0.139156	0.139156	0.0904696
SEM			0.199254				0.0491992		0.0319858
	P value
BMP2	0.707479
PPIA	0.561169
Ct	0.917995
Relative Fold	0.0290187	0.0116562
Fold Incr	0.978611
10D SOC RNA
Tshr+/- NaOH	BMP2	PPIA	∆Ct	Tshr-/- NaOH	BMP2	PPIA	∆Ct	∆∆Ct	Fold ∆
1	23.1241	15.653	7.47114	1
2	22.8688	15.6481	7.22069	2	22.9056	15.8013	7.10429	-0.388903	1.3094
3	23.007	15.7194	7.28766	3	22.8674	15.9434	6.92408	-0.569113	1.48361
4	23.4546	15.6593	7.7953	4	22.898	16.1303	6.76764	-0.725553	1.65353			PPIA	BMP2
5	23.2838	15.5524	7.73142	5	22.5691	15.7514	6.81768	-0.675513	1.59716		blank	24.8398
6	23.1643	15.7113	7.45295	6	22.4825	15.8148	6.66777	-0.825423	1.77205		blank	24.9985	Undetermined
Average	23.1504	15.6572	7.49319	Average	22.7445	15.8882	6.85629	-0.636901	1.56315
Median	23.1442	15.6561	7.46204	Median	22.8674	15.8148	6.81768	-0.675513	1.59716
SD	0.205445	0.0598084	0.230923	SD	0.202487	0.152756	0.166575	0.166575	0.175844
SEM			0.0942741				0.0680039		0.071788
	P value
BMP2	0.00947069
PPIA	0.00749214
Ct	0.000615506
Relative Fold	0.221207
Fold Incr	1.55499
Tshr+/- NaOH	BMP2	PPIA	∆Ct	Tshr-/- TH	BMP2	PPIA	∆Ct	∆∆Ct	Fold ∆
1	23.1241	15.653	7.47114	1	22.2963	15.2357	7.06063	-0.432563	1.34963
2	22.8688	15.6481	7.22069	2	22.3109	15.4839	6.82705	-0.666143	1.58683
3	23.007	15.7194	7.28766	3	22.8149	15.5028	7.31209	-0.181103	1.13375
4	23.4546	15.6593	7.7953	4	22.803	15.7582	7.04487	-0.448323	1.36445
5	23.2838	15.5524	7.73142	5	22.7788	15.6947	7.08412	-0.409073	1.32783
6	23.1643	15.7113	7.45295	6
Average	23.1504	15.6572	7.49319	Average	22.6008	15.5351	7.06575	-0.427441	1.3525
Median	23.1442	15.6561	7.46204	Median	22.7788	15.5028	7.06063	-0.432563	1.34963
SD	0.205445	0.0598084	0.230923	SD	0.271641	0.205262	0.172091	0.172091	0.160872
SEM			0.0942741				0.0702557		0.0656757
	P value
BMP2	0.00404389
PPIA	0.194406
Ct	0.00771816
Relative Fold	0.065204
Fold Incr	1.34485
Tshr-/- NaOH	BMP2	PPIA	∆Ct	Tshr-/- TH	BMP2	PPIA	∆Ct	∆∆Ct	Fold ∆
1				1	22.2963	15.2357	7.06063	0.204338	0.867937
2	22.9056	15.8013	7.10429	2	22.3109	15.4839	6.82705	-0.029242	1.02048
3	22.8674	15.9434	6.92408	3	22.8149	15.5028	7.31209	0.455798	0.729107
4	22.898	16.1303	6.76764	4	22.803	15.7582	7.04487	0.188578	0.87747
5	22.5691	15.7514	6.81768	5	22.7788	15.6947	7.08412	0.227828	0.85392
6	22.4825	15.8148	6.66777	6
Average	22.7445	15.8882	6.85629	Average	22.6008	15.5351	7.06575	0.20946	0.869782
Median	22.8674	15.8148	6.81768	Median	22.7788	15.5028	7.06063	0.204338	0.867937
SD	0.202487	0.152756	0.166575	SD	0.271641	0.205262	0.172091	0.172091	0.103456
SEM			0.0680039				0.0702557		0.0422356
	P value
BMP2	0.370642
PPIA	0.0149689
Ct	0.0862472
Relative Fold	0.145581
Fold Incr	0.864861

## Sheet: Tgfa
Source Data for Figure 3A-3D
							CA	2015-05-07	PPIA
							CA	2015-11-16
10d Femur Head RNA
Tshr+/- NaOH	TGFa	PPIA	∆Ct	Tshr-/- NaOH	TGFa	PPIA	∆Ct	∆∆Ct	Fold ∆
1	25.9836	15.5834	10.4002	1	25.4133	15.8647	9.54861	-0.981666	1.97474
2	26.7918	16.0048	10.787	2	25.923	15.6808	10.2423	-0.288016	1.22096
3	26.3766	15.6712	10.7055	3	25.8005	16.3774	9.42308	-1.1072	2.15427
4	26.3172	15.9991	10.3182	4	26.3364	16.341	9.99539	-0.534886	1.44883
5	25.9607	15.5202	10.4405	5	24.9149	15.913	9.00185	-1.52843	2.88471
6				6	25.8114	15.6391	10.1722	-0.358036	1.28168			PPIA	TGFa
Average	26.286	15.7557	10.5303	Average	25.6999	15.9693	9.73057	-0.799704	1.82753		Blank	21.9672	37.8662
Median	26.3172	15.6712	10.4405	Median	25.8059	15.8889	9.772	-0.758276	1.71179		Blank
SD	0.339952	0.231073	0.204057	SD	0.484949	0.319725	0.486975	0.486975	0.641148
SEM			0.0721451				0.172172		0.261747
	P value
TGFa	0.049478
PPIA	0.245154
Ct	0.00778557
Relative Fold	0.0977999
Fold Incr	1.74074
Tshr+/- NaOH	TGFa	PPIA	∆Ct	Tshr-/- TH	TGFa	PPIA	∆Ct	∆∆Ct	Fold ∆
1	25.9836	15.5834	10.4002	1	26.46	15.3197	11.1404	0.610084	0.655159
2	26.7918	16.0048	10.787	2	26.6563	15.4366	11.2196	0.689344	0.620136
3	26.3766	15.6712	10.7055	3	26.3638	15.3524	11.0114	0.481144	0.716409
4	26.3172	15.9991	10.3182	4
5	25.9607	15.5202	10.4405	5	26.1312	15.2478	10.8834	0.353154	0.782871
6				6
Average	26.286	15.7557	10.5303	Average	26.4028	15.3391	11.0637	0.533432	0.693644
Median	26.3172	15.6712	10.4405	Median	26.4119	15.336	11.0759	0.545614	0.685784
SD	0.339952	0.231073	0.204057	SD	0.218163	0.0783178	0.147669	0.147669	0.0715641
SEM			0.0721451				0.0522088		0.035782
	P value
TGFa	0.572139
PPIA	0.0112692
Ct	0.00328133
Relative Fold	0.463898
Fold Incr	0.690909
Tshr-/- NaOH	TGFa	PPIA	∆Ct	Tshr-/- TH	TGFa	PPIA	∆Ct	∆∆Ct	Fold ∆
1	25.4133	15.8647	9.54861	1	26.46	15.3197	11.1404	1.40979	0.376367
2	25.923	15.6808	10.2423	2	26.6563	15.4366	11.2196	1.48905	0.356247
3	25.8005	16.3774	9.42308	3	26.3638	15.3524	11.0114	1.28085	0.411553
4	26.3364	16.341	9.99539	4
5	24.9149	15.913	9.00185	5	26.1312	15.2478	10.8834	1.15286	0.449733
6	25.8114	15.6391	10.1722	6
Average	25.6999	15.9693	9.73057	Average	26.4028	15.3391	11.0637	1.33314	0.398475
Median	25.8059	15.8889	9.772	Median	26.4119	15.336	11.0759	1.34532	0.39396
SD	0.484949	0.319725	0.486975	SD	0.218163	0.0783178	0.147669	0.147669	0.0411112
SEM			0.172172				0.0522088		0.0205556
	P value
TGFa	0.0278312
PPIA	0.00527504
Ct	0.000800219
Relative Fold	2.19278
Fold Incr	0.396905
10D SOC RNA
Tshr+/- NaOH	TGFa	PPIA	∆Ct	Tshr-/- NaOH	TGFa	PPIA	∆Ct	∆∆Ct	Fold ∆
1	24.3635	15.653	8.7105	1	24.3874	15.6828	8.70458	0.184064	0.88022
2	23.9802	15.6481	8.33204	2	23.9717	15.8013	8.17038	-0.350136	1.27468
3				3	24.3728	15.9434	8.42943	-0.091086	1.06517
4	24.6666	15.6593	9.00734	4	24.1531	16.1303	8.02273	-0.497786	1.41204
5	23.9141	15.5524	8.36166	5	23.9064	15.7514	8.15499	-0.365526	1.28835			PPIA	TGFa
6	23.9024	15.7113	8.19104	6	24.3973	15.8148	8.58251	0.061994	0.957939		blank	24.8398	37.8662
Average	24.1653	15.6448	8.52052	Average	24.1981	15.854	8.3441	-0.176413	1.1464		blank	24.9985
Median	23.9802	15.653	8.36166	Median	24.2629	15.808	8.2999	-0.220611	1.16993
SD	0.338039	0.0575577	0.332567	SD	0.221098	0.160312	0.26955	0.26955	0.209829
SEM			0.13577				0.110043		0.0856623
	P value
TGFa	0.85064
PPIA	0.0223842
Ct	0.355641
Relative Fold	0.00867458
Fold Incr	1.13007
Tshr+/- NaOH	TGFa	PPIA	∆Ct	Tshr-/- TH	TGFa	PPIA	∆Ct	∆∆Ct	Fold ∆
1	24.3635	15.653	8.7105	1
2	23.9802	15.6481	8.33204	2	23.6567	15.4839	8.17284	-0.347676	1.27251
3				3	23.9041	15.5028	8.40129	-0.119226	1.08615
4	24.6666	15.6593	9.00734	4	23.8283	15.7582	8.07016	-0.450356	1.36638
5	23.9141	15.5524	8.36166	5	24.5437	15.6947	8.84897	0.328454	0.796389
6	23.9024	15.7113	8.19104	6	24.5027	15.7903	8.71236	0.191844	0.875486
Average	24.1653	15.6448	8.52052	Average	24.0871	15.646	8.44112	-0.079392	1.07938
Median	23.9802	15.653	8.36166	Median	23.9041	15.6947	8.40129	-0.119226	1.08615
SD	0.338039	0.0575577	0.332567	SD	0.408314	0.143674	0.335814	0.335814	0.245646
SEM			0.13577				0.137096		0.109856
	P value
TGFa	0.74987
PPIA	0.987039
Ct	0.716965
Relative Fold	0.0657523
Fold Incr	1.05657
Tshr-/- NaOH	TGFa	PPIA	∆Ct	Tshr-/- TH	TGFa	PPIA	∆Ct	∆∆Ct	Fold ∆
1	24.3874	15.6828	8.70458	1
2	23.9717	15.8013	8.17038	2	23.6567	15.4839	8.17284	-0.171263	1.12604
3	24.3728	15.9434	8.42943	3	23.9041	15.5028	8.40129	0.0571867	0.961137
4	24.1531	16.1303	8.02273	4	23.8283	15.7582	8.07016	-0.273943	1.20911
5	23.9064	15.7514	8.15499	5	24.5437	15.6947	8.84897	0.504867	0.704726
6	24.3973	15.8148	8.58251	6	24.5027	15.7903	8.71236	0.368257	0.774718
Average	24.1981	15.854	8.3441	Average	24.0871	15.646	8.44112	0.0970207	0.955146
Median	24.2629	15.808	8.2999	Median	23.9041	15.6947	8.40129	0.0571867	0.961137
SD	0.221098	0.160312	0.26955	SD	0.408314	0.143674	0.335814	0.335814	0.217373
SEM			0.110043				0.137096		0.097212
	P value
TGFa	0.578705
PPIA	0.051573
Ct	0.607177
Relative Fold	0.187346
Fold Incr	0.934962

## Sheet: Sox9
Source Data for Figure 3A-3D
							CA	2015-05-07	PPIA
							CA	2015-05-05	Sox9
10d Femur Head RNA
Tshr+/- NaOH	Sox9	PPIA	∆Ct	Tshr-/- NaOH	Sox9	PPIA	∆Ct	∆∆Ct	Fold ∆
1	18.8998	15.5834	3.31645	1
2	19.4341	16.0048	3.42929	2	18.8082	15.6808	3.12747	-0.581694	1.49661
3	20.2259	15.6712	4.55479	3	18.7712	16.3774	2.3938	-1.31536	2.48865
4	20.0178	15.9991	4.01878	4	19.1764	16.341	2.83544	-0.873724	1.83239			PPIA	Sox9
5	18.7467	15.5202	3.22651	5	18.3759	15.913	2.46291	-1.24625	2.37225		Blank	21.9672	Undetermined
6				6	19.3194	15.6391	3.68024	-0.028924	1.02025		Blank
Average	19.4649	15.7557	3.70916	Average	18.8902	15.9903	2.89997	-0.809192	1.84203
Median	19.4341	15.6712	3.42929	Median	18.8082	15.913	2.83544	-0.873724	1.83239
SD	0.655938	0.231073	0.564901	SD	0.371305	0.35284	0.52725	0.52725	0.611142
SEM			0.199723				0.186411		0.216071
	P value
Sox9	0.126647
PPIA	0.24886
Ct	0.0472982
Relative Fold	0.0794912
Fold Incr	1.75223
Tshr+/- NaOH	Sox9	PPIA	∆Ct	Tshr-/- TH	Sox9	PPIA	∆Ct	∆∆Ct	Fold ∆
1	18.8998	15.5834	3.31645	1	19.6425	15.3197	4.32278	0.613616	0.653557
2	19.4341	16.0048	3.42929	2	19.7449	15.4366	4.30824	0.599076	0.660177
3	20.2259	15.6712	4.55479	3
4	20.0178	15.9991	4.01878	4	19.4142	15.4735	3.94071	0.231546	0.851722
5	18.7467	15.5202	3.22651	5	20.2883	15.2478	5.04048	1.33132	0.397406
6				6	22.5288	16.9271	5.60168	1.89252	0.269337
Average	19.4649	15.7557	3.70916	Average	20.3237	15.6809	4.64278	0.933614	0.566439
Median	19.4341	15.6712	3.42929	Median	19.7449	15.4366	4.32278	0.613616	0.653557
SD	0.655938	0.231073	0.564901	SD	1.27376	0.702445	0.667996	0.667996	0.231627
SEM			0.199723				0.236172		0.0818925
	P value
Sox9	0.21693
PPIA	0.826816
Ct	0.0441089
Relative Fold	2.56515
Fold Incr	0.523545
Tshr-/- NaOH	Sox9	PPIA	∆Ct	Tshr-/- TH	Sox9	PPIA	∆Ct	∆∆Ct	Fold ∆
1				1	19.6425	15.3197	4.32278	1.42281	0.372986
2	18.8082	15.6808	3.12747	2	19.7449	15.4366	4.30824	1.40827	0.376764
3	18.7712	16.3774	2.3938	3
4	19.1764	16.341	2.83544	4	19.4142	15.4735	3.94071	1.04074	0.486079
5	18.3759	15.913	2.46291	5	20.2883	15.2478	5.04048	2.14051	0.2268
6	19.3194	15.6391	3.68024	6	22.5288	16.9271	5.60168	2.70171	0.153711
Average	18.8902	15.9903	2.89997	Average	20.3237	15.6809	4.64278	1.74281	0.323268
Median	18.8082	15.913	2.83544	Median	19.7449	15.4366	4.32278	1.42281	0.372986
SD	0.371305	0.35284	0.52725	SD	1.27376	0.702445	0.667996	0.667996	0.13219
SEM			0.186411				0.236172		0.0467362
	P value
Sox9	0.0421193
PPIA	0.404566
Ct	0.0018036
Relative Fold	5.81197
Fold Incr	0.298788
10D SOC RNA
Tshr+/- NaOH	Sox9	PPIA	∆Ct	Tshr-/- NaOH	Sox9	PPIA	∆Ct	∆∆Ct	Fold ∆
1				1	19.3503	15.9526	3.39766	0.217027	0.860336
2				2	18.766	15.9073	2.85867	-0.321963	1.25003
3	19.0397	15.7971	3.24268	3	18.8613	16.5529	2.30845	-0.872175	1.83042
4	19.1824	15.8616	3.32084	4	18.2534	15.9575	2.29589	-0.884733	1.84642
5	18.7588	15.6583	3.10049	5	18.8924	16.2989	2.59351	-0.587115	1.50224			PPIA
6	18.8264	15.7679	3.0585	6							Blank	14.4745	20.1845
Average	18.9519	15.7712	3.18063	Average	18.8247	16.1339	2.69084	-0.489792	1.45789		Uni	23.0087	Undetermined
Median	18.9331	15.7825	3.17159	Median	18.8613	15.9575	2.59351	-0.587115	1.50224
SD	0.19483	0.0848256	0.122265	SD	0.391143	0.281991	0.458102	0.458102	0.415927
SEM			0.0499144				0.187019		0.169801
	P value
Sox9	0.574555
PPIA	0.0438489
Ct	0.0790289
Relative Fold	0.00100427
Fold Incr	1.40424
Tshr+/- NaOH	Sox9	PPIA	∆Ct	Tshr-/- TH	Sox9	PPIA	∆Ct	∆∆Ct	Fold ∆
1				1	19.4868	16.3816	3.10518	-0.0754511	1.05369
2				2	19.9198	16.3476	3.57222	0.391592	0.762288
3	19.0397	15.7971	3.24268	3
4	19.1824	15.8616	3.32084	4	20.274	16.7764	3.49767	0.317043	0.802713
5	18.7588	15.6583	3.10049	5	19.8849	16.1172	3.76767	0.587042	0.665707
6	18.8264	15.7679	3.0585	6	19.7949	16.2963	3.49861	0.317981	0.802191
Average	18.9519	15.7712	3.18063	Average	19.8721	16.3838	3.48827	0.307641	0.817318
Median	18.9331	15.7825	3.17159	Median	19.8849	16.3476	3.49861	0.317981	0.802191
SD	0.19483	0.0848256	0.122265	SD	0.282131	0.24195	0.240867	0.240867	0.143465
SEM			0.0499144				0.0983335		0.0585692
	P value
Sox9	0.000887305
PPIA	0.00201802
Ct	0.0545257
Relative Fold	0.300861
Fold Incr	0.807962
Tshr-/- NaOH	Sox9	PPIA	∆Ct	Tshr-/- TH	Sox9	PPIA	∆Ct	∆∆Ct	Fold ∆
1	19.3503	15.9526	3.39766	1	19.4868	16.3816	3.10518	0.414341	0.750362
2	18.766	15.9073	2.85867	2	19.9198	16.3476	3.57222	0.881384	0.542847
3	18.8613	16.5529	2.30845	3
4	18.2534	15.9575	2.29589	4	20.274	16.7764	3.49767	0.806835	0.571635
5	18.8924	16.2989	2.59351	5	19.8849	16.1172	3.76767	1.07683	0.474068
6				6	19.7949	16.2963	3.49861	0.807773	0.571263
Average	18.8247	16.1339	2.69084	Average	19.8721	16.3838	3.48827	0.797433	0.582035
Median	18.8613	15.9575	2.59351	Median	19.8849	16.3476	3.49861	0.807773	0.571263
SD	0.391143	0.281991	0.458102	SD	0.282131	0.24195	0.240867	0.240867	0.102165
SEM			0.187019				0.0983335		0.0417087
	P value
Sox9	0.00126185
PPIA	0.170925
Ct	0.0087565
Relative Fold	1.07807
Fold Incr	0.575372

## Sheet: Sp7(SC)
Source Data for Figure 3A-3D
								PPIA	2015-01-21	SP
								Sp7(Sc)	2015-01-21	SP
10d Femur Head RNA
Tshr+/- NaOH	Sp7(Sc)	PPIA	∆Ct	Tshr-/- NaOH	Sp7(Sc)	PPIA	∆Ct	∆∆Ct	Fold ∆
1	22.0041	15.643	6.36104	1
2	23.6096	16.2212	7.38841	2	23.3289	15.6593	7.66963	0.65185	0.636464
3	22.142	15.8063	6.33568	3	24.5499	16.4132	8.13675	1.11897	0.460422
4	23.5066	16.2288	7.2778	4	24.0076	16.2913	7.71634	0.69856	0.616187			PPIA	Sp7(Sc)
5	23.1435	15.5344	7.60909	5	23.1703	15.8885	7.28181	0.26403	0.832758		Blank	21.9533	34.0076
6	23.324	16.1893	7.13466	6	23.314	15.6534	7.66056	0.64278	0.640478		Blank	22.3755	34.8032
Average	22.9549	15.9372	7.01778	Average	23.6741	15.9811	7.69302	0.675238	0.637262
Median	23.2337	15.9978	7.20623	Median	23.3289	15.8885	7.66963	0.65185	0.636464
SD	0.702809	0.3147	0.541268	SD	0.587576	0.354408	0.30337	0.30337	0.132237
SEM			0.191367				0.107258		0.0591381
	P value
Sp7(Sc)	0.10279
PPIA	0.832274
Ct	0.0355153
Relative Fold	0.957675
Fold Incr	0.626229
Tshr+/- NaOH	Sp7(Sc)	PPIA	∆Ct	Tshr-/- TH	Sp7(Sc)	PPIA	∆Ct	∆∆Ct	Fold ∆
1	22.0041	15.643	6.36104	1	21.4899	15.3772	6.11267	-0.90511	1.87269
2	23.6096	16.2212	7.38841	2
3	22.142	15.8063	6.33568	3	21.8624	15.4107	6.45173	-0.56605	1.48046
4	23.5066	16.2288	7.2778	4	21.9429	15.5384	6.4045	-0.61328	1.52973
5	23.1435	15.5344	7.60909	5	21.8436	15.2593	6.58422	-0.43356	1.35056
6	23.324	16.1893	7.13466	6
Average	22.9549	15.9372	7.01778	Average	21.7847	15.3964	6.38828	-0.6295	1.55836
Median	23.2337	15.9978	7.20623	Median	21.853	15.394	6.42811	-0.589665	1.5051
SD	0.702809	0.3147	0.541268	SD	0.201213	0.114772	0.198865	0.198865	0.222762
SEM			0.191367				0.0703095		0.111381
	P value
Sp7(Sc)	0.01289
PPIA	0.011872
Ct	0.0597357
Relative Fold	0.185446
Fold Incr	1.54703
Tshr-/- NaOH	Sp7(Sc)	PPIA	∆Ct	Tshr-/- TH	Sp7(Sc)	PPIA	∆Ct	∆∆Ct	Fold ∆
1				1	21.4899	15.3772	6.11267	-1.58035	2.99042
2	23.3289	15.6593	7.66963	2
3	24.5499	16.4132	8.13675	3	21.8624	15.4107	6.45173	-1.24129	2.36409
4	24.0076	16.2913	7.71634	4	21.9429	15.5384	6.4045	-1.28852	2.44277
5	23.1703	15.8885	7.28181	5	21.8436	15.2593	6.58422	-1.1088	2.15666
6	23.314	15.6534	7.66056	6
Average	23.6741	15.9811	7.69302	Average	21.7847	15.3964	6.38828	-1.30474	2.48849
Median	23.3289	15.8885	7.66963	Median	21.853	15.394	6.42811	-1.2649	2.40343
SD	0.587576	0.354408	0.30337	SD	0.201213	0.114772	0.198865	0.198865	0.35572
SEM			0.107258				0.0703095		0.17786
	P value
Sp7(Sc)	0.000501061
PPIA	0.0165505
Ct	0.000152552
Relative Fold	1.22295
Fold Incr	2.47039
10D SOC RNA
Tshr+/- NaOH	Sp7(Sc)	PPIA	∆Ct	Tshr-/- NaOH	Sp7(Sc)	PPIA	∆Ct	∆∆Ct	Fold ∆
1				1
2				2	23.322	15.9073	7.41471	1.72993	0.301467
3	21.0058	15.7971	5.20874	3	23.1171	16.5529	6.5642	0.879423	0.543585
4	21.5627	15.8616	5.7011	4	23.0998	15.9575	7.14223	1.45745	0.364136
5	21.5354	15.6583	5.87707	5	22.9309	16.2989	6.63201	0.947231	0.518627
6	21.7201	15.7679	5.95221	6	22.3397	15.7494	6.59031	0.905529	0.533837
Average	21.456	15.7712	5.68478	Average	22.9619	16.0932	6.86869	1.18391	0.45233			PPIA	OSX
Median	21.5491	15.7825	5.78908	Median	23.0998	15.9575	6.63201	0.947231	0.518627		Blank	14.4745	23.4326
SD	0.310988	0.0848256	0.334352	SD	0.37445	0.325878	0.387036	0.387036	0.111696		Uni	23.0087	23.6996
SEM			0.167176				0.173088		0.049952
	P value
Sp7(Sc)	0.000354163
PPIA	0.0991033
Ct	0.00189919
Relative Fold	2.46788
Fold Incr	0.440156
Tshr+/- NaOH	Sp7(Sc)	PPIA	∆Ct	Tshr-/- TH	Sp7(Sc)	PPIA	∆Ct	∆∆Ct	Fold ∆
1				1	21.882	16.3816	5.50033	-0.184445	1.13638
2				2	21.694	16.3476	5.34637	-0.338412	1.26436
3	21.0058	15.7971	5.20874	3
4	21.5627	15.8616	5.7011	4	22.432	16.7764	5.65568	-0.0291026	1.02038
5	21.5354	15.6583	5.87707	5	21.5314	16.1172	5.41425	-0.270533	1.20625
6	21.7201	15.7679	5.95221	6	21.9368	16.2963	5.64057	-0.0442088	1.03112
Average	21.456	15.7712	5.68478	Average	21.8953	16.3838	5.51144	-0.17334	1.1317
Median	21.5491	15.7825	5.78908	Median	21.882	16.3476	5.50033	-0.184445	1.13638
SD	0.310988	0.0848256	0.334352	SD	0.340191	0.24195	0.136288	0.136288	0.106875
SEM			0.167176				0.0609499		0.0477961
	P value
Sp7(Sc)	0.0860837
PPIA	0.00201802
Ct	0.320908
Relative Fold	0.00137286
Fold Incr	1.12767
Tshr-/- NaOH	Sp7(Sc)	PPIA	∆Ct	Tshr-/- TH	Sp7(Sc)	PPIA	∆Ct	∆∆Ct	Fold ∆
1				1	21.882	16.3816	5.50033	-1.36836	2.58176
2	23.322	15.9073	7.41471	2	21.694	16.3476	5.34637	-1.52232	2.87253
3	23.1171	16.5529	6.5642	3
4	23.0998	15.9575	7.14223	4	22.432	16.7764	5.65568	-1.21302	2.31822
5	22.9309	16.2989	6.63201	5	21.5314	16.1172	5.41425	-1.45445	2.74051
6	22.3397	15.7494	6.59031	6	21.9368	16.2963	5.64057	-1.22812	2.34262
Average	22.9619	16.0932	6.86869	Average	21.8953	16.3838	5.51144	-1.35725	2.57113
Median	23.0998	15.9575	6.63201	Median	21.882	16.3476	5.50033	-1.36836	2.58176
SD	0.37445	0.325878	0.387036	SD	0.340191	0.24195	0.136288	0.136288	0.242812
SEM			0.173088				0.0609499		0.108589
	P value
Sp7(Sc)	0.00151293
PPIA	0.148036
Ct	7.6469e-05
Relative Fold	1.49076
Fold Incr	2.56197

## Sheet: Hif1a
Source Data for Figure 3A-3D
							CA	2015-05-07	PPIA
							CA	2015-06-26
10d Femur Head RNA
Tshr+/- NaOH	Hif1a	PPIA	∆Ct	Tshr-/- NaOH	Hif1a	PPIA	∆Ct	∆∆Ct	Fold ∆
1	20.3214	15.5834	4.73805	1
2				2	20.8284	15.6808	5.14758	0.277835	0.824828
3	20.8354	15.6712	5.16422	3	20.8788	16.3774	4.50139	-0.368355	1.29088
4	20.9849	15.9991	4.98582	4	20.9324	16.341	4.59136	-0.278385	1.21284			PPIA	Hif1a
5	20.1111	15.5202	4.59089	5	20.5947	15.913	4.68171	-0.188035	1.13921		Blank	21.9672	Undetermined
6				6	20.7329	15.6391	5.09375	0.224005	0.856185		Blank		Undetermined
Average	20.5632	15.6934	4.86974	Average	20.7934	15.9903	4.80316	-0.066587	1.06479
Median	20.5784	15.6273	4.86193	Median	20.8284	15.913	4.68171	-0.188035	1.13921
SD	0.414233	0.21294	0.255142	SD	0.133201	0.35284	0.297381	0.297381	0.211938
SEM			0.0902064				0.10514		0.0749314
	P value
Hif1a	0.274108
PPIA	0.184943
Ct	0.733453
Relative Fold	0.0532659
Fold Incr	1.04724
Tshr+/- NaOH	Hif1a	PPIA	∆Ct	Tshr-/- TH	Hif1a	PPIA	∆Ct	∆∆Ct	Fold ∆
1	20.3214	15.5834	4.73805	1	20.5462	15.3197	5.22653	0.356785	0.780903
2				2	20.6323	15.4366	5.19571	0.325965	0.797765
3	20.8354	15.6712	5.16422	3	20.7307	15.3524	5.37834	0.508595	0.702907
4	20.9849	15.9991	4.98582	4	20.8689	15.4735	5.3954	0.525655	0.694644
5	20.1111	15.5202	4.59089	5	20.538	15.2478	5.29021	0.420465	0.747184
6				6
Average	20.5632	15.6934	4.86974	Average	20.6632	15.366	5.29724	0.427493	0.74468
Median	20.5784	15.6273	4.86193	Median	20.6323	15.3524	5.29021	0.420465	0.747184
SD	0.414233	0.21294	0.255142	SD	0.138897	0.0906104	0.0888401	0.0888401	0.0457848
SEM			0.0902064				0.0314097		0.0161874
	P value
Hif1a	0.623787
PPIA	0.0163198
Ct	0.00947123
Relative Fold	0.2666
Fold Incr	0.743553
Tshr-/- NaOH	Hif1a	PPIA	∆Ct	Tshr-/- TH	Hif1a	PPIA	∆Ct	∆∆Ct	Fold ∆
1				1	20.5462	15.3197	5.22653	0.423372	0.74568
2	20.8284	15.6808	5.14758	2	20.6323	15.4366	5.19571	0.392552	0.761781
3	20.8788	16.3774	4.50139	3	20.7307	15.3524	5.37834	0.575182	0.671202
4	20.9324	16.341	4.59136	4	20.8689	15.4735	5.3954	0.592242	0.663311
5	20.5947	15.913	4.68171	5	20.538	15.2478	5.29021	0.487052	0.713482
6	20.7329	15.6391	5.09375	6
Average	20.7934	15.9903	4.80316	Average	20.6632	15.366	5.29724	0.49408	0.711091
Median	20.8284	15.913	4.68171	Median	20.6323	15.3524	5.29021	0.487052	0.713482
SD	0.133201	0.35284	0.297381	SD	0.138897	0.0906104	0.0888401	0.0888401	0.0437196
SEM			0.10514				0.0314097		0.0154572
	P value
Hif1a	0.168806
PPIA	0.00500456
Ct	0.00740463
Relative Fold	0.339796
Fold Incr	0.710014
10D SOC RNA
Tshr+/- NaOH	Hif1a	PPIA	∆Ct	Tshr-/- NaOH	Hif1a	PPIA	∆Ct	∆∆Ct	Fold ∆
1	19.9424	15.653	4.28946	1
2	19.641	15.6481	3.99288	2	19.3236	15.8013	3.5223	-0.38254	1.30364
3	19.2147	15.7194	3.49532	3	19.7019	15.9434	3.75858	-0.14626	1.1067
4	19.1282	15.6593	3.4689	4	19.7731	16.1303	3.64274	-0.2621	1.19922
5	19.5091	15.5524	3.95667	5	19.5594	15.7514	3.808	-0.09684	1.06943
6	19.9372	15.7113	4.22581	6	19.7177	15.8148	3.90295	-0.00189	1.00131			PPIA
Average	19.5621	15.6572	3.90484	Average	19.6151	15.8882	3.72691	-0.177926	1.13606		blank	24.8398	Undetermined
Median	19.575	15.6561	3.97478	Median	19.7019	15.8148	3.75858	-0.14626	1.1067		blank	24.9985	Undetermined
SD	0.347372	0.0598084	0.351893	SD	0.181052	0.152756	0.147918	0.147918	0.117824
SEM			0.14366				0.0603871		0.0481016
	P value
Hif1a	0.766037
PPIA	0.00749214
Ct	0.321694
Relative Fold	0.000900502
Fold Incr	1.13126
Tshr+/- NaOH	Hif1a	PPIA	∆Ct	Tshr-/- TH	Hif1a	PPIA	∆Ct	∆∆Ct	Fold ∆
1	19.9424	15.653	4.28946	1	19.5364	15.2357	4.30073	0.39589	0.76002
2	19.641	15.6481	3.99288	2	19.4546	15.4839	3.97068	0.06584	0.955389
3	19.2147	15.7194	3.49532	3	19.6469	15.5028	4.14404	0.2392	0.847215
4	19.1282	15.6593	3.4689	4	19.7273	15.7582	3.96914	0.0643	0.956409
5	19.5091	15.5524	3.95667	5	19.966	15.6947	4.27131	0.36647	0.775678
6	19.9372	15.7113	4.22581	6	20.1595	15.7903	4.3692	0.46436	0.724793
Average	19.5621	15.6572	3.90484	Average	19.7485	15.5776	4.17085	0.26601	0.836584
Median	19.575	15.6561	3.97478	Median	19.6871	15.5988	4.20768	0.302835	0.811447
SD	0.347372	0.0598084	0.351893	SD	0.26774	0.21111	0.171917	0.171917	0.100652
SEM			0.14366				0.0701849		0.0410912
	P value
Hif1a	0.322456
PPIA	0.394814
Ct	0.127141
Relative Fold	0.19178
Fold Incr	0.831616
Tshr-/- NaOH	Hif1a	PPIA	∆Ct	Tshr-/- TH	Hif1a	PPIA	∆Ct	∆∆Ct	Fold ∆
1				1	19.5364	15.2357	4.30073	0.573816	0.671837
2	19.3236	15.8013	3.5223	2	19.4546	15.4839	3.97068	0.243766	0.844538
3	19.7019	15.9434	3.75858	3	19.6469	15.5028	4.14404	0.417126	0.748915
4	19.7731	16.1303	3.64274	4	19.7273	15.7582	3.96914	0.242226	0.84544
5	19.5594	15.7514	3.808	5	19.966	15.6947	4.27131	0.544396	0.685678
6	19.7177	15.8148	3.90295	6	20.1595	15.7903	4.3692	0.642286	0.640697
Average	19.6151	15.8882	3.72691	Average	19.7485	15.5776	4.17085	0.443936	0.739518
Median	19.7019	15.8148	3.75858	Median	19.6871	15.5988	4.20768	0.480761	0.717297
SD	0.181052	0.152756	0.147918	SD	0.26774	0.21111	0.171917	0.171917	0.088974
SEM			0.0603871				0.0701849		0.0363235
	P value
Hif1a	0.369849
PPIA	0.0229629
Ct	0.00141768
Relative Fold	0.379275
Fold Incr	0.735126

[truncated: 9 more sheets: Epas1, Col2a1, Col10a1, Ibsp, Spp1, Mgp, Mmp13, Alpl, Acp5]
