# Supplementary material for: Differences in pathways contributing to thyroid hormone effects on postnatal cartilage calcification versus secondary ossification center development
Source: eLife. 2022 Jan 31;11:e76730. doi: 10.7554/eLife.76730 (PMC8830887; doi:10.7554/eLife.76730)
Supplement: Figure 3—source data 2. — Reverse transcriptase quantitative polymerase chain reaction (RT-qPCR) data for day 21 Tshr femur head (FH) and distal femur (DF). Average fold changes plotted and t-test values are highlighted in yellow. [file elife-76730-fig3-data2.xlsx]

## Sheet: Shh
Source Data for Figure 3E-3H
							CA	PPIA	2014-10-29
Hyt 21D Femur Heads
Tshr+/- NaOH	SHH	PPIA	∆Ct	Tshr-/- NaOH	SHH	PPIA	∆Ct	∆∆Ct	Fold ∆
171	25.3231	15.724	9.59909	184	25.8768	15.424	10.4528	1.10695	0.464276
172	25.2529	15.6912	9.56165	185	25.8227	15.71	10.1127	0.766832	0.587707
174	24.8787	15.5933	9.28537	187	26.3475	15.7844	10.5631	1.21725	0.430101
179	26.4157	16.6952	9.72048	188	26.12	15.5279	10.5921	1.24622	0.421551
180	25.4008	15.5043	9.89654	206
181	24.8495	16.2536	8.59587	207	26.5433	15.5467	10.9966	1.65071	0.318484			PPIA	SHH
182				210	25.7718	15.691	10.0808	0.734929	0.600848		Blank	22.8775	29.2301
183	24.4565	15.6944	8.76214	211	26.4495	15.8159	10.6336	1.28771	0.409601		Blank	22.6954	27.3783
Average	25.2253	15.8794	9.34588	Average	26.1331	15.6429	10.4902	1.14437	0.461795
Median	25.2529	15.6944	9.56165	Median	26.12	15.691	10.5631	1.21725	0.430101
SD	0.62057	0.432434	0.493481	SD	0.318092	0.145596	0.31733	0.31733	0.100898
SEM			0.186518				0.0956785		0.0304218
	P value
SHH	0.00485689
PPIA	0.195223
Ct	0.000236815
Relative Fold	2.13657
Fold Incr	0.452387
Tshr+/- NaOH	SHH	PPIA	∆Ct	Tshr-/- TH	SHH	PPIA	∆Ct	∆∆Ct	Fold ∆
171	25.3231	15.724	9.59909	175	25.1238	16.4399	8.6839	-0.66198	1.58225
172	25.2529	15.6912	9.56165	176	24.6758	15.6155	9.06034	-0.28554	1.21887
174	24.8787	15.5933	9.28537	177
179	26.4157	16.6952	9.72048	216	25.4733	15.975	9.49821	0.152331	0.899795
180	25.4008	15.5043	9.89654	223	25.2653	15.7895	9.47576	0.12988	0.913907
181	24.8495	16.2536	8.59587	229
182
183	24.4565	15.6944	8.76214
Average	25.2253	15.8794	9.34588	Average	25.1345	15.955	9.17955	-0.166327	1.15371
Median	25.2529	15.6944	9.56165	Median	25.1945	15.8823	9.26805	-0.0778298	1.06639
SD	0.62057	0.432434	0.493481	SD	0.337817	0.35503	0.386939	0.386939	0.321389
SEM			0.186518				0.116667		0.0969024
	P value
SHH	0.795656
PPIA	0.774527
Ct	0.578738
Relative Fold	0.0486696
Fold Incr	1.1222
Tshr-/- NaOH	SHH	PPIA	∆Ct	Tshr-/- TH	SHH	PPIA	∆Ct	∆∆Ct	Fold ∆
184	25.8768	15.424	10.4528	175	25.1238	16.4399	8.6839	-1.80635	3.49757
185	25.8227	15.71	10.1127	176	24.6758	15.6155	9.06034	-1.42991	2.6943
187	26.3475	15.7844	10.5631	177
188	26.12	15.5279	10.5921	216	25.4733	15.975	9.49821	-0.99204	1.989
206				223	25.2653	15.7895	9.47576	-1.01449	2.02019
207	26.5433	15.5467	10.9966	229
210	25.7718	15.691	10.0808
211	26.4495	15.8159	10.6336
Average	26.1331	15.6429	10.4902	Average	25.1345	15.955	9.17955	-1.3107	2.55026
Median	26.12	15.691	10.5631	Median	25.1945	15.8823	9.26805	-1.2222	2.35725
SD	0.318092	0.145596	0.31733	SD	0.337817	0.35503	0.386939	0.386939	0.710429
SEM			0.119939				0.116667		0.214202
	P value
SHH	0.000841743
PPIA	0.0649497
Ct	0.000176546
Relative Fold	0.853331
Fold Incr	2.48062
Hyt 21D SBglap2
Tshr+/- NaOH	SHH	PPIA	∆Ct	Tshr-/- NaOH	SHH	PPIA	∆Ct	∆∆Ct	Fold ∆
171	24.6981	14.9188	9.77927	183	24.8613	15.0177	9.84366	0.039692	0.972863
172	24.5082	14.965	9.54319	185	25.2533	15.7346	9.5187	-0.285268	1.21864
174	24.6516	14.9346	9.71702	187	26.0385	15.4436	10.5949	0.790902	0.577983
179	24.1974	14.7284	9.46901	188	26.2186	16.2821	9.93649	0.132522	0.912235
180	26.015	15.4164	10.5986	206	25.3254	14.9129	10.4125	0.608492	0.655882
181	24.7812	14.7369	10.0443	207								PPIA	SHH
182				210	26.361	15.1275	11.2335	1.42957	0.371241		Blank	21.7498	29.987
183	24.5966	15.1202	9.47642	211							Blank	22.6954
Average	24.7783	14.9743	9.80397	Average	25.6764	15.4197	10.2566	0.452652	0.784807
Median	24.6516	14.9346	9.71702	Median	25.6819	15.2856	10.1745	0.370507	0.784059
SD	0.576682	0.237452	0.405138	SD	0.609977	0.519091	0.618161	0.618161	0.306674
SEM			0.153128				0.186383		0.0924658
	P value
SHH	0.0197013
PPIA	0.0655126
Ct	0.141085
Relative Fold	1.14664
Fold Incr	0.730698
Tshr+/- NaOH	SHH	PPIA	∆Ct	Tshr-/- TH	SHH	PPIA	∆Ct	∆∆Ct	Fold ∆
171	24.6981	14.9188	9.77927	175	24.5738	14.9972	9.57661	-0.227358	1.17069
172	24.5082	14.965	9.54319	176	23.7454	14.7946	8.95083	-0.853138	1.80643
174	24.6516	14.9346	9.71702	177	24.223	14.9543	9.26868	-0.535288	1.44923
179	24.1974	14.7284	9.46901	216	24.728	14.959	9.76901	-0.034958	1.02453
180	26.015	15.4164	10.5986	223	25.0015	15.1871	9.81435	0.010382	0.99283
181	24.7812	14.7369	10.0443	225	24.9329	15.2217	9.71124	-0.092728	1.06638
182				229
183	24.5966	15.1202	9.47642
Average	24.7783	14.9743	9.80397	Average	24.5341	15.019	9.51512	-0.288848	1.25168
Median	24.6516	14.9346	9.71702	Median	24.6509	14.9781	9.64392	-0.160043	1.11854
SD	0.576682	0.237452	0.405138	SD	0.476556	0.15999	0.339234	0.339234	0.318203
SEM			0.153128				0.102283		0.0959418
	P value
SHH	0.428139
PPIA	0.704118
Ct	0.19542
Relative Fold	0.00253876
Fold Incr	1.22166
Tshr-/- NaOH	SHH	PPIA	∆Ct	Tshr-/- TH	SHH	PPIA	∆Ct	∆∆Ct	Fold ∆
184	24.8613	15.0177	9.84366	175	24.5738	14.9972	9.57661	-0.68001	1.60215
185	25.2533	15.7346	9.5187	176	23.7454	14.7946	8.95083	-1.30579	2.47219
187	26.0385	15.4436	10.5949	177	24.223	14.9543	9.26868	-0.98794	1.98335
188	26.2186	16.2821	9.93649	216	24.728	14.959	9.76901	-0.48761	1.40212
206	25.3254	14.9129	10.4125	223	25.0015	15.1871	9.81435	-0.44227	1.35874
207				225	24.9329	15.2217	9.71124	-0.54538	1.4594
210	26.361	15.1275	11.2335	229
211
Average	25.6764	15.4197	10.2566	Average	24.5341	15.019	9.51512	-0.7415	1.71299
Median	25.6819	15.2856	10.1745	Median	24.6509	14.9781	9.64392	-0.612695	1.53078
SD	0.609977	0.519091	0.618161	SD	0.476556	0.15999	0.339234	0.339234	0.435478
SEM			0.233643				0.102283		0.131301
	P value
SHH	0.00473158
PPIA	0.100855
Ct	0.0276124
Relative Fold	0.161818
Fold Incr	1.67191

## Sheet: Ihh
Source Data for Figure 3E-3H
							CA	PPIA	2014-10-29
Hyt 21D Femur Heads
Tshr+/- NaOH	IHH	PPIA	∆Ct	Tshr-/- NaOH	IHH	PPIA	∆Ct	∆∆Ct	Fold ∆
171	20.4111	15.724	4.68709	184	19.3745	15.424	3.95058	-0.479955	1.3947
172	19.9857	15.6912	4.29448	185	19.7435	15.71	4.03348	-0.397051	1.31681
174	20.3873	15.5933	4.794	187	19.9884	15.7844	4.20396	-0.226576	1.17005
179				188	19.9303	15.5279	4.40241	-0.0281189	1.01968
180	19.9619	15.5043	4.45769	206
181				207	19.2786	15.5467	3.73189	-0.698646	1.62298			PPIA	IHH
182	20.3222	16.1729	4.1493	210	19.339	15.691	3.64799	-0.782542	1.72016		Blank	22.8775	30.9207
183	19.895	15.6944	4.20064	211	19.9602	15.8159	4.14429	-0.286244	1.21946		Blank	22.6954
Average	20.1605	15.73	4.43053	Average	19.6592	15.6429	4.01637	-0.414162	1.35198
Median	20.154	15.6928	4.37608	Median	19.7435	15.691	4.03348	-0.397051	1.31681
SD	0.237009	0.23178	0.264243	SD	0.318316	0.145596	0.265153	0.265153	0.249379
SEM			0.0998744				0.0799467		0.0751906
	P value
IHH	0.00891813
PPIA	0.426389
Ct	0.0169102
Relative Fold	0.0222035
Fold Incr	1.33252
Tshr+/- NaOH	IHH	PPIA	∆Ct	Tshr-/- TH	IHH	PPIA	∆Ct	∆∆Ct	Fold ∆
171	20.4111	15.724	4.68709	175	21.2792	16.4399	4.83937	0.408835	0.753232
172	19.9857	15.6912	4.29448	176	19.9554	15.6155	4.33993	-0.0906008	1.06481
174	20.3873	15.5933	4.794	177	19.5145	15.2952	4.21931	-0.211226	1.15767
179				216	20.1504	15.975	4.1754	-0.255133	1.19345
180	19.9619	15.5043	4.45769	223
181				229	19.767	15.5227	4.24426	-0.18627	1.13782
182	20.3222	16.1729	4.1493
183	19.895	15.6944	4.20064
Average	20.1605	15.73	4.43053	Average	20.1333	15.7697	4.36365	-0.0668791	1.0614
Median	20.154	15.6928	4.37608	Median	19.9554	15.6155	4.24426	-0.18627	1.13782
SD	0.237009	0.23178	0.264243	SD	0.682309	0.447553	0.27267	0.27267	0.178552
SEM			0.0998744				0.0822132		0.0538355
	P value
IHH	0.928583
PPIA	0.853605
Ct	0.68992
Relative Fold	0.04235
Fold Incr	1.04745
Tshr-/- NaOH	IHH	PPIA	∆Ct	Tshr-/- TH	IHH	PPIA	∆Ct	∆∆Ct	Fold ∆
184	19.3745	15.424	3.95058	175	21.2792	16.4399	4.83937	0.822996	0.565267
185	19.7435	15.71	4.03348	176	19.9554	15.6155	4.33993	0.323561	0.799095
187	19.9884	15.7844	4.20396	177	19.5145	15.2952	4.21931	0.202935	0.868781
188	19.9303	15.5279	4.40241	216	20.1504	15.975	4.1754	0.159028	0.895628
206				223
207	19.2786	15.5467	3.73189	229	19.767	15.5227	4.24426	0.227892	0.853882
210	19.339	15.691	3.64799
211	19.9602	15.8159	4.14429
	19.6592	15.6429	4.01637	Average	20.1333	15.7697	4.36365	0.347283	0.79653
Median	19.7435	15.691	4.03348	Median	19.9554	15.6155	4.24426	0.227892	0.853882
SD	0.318316	0.145596	0.265153	SD	0.682309	0.447553	0.27267	0.27267	0.133995
SEM			0.100219				0.0822132		0.0404012
	P value
IHH	0.134349
PPIA	0.493476
Ct	0.0514278
Relative Fold	0.384342
Fold Incr	0.786063
Hyt 21D SBglap2
Tshr+/- NaOH	IHH	PPIA	∆Ct	Tshr-/- NaOH	IHH	PPIA	∆Ct	∆∆Ct	Fold ∆
171	21.284	14.9188	6.36522	183
172	21.3334	14.965	6.36845	185
174	20.7772	14.9346	5.84267	187	20.6253	15.4436	5.18166	-0.947481	1.9285
179	20.8173	14.7284	6.08894	188	22.2195	16.2821	5.93743	-0.191711	1.14212
180				206	19.6846	14.9129	4.77165	-1.35749	2.56239
181	20.698	14.7369	5.96107	207	20.9981	15.6058	5.39233	-0.736811	1.66649			PPIA	IHH
182				210	20.3072	15.1275	5.17969	-0.949451	1.93114		Blank	21.7498	28.9351
183	21.2687	15.1202	6.1485	211							Blank
Average	21.0298	14.9006	6.12914	Average	20.7669	15.4744	5.29255	-0.836589	1.84613
Median	21.043	14.9267	6.11872	Median	20.6253	15.4436	5.18166	-0.947481	1.9285
SD	0.294237	0.148509	0.212277	SD	0.944237	0.525866	0.424911	0.424911	0.513553
SEM			0.0802332				0.128115		0.154842
	P value
IHH	0.531204
PPIA	0.0298294
Ct	0.00211733
Relative Fold	0.169479
Fold Incr	1.78582
Tshr+/- NaOH	IHH	PPIA	∆Ct	Tshr-/- TH	IHH	PPIA	∆Ct	∆∆Ct	Fold ∆
171	21.284	14.9188	6.36522	175
172	21.3334	14.965	6.36845	176	20.9062	14.7946	6.11158	-0.017561	1.01225
174	20.7772	14.9346	5.84267	177	20.7889	14.9543	5.83466	-0.294481	1.22644
179	20.8173	14.7284	6.08894	216	20.9315	14.959	5.9725	-0.156641	1.11469
180				223
181	20.698	14.7369	5.96107	225	21.5555	15.2217	6.33382	0.204679	0.867732
182				229	21.1268	14.8148	6.31202	0.182879	0.880943
183	21.2687	15.1202	6.1485
Average	21.0298	14.9006	6.12914	Average	21.0618	14.9489	6.11292	-0.016225	1.02041
Median	21.043	14.9267	6.11872	Median	20.9315	14.9543	6.11158	-0.017561	1.01225
SD	0.294237	0.148509	0.212277	SD	0.301515	0.170551	0.215398	0.215398	0.153433
SEM			0.0802332				0.0649451		0.0462618
	P value
IHH	0.862968
PPIA	0.627841
Ct	0.902962
Relative Fold	0.03967
Fold Incr	1.01131
Tshr-/- NaOH	IHH	PPIA	∆Ct	Tshr-/- TH	IHH	PPIA	∆Ct	∆∆Ct	Fold ∆
183				175
185				176	20.9062	14.7946	6.11158	0.819028	0.566824
187	20.6253	15.4436	5.18166	177	20.7889	14.9543	5.83466	0.542108	0.686767
188	22.2195	16.2821	5.93743	216	20.9315	14.959	5.9725	0.679948	0.624188
206	19.6846	14.9129	4.77165	223
207	20.9981	15.6058	5.39233	225	21.5555	15.2217	6.33382	1.04127	0.4859
210	20.3072	15.1275	5.17969	229	21.1268	14.8148	6.31202	1.01947	0.493298
211
	20.7669	15.4744	5.29255	Average	21.0618	14.9489	6.11292	0.820364	0.571395
Median	20.6253	15.4436	5.18166	Median	20.9315	14.9543	6.11158	0.819028	0.566824
SD	0.944237	0.525866	0.424911	SD	0.301515	0.170551	0.215398	0.215398	0.0859172
SEM			0.160601				0.0649451		0.025905
	P value
IHH	0.524675
PPIA	0.0662436
Ct	0.00487325
Relative Fold	1.0728
Fold Incr	0.566299

## Sheet: Tnfsf11
Source Data for Figure 3E-3H
							CA	PPIA	2014-11-17
							CA		2014-11-17
Hyt 21D Femur Heads
Tshr+/- NaOH	Tnfsf11	PPIA	∆Ct	Tshr-/- NaOH	Tnfsf11	PPIA	∆Ct	∆∆Ct	Fold ∆
171	24.3632	16.1772	8.18606	184	23.5673	15.5928	7.97453	-0.0132683	1.00924
172	23.9146	15.8431	8.0715	185	23.7338	15.8432	7.89055	-0.0972483	1.06973
174	23.9611	15.7489	8.21224	187	23.9191	15.9084	8.01076	0.0229617	0.98421
179	24.4448	17.0144	7.43039	188	23.78	15.8579	7.92214	-0.0656583	1.04656
180	23.8092	15.7317	8.0775	206
181				207	23.5614	15.9207	7.64069	-0.347108	1.27201			PPIA	Tnfsf11
182				210							Blank	23.4499	28.233
183	23.7716	15.8225	7.9491	211	24.127	16.1354	7.99164	0.00384167	0.997341		Blank
Average	24.0441	16.0563	7.9878	Average	23.7814	15.8764	7.90505	-0.0827467	1.06318
Median	23.9379	15.8328	8.0745	Median	23.7569	15.8831	7.94834	-0.0394633	1.0279
SD	0.288271	0.4965	0.288768	SD	0.216772	0.174326	0.137032	0.137032	0.107153
SEM			0.109144				0.0413166		0.0323079
	P value
	0.104793
PPIA	0.421919
Ct	0.540232
Relative Fold	0.00294686
Fold Incr	1.05903
Tshr+/- NaOH	Tnfsf11	PPIA	∆Ct	Tshr-/- TH	Tnfsf11	PPIA	∆Ct	∆∆Ct	Fold ∆
171	24.3632	16.1772	8.18606	175	24.8941	17.1985	7.69566	-0.292138	1.22445
172	23.9146	15.8431	8.0715	176	23.0088	15.7617	7.24715	-0.740648	1.67093
174	23.9611	15.7489	8.21224	177	22.5027	15.3966	7.10612	-0.881678	1.84252
179	24.4448	17.0144	7.43039	216
180	23.8092	15.7317	8.0775	223	23.7762	15.9666	7.8096	-0.178198	1.13147
181				229	23.261	15.6959	7.56514	-0.422658	1.3404
182
183	23.7716	15.8225	7.9491
Average	24.0441	16.0563	7.9878	Average	23.4886	16.0038	7.48473	-0.503064	1.44195
Median	23.9379	15.8328	8.0745	Median	23.261	15.7617	7.56514	-0.422658	1.3404
SD	0.288271	0.4965	0.288768	SD	0.909958	0.698337	0.298449	0.298449	0.302862
SEM			0.109144				0.0899858		0.0913162
	P value
	0.187774
PPIA	0.887453
Ct	0.0195822
Relative Fold	0.0418674
Fold Incr	1.41722
Tshr-/- NaOH	Tnfsf11	PPIA	∆Ct	Tshr-/- TH	Tnfsf11	PPIA	∆Ct	∆∆Ct	Fold ∆
184	23.5673	15.5928	7.97453	175	24.8941	17.1985	7.69566	-0.209392	1.1562
185	23.7338	15.8432	7.89055	176	23.0088	15.7617	7.24715	-0.657902	1.57779
187	23.9191	15.9084	8.01076	177	22.5027	15.3966	7.10612	-0.798932	1.73981
188	23.78	15.8579	7.92214	216
206				223	23.7762	15.9666	7.8096	-0.0954517	1.0684
207	23.5614	15.9207	7.64069	229	23.261	15.6959	7.56514	-0.339912	1.26568
210
211	24.127	16.1354	7.99164
	23.7814	15.8764	7.90505	Average	23.4886	16.0038	7.48473	-0.420318	1.36158
Median	23.7569	15.8831	7.94834	Median	23.261	15.7617	7.56514	-0.339912	1.26568
SD	0.216772	0.174326	0.137032	SD	0.909958	0.698337	0.298449	0.298449	0.285979
SEM			0.0517931				0.0899858		0.0862261
	P value
	0.460828
PPIA	0.673442
Ct	0.0126479
Relative Fold	0.0148519
Fold Incr	1.33822
Hyt 21D SBglap2
Tshr+/- NaOH	Tnfsf11	PPIA	∆Ct	Tshr-/- NaOH	Tnfsf11	PPIA	∆Ct	∆∆Ct	Fold ∆
171	22.7441	14.9934	7.75076	183	22.8333	15.1584	7.67494	0.275473	0.826179
172	23.3033	15.104	8.19927	185	23.7336	15.8911	7.84246	0.442993	0.735607
174	21.8181	14.8197	6.99842	187	23.0678	15.4404	7.6274	0.227933	0.853857
179	21.8367	14.7327	7.10391	188	24.188	16.4019	7.78615	0.386683	0.764886
180	22.3832	15.304	7.07917	206
181				207	22.8577	15.6225	7.23515	-0.164317	1.12064			PPIA	Tnfsf11
182	22.656	15.0817	7.57438	210	22.774	15.1199	7.65413	0.254663	0.838183		Blank	23.4499	28.233
183	22.4234	15.3331	7.09036	211	23.5415	16.2721	7.26939	-0.130077	1.09435		Blank
Average	22.4521	15.0527	7.39947	Average	23.2851	15.7009	7.58423	0.184764	0.890529
Median	22.4234	15.0817	7.10391	Median	23.0678	15.6225	7.65413	0.254663	0.838183
SD	0.522438	0.225612	0.454609	SD	0.54427	0.509859	0.23924	0.23924	0.154113
SEM			0.171826				0.0721334		0.0464669
	P value
Tnfsf11	0.0128098
PPIA	0.009607
Ct	0.360086
Relative Fold	0.179779
Fold Incr	0.879793
Tshr+/- NaOH	Tnfsf11	PPIA	∆Ct	Tshr-/- TH	Tnfsf11	PPIA	∆Ct	∆∆Ct	Fold ∆
171	22.7441	14.9934	7.75076	175	22.593	14.9613	7.63176	0.232293	0.851281
172	23.3033	15.104	8.19927	176	22.5621	14.9267	7.63542	0.235953	0.849124
174	21.8181	14.8197	6.99842	177	22.8361	15.1007	7.73536	0.335893	0.792294
179	21.8367	14.7327	7.10391	216	22.6697	15.1509	7.51872	0.119253	0.920664
180	22.3832	15.304	7.07917	223
181				225	23.2756	15.2916	7.98394	0.584473	0.666893
182	22.656	15.0817	7.57438	229	22.3083	14.7364	7.57191	0.172443	0.887339
183	22.4234	15.3331	7.09036
Average	22.4521	15.0527	7.39947	Average	22.7075	15.0279	7.67952	0.280051	0.827932
Median	22.4234	15.0817	7.10391	Median	22.6313	15.031	7.63359	0.234123	0.850202
SD	0.522438	0.225612	0.454609	SD	0.326884	0.194757	0.165802	0.165802	0.0898069
SEM			0.171826				0.0499913		0.0270778
	P value
Tnfsf11	0.323853
PPIA	0.837932
Ct	0.18262
Relative Fold	0.198785
Fold Incr	0.823562
Tshr-/- NaOH	Tnfsf11	PPIA	∆Ct	Tshr-/- TH	Tnfsf11	PPIA	∆Ct	∆∆Ct	Fold ∆
184	22.8333	15.1584	7.67494	175	22.593	14.9613	7.63176	0.0475286	0.967592
185	23.7336	15.8911	7.84246	176	22.5621	14.9267	7.63542	0.0511886	0.965141
187	23.0678	15.4404	7.6274	177	22.8361	15.1007	7.73536	0.151129	0.900546
188	24.188	16.4019	7.78615	216	22.6697	15.1509	7.51872	-0.0655114	1.04646
206				223
207	22.8577	15.6225	7.23515	225	23.2756	15.2916	7.98394	0.399709	0.758011
210	22.774	15.1199	7.65413	229	22.3083	14.7364	7.57191	-0.0123214	1.00858
211	23.5415	16.2721	7.26939
	23.2851	15.7009	7.58423	Average	22.7075	15.0279	7.67952	0.0952869	0.941054
Median	23.0678	15.6225	7.65413	Median	22.6313	15.031	7.63359	0.0493586	0.966367
SD	0.54427	0.509859	0.23924	SD	0.326884	0.194757	0.165802	0.165802	0.102077
SEM			0.0904241				0.0499913		0.0307775
	P value
Tnfsf11	0.0446981
PPIA	0.0113852
Ct	0.430084
Relative Fold	0.0681676
Fold Incr	0.936086

## Sheet: Tnfrsf11b
Source Data for Figure 3E-3H
							CA	PPIA	2014-11-17
							CA		2014-11-17
Hyt 21D Femur Heads
Tshr+/- NaOH	Tnfrsf11b	PPIA	∆Ct	Tshr-/- NaOH	Tnfrsf11b	PPIA	∆Ct	∆∆Ct	Fold ∆
171	20.6994	16.1772	4.52229	184	19.6074	15.5928	4.01461	-0.555645	1.46983
172	20.4197	15.8431	4.57666	185
174	20.4466	15.7489	4.69767	187	19.4302	15.9084	3.5218	-1.04845	2.06831
179	21.2918	17.0144	4.27738	188	19.4978	15.8579	3.6399	-0.930355	1.90574
180				206
181				207	19.7306	15.9207	3.80995	-0.760305	1.69385			PPIA	Tnfrsf11b
182	21.6099	16.6989	4.91103	210	19.871	15.9673	3.90367	-0.666585	1.58731		Blank	23.4499	37.9168
183	20.259	15.8225	4.4365	211	19.7399	16.1354	3.60453	-0.965725	1.95304		Blank
Average	20.7877	16.2175	4.57026	Average	19.6461	15.8971	3.74908	-0.821178	1.77968
Median	20.573	16.0101	4.54947	Median	19.669	15.9145	3.72492	-0.84533	1.7998
SD	0.542076	0.52616	0.218344	SD	0.165321	0.176948	0.191092	0.191092	0.232224
SEM			0.0825262				0.0576164		0.0700181
	P value
Tnfrsf11b	0.000592257
PPIA	0.187771
Ct	4.03241e-05
Relative Fold	0.397009
Fold Incr	1.76685
Tshr+/- NaOH	Tnfrsf11b	PPIA	∆Ct	Tshr-/- TH	Tnfrsf11b	PPIA	∆Ct	∆∆Ct	Fold ∆
171	20.6994	16.1772	4.52229	175	21.8754	17.1985	4.67689	0.106635	0.928752
172	20.4197	15.8431	4.57666	176	19.9252	15.7617	4.16358	-0.406675	1.32563
174	20.4466	15.7489	4.69767	177	19.7059	15.3966	4.30926	-0.260995	1.1983
179	21.2918	17.0144	4.27738	216
180				223	20.9576	15.9666	4.99098	0.420725	0.747049
181				229	20.4661	15.6959	4.77023	0.199975	0.870566
182	21.6099	16.6989	4.91103
183	20.259	15.8225	4.4365
Average	20.7877	16.2175	4.57026	Average	20.586	16.0038	4.58219	0.011933	1.01406
Median	20.573	16.0101	4.54947	Median	20.4661	15.7617	4.67689	0.106635	0.928752
SD	0.542076	0.52616	0.218344	SD	0.869779	0.698337	0.339544	0.339544	0.239887
SEM			0.0825262				0.102376		0.0723287
	P value
Tnfrsf11b	0.648635
PPIA	0.576423
Ct	0.945194
Relative Fold	0.123536
Fold Incr	0.991763
Tshr-/- NaOH	Tnfrsf11b	PPIA	∆Ct	Tshr-/- TH	Tnfrsf11b	PPIA	∆Ct	∆∆Ct	Fold ∆
184	19.6074	15.5928	4.01461	175	21.8754	17.1985	4.67689	0.927813	0.525654
185				176	19.9252	15.7617	4.16358	0.414503	0.750278
187	19.4302	15.9084	3.5218	177	19.7059	15.3966	4.30926	0.560183	0.678216
188	19.4978	15.8579	3.6399	216
206				223	20.9576	15.9666	4.99098	1.2419	0.422814
207	19.7306	15.9207	3.80995	229	20.4661	15.6959	4.77023	1.02115	0.492722
210	19.871	15.9673	3.90367
211	19.7399	16.1354	3.60453
	19.6461	15.8971	3.74908	Average	20.586	16.0038	4.58219	0.833111	0.573937
Median	19.669	15.9145	3.72492	Median	20.4661	15.7617	4.67689	0.927813	0.525654
SD	0.165321	0.176948	0.191092	SD	0.869779	0.698337	0.339544	0.339544	0.135771
SEM			0.072226				0.102376		0.0409365
	P value
Tnfrsf11b	0.027884
PPIA	0.723935
Ct	0.000607711
Relative Fold	1.37512
Fold Incr	0.561317
Hyt 21D SBglap2
Tshr+/- NaOH	Tnfrsf11b	PPIA	∆Ct	Tshr-/- NaOH	Tnfrsf11b	PPIA	∆Ct	∆∆Ct	Fold ∆
171	20.5858	14.9934	5.5924	183	20.7543	15.1584	5.59594	-0.00559286	1.00388
172	20.9528	15.104	5.84876	185	20.5713	15.8911	4.68022	-0.921313	1.89384
174	20.4516	14.8197	5.63188	187	20.3884	15.4404	4.94801	-0.653523	1.573
179	19.8452	14.7327	5.11245	188	21.3664	16.4019	4.96449	-0.637043	1.55514
180	20.7035	15.304	5.39951	206	19.9977	14.951	5.04671	-0.554823	1.46899
181	20.6203	14.7973	5.82298	207	20.7234	15.6225	5.10091	-0.500623	1.41482			PPIA	Tnfrsf11b
182	20.8844	15.0817	5.80275	210							Blank	23.4499	37.9168
183				211	21.2389	16.2721	4.96686	-0.634673	1.55259		Blank
Average	20.5777	14.9761	5.60153	Average	20.7201	15.6768	5.04331	-0.558227	1.49461
Median	20.6203	14.9934	5.63188	Median	20.7234	15.6225	4.96686	-0.634673	1.55259
SD	0.366272	0.204526	0.268225	SD	0.472936	0.544724	0.277399	0.277399	0.264697
SEM			0.10138				0.0836391		0.0798092
	P value
Tnfrsf11b	0.540528
PPIA	0.00783413
Ct	0.0024063
Relative Fold	0.0788642
Fold Incr	1.47246
Tshr+/- NaOH	Tnfrsf11b	PPIA	∆Ct	Tshr-/- TH	Tnfrsf11b	PPIA	∆Ct	∆∆Ct	Fold ∆
171	20.5858	14.9934	5.5924	175	20.8185	14.9613	5.8572	0.255667	0.8376
172	20.9528	15.104	5.84876	176	20.2196	14.9267	5.29289	-0.308643	1.23854
174	20.4516	14.8197	5.63188	177	20.8255	15.1007	5.72475	0.123217	0.918138
179	19.8452	14.7327	5.11245	216
180	20.7035	15.304	5.39951	223	20.7553	14.9994	5.75585	0.154317	0.898558
181	20.6203	14.7973	5.82298	225	21.0115	15.2916	5.71993	0.118397	0.921211
182	20.8844	15.0817	5.80275	229	20.158	14.7364	5.42163	-0.179903	1.13281
183
Average	20.5777	14.9761	5.60153	Average	20.6314	15.0027	5.62871	0.0271755	0.991143
Median	20.6203	14.9934	5.63188	Median	20.7869	14.9804	5.72234	0.120807	0.919674
SD	0.366272	0.204526	0.268225	SD	0.353894	0.18521	0.219806	0.219806	0.157253
SEM			0.10138				0.0662741		0.0474137
	P value
Tnfrsf11b	0.793805
PPIA	0.811988
Ct	0.847082
Relative Fold	0.061
Fold Incr	0.98134
Tshr-/- NaOH	Tnfrsf11b	PPIA	∆Ct	Tshr-/- TH	Tnfrsf11b	PPIA	∆Ct	∆∆Ct	Fold ∆
184	20.7543	15.1584	5.59594	175	20.8185	14.9613	5.8572	0.813894	0.568844
185	20.5713	15.8911	4.68022	176	20.2196	14.9267	5.29289	0.249584	0.841139
187	20.3884	15.4404	4.94801	177	20.8255	15.1007	5.72475	0.681444	0.623541
188	21.3664	16.4019	4.96449	216
206	19.9977	14.951	5.04671	223	20.7553	14.9994	5.75585	0.712544	0.610243
207	20.7234	15.6225	5.10091	225	21.0115	15.2916	5.71993	0.676624	0.625627
210				229	20.158	14.7364	5.42163	0.378324	0.769331
211	21.2389	16.2721	4.96686
	20.7201	15.6768	5.04331	Average	20.6314	15.0027	5.62871	0.585403	0.673121
Median	20.7234	15.6225	4.96686	Median	20.7869	14.9804	5.72234	0.679034	0.624584
SD	0.472936	0.544724	0.277399	SD	0.353894	0.18521	0.219806	0.219806	0.106796
SEM			0.104847				0.0662741		0.0322003
	P value
Tnfrsf11b	0.713446
PPIA	0.0150691
Ct	0.00158556
Relative Fold	0.648362
Fold Incr	0.666463

## Sheet: Vegfa
Source Data for Figure 3E-3H
							CA	PPIA	2014-11-17
							CA		2014-11-17
Hyt 21D Femur Heads
Tshr+/- NaOH	Vegfa	PPIA	∆Ct	Tshr-/- NaOH	Vegfa	PPIA	∆Ct	∆∆Ct	Fold ∆
171	22.6365	16.1772	6.45931	184	21.7098	15.5928	6.11702	-0.0893267	1.06387
172	21.7702	15.8431	5.92709	185	22.4955	15.8432	6.65227	0.445923	0.734114
174	22.1264	15.7489	6.37754	187	22.1944	15.9084	6.286	0.0796533	0.946285
179				188	22.1492	15.8579	6.2913	0.0849533	0.942815
180	22.3382	15.7317	6.60649	206
181				207	22.007	15.9207	6.08634	-0.120007	1.08674			PPIA	Vegfa
182	22.7123	16.6989	6.01339	210							Blank	23.4499	Undetermined
183	21.6767	15.8225	5.85426	211	22.2211	16.1354	6.08574	-0.120607	1.08719		Blank
Average	22.21	16.0037	6.20635	Average	22.1295	15.8764	6.25311	0.046765	0.976837
Median	22.2323	15.8328	6.19547	Median	22.1718	15.8831	6.20151	-0.00483667	1.00508
SD	0.432525	0.377076	0.313877	SD	0.260043	0.174326	0.217354	0.217354	0.136263
SEM			0.118634				0.0655348		0.0410847
	P value
Vegfa	0.704031
PPIA	0.47013
Ct	0.770293
Relative Fold	0.069759
Fold Incr	0.968105
Tshr+/- NaOH	Vegfa	PPIA	∆Ct	Tshr-/- TH	Vegfa	PPIA	∆Ct	∆∆Ct	Fold ∆
171	22.6365	16.1772	6.45931	175
172	21.7702	15.8431	5.92709	176	21.557	15.7617	5.79532	-0.411027	1.32963
174	22.1264	15.7489	6.37754	177	21.3138	15.3966	5.91714	-0.289207	1.22197
179				216	22.8	16.581	6.219	0.0126533	0.991268
180	22.3382	15.7317	6.60649	223	22.4086	15.9666	6.44198	0.235633	0.849312
181				229	21.8125	15.6959	6.11662	-0.0897267	1.06417
182	22.7123	16.6989	6.01339
183	21.6767	15.8225	5.85426
Average	22.21	16.0037	6.20635	Average	21.9784	15.8804	6.09801	-0.108335	1.09127
Median	22.2323	15.8328	6.19547	Median	21.8125	15.7617	6.11662	-0.0897267	1.06417
SD	0.432525	0.377076	0.313877	SD	0.61378	0.441709	0.253789	0.253789	0.189194
SEM			0.118634				0.0765203		0.057044
	P value
Vegfa	0.481366
PPIA	0.628811
Ct	0.550843
Relative Fold	0.021157
Fold Incr	1.07798
Tshr-/- NaOH	Vegfa	PPIA	∆Ct	Tshr-/- TH	Vegfa	PPIA	∆Ct	∆∆Ct	Fold ∆
184	21.7098	15.5928	6.11702	175
185	22.4955	15.8432	6.65227	176	21.557	15.7617	5.79532	-0.457792	1.37344
187	22.1944	15.9084	6.286	177	21.3138	15.3966	5.91714	-0.335972	1.26223
188	22.1492	15.8579	6.2913	216	22.8	16.581	6.219	-0.0341117	1.02393
206				223	22.4086	15.9666	6.44198	0.188868	0.877294
207	22.007	15.9207	6.08634	229	21.8125	15.6959	6.11662	-0.136492	1.09923
210
211	22.2211	16.1354	6.08574
	22.1295	15.8764	6.25311	Average	21.9784	15.8804	6.09801	-0.1551	1.12722
Median	22.1718	15.8831	6.20151	Median	21.8125	15.7617	6.11662	-0.136492	1.09923
SD	0.260043	0.174326	0.217354	SD	0.61378	0.441709	0.253789	0.253789	0.195427
SEM			0.0821522				0.0765203		0.0589234
	P value
Vegfa	0.594901
PPIA	0.984178
Ct	0.302598
Relative Fold	0.00973959
Fold Incr	1.1135
Hyt 21D SBglap2
Tshr+/- NaOH	Vegfa	PPIA	∆Ct	Tshr-/- NaOH	Vegfa	PPIA	∆Ct	∆∆Ct	Fold ∆
171	21.8409	14.9934	6.84749	183	21.5729	15.1584	6.41454	-0.214478	1.16028
172	22.1487	15.104	7.04469	185	21.9052	15.8911	6.01413	-0.614888	1.53144
174	21.4098	14.8197	6.59007	187	21.3977	15.4404	5.95733	-0.671688	1.59294
179	20.8863	14.7327	6.15352	188	22.4319	16.4019	6.02996	-0.599058	1.51473
180	21.651	15.304	6.34701	206	21.2725	14.951	6.3215	-0.307518	1.23758
181	21.1593	14.7973	6.362	207	21.7156	15.6225	6.09302	-0.535998	1.44994			PPIA	Vegfa
182	21.855	15.0817	6.77332	210							Blank	23.4499	Undetermined
183	22.2471	15.3331	6.91404	211	22.7521	16.2721	6.48005	-0.148967	1.10878		Blank
Average	21.6498	15.0207	6.62902	Average	21.864	15.6768	6.18722	-0.441799	1.37081
Median	21.746	15.0375	6.6817	Median	21.7156	15.6225	6.09302	-0.535998	1.44994
SD	0.472904	0.227553	0.316457	SD	0.545731	0.544724	0.212865	0.212865	0.196998
SEM			0.11961				0.0641812		0.0593972
	P value
Vegfa	0.42966
PPIA	0.00809363
Ct	0.00812108
Relative Fold	0.0524108
Fold Incr	1.3583
Tshr+/- NaOH	Vegfa	PPIA	∆Ct	Tshr-/- TH	Vegfa	PPIA	∆Ct	∆∆Ct	Fold ∆
171	21.8409	14.9934	6.84749	175	21.731	14.9613	6.76969	0.140672	0.907096
172	22.1487	15.104	7.04469	176	21.2333	14.9267	6.30661	-0.322408	1.25042
174	21.4098	14.8197	6.59007	177	21.711	15.1007	6.6103	-0.0187175	1.01306
179	20.8863	14.7327	6.15352	216
180	21.651	15.304	6.34701	223	21.6334	14.9994	6.63402	0.0050025	0.996539
181	21.1593	14.7973	6.362	225	21.9168	15.2916	6.62517	-0.0038475	1.00267
182	21.855	15.0817	6.77332	229	21.3768	14.7364	6.64042	0.0114025	0.992128
183	22.2471	15.3331	6.91404
Average	21.6498	15.0207	6.62902	Average	21.6004	15.0027	6.5977	-0.0313158	1.02698
Median	21.746	15.0375	6.6817	Median	21.6722	14.9804	6.62959	0.0005775	0.999604
SD	0.472904	0.227553	0.316457	SD	0.251089	0.18521	0.153865	0.153865	0.11595
SEM			0.11961				0.0463919		0.0349601
	P value
Vegfa	0.821283
PPIA	0.87674
Ct	0.82812
Relative Fold	0.0150182
Fold Incr	1.02194
Tshr-/- NaOH	Vegfa	PPIA	∆Ct	Tshr-/- TH	Vegfa	PPIA	∆Ct	∆∆Ct	Fold ∆
184	21.5729	15.1584	6.41454	175	21.731	14.9613	6.76969	0.582471	0.667819
185	21.9052	15.8911	6.01413	176	21.2333	14.9267	6.30661	0.119391	0.920576
187	21.3977	15.4404	5.95733	177	21.711	15.1007	6.6103	0.423081	0.74583
188	22.4319	16.4019	6.02996	216
206	21.2725	14.951	6.3215	223	21.6334	14.9994	6.63402	0.446801	0.733668
207	21.7156	15.6225	6.09302	225	21.9168	15.2916	6.62517	0.437951	0.738182
210				229	21.3768	14.7364	6.64042	0.453201	0.73042
211	22.7521	16.2721	6.48005
	21.864	15.6768	6.18722	Average	21.6004	15.0027	6.5977	0.410483	0.756082
Median	21.7156	15.6225	6.09302	Median	21.6722	14.9804	6.62959	0.442376	0.735925
SD	0.545731	0.544724	0.212865	SD	0.251089	0.18521	0.153865	0.153865	0.085364
SEM			0.0804554				0.0463919		0.0257382
	P value
Vegfa	0.30161
PPIA	0.0150691
Ct	0.00240428
Relative Fold	0.318488
Fold Incr	0.752371

## Sheet: Bmp2
Source Data for Figure 3E-3H
							CA	PPIA	2014-11-21
							CA		2016-06-23
Hyt 21D Femur Heads
Tshr+/- NaOH	Bmp2	PPIA	∆Ct	Tshr-/- NaOH	Bmp2	PPIA	∆Ct	∆∆Ct	Fold ∆
171				184	23.2128	15.6299	7.58282	-0.649535	1.56866
172	24.3529	15.8444	8.5085	185
174	24.5732	15.7154	8.85777	187	23.6434	15.958	7.68537	-0.546985	1.46103
179	24.957	16.9613	7.99571	188	22.8822	15.6752	7.20704	-1.02531	2.0354
180	23.6336	15.7756	7.85804	206
181				207	23.3784	15.8867	7.49176	-0.740595	1.67086
182	25.2237	16.8148	8.40894	210	23.7273	15.9498	7.77744	-0.454915	1.3707
183	23.6385	15.8733	7.76517	211	22.7907	16.023	6.76773	-1.46462	2.75992
Average	24.3965	16.1641	8.23236	Average	23.2725	15.8538	7.41869	-0.813662	1.8111
Median	24.4631	15.8589	8.20233	Median	23.2956	15.9182	7.53729	-0.695065	1.61976
SD	0.66154	0.565319	0.427307	SD	0.385635	0.162359	0.374337	0.374337	0.51875
SEM			0.161507				0.112867		0.156409
	P value
Bmp2	0.00488293
PPIA	0.225218
Ct	0.00564691
Relative Fold	0.193006
Fold Incr	1.75767
Tshr+/- NaOH	Bmp2	PPIA	∆Ct	Tshr-/- TH	Bmp2	PPIA	∆Ct	∆∆Ct	Fold ∆
171				175
172	24.3529	15.8444	8.5085	176	24.9718	15.8347	9.13704	0.904685	0.534149
174	24.5732	15.7154	8.85777	177	23.7609	15.3293	8.43161	0.199255	0.871
179	24.957	16.9613	7.99571	216
180	23.6336	15.7756	7.85804	223	25.3556	15.9991	9.35648	1.12412	0.45878
181				229	24.5355	15.7537	8.7818	0.549445	0.683283
182	25.2237	16.8148	8.40894
183	23.6385	15.8733	7.76517
Average	24.3965	16.1641	8.23236	Average	24.6559	15.7292	8.92673	0.694377	0.636803
Median	24.4631	15.8589	8.20233	Median	24.7536	15.7942	8.95942	0.727065	0.608716
SD	0.66154	0.565319	0.427307	SD	0.684331	0.285502	0.406228	0.406228	0.181878
SEM			0.161507				0.122482		0.0548382
	P value
Bmp2	0.565277
PPIA	0.197923
Ct	0.0334309
Relative Fold	1.21133
Fold Incr	0.617976
Tshr-/- NaOH	Bmp2	PPIA	∆Ct	Tshr-/- TH	Bmp2	PPIA	∆Ct	∆∆Ct	Fold ∆
184	23.2128	15.6299	7.58282	175
185				176	24.9718	15.8347	9.13704	1.71835	0.303897
187	23.6434	15.958	7.68537	177	23.7609	15.3293	8.43161	1.01292	0.495543
188	22.8822	15.6752	7.20704	216
206				223	25.3556	15.9991	9.35648	1.93779	0.261017
207	23.3784	15.8867	7.49176	229	24.5355	15.7537	8.7818	1.36311	0.388744
210	23.7273	15.9498	7.77744
211	22.7907	16.023	6.76773
	23.2725	15.8538	7.41869	Average	24.6559	15.7292	8.92673	1.50804	0.3623
Median	23.2956	15.9182	7.53729	Median	24.7536	15.7942	8.95942	1.54073	0.346321
SD	0.385635	0.162359	0.374337	SD	0.684331	0.285502	0.406228	0.406228	0.103477
SEM			0.141486				0.122482		0.0311994
	P value
Bmp2	0.00327231
PPIA	0.399614
Ct	0.000308305
Relative Fold	3.66442
Fold Incr	0.351589
Hyt 21D SBglap2
Tshr+/- NaOH	Bmp2	PPIA	∆Ct	Tshr-/- NaOH	Bmp2	PPIA	∆Ct	∆∆Ct	Fold ∆
171	24.3092	14.945	9.36413	183	24.241	15.031	9.20997	-0.0556414	1.03932
172	24.1623	14.9671	9.19527	185
174	24.1253	14.8673	9.25799	187	23.5609	15.4841	8.07671	-1.1889	2.27979
179	24.3642	14.7334	9.63077	188	24.7052	16.4641	8.24117	-1.02444	2.03417
180				206
181	23.8157	14.7829	9.03279	207	23.9972	15.7251	8.27209	-0.993521	1.99104
182	24.2807	15.1313	9.14933	210	24.2119	15.1887	9.02323	-0.242381	1.18294
183	24.5025	15.2735	9.229	211	25.5329	16.2301	9.30277	0.0371586	0.974573
Average	24.2228	14.9572	9.26561	Average	24.3748	15.6872	8.68766	-0.577955	1.58364
Median	24.2807	14.945	9.229	Median	24.2265	15.6046	8.64766	-0.617951	1.58699
SD	0.21907	0.191124	0.190228	SD	0.678212	0.569206	0.549379	0.549379	0.579894
SEM			0.0718994				0.165644		0.174844
	P value
Bmp2	0.584506
PPIA	0.00832297
Ct	0.0237274
Relative Fold	0.000816569
Fold Incr	1.49273
Tshr+/- NaOH	Bmp2	PPIA	∆Ct	Tshr-/- TH	Bmp2	PPIA	∆Ct	∆∆Ct	Fold ∆
171	24.3092	14.945	9.36413	175	24.7977	15.0827	9.71506	0.449449	0.732323
172	24.1623	14.9671	9.19527	176	23.8555	14.8767	8.9788	-0.286811	1.21994
174	24.1253	14.8673	9.25799	177	24.2181	14.9471	9.27095	0.00533857	0.996306
179	24.3642	14.7334	9.63077	216	24.8615	14.9675	9.89402	0.628409	0.64689
180				223	24.1921	15.1666	9.02549	-0.240121	1.18109
181	23.8157	14.7829	9.03279	225	24.9249	15.3355	9.58941	0.323799	0.798963
182	24.2807	15.1313	9.14933	229	24.3157	14.8142	9.50149	0.235879	0.849168
183	24.5025	15.2735	9.229
Average	24.2228	14.9572	9.26561	Average	24.4522	15.0272	9.42503	0.15942	0.917812
Median	24.2807	14.945	9.229	Median	24.3157	14.9675	9.50149	0.235879	0.849168
SD	0.21907	0.191124	0.190228	SD	0.409778	0.180518	0.346273	0.346273	0.221134
SEM			0.0718994				0.104405		0.0666745
	P value
Bmp2	0.215987
PPIA	0.494761
Ct	0.306715
Relative Fold	0.255725
Fold Incr	0.895385
Tshr-/- NaOH	Bmp2	PPIA	∆Ct	Tshr-/- TH	Bmp2	PPIA	∆Ct	∆∆Ct	Fold ∆
184	24.241	15.031	9.20997	175	24.7977	15.0827	9.71506	1.0274	0.490592
185				176	23.8555	14.8767	8.9788	0.291143	0.817254
187	23.5609	15.4841	8.07671	177	24.2181	14.9471	9.27095	0.583293	0.667438
188	24.7052	16.4641	8.24117	216	24.8615	14.9675	9.89402	1.20636	0.43336
206				223	24.1921	15.1666	9.02549	0.337833	0.791229
207	23.9972	15.7251	8.27209	225	24.9249	15.3355	9.58941	0.901753	0.535236
210	24.2119	15.1887	9.02323	229	24.3157	14.8142	9.50149	0.813833	0.568868
211	25.5329	16.2301	9.30277
	24.3748	15.6872	8.68766	Average	24.4522	15.0272	9.42503	0.737375	0.614854
Median	24.2265	15.6046	8.64766	Median	24.3157	14.9675	9.50149	0.813833	0.568868
SD	0.678212	0.569206	0.549379	SD	0.409778	0.180518	0.346273	0.346273	0.148141
SEM			0.207646				0.104405		0.0446661
	P value
Bmp2	0.80445
PPIA	0.0139356
Ct	0.013337
Relative Fold	1.17429
Fold Incr	0.59983

## Sheet: Sox9
Source Data for Figure 3E-3H
							CA	PPIA	2014-11-21
							CA		2014-11-21
Hyt 21D Femur Heads
Tshr+/- NaOH	Sox9	PPIA	∆Ct	Tshr-/- NaOH	Sox9	PPIA	∆Ct	∆∆Ct	Fold ∆
171				184	18.9947	15.6299	3.36475	-0.720618	1.64789
172	19.7749	15.8444	3.93051	185	19.7023	15.8385	3.86381	-0.221558	1.16599
174	20.4532	15.7154	4.73775	187	18.9362	15.958	2.97819	-1.10718	2.15424
179				188	19.1419	15.6752	3.46669	-0.618678	1.53547
180	20.1612	15.7756	4.3856	206
181				207	18.5865	15.8867	2.69984	-1.38553	2.61268			PPIA	Sox9
182	20.5285	16.8148	3.7137	210	19.2609	15.9498	3.31112	-0.774248	1.7103		Blank	23.2836	Undetermined
183	19.5326	15.8733	3.65928	211	18.7824	16.023	2.75939	-1.32598	2.50703		Blank
Average	20.0901	16.0047	4.08537	Average	19.0578	15.8516	3.20626	-0.879112	1.9048
Median	20.1612	15.8444	3.93051	Median	18.9947	15.8867	3.31112	-0.774248	1.7103
SD	0.429885	0.456983	0.463522	SD	0.360657	0.148326	0.417229	0.417229	0.534176
SEM			0.175195				0.125799		0.16106
	P value
Sox9	0.00110454
PPIA	0.420096
Ct	0.00632232
Relative Fold	0.213336
Fold Incr	1.83924
Tshr+/- NaOH	Sox9	PPIA	∆Ct	Tshr-/- TH	Sox9	PPIA	∆Ct	∆∆Ct	Fold ∆
171				175
172	19.7749	15.8444	3.93051	176	19.818	15.8347	3.98323	-0.102138	1.07336
174	20.4532	15.7154	4.73775	177	19.4244	15.3293	4.09514	0.009772	0.993249
179				216	20.6202	16.4945	4.12567	0.040302	0.972451
180	20.1612	15.7756	4.3856	223
181				229	19.6156	15.7537	3.86194	-0.223428	1.1675
182	20.5285	16.8148	3.7137
183	19.5326	15.8733	3.65928
Average	20.0901	16.0047	4.08537	Average	19.8696	15.8531	4.01649	-0.068873	1.05164
Median	20.1612	15.8444	3.93051	Median	19.7168	15.7942	4.03918	-0.046183	1.03331
SD	0.429885	0.456983	0.463522	SD	0.525604	0.481681	0.119858	0.119858	0.0886505
SEM			0.175195				0.0361386		0.0267291
	P value
Sox9	0.509711
PPIA	0.643621
Ct	0.783205
Relative Fold	0.0025995
Fold Incr	1.0489
Tshr-/- NaOH	Sox9	PPIA	∆Ct	Tshr-/- TH	Sox9	PPIA	∆Ct	∆∆Ct	Fold ∆
184	18.9947	15.6299	3.36475	175
185	19.7023	15.8385	3.86381	176	19.818	15.8347	3.98323	0.776974	0.583589
187	18.9362	15.958	2.97819	177	19.4244	15.3293	4.09514	0.888884	0.540032
188	19.1419	15.6752	3.46669	216	20.6202	16.4945	4.12567	0.919414	0.528724
206				223
207	18.5865	15.8867	2.69984	229	19.6156	15.7537	3.86194	0.655684	0.634774
210	19.2609	15.9498	3.31112
211	18.7824	16.023	2.75939
	19.0578	15.8516	3.20626	Average	19.8696	15.8531	4.01649	0.810239	0.57178
Median	18.9947	15.8867	3.31112	Median	19.7168	15.7942	4.03918	0.832929	0.561811
SD	0.360657	0.148326	0.417229	SD	0.525604	0.481681	0.119858	0.119858	0.0481995
SEM			0.157698				0.0361386		0.0145327
	P value
Sox9	0.0135128
PPIA	0.993957
Ct	0.00478049
Relative Fold	0.865081
Fold Incr	0.570287
Hyt 21D SBglap2
Tshr+/- NaOH	Sox9	PPIA	∆Ct	Tshr-/- NaOH	Sox9	PPIA	∆Ct	∆∆Ct	Fold ∆
171				183
172	20.3579	14.9671	5.39081	185	19.8052	15.9817	3.82344	-1.14853	2.21688
174	19.5166	14.8673	4.64931	187	18.9204	15.4841	3.43622	-1.53575	2.89939
179	19.3483	14.7334	4.61486	188	19.587	16.4641	3.12297	-1.849	3.6025
180				206	19.1204	14.9896	4.13076	-0.84121	1.79155
181	19.4671	14.7829	4.68417	207	18.8217	15.7251	3.09667	-1.8753	3.66878
182	20.4468	15.1313	5.31544	210
183	20.4507	15.2735	5.17723	211	20.2024	16.2301	3.97228	-0.99969	1.99957
Average	19.9312	14.9592	4.97197	Average	19.4095	15.8124	3.59706	-1.37491	2.69645
Median	19.9372	14.9172	4.9307	Median	19.3537	15.8534	3.62983	-1.34214	2.55814
SD	0.537569	0.209283	0.360554	SD	0.544987	0.532951	0.442243	0.442243	0.817559
SEM			0.136277				0.133341		0.246503
	P value
Sox9	0.125999
PPIA	0.00446177
Ct	0.000150584
Relative Fold	0.869874
Fold Incr	2.59352
Tshr+/- NaOH	Sox9	PPIA	∆Ct	Tshr-/- TH	Sox9	PPIA	∆Ct	∆∆Ct	Fold ∆
171				175	20.7106	15.0827	5.62797	0.656	0.634635
172	20.3579	14.9671	5.39081	176	19.6521	14.8767	4.77538	-0.19659	1.14599
174	19.5166	14.8673	4.64931	177	19.9777	14.9471	5.03055	0.05858	0.960209
179	19.3483	14.7334	4.61486	216
180				223
181	19.4671	14.7829	4.68417	225	20.4277	15.3355	5.09221	0.12024	0.920035
182	20.4468	15.1313	5.31544	229	19.684	14.8142	4.86978	-0.10219	1.0734
183	20.4507	15.2735	5.17723
Average	19.9312	14.9592	4.97197	Average	20.0904	15.0112	5.07918	0.107208	0.946853
Median	19.9372	14.9172	4.9307	Median	19.9777	14.9471	5.03055	0.05858	0.960209
SD	0.537569	0.209283	0.360554	SD	0.465952	0.206913	0.331605	0.331605	0.196244
SEM			0.136277				0.0999827		0.0591697
	P value
Sox9	0.616566
PPIA	0.689739
Ct	0.623143
Relative Fold	0.192557
Fold Incr	0.928383
Tshr-/- NaOH	Sox9	PPIA	∆Ct	Tshr-/- TH	Sox9	PPIA	∆Ct	∆∆Ct	Fold ∆
184				175	20.7106	15.0827	5.62797	2.03091	0.2447
185	19.8052	15.9817	3.82344	176	19.6521	14.8767	4.77538	1.17832	0.441865
187	18.9204	15.4841	3.43622	177	19.9777	14.9471	5.03055	1.43349	0.370233
188	19.587	16.4641	3.12297	216
206	19.1204	14.9896	4.13076	223
207	18.8217	15.7251	3.09667	225	20.4277	15.3355	5.09221	1.49515	0.354743
210				229	19.684	14.8142	4.86978	1.27272	0.413878
211	20.2024	16.2301	3.97228
	19.4095	15.8124	3.59706	Average	20.0904	15.0112	5.07918	1.48212	0.365084
Median	19.3537	15.8534	3.62983	Median	19.9777	14.9471	5.03055	1.43349	0.370233
SD	0.544987	0.532951	0.442243	SD	0.465952	0.206913	0.331605	0.331605	0.0756668
SEM			0.167152				0.0999827		0.0228144
	P value
Sox9	0.0554349
PPIA	0.0118022
Ct	0.000165307
Relative Fold	3.2896
Fold Incr	0.357962

## Sheet: Runx2
Source Data for Figure 3E-3H
							CA	PPIA	2014-11-21
							CA		2014-11-21
Hyt 21D Femur Heads
Tshr+/- NaOH	Runx2	PPIA	∆Ct	Tshr-/- NaOH	Runx2	PPIA	∆Ct	∆∆Ct	Fold ∆
171				184	21.1314	15.6299	5.50149	-0.321378	1.24952
172	21.32	15.8444	5.47559	185	21.5545	15.8385	5.716	-0.106868	1.07689
174	21.8661	15.7154	6.15064	187	21.6203	15.958	5.66232	-0.160548	1.11771
179				188	21.2819	15.6752	5.60671	-0.216158	1.16164
180	21.9358	15.7756	6.16022	206
181				207								PPIA	Runx2
182	22.28	16.8148	5.46527	210	21.6147	15.9498	5.6649	-0.157968	1.11571		Blank	23.2836	24.1139
183	21.7359	15.8733	5.86262	211							Blank
Average	21.8276	16.0047	5.82287	Average	21.4406	15.8103	5.63028	-0.192584	1.14429
Median	21.8661	15.8444	5.86262	Median	21.5545	15.8385	5.66232	-0.160548	1.11771
SD	0.347829	0.456983	0.343256	SD	0.221561	0.152366	0.0817243	0.0817243	0.0660322
SEM			0.129739				0.0246408		0.0199094
	P value
Runx2	0.0691098
PPIA	0.39315
Ct	0.257051
Relative Fold	0.0122899
Fold Incr	1.14281
Tshr+/- NaOH	Runx2	PPIA	∆Ct	Tshr-/- TH	Runx2	PPIA	∆Ct	∆∆Ct	Fold ∆
171				175
172	21.32	15.8444	5.47559	176	21.4267	15.8347	5.59193	-0.230938	1.1736
174	21.8661	15.7154	6.15064	177	19.955	15.3293	4.62572	-1.19715	2.29286
179				216
180	21.9358	15.7756	6.16022	223
181				229	20.9055	15.7537	5.15187	-0.670998	1.59217
182	22.28	16.8148	5.46527
183	21.7359	15.8733	5.86262
Average	21.8276	16.0047	5.82287	Average	20.7624	15.6392	5.12317	-0.699695	1.68621
Median	21.8661	15.8444	5.86262	Median	20.9055	15.7537	5.15187	-0.670998	1.59217
SD	0.347829	0.456983	0.343256	SD	0.7462	0.271462	0.483744	0.483744	0.565525
SEM			0.129739				0.145854		0.170512
	P value
Runx2	0.0300919
PPIA	0.262453
Ct	0.0517595
Relative Fold	0.0466348
Fold Incr	1.62416
Tshr-/- NaOH	Runx2	PPIA	∆Ct	Tshr-/- TH	Runx2	PPIA	∆Ct	∆∆Ct	Fold ∆
184	21.1314	15.6299	5.50149	175
185	21.5545	15.8385	5.716	176	21.4267	15.8347	5.59193	-0.038354	1.02694
187	21.6203	15.958	5.66232	177	19.955	15.3293	4.62572	-1.00456	2.00634
188	21.2819	15.6752	5.60671	216
206				223
207				229	20.9055	15.7537	5.15187	-0.478414	1.39321
210	21.6147	15.9498	5.6649
211
	21.4406	15.8103	5.63028	Average	20.7624	15.6392	5.12317	-0.507111	1.4755
Median	21.5545	15.8385	5.66232	Median	20.9055	15.7537	5.15187	-0.478414	1.39321
SD	0.221561	0.152366	0.0817243	SD	0.7462	0.271462	0.483744	0.483744	0.494856
SEM			0.0308889				0.145854		0.149205
	P value
Runx2	0.0940611
PPIA	0.286185
Ct	0.0519895
Relative Fold	0.00054601
Fold Incr	1.4212
Hyt 21D SBglap2
Tshr+/- NaOH	Runx2	PPIA	∆Ct	Tshr-/- NaOH	Runx2	PPIA	∆Ct	∆∆Ct	Fold ∆
171	20.2947	14.945	5.34964	183	20.4446	15.031	5.41353	-0.149027	1.10882
172	20.9462	14.9671	5.9792	185
174	19.9844	14.8673	5.11707	187	20.3889	15.4841	4.90479	-0.657767	1.57764
179				188	21.0272	16.4641	4.56316	-0.999397	1.99916
180				206	19.8386	14.9896	4.84903	-0.713527	1.63981
181	20.1464	14.7829	5.36353	207	20.9618	15.7251	5.23674	-0.325817	1.25337
182	20.9339	15.1313	5.80256	210	20.9103	15.1887	5.72164	0.159083	0.895594
183	21.0369	15.2735	5.76334	211
Average	20.5571	14.9945	5.56256	Average	20.5952	15.4804	5.11482	-0.447742	1.4124			PPIA
Median	20.6143	14.956	5.56344	Median	20.6775	15.3364	5.07077	-0.491792	1.41551		Blank	23.2836
SD	0.466714	0.179292	0.33314	SD	0.459996	0.557739	0.422234	0.422234	0.401957		Blank
SEM			0.125915				0.127308		0.121195
	P value
Runx2	0.889364
PPIA	0.0696109
Ct	0.0687413
Relative Fold	0.000650634
Fold Incr	1.3639
Tshr+/- NaOH	Runx2	PPIA	∆Ct	Tshr-/- TH	Runx2	PPIA	∆Ct	∆∆Ct	Fold ∆
171	20.2947	14.945	5.34964	175	20.3049	15.0827	5.22224	-0.340317	1.26603
172	20.9462	14.9671	5.9792	176	20.1332	14.8767	5.25644	-0.306117	1.23638
174	19.9844	14.8673	5.11707	177	20.6303	14.9471	5.68315	0.120593	0.919809
179				216	20.6603	14.9675	5.69273	0.130173	0.913722
180				223
181	20.1464	14.7829	5.36353	225	20.987	15.3355	5.65154	0.0889833	0.940185
182	20.9339	15.1313	5.80256	229	20.3249	14.8142	5.5107	-0.0518567	1.0366
183	21.0369	15.2735	5.76334
Average	20.5571	14.9945	5.56256	Average	20.5068	15.004	5.5028	-0.0597567	1.05212
Median	20.6143	14.956	5.56344	Median	20.4776	14.9573	5.58112	0.0185633	0.988392
SD	0.466714	0.179292	0.33314	SD	0.310757	0.185928	0.214566	0.214566	0.160711
SEM			0.125915				0.0646941		0.0484562
	P value
Runx2	0.830418
PPIA	0.930483
Ct	0.71954
Relative Fold	0.0239659
Fold Incr	1.04229
Tshr-/- NaOH	Runx2	PPIA	∆Ct	Tshr-/- TH	Runx2	PPIA	∆Ct	∆∆Ct	Fold ∆
184	20.4446	15.031	5.41353	175	20.3049	15.0827	5.22224	0.107425	0.928243
185				176	20.1332	14.8767	5.25644	0.141625	0.906498
187	20.3889	15.4841	4.90479	177	20.6303	14.9471	5.68315	0.568335	0.674395
188	21.0272	16.4641	4.56316	216	20.6603	14.9675	5.69273	0.577915	0.669931
206	19.8386	14.9896	4.84903	223
207	20.9618	15.7251	5.23674	225	20.987	15.3355	5.65154	0.536725	0.689334
210	20.9103	15.1887	5.72164	229	20.3249	14.8142	5.5107	0.395885	0.760023
211
	20.5952	15.4804	5.11482	Average	20.5068	15.004	5.5028	0.387985	0.771404
Median	20.6775	15.3364	5.07077	Median	20.4776	14.9573	5.58112	0.466305	0.724678
SD	0.459996	0.557739	0.422234	SD	0.310757	0.185928	0.214566	0.214566	0.117832
SEM			0.15959				0.0646941		0.0355276
	P value
Runx2	0.704358
PPIA	0.0752159
Ct	0.0725876
Relative Fold	0.363068
Fold Incr	0.764196

## Sheet: Sp7
Source Data for Figure 3E-3H
							CA	PPIA	2014-04-10
								Sp7	2014-04-10
Hyt 21D Femur Heads
Tshr+/- NaOH	Sp7	PPIA	∆Ct	Tshr-/- NaOH	Sp7	PPIA	∆Ct	∆∆Ct	Fold ∆
5				1	20.6934	15.8244	4.86903	-0.586789	1.5019
6	20.6278	15.4724	5.15536	2	20.6665	15.6315	5.035	-0.42082	1.33869
8	21.1911	15.5328	5.65825	3
9	21.2714	15.5884	5.68295	11	20.7108	15.6755	5.03534	-0.420484	1.33838
10	20.8218	15.679	5.14282	72	21.0254	15.8363	5.1891	-0.266727	1.20308
82	21.6817	15.881	5.80068	74	20.9907	15.5912	5.39946	-0.0563614	1.03984			PPIA	Sp7
83	21.1427	15.8478	5.29488	75	21.562	16.2857	5.2763	-0.179523	1.13251		uni	15.5074	22.9746
				81	20.5921	15.4924	5.09972	-0.356099	1.27996		blank	26.6275	Undetermined
Average	21.1227	15.6669	5.45582	Average	20.8916	15.7624	5.12914	-0.326686	1.26205
Median	21.1669	15.6337	5.47656	Median	20.7108	15.6755	5.09972	-0.356099	1.27996
SD	0.367455	0.167741	0.291767	SD	0.338987	0.26142	0.17536	0.17536	0.152307
SEM			0.110278				0.0528729		0.0459223
	P value
Sp7	0.262974
PPIA	0.459114
Ct	0.0298633
Relative Fold	0.0228998
Fold Incr	1.25413
Tshr+/- NaOH	Sp7	PPIA	∆Ct	Tshr-/- TH	Sp7	PPIA	∆Ct	∆∆Ct	Fold ∆
5				17	21.7789	15.4479	6.33105	0.875228	0.545168
6	20.6278	15.4724	5.15536	23	21.7317	15.5179	6.21384	0.758021	0.591307
8	21.1911	15.5328	5.65825	108	21.2955	15.2427	6.05279	0.596968	0.661142
9	21.2714	15.5884	5.68295	113	21.9911	15.2587	6.73238	1.27656	0.41278
10	20.8218	15.679	5.14282	115
82	21.6817	15.881	5.80068	118	22.3805	15.9753	6.40516	0.949336	0.517871
83	21.1427	15.8478	5.29488	119	22.2782	16.0141	6.26409	0.80827	0.571066
Average	21.1227	15.6669	5.45582	Average	21.9093	15.5761	6.33322	0.877397	0.549889
Median	21.1669	15.6337	5.47656	Median	21.885	15.4829	6.29757	0.841749	0.558117
SD	0.367455	0.167741	0.291767	SD	0.397533	0.341478	0.228988	0.228988	0.0829307
SEM			0.110278				0.0690424		0.0250045
	P value
Sp7	0.00518909
PPIA	0.571665
Ct	0.000174245
Relative Fold	1.22409
Fold Incr	0.544349
Tshr-/- NaOH	Sp7	PPIA	∆Ct	Tshr-/- TH	Sp7	PPIA	∆Ct	∆∆Ct	Fold ∆
1	20.6934	15.8244	4.86903	17	21.7789	15.4479	6.33105	1.20191	0.434698
2	20.6665	15.6315	5.035	23	21.7317	15.5179	6.21384	1.08471	0.471488
3				108	21.2955	15.2427	6.05279	0.923655	0.527172
11	20.7108	15.6755	5.03534	113	21.9911	15.2587	6.73238	1.60324	0.329137
72	21.0254	15.8363	5.1891	115
74	20.9907	15.5912	5.39946	118	22.3805	15.9753	6.40516	1.27602	0.412933
75	21.562	16.2857	5.2763	119	22.2782	16.0141	6.26409	1.13496	0.455349
81	20.5921	15.4924	5.09972
	20.8916	15.7624	5.12914	Average	21.9093	15.5761	6.33322	1.20408	0.438463
Median	20.7108	15.6755	5.09972	Median	21.885	15.4829	6.29757	1.16844	0.445023
SD	0.338987	0.26142	0.17536	SD	0.397533	0.341478	0.228988	0.228988	0.0661261
SEM			0.0662797				0.0690424		0.0199378
	P value
Sp7	0.000410314
PPIA	0.28876
Ct	3.60621e-07
Relative Fold	2.05369
Fold Incr	0.434045
Hyt 21D SBglap2
Tshr+/- NaOH	Sp7	PPIA	∆Ct	Tshr-/- NaOH	Sp7	PPIA	∆Ct	∆∆Ct	Fold ∆
171				183
172	21.6071	14.965	6.64216	185	22.3411	15.7346	6.60648	0.0818657	0.944835
174	21.5159	14.9346	6.58131	187	21.3987	15.4436	5.95511	-0.569504	1.48401
179				188	22.4009	16.2821	6.11877	-0.405844	1.32486
180	21.5122	15.4164	6.09582	206	20.4647	14.9129	5.55179	-0.972824	1.96268
181	20.9507	14.7369	6.21379	207	22.0484	15.6058	6.44261	-0.0820043	1.05849			PPIA	Sp7
182	21.9184	15.0211	6.89732	210	21.8605	15.1275	6.73297	0.208356	0.865523		Blank	21.7498	35.6412
183	21.8375	15.1202	6.71729	211							Blank
Average	21.557	15.0324	6.52461	Average	21.7524	15.5178	6.23462	-0.289993	1.2734
Median	21.5615	14.993	6.61174	Median	21.9544	15.5247	6.28069	-0.243924	1.19168
SD	0.341475	0.226589	0.307748	SD	0.727943	0.482198	0.444454	0.444454	0.410516
SEM			0.116318				0.134008		0.123775
	P value
Sp7	0.564884
PPIA	0.0497051
Ct	0.218198
Relative Fold	0.0238583
Fold Incr	1.22263
Tshr+/- NaOH	Sp7	PPIA	∆Ct	Tshr-/- TH	Sp7	PPIA	∆Ct	∆∆Ct	Fold ∆
171				175	21.8189	14.9972	6.82165	0.297036	0.813923
172	21.6071	14.965	6.64216	176	21.3064	14.7946	6.51181	-0.0128043	1.00891
174	21.5159	14.9346	6.58131	177	21.526	14.9543	6.57177	0.0471557	0.967843
179				216	21.7526	14.959	6.79366	0.269046	0.829868
180	21.5122	15.4164	6.09582	223	21.5613	15.1871	6.37413	-0.150484	1.10994
181	20.9507	14.7369	6.21379	225
182	21.9184	15.0211	6.89732	229	21.3503	14.8148	6.53553	0.0109157	0.992462
183	21.8375	15.1202	6.71729
Average	21.557	15.0324	6.52461	Average	21.5526	14.9512	6.60142	0.0768107	0.953826
Median	21.5615	14.993	6.61174	Median	21.5436	14.9566	6.55365	0.0290357	0.980152
SD	0.341475	0.226589	0.307748	SD	0.20651	0.142118	0.173418	0.173418	0.113168
SEM			0.116318				0.0522875		0.0341213
	P value
Sp7	0.979025
PPIA	0.474198
Ct	0.605926
Relative Fold	0.0626143
Fold Incr	0.948151
Tshr-/- NaOH	Sp7	PPIA	∆Ct	Tshr-/- TH	Sp7	PPIA	∆Ct	∆∆Ct	Fold ∆
183				175	21.8189	14.9972	6.82165	0.587028	0.665713
185	22.3411	15.7346	6.60648	176	21.3064	14.7946	6.51181	0.277188	0.825198
187	21.3987	15.4436	5.95511	177	21.526	14.9543	6.57177	0.337148	0.791604
188	22.4009	16.2821	6.11877	216	21.7526	14.959	6.79366	0.559038	0.678754
206	20.4647	14.9129	5.55179	223	21.5613	15.1871	6.37413	0.139508	0.907828
207	22.0484	15.6058	6.44261	225
210	21.8605	15.1275	6.73297	229	21.3503	14.8148	6.53553	0.300908	0.811741
211
	21.7524	15.5178	6.23462	Average	21.5526	14.9512	6.60142	0.366803	0.78014
Median	21.9544	15.5247	6.28069	Median	21.5436	14.9566	6.55365	0.319028	0.801673
SD	0.727943	0.482198	0.444454	SD	0.20651	0.142118	0.173418	0.173418	0.0925605
SEM			0.167988				0.0522875		0.027908
	P value
Sp7	0.53234
PPIA	0.0201016
Ct	0.0890447
Relative Fold	0.291839
Fold Incr	0.775499

## Sheet: Ctnnb1
Source Data for Figure 3E-3H
							CA	PPIA	2014-11-21
							CA		2014-11-21
Hyt 21D Femur Heads
Tshr+/- NaOH	Ctnnb1	PPIA	∆Ct	Tshr-/- NaOH	Ctnnb1	PPIA	∆Ct	∆∆Ct	Fold ∆
171				184	26.6142	15.6299	10.9842	0.045372	0.96904
172	26.4793	15.8444	10.6349	185	25.9356	15.8385	10.0971	-0.841778	1.79226
174	26.8375	15.7154	11.122	187	26.32	15.958	10.362	-0.576838	1.49158
179				188	26.4883	15.6752	10.8132	-0.125708	1.09104
180	26.7557	15.7756	10.9801	206
181				207								PPIA	Ctnnb1
182	28.3263	16.8148	11.5115	210	26.3151	15.9498	10.3653	-0.573568	1.4882		Blank	23.2836	Undetermined
183	26.3191	15.8733	10.4458	211	26.9869	16.023	10.9639	0.025002	0.982819		Blank
Average	26.9436	16.0047	10.9389	Average	26.4433	15.8457	10.5976	-0.341253	1.30249
Median	26.7557	15.8444	10.9801	Median	26.4042	15.8941	10.5892	-0.349638	1.28962
SD	0.800636	0.456983	0.417956	SD	0.351031	0.161596	0.371504	0.371504	0.337106
SEM			0.157973				0.112013		0.101641
	P value
Ctnnb1	0.198028
PPIA	0.443547
Ct	0.185215
Relative Fold	0.000915139
Fold Incr	1.26686
Tshr+/- NaOH	Ctnnb1	PPIA	∆Ct	Tshr-/- TH	Ctnnb1	PPIA	∆Ct	∆∆Ct	Fold ∆
171				175
172	26.4793	15.8444	10.6349	176
174	26.8375	15.7154	11.122	177	25.6327	15.3293	10.3034	-0.635418	1.55339
179				216	26.8058	16.4945	10.3112	-0.627638	1.54503
180	26.7557	15.7756	10.9801	223	26.3055	15.9991	10.3063	-0.632538	1.55029
181				229	26.2255	15.7537	10.4718	-0.467048	1.38228
182	28.3263	16.8148	11.5115
183	26.3191	15.8733	10.4458
Average	26.9436	16.0047	10.9389	Average	26.2424	15.8942	10.3482	-0.590661	1.50775
Median	26.7557	15.8444	10.9801	Median	26.2655	15.8764	10.3088	-0.630088	1.54766
SD	0.800636	0.456983	0.417956	SD	0.480741	0.486586	0.0824709	0.0824709	0.0837171
SEM			0.157973				0.0248659		0.0252417
	P value
Ctnnb1	0.169302
PPIA	0.736125
Ct	0.0286247
Relative Fold	0.258257
Fold Incr	1.50594
Tshr-/- NaOH	Ctnnb1	PPIA	∆Ct	Tshr-/- TH	Ctnnb1	PPIA	∆Ct	∆∆Ct	Fold ∆
184	26.6142	15.6299	10.9842	175
185	25.9356	15.8385	10.0971	176
187	26.32	15.958	10.362	177	25.6327	15.3293	10.3034	-0.294165	1.22618
188	26.4883	15.6752	10.8132	216	26.8058	16.4945	10.3112	-0.286385	1.21958
206				223	26.3055	15.9991	10.3063	-0.291285	1.22373
207				229	26.2255	15.7537	10.4718	-0.125795	1.09111
210	26.3151	15.9498	10.3653
211	26.9869	16.023	10.9639
	26.4433	15.8457	10.5976	Average	26.2424	15.8942	10.3482	-0.249408	1.19015
Median	26.4042	15.8941	10.5892	Median	26.2655	15.8764	10.3088	-0.288835	1.22166
SD	0.351031	0.161596	0.371504	SD	0.480741	0.486586	0.0824709	0.0824709	0.0660826
SEM			0.140415				0.0248659		0.0199246
	P value
Ctnnb1	0.463653
PPIA	0.822815
Ct	0.230938
Relative Fold	0.0278678
Fold Incr	1.18872
Hyt 21D SBglap2
Tshr+/- NaOH	Ctnnb1	PPIA	∆Ct	Tshr-/- NaOH	Ctnnb1	PPIA	∆Ct	∆∆Ct	Fold ∆
171	24.9591	14.945	10.014	183	25.4479	15.031	10.4168	0.300143	0.812172
172				185	26.5892	15.9817	10.6075	0.490803	0.711629
174	24.8102	14.8673	9.94286	187	25.4307	15.4841	9.94653	-0.170167	1.12519
179				188
180	25.3914	15.3979	9.99354	206	24.7335	14.9896	9.74394	-0.372757	1.29482
181	24.7603	14.7829	9.97744	207	26.1524	15.7251	10.4273	0.310633	0.806288			PPIA
182	25.5505	15.1313	10.4192	210							Blank	23.2836
183	25.6267	15.2735	10.3531	211							Blank
Average	25.183	15.0663	10.1167	Average	25.6707	15.4423	10.2284	0.111731	0.95002
Median	25.1752	15.0382	10.0038	Median	25.4479	15.4841	10.4168	0.300143	0.812172
SD	0.385514	0.241548	0.211048	SD	0.717853	0.432079	0.365018	0.365018	0.248025
SEM			0.0797688				0.110057		0.0747824
	P value
Ctnnb1	0.182925
PPIA	0.100822
Ct	0.540117
Relative Fold	0.22729
Fold Incr	0.925477
Tshr+/- NaOH	Ctnnb1	PPIA	∆Ct	Tshr-/- TH	Ctnnb1	PPIA	∆Ct	∆∆Ct	Fold ∆
171	24.9591	14.945	10.014	175
172				176	24.6494	14.8767	9.77268	-0.344017	1.26929
174	24.8102	14.8673	9.94286	177	25.4197	14.9471	10.4726	0.355853	0.781407
179				216	25.5121	14.9675	10.5445	0.427843	0.743372
180	25.3914	15.3979	9.99354	223
181	24.7603	14.7829	9.97744	225	25.6075	15.3355	10.2721	0.155383	0.897894
182	25.5505	15.1313	10.4192	229	25.1122	14.8142	10.298	0.181353	0.881875
183	25.6267	15.2735	10.3531
Average	25.183	15.0663	10.1167	Average	25.2602	14.9882	10.272	0.155283	0.914767
Median	25.1752	15.0382	10.0038	Median	25.4197	14.9471	10.298	0.181353	0.881875
SD	0.385514	0.241548	0.211048	SD	0.388746	0.203353	0.301868	0.301868	0.208693
SEM			0.0797688				0.0910167		0.0629233
	P value
Ctnnb1	0.749426
PPIA	0.581081
Ct	0.341626
Relative Fold	0.208987
Fold Incr	0.897956
Tshr-/- NaOH	Ctnnb1	PPIA	∆Ct	Tshr-/- TH	Ctnnb1	PPIA	∆Ct	∆∆Ct	Fold ∆
184	25.4479	15.031	10.4168	175
185	26.5892	15.9817	10.6075	176	24.6494	14.8767	9.77268	-0.455748	1.37149
187	25.4307	15.4841	9.94653	177	25.4197	14.9471	10.4726	0.244122	0.844329
188				216	25.5121	14.9675	10.5445	0.316112	0.803232
206	24.7335	14.9896	9.74394	223
207	26.1524	15.7251	10.4273	225	25.6075	15.3355	10.2721	0.043652	0.970196
210				229	25.1122	14.8142	10.298	0.069622	0.952888
211
	25.6707	15.4423	10.2284	Average	25.2602	14.9882	10.272	0.043552	0.988428
Median	25.4479	15.4841	10.4168	Median	25.4197	14.9471	10.298	0.069622	0.952888
SD	0.717853	0.432079	0.365018	SD	0.388746	0.203353	0.301868	0.301868	0.225498
SEM			0.137964				0.0910167		0.0679901
	P value
Ctnnb1	0.293387
PPIA	0.0661682
Ct	0.842241
Relative Fold	0.119315
Fold Incr	0.970263

[truncated: 10 more sheets: Col2a1, Acan, Col10a1, Ibsp, Bglap2, Mmp13, Adamts4, Adamts5, Alpl, Acp5]
