# Supplementary material for: Differences in pathways contributing to thyroid hormone effects on postnatal cartilage calcification versus secondary ossification center development
Source: eLife. 2022 Jan 31;11:e76730. doi: 10.7554/eLife.76730 (PMC8830887; doi:10.7554/eLife.76730)
Supplement: Figure 3—source data 3. — Reverse transcriptase quantitative polymerase chain reaction (RT-qPCR) data for day 10 and day 21 comparing femur head (FH) versus distal femur (DF) from euthyroid mice. Average fold changes plotted and t-test values are highlighted in yellow. [file elife-76730-fig3-data3.xlsx]

## Sheet: 10d
Source Data for Figure 3I
Hyt#15 - 10d SOC
Hyt#19 - 10d FH
Hyt+ SOC	Shh	PPIA	∆Ct	Hyt+ FH	Shh	PPIA	∆Ct	∆∆Ct	Fold ∆
1				1	29.1533	15.643	13.5102	0.852194	0.553942
2				2	27.7329	16.2212	11.5116	-1.14641	2.21362
3	26.7835	15.7971	10.9865	3	28.5725	15.8063	12.7663	0.108194	0.927748
4	29.2796	15.8616	13.418	4	28.4625	16.2288	12.2337	-0.424336	1.34195
5	29.2163	15.6583	13.558	5	28.9709	15.5344	13.4365	0.778454	0.582991
6	28.4377	15.7679	12.6697	6	28.6602	16.1893	12.4708	-0.187216	1.13856
Average	28.4293	15.7712	12.6581	Average	28.592	15.9372	12.6549	-0.00318554	1.12647
Median	28.827	15.7825	13.0439	Median	28.6163	15.9978	12.6185	-0.0395105	1.03316
SD	1.16204	0.0848256	1.18063	SD	0.493659	0.3147	0.758054	0.758054	0.614999
SEM			0.590315				0.309474		0.251072
	P value
Shh	0.346571
PPIA	0.0907128
Ct	0.148818
Relative Fold	0.108863
Fold Incr	1.8187
Hyt+ SOC	Ihh	PPIA	∆Ct	Hyt+ FH	Ihh	PPIA	∆Ct	∆∆Ct	Fold ∆
1				1	23.4385	15.643	7.79551	1.98662	0.25233
2				2
3	21.77	15.7971	5.9729	3	23.9913	15.8063	8.185	2.37611	0.192628
4	21.5675	15.8616	5.70594	4	24.5917	16.2288	8.36291	2.55402	0.17028
5	21.3264	15.6583	5.66804	5	23.8461	15.5344	8.31177	2.50288	0.176425
6	21.6566	15.7679	5.8887	6	23.9124	16.1893	7.72306	1.91417	0.265325
Average	21.5801	15.7712	5.80889	Average	23.956	15.8803	8.07565	2.26676	0.211398
Median	21.6121	15.7825	5.79732	Median	23.9124	15.8063	8.185	2.37611	0.192628
SD	0.188353	0.0848256	0.145725	SD	0.414439	0.315576	0.29708	0.29708	0.0442991
SEM			0.0728623				0.121282		0.0180851
	P value
Ihh	1.53053e-05
PPIA	0.527884
Ct	2.41765e-06
Relative Fold	6.57326
Fold Incr	0.207796
Hyt+ SOC	Tnfsf11	PPIA	∆Ct	Hyt+ FH	Tnfsf11	PPIA	∆Ct	∆∆Ct	Fold ∆
1				1	23.9704	15.643	8.32733	1.02198	0.49244
2				2	24.3269	16.2212	8.10572	0.800371	0.574202
3	22.8074	15.7971	7.01029	3
4	23.3085	15.8616	7.44691	4	24.5791	16.2288	8.35037	1.04502	0.484638
5	22.8832	15.6583	7.22484	5	24.5229	15.5344	8.98853	1.68318	0.311395
6	23.3073	15.7679	7.53934	6	24.646	16.1893	8.45673	1.15138	0.450194
Average	23.0766	15.7712	7.30535	Average	24.4091	15.9633	8.44574	1.14039	0.462574
Median	23.0952	15.7825	7.33588	Median	24.5229	16.1893	8.35037	1.04502	0.484638
SD	0.268881	0.0848256	0.236877	SD	0.272594	0.344464	0.329193	0.329193	0.0959788
SEM			0.0967047				0.134392		0.0391832
	P value
Tnfsf11	0.000158691
PPIA	0.317776
Ct	0.000664996
Relative Fold	2.15966
Fold Incr	0.453638
Hyt+ SOC	Tnfrsf11b	PPIA	∆Ct	Hyt+ FH	Tnfrsf11b	PPIA	∆Ct	∆∆Ct	Fold ∆
1				1	19.8694	15.643	4.2264	-0.920767	1.89312
2				2	20.61	16.2212	4.38882	-0.758347	1.69155
3	21.3359	15.7971	5.53886	3
4	20.7181	15.8616	4.85655	4	21.2187	16.2288	4.98996	-0.157207	1.11513
5	20.9744	15.6583	5.31605	5	19.7492	15.5344	4.21482	-0.932347	1.90838
6	20.6451	15.7679	4.87721	6	20.2254	16.1893	4.03607	-1.1111	2.1601
Average	20.9184	15.7712	5.14717	Average	20.3346	15.9633	4.37121	-0.775953	1.75366
Median	20.8463	15.7825	5.09663	Median	20.2254	16.1893	4.2264	-0.920767	1.89312
SD	0.312106	0.0848256	0.336293	SD	0.597607	0.344464	0.367732	0.367732	0.393752
SEM			0.137291				0.150126		0.160749
	P value
Tnfrsf11b	0.122619
PPIA	0.317776
Ct	0.0138252
Relative Fold	0.166644
Fold Incr	1.71232
Hyt+ SOC	Bmp2	PPIA	∆Ct	Hyt+ FH	Bmp2	PPIA	∆Ct	∆∆Ct	Fold ∆
1	23.1241	15.653	7.47114	1	22.666	15.5834	7.08261	-0.410583	1.32922
2	22.8688	15.6481	7.22069	2	24.1108	16.0048	8.10607	0.612877	0.653892
3	23.007	15.7194	7.28766	3	23.7434	15.6712	8.07223	0.579037	0.669411
4	23.4546	15.6593	7.7953	4	24.0922	15.9991	8.0931	0.599907	0.659797
5	23.2838	15.5524	7.73142	5	22.862	15.5202	7.34182	-0.151373	1.11063
6	23.1643	15.7113	7.45295	6
Average	23.1504	15.6572	7.49319	Average	23.4949	15.7557	7.73917	0.245973	0.88459
Median	23.1442	15.6561	7.46204	Median	23.7434	15.6712	8.07223	0.579037	0.669411
SD	0.205445	0.0598084	0.230923	SD	0.686573	0.231073	0.489839	0.489839	0.315772
SEM			0.0942741				0.199976		0.128913
	P value
Bmp2	0.268818
PPIA	0.33713
Ct	0.299711
Relative Fold	0.541419
Fold Incr	0.843247
Hyt+ SOC	Vegfa	PPIA	∆Ct	Hyt+ FH	Vegfa	PPIA	∆Ct	∆∆Ct	Fold ∆
1				1	21.324	15.643	5.68097	0.165929	0.891354
2				2	21.9263	16.2212	5.70506	0.190019	0.876594
3	21.5254	15.7971	5.72832	3	21.414	15.8063	5.60769	0.0926489	0.937799
4	21.4865	15.8616	5.62489	4	21.8164	16.2288	5.58767	0.0726289	0.950904
5	20.9627	15.6583	5.30434	5	21.7144	15.5344	6.18007	0.665029	0.630676
6	21.1705	15.7679	5.40262	6
Average	21.2863	15.7712	5.51504	Average	21.639	15.8867	5.75229	0.237251	0.857466
Median	21.3285	15.7825	5.51375	Median	21.7144	15.8063	5.68097	0.165929	0.891354
SD	0.26793	0.0848256	0.195441	SD	0.259595	0.323606	0.244091	0.244091	0.130511
SEM			0.0797886				0.0996498		0.0532807
	P value
Vegfa	0.0858853
PPIA	0.514566
Ct	0.159229
Relative Fold	0.23169
Fold Incr	0.84836
Hyt+ SOC	Sox9(FB)	PPIA	∆Ct	Hyt+ FH	Sox9(FB)	PPIA	∆Ct	∆∆Ct	Fold ∆
1				1	18.8998	15.5834	3.31645	0.135822	0.910151
2				2	19.4341	16.0048	3.42929	0.248662	0.841677
3	19.0397	15.7971	3.24268	3	20.2259	15.6712	4.55479	1.37416	0.385777
4	19.1824	15.8616	3.32084	4	20.0178	15.9991	4.01878	0.838152	0.55936
5	18.7588	15.6583	3.10049	5	18.7467	15.5202	3.22651	0.0458819	0.968697
6	18.8264	15.7679	3.0585	6
Average	18.9519	15.7712	3.18063	Average	19.4649	15.7557	3.70916	0.528536	0.733132
Median	18.9331	15.7825	3.17159	Median	19.4341	15.6712	3.42929	0.248662	0.841677
SD	0.19483	0.0848256	0.122265	SD	0.655938	0.231073	0.564901	0.564901	0.249731
SEM			0.0499144				0.23062		0.101952
	P value
Sox9(FB)	0.178896
PPIA	0.903062
Ct	0.112637
Relative Fold	1.19561
Fold Incr	0.693258
Hyt+ SOC	Sp7	PPIA	∆Ct	Hyt+ FH	Sp7(SC)	PPIA	∆Ct	∆∆Ct	Fold ∆
1	22.3673	16.0312	6.33618	1	22.0041	15.643	6.36104	0.216856	0.860438
2				2	23.6096	16.2212	7.38841	1.24423	0.422134
3	21.9325	16.2049	5.72758	3	22.142	15.8063	6.33568	0.191496	0.875697
4	22.1625	15.8294	6.3331	4	23.5066	16.2288	7.2778	1.13362	0.455772
5	21.7902	15.9512	5.839	5	23.1435	15.5344	7.60909	1.46491	0.362259
6	22.4765	15.9914	6.48505	6	23.324	16.1893	7.13466	0.990476	0.503312
Average	22.1458	16.0016	6.14418	Average	22.9549	15.9372	7.01778	0.873596	0.579935
Median	22.1625	15.9914	6.3331	Median	23.2337	15.9978	7.20623	1.06205	0.479542
SD	0.287537	0.136472	0.337431	SD	0.702809	0.3147	0.541268	0.541268	0.227916
SEM			0.150904				0.220972		0.101927
	P value
Sp7	0.0401918
PPIA	0.682174
Ct	0.0122534
Relative Fold	2.00184
Fold Incr	0.545785
Hyt+ SOC	Col2a1	PPIA	∆Ct	Hyt+ FH	Col2a1	PPIA	∆Ct	∆∆Ct	Fold ∆
1				1	13.8735	15.643	-1.76954	-0.0517291	1.03651
2				2	13.9545	16.2212	-2.26667	-0.548859	1.46293
3	14.054	15.7971	-1.74302	3
4	14.0997	15.8616	-1.76189	4	14.2237	16.2288	-2.00507	-0.287259	1.22032
5	14.0507	15.6583	-1.60763	5	13.935	15.5344	-1.59941	0.118401	0.921208
6	14.0092	15.7679	-1.75871	6	13.9441	16.1893	-2.24523	-0.527419	1.44135
Average	14.0534	15.7712	-1.71781	Average	13.9862	15.9633	-1.97718	-0.259373	1.21646
Median	14.0524	15.7825	-1.75086	Median	13.9441	16.1893	-2.00507	-0.287259	1.22032
SD	0.0369854	0.0848256	0.0739166	SD	0.136474	0.344464	0.292514	0.292514	0.240257
SEM			0.0301763				0.119418		0.0980844
	P value
Col2a1	0.375511
PPIA	0.317776
Ct	0.131357
Relative Fold	0.00109831
Fold Incr	1.19696
Hyt+ SOC	Col10a1	PPIA	∆Ct	Hyt+ FH	Col10a1	PPIA	∆Ct	∆∆Ct	Fold ∆
1				1	15.4932	15.643	-0.14988	0.0435169	0.970287
2				2	15.945	16.2212	-0.27622	-0.0828231	1.05909
3	15.6155	15.7971	-0.181516	3	15.7408	15.8063	-0.06545	0.127947	0.915133
4	15.6397	15.8616	-0.221855	4
5	15.4796	15.6583	-0.178719	5	15.8889	15.5344	0.3545	0.547897	0.684017
6	15.5764	15.7679	-0.191498	6	15.8782	16.1893	-0.31115	-0.117753	1.08504
Average	15.5778	15.7712	-0.193397	Average	15.7892	15.8788	-0.08964	0.103757	0.942714
Median	15.596	15.7825	-0.186507	Median	15.8782	15.8063	-0.14988	0.0435169	0.970287
SD	0.0704753	0.0848256	0.0197492	SD	0.181728	0.313508	0.267092	0.267092	0.15988
SEM			0.00806258				0.10904		0.0652706
	P value
Col10a1	0.0661952
PPIA	0.530948
Ct	0.469549
Relative Fold	0.137529
Fold Incr	0.930606
Hyt+ SOC	Ibsp	PPIA	∆Ct	Hyt+ FH	Ibsp	PPIA	∆Ct	∆∆Ct	Fold ∆
1	15.9945	15.653	0.34152	1	15.5859	15.643	-0.05715	-0.1397	1.10168
2	15.9833	15.6481	0.33518	2	17.1486	16.2212	0.92739	0.84484	0.556773
3	15.6397	15.7194	-0.07971	3
4	15.6526	15.6593	-0.00664	4	16.9064	16.2288	0.67762	0.59507	0.662012
5	15.5861	15.5524	0.0337	5	16.4033	15.5344	0.86898	0.78643	0.579777
6	15.5826	15.7113	-0.12875	6	16.3889	16.1893	0.1996	0.11705	0.922071
Average	15.7398	15.6572	0.08255	Average	16.4866	15.9633	0.523288	0.440738	0.764462
Median	15.6462	15.6561	0.01353	Median	16.4033	16.1893	0.67762	0.59507	0.662012
SD	0.194995	0.0598084	0.206012	SD	0.600462	0.344464	0.432522	0.432522	0.237851
SEM			0.084104				0.176576		0.0971025
	P value
Ibsp	0.0177102
PPIA	0.0589869
Ct	0.0528688
Relative Fold	0.762583
Fold Incr	0.736758
Hyt+ SOC	Mmp13	PPIA	∆Ct	Hyt+ FH	Mmp13	PPIA	∆Ct	∆∆Ct	Fold ∆
1				1	16.9122	15.643	1.26913	0.34193	0.788985
2				2	18.6325	16.2212	2.41131	1.48411	0.357469
3	16.7101	15.7971	0.91307	3
4	16.7556	15.8616	0.894015	4	18.4767	16.2288	2.248	1.3208	0.400313
5	16.6192	15.6583	0.960883	5	18.1846	15.5344	2.65027	1.72307	0.302904
6	16.7088	15.7679	0.940833	6	18.169	16.1893	1.97972	1.05252	0.482125
Average	16.6984	15.7712	0.9272	Average	18.075	15.9633	2.11169	1.18449	0.466359
Median	16.7094	15.7825	0.926952	Median	18.1846	16.1893	2.248	1.3208	0.400313
SD	0.0571126	0.0848256	0.0295595	SD	0.679205	0.344464	0.530506	0.530506	0.191881
SEM			0.0120676				0.216578		0.078335
	P value
Mmp13	0.00528138
PPIA	0.317776
Ct	0.00316482
Relative Fold	2.94119
Fold Incr	0.439981
Hyt+ SOC	Alpl	PPIA	∆Ct	Hyt+ FH	Alpl	PPIA	∆Ct	∆∆Ct	Fold ∆
1				1	17.8769	15.643	2.23383	0.314116	0.804344
2				2	18.5255	16.2212	2.30426	0.384546	0.76602
3	17.7184	15.7971	1.92138	3
4	17.8816	15.8616	2.02004	4	19.5406	16.2288	3.3119	1.39219	0.380987
5	17.6381	15.6583	1.97977	5	18.1457	15.5344	2.61138	0.691666	0.619139
6	17.5256	15.7679	1.75767	6	18.5096	16.1893	2.32029	0.400576	0.757556
Average	17.6909	15.7712	1.91971	Average	18.5197	15.9633	2.55633	0.636618	0.665609
Median	17.6783	15.7825	1.95057	Median	18.5096	16.1893	2.32029	0.400576	0.757556
SD	0.14972	0.0848256	0.115372	SD	0.631576	0.344464	0.446424	0.446424	0.173892
SEM			0.0576858				0.182252		0.0709909
	P value
Alpl	0.0389625
PPIA	0.317776
Ct	0.0287396
Relative Fold	1.17298
Fold Incr	0.643219
Hyt+ SOC	Acp5	PPIA	∆Ct	Hyt+ FH	Acp5	PPIA	∆Ct	∆∆Ct	Fold ∆
1				1	15.8561	15.643	0.21302	-0.879261	1.83943
2				2	17.5379	16.2212	1.31665	0.224369	0.855969
3	16.92	15.7971	1.12298	3
4	16.913	15.8616	1.05139	4	16.7159	16.2288	0.48714	-0.605141	1.52113
5	16.6616	15.6583	1.00323	5	16.8867	15.5344	1.35239	0.260109	0.835025
6	16.9594	15.7679	1.19153	6	16.7045	16.1893	0.51521	-0.577071	1.49182
Average	16.8635	15.7712	1.09228	Average	16.7402	15.9633	0.776882	-0.315399	1.30867
Median	16.9165	15.7825	1.08718	Median	16.7159	16.1893	0.51521	-0.577071	1.49182
SD	0.136165	0.0848256	0.0824488	SD	0.600275	0.344464	0.522715	0.522715	0.444316
SEM			0.0336596				0.213397		0.181391
	P value
Acp5	0.702878
PPIA	0.317776
Ct	0.276935
Relative Fold	0.0429797
Fold Incr	1.24436

## Sheet: 21d
Source Data for Figure 3I
Hyt#19 - 21d SOC
Hyt#19& 20 - 21d FH
Hyt+ SOC	Shh	PPIA	∆Ct	Hyt+ FH	Shh	PPIA	∆Ct	∆∆Ct	Fold ∆
171	24.6981	14.9188	9.77927	171	25.3231	15.724	9.59909	-0.20488	1.15259
172	24.5082	14.965	9.54319	172	25.2529	15.6912	9.56165	-0.242322	1.1829
174	24.6516	14.9346	9.71702	174	24.8787	15.5933	9.28537	-0.518602	1.43257
179	24.1974	14.7284	9.46901	179	26.4157	16.6952	9.72048	-0.0834918	1.05958
180	26.015	15.4164	10.5986	180	25.4008	15.5043	9.89654	0.0925698	0.937851
181	24.7812	14.7369	10.0443	181	24.8495	16.2536	8.59587	-1.2081	2.31033
182				182
183	24.5966	15.1202	9.47642	183	24.4565	15.6944	8.76214	-1.04182	2.05883
Average	24.7783	14.9743	9.80397	Average	25.2253	15.8794	9.34588	-0.458093	1.44781
Median	24.6516	14.9346	9.71702	Median	25.2529	15.6944	9.56165	-0.242322	1.1829
SD	0.576682	0.237452	0.405138	SD	0.62057	0.432434	0.493481	0.493481	0.530037
SEM			0.202569				0.201463		0.216387
	P value
Shh	0.346571
PPIA	0.0907128
Ct	0.148818
Relative Fold	0.108863
Fold Incr	1.8187
Hyt+ SOC	Ihh	PPIA	∆Ct	Hyt+ FH	Ihh	PPIA	∆Ct	∆∆Ct	Fold ∆
171	21.284	14.9188	6.36522	171	20.4111	15.724	4.68709	-1.44206	2.71708
172	21.3334	14.965	6.36845	172	19.9857	15.6912	4.29448	-1.83466	3.56687
174	20.7772	14.9346	5.84267	174	20.3873	15.5933	4.794	-1.33514	2.52299
179	20.8173	14.7284	6.08894	179
180				180	19.9619	15.5043	4.45769	-1.67146	3.18536
181	20.698	14.7369	5.96107	181
182				182	20.3222	16.1729	4.1493	-1.97984	3.94449
183	21.2687	15.1202	6.1485	183	19.895	15.6944	4.20064	-1.92851	3.80661
Average	21.0298	14.9006	6.12914	Average	20.1605	15.73	4.43053	-1.69861	3.29057
Median	21.043	14.9267	6.11872	Median	20.154	15.6928	4.37608	-1.75306	3.37612
SD	0.294237	0.148509	0.212277	SD	0.237009	0.23178	0.264243	0.264243	0.58299
SEM			0.106139				0.107877		0.238005
	P value
Ihh	0.000216785
PPIA	2.36939e-05
Ct	2.35937e-07
Relative Fold	2.05741
Fold Incr	3.24588
Hyt+ SOC	Tnfsf11	PPIA	∆Ct	Hyt+ FH	Tnfsf11	PPIA	∆Ct	∆∆Ct	Fold ∆
171	22.7441	14.9934	7.75076	171	24.3632	16.1772	8.18606	0.786593	0.579712
172	23.3033	15.104	8.19927	172	23.9146	15.8431	8.0715	0.672033	0.627622
174	21.8181	14.8197	6.99842	174	23.9611	15.7489	8.21224	0.812773	0.569287
179	21.8367	14.7327	7.10391	179	24.4448	17.0144	7.43039	0.0309229	0.978794
180	22.3832	15.304	7.07917	180	23.8092	15.7317	8.0775	0.678033	0.625017
181				181
182	22.656	15.0817	7.57438	182
183	22.4234	15.3331	7.09036	183	23.7716	15.8225	7.9491	0.549633	0.683194
Average	22.4521	15.0527	7.39947	Average	24.0441	16.0563	7.9878	0.588331	0.677271
Median	22.4234	15.0817	7.10391	Median	23.9379	15.8328	8.0745	0.675033	0.626319
SD	0.522438	0.225612	0.454609	SD	0.288271	0.4965	0.288768	0.288768	0.153183
SEM			0.185593				0.117889		0.0625367
	P value
Tnfsf11	3.74434e-05
PPIA	0.000532115
Ct	0.0197653
Relative Fold	0.769304
Fold Incr	0.665112
Hyt+ SOC	Tnfrsf11b	PPIA	∆Ct	Hyt+ FH	Tnfrsf11b	PPIA	∆Ct	∆∆Ct	Fold ∆
171	20.5858	14.9934	5.5924	171	20.6994	16.1772	4.52229	-1.07924	2.11293
172	20.9528	15.104	5.84876	172	20.4197	15.8431	4.57666	-1.02487	2.03478
174	20.4516	14.8197	5.63188	174	20.4466	15.7489	4.69767	-0.903863	1.87107
179	19.8452	14.7327	5.11245	179	21.2918	17.0144	4.27738	-1.32415	2.50386
180	20.7035	15.304	5.39951	180
181	20.6203	14.7973	5.82298	181
182	20.8844	15.0817	5.80275	182	21.6099	16.6989	4.91103	-0.690503	1.61385
183				183	20.259	15.8225	4.4365	-1.16503	2.24238
Average	20.5777	14.9761	5.60153	Average	20.7877	16.2175	4.57026	-1.03128	2.06314
Median	20.6203	14.9934	5.63188	Median	20.573	16.0101	4.54947	-1.05206	2.07385
SD	0.366272	0.204526	0.268225	SD	0.542076	0.52616	0.218344	0.218344	0.306072
SEM			0.109502				0.0891385		0.124953
	P value
Tnfrsf11b	0.423943
PPIA	0.000121572
Ct	1.18428e-05
Relative Fold	0.660862
Fold Incr	2.04383
Hyt+ SOC	Bmp2	PPIA	∆Ct	Hyt+ FH	Bmp2	PPIA	∆Ct	∆∆Ct	Fold ∆
171	24.3092	14.945	9.36413	171
172	24.1623	14.9671	9.19527	172	24.3529	15.8444	8.5085	-0.757111	1.6901
174	24.1253	14.8673	9.25799	174	24.5732	15.7154	8.85777	-0.407841	1.3267
179	24.3642	14.7334	9.63077	179	24.957	16.9613	7.99571	-1.2699	2.41145
180				180	23.6336	15.7756	7.85804	-1.40757	2.6529
181	23.8157	14.7829	9.03279	181
182	24.2807	15.1313	9.14933	182	25.2237	16.8148	8.40894	-0.856671	1.81086
183	24.5025	15.2735	9.229	183	23.6385	15.8733	7.76517	-1.50044	2.82929
Average	24.2228	14.9572	9.26561	Average	24.3965	16.1641	8.23236	-1.03326	2.12022
Median	24.2807	14.945	9.229	Median	24.4631	15.8589	8.20233	-1.06329	2.11115
SD	0.21907	0.191124	0.190228	SD	0.66154	0.565319	0.427307	0.427307	0.596947
SEM			0.0776603				0.174447		0.243703
	P value
Bmp2	0.524107
PPIA	0.000238309
Ct	0.000120284
Relative Fold	0.367175
Fold Incr	2.04664
Hyt+ SOC	Vegfa	PPIA	∆Ct	Hyt+ FH	Vegfa	PPIA	∆Ct	∆∆Ct	Fold ∆
171	21.8409	14.9934	6.84749	171	22.6365	16.1772	6.45931	-0.169708	1.12483
172	22.1487	15.104	7.04469	172	21.7702	15.8431	5.92709	-0.701928	1.62668
174	21.4098	14.8197	6.59007	174	22.1264	15.7489	6.37754	-0.251478	1.19043
179	20.8863	14.7327	6.15352	179
180	21.651	15.304	6.34701	180	22.3382	15.7317	6.60649	-0.0225275	1.01574
181	21.1593	14.7973	6.362	181
182	21.855	15.0817	6.77332	182	22.7123	16.6989	6.01339	-0.615627	1.53222
183	22.2471	15.3331	6.91404	183	21.6767	15.8225	5.85426	-0.774757	1.7109
Average	21.6498	15.0207	6.62902	Average	22.21	16.0037	6.20635	-0.422671	1.3668
Median	21.746	15.0375	6.6817	Median	22.2323	15.8328	6.19547	-0.433552	1.36132
SD	0.472904	0.227553	0.316457	SD	0.432525	0.377076	0.313877	0.313877	0.291962
SEM			0.129193				0.12814		0.119193
	P value
Vegfa	0.0422452
PPIA	5.45473e-05
Ct	0.0288774
Relative Fold	0.0118361
Fold Incr	1.34041
Hyt+ SOC	Sox9(FB)	PPIA	∆Ct	Hyt+ FH	Sox9(FB)	PPIA	∆Ct	∆∆Ct	Fold ∆
171				171
172	20.3579	14.9671	5.39081	172	19.7749	15.8444	3.93051	-1.04146	2.05831
174	19.5166	14.8673	4.64931	174	20.4532	15.7154	4.73775	-0.23422	1.17627
179	19.3483	14.7334	4.61486	179
180				180	20.1612	15.7756	4.3856	-0.58637	1.50146
181	19.4671	14.7829	4.68417	181
182	20.4468	15.1313	5.31544	182	20.5285	16.8148	3.7137	-1.25827	2.39209
183	20.4507	15.2735	5.17723	183	19.5326	15.8733	3.65928	-1.31269	2.48404
Average	19.9312	14.9592	4.97197	Average	20.0901	16.0047	4.08537	-0.886602	1.92243
Median	19.9372	14.9172	4.9307	Median	20.1612	15.8444	3.93051	-1.04146	2.05831
SD	0.537569	0.209283	0.360554	SD	0.429885	0.456983	0.463522	0.463522	0.567542
SEM			0.147196				0.189232		0.231698
	P value
Sox9(FB)	0.607242
PPIA	0.000695668
Ct	0.00597461
Relative Fold	0.178997
Fold Incr	1.84882
Hyt+ SOC	Sp7	PPIA	∆Ct	Hyt+ FH	Sp7	PPIA	∆Ct	∆∆Ct	Fold ∆
171				5
172	21.6071	14.965	6.64216	6	20.6278	15.4724	5.15536	-1.36925	2.58337
174	21.5159	14.9346	6.58131	8	21.1911	15.5328	5.65825	-0.866363	1.82306
179				9	21.2714	15.5884	5.68295	-0.841663	1.79212
180	21.5122	15.4164	6.09582	10	20.8218	15.679	5.14282	-1.38179	2.60592
181	20.9507	14.7369	6.21379	82	21.6817	15.881	5.80068	-0.723937	1.65168
182	21.9184	15.0211	6.89732	83	21.1427	15.8478	5.29488	-1.22974	2.34524
183	21.8375	15.1202	6.71729
Average	21.557	15.0324	6.52461	Average	21.1227	15.6669	5.45582	-1.06879	2.13357
Median	21.5615	14.993	6.61174	Median	21.1669	15.6337	5.47656	-1.04805	2.08415
SD	0.341475	0.226589	0.307748	SD	0.367455	0.167741	0.291767	0.291767	0.427893
SEM			0.137629				0.119113		0.191359
	P value
Sp7	0.0599831
PPIA	0.000256916
Ct	0.000105038
Relative Fold	0.603766
Fold Incr	2.09768
Hyt+ SOC	Col2a1	PPIA	∆Ct	Hyt+ FH	Col2a1	PPIA	∆Ct	∆∆Ct	Fold ∆
171	14.036	14.9188	-0.88279	171	14.1037	15.724	-1.62034	-0.784123	1.72205
172	14.0851	14.965	-0.87992	172	13.9361	15.6912	-1.75512	-0.918904	1.89068
174	14.0581	14.9346	-0.87642	174	13.9828	15.5933	-1.61056	-0.774341	1.71041
179	13.9751	14.7284	-0.75326	179	14.7698	16.6952	-1.92543	-1.08921	2.12758
180				180	13.9969	15.5043	-1.50732	-0.671104	1.59229
181	14.0626	14.7369	-0.674334	181
182	14.223	15.0211	-0.79812	182
183	14.1315	15.1202	-0.98868	183	13.9622	15.6944	-1.73211	-0.895889	1.86076
Average	14.0816	14.9178	-0.836218	Average	14.1253	15.8171	-1.69181	-0.855595	1.81729
Median	14.0626	14.9346	-0.87642	Median	13.9898	15.6928	-1.67622	-0.840006	1.7914
SD	0.0783214	0.143007	0.102859	SD	0.320946	0.437869	0.145571	0.145571	0.186908
SEM			0.0419919				0.0594293		0.0763047
	P value
Col2a1	0.73283
PPIA	0.000315737
Ct	8.35899e-08
Relative Fold	0.504134
Fold Incr	1.80951
Hyt+ SOC	Col10a1	PPIA	∆Ct	Hyt+ FH	Col10a1	PPIA	∆Ct	∆∆Ct	Fold ∆
171	15.8849	14.9188	0.96611	171	15.2673	15.724	-0.456741	-1.2598	2.39462
172				172	14.9606	15.6912	-0.730622	-1.53368	2.89523
174	15.8223	14.9346	0.88774	174	15.2031	15.5933	-0.390239	-1.19329	2.28674
179	15.772	14.7284	1.04357	179
180	15.7033	15.4164	0.2869	180	15.1374	15.5043	-0.366861	-1.16992	2.24999
181	15.5371	14.7369	0.800136	181
182				182	15.4879	16.1729	-0.685027	-1.48808	2.80516
183	15.954	15.1202	0.83388	183	15.104	15.6944	-0.590387	-1.39344	2.62705
Average	15.7789	14.9759	0.803056	Average	15.1934	15.73	-0.536646	-1.3397	2.54313
Median	15.7971	14.9267	0.86081	Median	15.1702	15.6928	-0.523564	-1.32662	2.51083
SD	0.146991	0.260077	0.267948	SD	0.177531	0.23178	0.154388	0.154388	0.273276
SEM			0.109389				0.0630287		0.111564
	P value
Col10a1	9.84374e-05
PPIA	0.000346284
Ct	9.20096e-07
Relative Fold	1.40497
Fold Incr	2.53099
Hyt+ SOC	Ibsp	PPIA	∆Ct	Hyt+ FH	Ibsp	PPIA	∆Ct	∆∆Ct	Fold ∆
171	15.7834	14.9934	0.78997	171	16.3375	16.1772	0.1603	-0.900189	1.86631
172	16.3808	15.104	1.27675	172
174	15.8618	14.8197	1.04209	174	16.1586	15.7489	0.40972	-0.650769	1.57
179	15.7741	14.7327	1.04136	179	17.7683	17.0144	0.75392	-0.306569	1.23676
180				180	16.2958	15.7317	0.56411	-0.496379	1.41067
181	15.5729	14.7973	0.77555	181
182	16.4155	15.0817	1.3338	182	17.2046	16.6989	0.50574	-0.554749	1.46891
183	16.497	15.3331	1.1639	183	16.1654	15.8225	0.34294	-0.717549	1.64439
Average	16.0408	14.9803	1.06049	Average	16.655	16.1989	0.456122	-0.604367	1.53284
Median	15.8618	14.9934	1.04209	Median	16.3166	15.9998	0.45773	-0.602759	1.51946
SD	0.376929	0.212425	0.218799	SD	0.671938	0.543687	0.202623	0.202623	0.215267
SEM			0.0893241				0.0827206		0.0878826
	P value
Ibsp	0.062072
PPIA	0.000188018
Ct	0.000326371
Relative Fold	0.161398
Fold Incr	1.52031
Hyt+ SOC	Mmp13	PPIA	∆Ct	Hyt+ FH	Mmp13	PPIA	∆Ct	∆∆Ct	Fold ∆
171	16.6298	14.9934	1.63638	171	17.5616	16.1772	1.3844	-0.522727	1.43667
172	17.4971	15.104	2.3931	172	17.293	15.8431	1.44987	-0.457257	1.37293
174	16.2126	14.8197	1.39283	174	17.7196	15.7489	1.9707	0.0635729	0.956891
179	16.4807	14.7327	1.74796	179	18.9977	17.0144	1.98332	0.0761929	0.948558
180				180
181	16.9061	14.7973	2.10883	181
182	17.076	15.0817	1.99437	182	18.562	16.6989	1.8631	-0.0440271	1.03099
183	17.4095	15.3331	2.07642	183	17.5911	15.8225	1.76859	-0.138537	1.10079
Average	16.8874	14.9803	1.90713	Average	17.9541	16.2175	1.73666	-0.170464	1.14114
Median	16.9061	14.9934	1.99437	Median	17.6553	16.0101	1.81584	-0.0912821	1.06589
SD	0.477398	0.212425	0.335724	SD	0.668826	0.52616	0.260368	0.260368	0.212537
SEM			0.137059				0.106295		0.086768
	P value
Mmp13	0.00648063
PPIA	0.000131587
Ct	0.334857
Relative Fold	0.00808281
Fold Incr	1.12542
Hyt+ SOC	Alpl	PPIA	∆Ct	Hyt+ FH	Alpl	PPIA	∆Ct	∆∆Ct	Fold ∆
171	16.6737	14.9188	1.75489	171	17.6046	15.724	1.88058	-0.0963719	1.06908
172	17.3137	14.965	2.34871	172
174	17.0768	14.9346	2.14219	174	17.3749	15.5933	1.7816	-0.19535	1.145
179	16.5527	14.7284	1.82436	179	18.4439	16.6952	1.74868	-0.228269	1.17143
180				180	17.3537	15.5043	1.84942	-0.127532	1.09242
181	16.66	14.7369	1.92302	181	17.8155	16.2536	1.56191	-0.415043	1.33334
182				182	17.7404	16.1729	1.56748	-0.409468	1.3282
183	16.9887	15.1202	1.86854	183	17.2912	15.6944	1.5968	-0.380148	1.30148
Average	16.8776	14.9006	1.97695	Average	17.6606	15.9482	1.71235	-0.264598	1.20585
Median	16.8312	14.9267	1.89578	Median	17.6046	15.724	1.74868	-0.228269	1.17143
SD	0.295517	0.148509	0.22484	SD	0.399874	0.435805	0.135508	0.135508	0.113155
SEM			0.11242				0.0553211		0.0461954
	P value
Alpl	0.00227029
PPIA	0.000163633
Ct	0.0239016
Relative Fold	0.016664
Fold Incr	1.2013
Hyt+ SOC	Acp5	PPIA	∆Ct	Hyt+ FH	Acp5	PPIA	∆Ct	∆∆Ct	Fold ∆
171	15.1785	14.9934	0.18513	171	15.7711	16.1772	-0.40607	-0.772043	1.70769
172	15.634	15.104	0.52994	172	15.5312	15.8431	-0.31188	-0.677853	1.59976
174	15.1472	14.8197	0.32751	174	15.8505	15.7489	0.10159	-0.264383	1.20112
179	14.9021	14.7327	0.16934	179	16.8214	17.0144	-0.19294	-0.558913	1.47316
180				180
181	15.2414	14.7973	0.44409	181
182	15.5647	15.0817	0.48305	182	16.2656	16.6989	-0.43326	-0.799233	1.74018
183	15.7558	15.3331	0.42275	183	15.9559	15.8225	0.13345	-0.232523	1.17489
Average	15.3462	14.9803	0.365973	Average	16.0326	16.2175	-0.184852	-0.550825	1.4828
Median	15.2414	14.9934	0.42275	Median	15.9032	16.0101	-0.25241	-0.618383	1.53646
SD	0.309371	0.212425	0.143042	SD	0.455065	0.52616	0.249083	0.249083	0.246877
SEM			0.0583967				0.101688		0.100787
	P value
Acp5	0.00808524
PPIA	0.000131587
Ct	0.000408711
Relative Fold	0.0910482
Fold Incr	1.46492
