# Supplementary material for: Differences in pathways contributing to thyroid hormone effects on postnatal cartilage calcification versus secondary ossification center development
Source: eLife. 2022 Jan 31;11:e76730. doi: 10.7554/eLife.76730 (PMC8830887; doi:10.7554/eLife.76730)
Supplement: Figure 9—figure supplement 1—source data 1. [file elife-76730-fig9-figsupp1-data1.xlsx]

## Sheet: Sox9
Soure Data for Figure 9- figure supplement 1 (RUNX2 shRNA)
2018#23 - Control and Runx2 #90 shRNA (mission) 3d treatment BG, BAA, TH & BAA/TH									2021-04-19	PPIA
ATDC5 cells - Hit with virus 1x, hit with puro									2021-04-23	Sox9
10% FBS then switched to 5% FBS									threshold 0.04
RT done by GG
1ug of RNA used for RT
Cntrl shRNA	Sox9	PPIA	∆Ct	Runx2 #90	Sox9	PPIA	∆Ct	∆∆Ct	Fold ∆
BG 1	18.2249	14.6096	3.61533	BG 1	19.1249	14.6343	4.49065	0.914546	0.530511
BG 2	17.9637	14.5932	3.37044	BG 2	18.683	14.559	4.12398	0.547878	0.684026
BG 3	18.2398	14.5603	3.67958	BG 3	18.7574	14.5751	4.18227	0.606159	0.656943
BG 4	18.2437	14.6047	3.63907	BG 4	18.7836	14.5639	4.21967	0.643559	0.640132
Average	18.168	14.5919	3.57611	Average	18.8372	14.5831	4.25414	0.678035	0.627903
Median	18.2324	14.5989	3.6272	Median	18.7705	14.5695	4.20097	0.624859	0.648538
SD	0.136494	0.0222024	0.139654	SD	0.196486	0.0347956	0.162515	0.162515	0.0673991
	P value								0.0336995
Sox9	0.00138844
PPIA	0.682468
Ct	0.000727834
Relative Fold	0.706525
Fold Incr	0.625016

## Sheet: Runx2
Soure Data for Figure 9- figure supplement 1 (RUNX2 shRNA)
2018#23 - Control and Runx2 #90 shRNA (mission) 3d treatment BG, BAA, TH & BAA/TH									2018-12-20	PPIA
ATDC5 cells - Hit with virus 1x, hit with puro									2018-12-20	Runx2
10% FBS then switched to 5% FBS									threshold 0.04	JL
Cntrl shRNA	Runx2	PPIA	∆Ct	Runx2 #90	Runx2	PPIA	∆Ct	∆∆Ct	Fold ∆
BG 1	17.6904	14.4135	3.27684	BG 1	18.7776	14.3942	4.38342	1.14187	0.453173
BG 2	17.5891	14.3998	3.18932	BG 2	18.8479	14.3669	4.48096	1.23941	0.423547
BG 3	17.6594	14.3598	3.29957	BG 3	18.7985	14.3193	4.47916	1.23761	0.424075
BG 4	17.5351	14.3346	3.20047	BG 4	18.6264	14.2927	4.3337	1.09215	0.469063
Average	17.6185	14.3769	3.24155	Average	18.7626	14.3433	4.41931	1.17776	0.442464
Median	17.6243	14.3798	3.23865	Median	18.788	14.3431	4.43129	1.18974	0.438624
SD	0.0698909	0.0362574	0.0548549	SD	0.0954462	0.0457638	0.0730299	0.0730299	0.0224959
	P value								0.0112479
Runx2	1.23625e-06
PPIA	0.292702
Ct	2.24092e-07
Relative Fold	1.56447
Fold Incr	0.442038

## Sheet: Dlx3
Soure Data for Figure 9- figure supplement 1 (RUNX2 shRNA)
2018#23 - Control and Runx2 #90 shRNA (mission) 3d treatment BG, BAA, TH & BAA/TH									2021-04-19	PPIA
ATDC5 cells - Hit with virus 1x, hit with puro									2021-05-03	Dlx3
10% FBS then switched to 5% FBS									threshold 0.04
RT done by GG
1ug of RNA used for RT
Cntrl shRNA	Dlx3	PPIA	∆Ct	Runx2 #90	Dlx3	PPIA	∆Ct	∆∆Ct	Fold ∆
BG 1	30.401	14.6096	15.7914	BG 1
BG 2	29.8922	14.5932	15.2989	BG 2	28.7336	14.559	14.1746	-1.32349	2.50271
BG 3	30.4826	14.5603	15.9223	BG 3	29.8405	14.5751	15.2654	-0.232661	1.175
BG 4	29.5843	14.6047	14.9797	BG 4	29.2817	14.5639	14.7178	-0.780247	1.71742
Average	30.09	14.5919	15.4981	Average	29.2853	14.566	14.7193	-0.7788	1.79838
Median	30.1466	14.5989	15.5452	Median	29.2817	14.5639	14.7178	-0.780247	1.71742
SD	0.426493	0.0222024	0.437581	SD	0.553474	0.00825171	0.545418	0.545418	0.667549
	P value								0.333774
Dlx3	0.0801911
PPIA	0.11745
Ct	0.0887913
Relative Fold	0.0544674
Fold Incr	1.7157

## Sheet: Dlx5
Soure Data for Figure 9- figure supplement 1 (RUNX2 shRNA)
2018#23 - Control and Runx2 #90 shRNA (mission) 3d treatment BG, BAA, TH & BAA/TH									2021-04-19	PPIA
ATDC5 cells - Hit with virus 1x, hit with puro									2021-04-23	Dlx5
10% FBS then switched to 5% FBS									threshold 0.04
RT done by GG
1ug of RNA used for RT
Cntrl shRNA	Dlx5	PPIA	∆Ct	Runx2 #90	Dlx5	PPIA	∆Ct	∆∆Ct	Fold ∆
BG 1	20.5186	14.6096	5.90899	BG 1	20.7252	14.6343	6.0909	0.228039	0.853795
BG 2	20.4672	14.5932	5.87396	BG 2	20.4716	14.559	5.91257	0.0497053	0.966134
BG 3	20.3443	14.5603	5.78406	BG 3	20.8723	14.5751	6.29722	0.434363	0.74002
BG 4	20.4891	14.6047	5.88444	BG 4	20.431	14.5639	5.86711	0.00424838	0.99706
Average	20.4548	14.5919	5.86286	Average	20.625	14.5831	6.04195	0.179089	0.889252
Median	20.4781	14.5989	5.8792	Median	20.5984	14.5695	6.00173	0.138872	0.909964
SD	0.0766031	0.0222024	0.054547	SD	0.21006	0.0347956	0.195679	0.195679	0.116991
	P value								0.0584954
Dlx5	0.178683
PPIA	0.682468
Ct	0.128323
Relative Fold	0.140451
Fold Incr	0.883261

## Sheet: Dlx6
Soure Data for Figure 9- figure supplement 1 (RUNX2 shRNA)
2018#23 - Control and Runx2 #90 shRNA (mission) 3d treatment BG, BAA, TH & BAA/TH									2021-04-19	PPIA
ATDC5 cells - Hit with virus 1x, hit with puro									2021-04-23	Dlx6
10% FBS then switched to 5% FBS									threshold 0.04
RT done by GG
1ug of RNA used for RT
Cntrl shRNA	Dlx6	PPIA	∆Ct	Runx2 #90	Dlx6	PPIA	∆Ct	∆∆Ct	Fold ∆
BG 1	21.0094	14.6096	6.39982	BG 1	21.2772	14.6343	6.64292	0.118744	0.920989
BG 2	21.3291	14.5932	6.73589	BG 2	21.22	14.559	6.66104	0.13686	0.909497
BG 3	21.1331	14.5603	6.57281	BG 3	21.2225	14.5751	6.64736	0.123187	0.918157
BG 4	20.9928	14.6047	6.38819	BG 4	20.9727	14.5639	6.40878	-0.115396	1.08327
Average	21.1161	14.5919	6.52418	Average	21.1731	14.5831	6.59003	0.0658486	0.957979
Median	21.0712	14.5989	6.48631	Median	21.2212	14.5695	6.64514	0.120965	0.919573
SD	0.155173	0.0222024	0.164465	SD	0.136188	0.0347956	0.121075	0.121075	0.0836718
	P value								0.0418359
Dlx6	0.600895
PPIA	0.682468
Ct	0.542871
Relative Fold	0.0349405
Fold Incr	0.955383

## Sheet: Sp7
Soure Data for Figure 9- figure supplement 1 (RUNX2 shRNA)
2018#23 - Control and Runx2 #90 shRNA (mission) 3d treatment BG, BAA, TH & BAA/TH									2021-04-19	PPIA
ATDC5 cells - Hit with virus 1x, hit with puro									2021-04-19	Sp7
10% FBS then switched to 5% FBS									threshold 0.04
RT done by GG
1ug of RNA used for RT
Cntrl shRNA	Sp7	PPIA	∆Ct	Runx2 #90	Sp7	PPIA	∆Ct	∆∆Ct	Fold ∆
BG 1	21.8656	14.6096	7.25596	BG 1	22.9326	14.6343	8.29834	1.16759	0.445166
BG 2	21.6815	14.5932	7.08829	BG 2	22.767	14.559	8.20803	1.07728	0.473921
BG 3	21.6398	14.5603	7.07952	BG 3	22.8929	14.5751	8.31779	1.18704	0.439203
BG 4	21.7039	14.6047	7.09924	BG 4	22.9233	14.5639	8.3594	1.22865	0.426716
Average	21.7227	14.5919	7.13075	Average	22.879	14.5831	8.29589	1.16514	0.446251
Median	21.6927	14.5989	7.09376	Median	22.9081	14.5695	8.30806	1.17731	0.442184
SD	0.0988852	0.0222024	0.0838637	SD	0.0765222	0.0347956	0.0638706	0.0638706	0.019984
	P value								0.00999202
Sp7	1.61116e-06
PPIA	0.682468
Ct	5.60253e-07
Relative Fold	1.51047
Fold Incr	0.445921

## Sheet: Col1a1
Soure Data for Figure 9- figure supplement 1 (RUNX2 shRNA)
2018#19 - Control and RUNX2#90 shRNA (mission) 3d treatment BAA & BAA/TH									2018-11-26	PPIA
ATDC5 cells - Hit with virus 1x, hit with puro									2018-12-12	Col1a1
10% FBS then switched to 5% FBS									0.04 threshold JL
Cntrl shRNA	Col1a1	PPIA	∆Ct	Runx2 #90	Col1a1	PPIA	∆Ct	∆∆Ct	Fold ∆
BG 1	26.3466	14.6096	11.737	BG 1	28.0159	14.6343	13.3816	1.96745	0.255704
BG 2	26.239	14.5932	11.6457	BG 2
BG 3	25.9947	14.5603	11.4344	BG 3	27.3884	14.5751	12.8133	1.39918	0.379145
BG 4	25.4441	14.6047	10.8394	BG 4	27.2736	14.5639	12.7097	1.29558	0.407374
Average	26.0061	14.5919	11.4142	Average	27.5593	14.5911	12.9682	1.55407	0.347408
Median	26.1168	14.5989	11.5401	Median	27.3884	14.5751	12.8133	1.39918	0.379145
SD	0.402557	0.0222024	0.403563	SD	0.399543	0.0378136	0.36173	0.36173	0.080662
	P value								0.040331
Col1a1	0.00387699
PPIA	0.971551
Ct	0.00331879
Relative Fold	3.67028
Fold Incr	0.340548

## Sheet: Col2a1
Soure Data for Figure 9- figure supplement 1 (RUNX2 shRNA)
2018#23 - Control and Runx2 #90 shRNA (mission) 3d treatment BG, BAA, TH & BAA/TH									2021-04-19	PPIA
ATDC5 cells - Hit with virus 1x, hit with puro									2021-05-05	Col2a1
10% FBS then switched to 5% FBS									threshold 0.04
RT done by GG
1ug of RNA used for RT
Cntrl shRNA	Col2a1	PPIA	∆Ct	Runx2 #90	Col2a1	PPIA	∆Ct	∆∆Ct	Fold ∆
BG 1	18.8133	14.6096	4.20368	BG 1	20.4164	14.6343	5.78218	1.20522	0.433702
BG 2	18.925	14.5932	4.33182	BG 2	20.5841	14.559	6.02513	1.44818	0.366483
BG 3	19.4166	14.5603	4.85637	BG 3	20.8675	14.5751	6.29237	1.71541	0.304515
BG 4	19.5206	14.6047	4.91594	BG 4	20.5422	14.5639	5.97826	1.40131	0.378585
Average	19.1689	14.5919	4.57695	Average	20.6026	14.5831	6.01949	1.44253	0.370822
Median	19.1708	14.5989	4.5941	Median	20.5631	14.5695	6.0017	1.42475	0.372534
SD	0.351665	0.0222024	0.36167	SD	0.190437	0.0347956	0.210168	0.210168	0.0530083
	P value								0.0265042
Col2a1	0.000371736
PPIA	0.682468
Ct	0.00045886
Relative Fold	2.73142
Fold Incr	0.367921

## Sheet: Col10a1
Soure Data for Figure 9- figure supplement 1 (RUNX2 shRNA)
2018#23 - Control and Runx2 #90 shRNA (mission) 3d treatment BG, BAA, TH & BAA/TH									2021-04-19	PPIA
ATDC5 cells - Hit with virus 1x, hit with puro									2021-04-30	Col10a1
10% FBS then switched to 5% FBS									threshold 0.04
RT done by GG
1ug of RNA used for RT
Cntrl shRNA	Col10a1	PPIA	∆Ct	Runx2 #90	Col10a1	PPIA	∆Ct	∆∆Ct	Fold ∆
BG 1	26.2042	14.6096	11.5946	BG 1	26.4413	14.6343	11.807	0.566154	0.675415
BG 2	25.6474	14.5932	11.0541	BG 2	26.6404	14.559	12.0814	0.840559	0.558427
BG 3	25.7549	14.5603	11.1946	BG 3	26.5206	14.5751	11.9455	0.704646	0.613593
BG 4	25.7246	14.6047	11.1199	BG 4	25.9342	14.5639	11.3703	0.129437	0.914188
Average	25.8328	14.5919	11.2408	Average	26.3841	14.5831	11.801	0.560199	0.690406
Median	25.7397	14.5989	11.1573	Median	26.4809	14.5695	11.8762	0.6354	0.644504
SD	0.251751	0.0222024	0.242758	SD	0.310919	0.0347956	0.308252	0.308252	0.156654
	P value								0.0783272
Col10a1	0.033018
PPIA	0.682468
Ct	0.0289722
Relative Fold	0.754207
Fold Incr	0.678209

## Sheet: Bglap2
Soure Data for Figure 9- figure supplement 1 (RUNX2 shRNA)
2018#23 - Control and RUNX2 #90 shRNA (mission) 3d treatment BG, BAA, TH & BAA/TH									2020-04-06	PPIA
ATDC5 cells - Hit with virus 1x, hit with puro									2020-04-06	Bglap2
10% FBS then switched to 5% FBS									threshold 0.04	JL
** New RT On BG group on 3/17/2020
Cntrl shRNA	Bglap2	PPIA	∆Ct	RUNX2	Bglap2	PPIA	∆Ct	∆∆Ct	Fold ∆
BG 1	29.6658	14.6096	15.0562	BG 1	29.7183	14.6343	15.084	0.124808	0.917126
BG 2	29.9028	14.5932	15.3095	BG 2	30.0749	14.559	15.5159	0.556719	0.679846
BG 3	29.5096	14.5603	14.9494	BG 3	29.8899	14.5751	15.3148	0.355632	0.781527
BG 4	29.1263	14.6047	14.5216	BG 4	28.9428	14.5639	14.3789	-0.580275	1.49513
Average	29.5511	14.5919	14.9592	Average	29.6565	14.5831	15.0734	0.114221	0.968409
Median	29.5877	14.5989	15.0028	Median	29.8041	14.5695	15.1994	0.24022	0.849327
SD	0.326092	0.0222024	0.328487	SD	0.497563	0.0347956	0.495487	0.495487	0.364355
	P value								0.182177
Blap2	0.73531
PPIA	0.682468
Ct	0.714029
Relative Fold	0.371743
Fold Incr	0.923881

[truncated: 7 more sheets: Ibsp, Mgp, Spp1, Dmp1,  Mmp9, Mmp13, Alpl]
