# Supplementary material for: Differences in pathways contributing to thyroid hormone effects on postnatal cartilage calcification versus secondary ossification center development
Source: eLife. 2022 Jan 31;11:e76730. doi: 10.7554/eLife.76730 (PMC8830887; doi:10.7554/eLife.76730)
Supplement: Figure 9—figure supplement 1—source data 2. [file elife-76730-fig9-figsupp1-data2.xlsx]

## Sheet: Sox9
Source Data for Figure 9- figure supplement 1 (SP7/OSX shRNA)
2018#25 - Control and SP7 #59 shRNA (mission) 3d treatment BG, BAA, TH & BAA/TH									2021-04-21	PPIA
ATDC5 cells - Hit with virus 1x, hit with puro									2021-04-21	Sox9
10% FBS then switched to 5% FBS									threshold 0.04	DL
Cntrl shRNA	Sox9	PPIA	∆Ct	SP7 #59	Sox9	PPIA	∆Ct	∆∆Ct	Fold ∆
BG 1	18.8494	14.5403	4.30902	BG 1	18.2502	14.6046	3.64554	-0.576275	1.49099
BG 2	18.7623	14.5782	4.1841	BG 2	18.2489	14.6057	3.64325	-0.578564	1.49336
BG 3	18.8459	14.4844	4.36147	BG 3	19.5782	14.4744	5.1038	0.881984	0.542621
BG 4	18.5695	14.5368	4.03266	BG 4	18.8843	14.495	4.38939	0.16757	0.890341
Average	18.7568	14.5349	4.22182	Average	18.7404	14.5449	4.19549	-0.0263214	1.10433
Median	18.8041	14.5386	4.24656	Median	18.5673	14.5498	4.01746	-0.204353	1.19067
SD	0.13117	0.0385193	0.146416	SD	0.633626	0.070074	0.700008	0.700008	0.46981
	P value								0.234905
Sox9	0.961336
PPIA	0.811366
Ct	0.943713
Relative Fold	0.453853
Fold Incr	1.01841

## Sheet: Runx2
Source Data for Figure 9- figure supplement 1 (SP7/OSX shRNA)
2018#25 - Control and SP7 #59 shRNA (mission) 3d treatment BG, BAA, TH & BAA/TH									2021-04-21	PPIA
ATDC5 cells - Hit with virus 1x, hit with puro									2021-04-21	Runx2
10% FBS then switched to 5% FBS									threshold 0.04	DL
Cntrl shRNA	Runx2	PPIA	∆Ct	SP7 #59	Runx2	PPIA	∆Ct	∆∆Ct	Fold ∆
BG 1	18.7146	14.5403	4.17423	BG 1	18.595	14.6046	3.99032	-0.0708377	1.05033
BG 2	19.0997	14.5782	4.52154	BG 2	18.7071	14.6057	4.10145	0.0402958	0.972456
BG 3	17.9096	14.4844	3.42518	BG 3	19.3904	14.4744	4.91599	0.854834	0.552929
BG 4	18.6605	14.5368	4.12367	BG 4	18.7562	14.495	4.26125	0.200094	0.870494
Average	18.5961	14.5349	4.06116	Average	18.8622	14.5449	4.31725	0.256096	0.861551
Median	18.6875	14.5386	4.14895	Median	18.7317	14.5498	4.18135	0.120195	0.921475
SD	0.497678	0.0385193	0.459386	SD	0.358545	0.070074	0.414358	0.414358	0.218528
	P value								0.109264
Runx2	0.418984
PPIA	0.811366
Ct	0.439398
Relative Fold	0.44951
Fold Incr	0.837351

## Sheet: Dlx3
Source Data for Figure 9- figure supplement 1 (SP7/OSX shRNA)
2018#25 - Control and SP7 #59 shRNA (mission) 3d treatment BG, BAA, TH & BAA/TH									2021-04-21	PPIA
ATDC5 cells - Hit with virus 1x, hit with puro									2021-04-27	Dlx3
10% FBS then switched to 5% FBS									threshold 0.04	DL
Cntrl shRNA	Dlx3	PPIA	∆Ct	SP7 #59	Dlx3	PPIA	∆Ct	∆∆Ct	Fold ∆
BG 1	28.6351	14.5403	14.0948	BG 1	27.3024	14.6046	12.6977	-1.16622	2.24423
BG 2	28.3041	14.5782	13.7259	BG 2	27.6755	14.6057	13.0698	-0.794136	1.73404
BG 3	28.3907	14.4844	13.9063	BG 3
BG 4	28.2657	14.5368	13.7288	BG 4	27.8338	14.495	13.3388	-0.5251	1.43903
Average	28.3989	14.5349	13.8639	Average	27.6039	14.5684	13.0355	-0.828486	1.80577
Median	28.3474	14.5386	13.8175	Median	27.6755	14.6046	13.0698	-0.794136	1.73404
SD	0.165941	0.0385193	0.175486	SD	0.272862	0.0636305	0.321938	0.321938	0.407363
	P value								0.203681
Dlx3	0.00472604
PPIA	0.42157
Ct	0.00682265
Relative Fold	0.256591
Fold Incr	1.77582

## Sheet: Dlx5
Source Data for Figure 9- figure supplement 1 (SP7/OSX shRNA)
2018#25 - Control and SP7 #59 shRNA (mission) 3d treatment BG, BAA, TH & BAA/TH									2021-04-21	PPIA
ATDC5 cells - Hit with virus 1x, hit with puro									2021-04-27	Dlx5
10% FBS then switched to 5% FBS									threshold 0.04	DL
Cntrl shRNA	Dlx5	PPIA	∆Ct	SP7 #59	Dlx5	PPIA	∆Ct	∆∆Ct	Fold ∆
BG 1	20.5535	14.5403	6.01317	BG 1	20.4552	14.6046	5.85054	0.0261786	0.982018
BG 2	20.1408	14.5782	5.5626	BG 2
BG 3	20.3722	14.4844	5.8878	BG 3	19.8998	14.4744	5.42546	-0.3989	1.3185
BG 4	20.3707	14.5368	5.83387	BG 4	20.3267	14.495	5.83174	0.00737596	0.9949
Average	20.3593	14.5349	5.82436	Average	20.2272	14.5247	5.70258	-0.121782	1.09847
Median	20.3715	14.5386	5.86083	Median	20.3267	14.495	5.83174	0.00737596	0.9949
SD	0.169088	0.0385193	0.189981	SD	0.290718	0.0700227	0.240175	0.240175	0.190659
	P value								0.0953296
Dlx5	0.478267
PPIA	0.810913
Ct	0.484864
Relative Fold	0.014017
Fold Incr	1.08808

## Sheet: Dlx6
Source Data for Figure 9- figure supplement 1 (SP7/OSX shRNA)
2018#25 - Control and SP7 #59 shRNA (mission) 3d treatment BG, BAA, TH & BAA/TH									2021-04-21	PPIA
ATDC5 cells - Hit with virus 1x, hit with puro									2021-04-27	Dlx6
10% FBS then switched to 5% FBS									threshold 0.04	DL
Cntrl shRNA	Dlx6	PPIA	∆Ct	SP7 #59	Dlx6	PPIA	∆Ct	∆∆Ct	Fold ∆
BG 1	21.631	14.5403	7.09071	BG 1	21.6605	14.6046	7.0559	-0.0106566	1.00741
BG 2	21.5751	14.5782	6.99695	BG 2	21.4405	14.6057	6.83479	-0.231762	1.17427
BG 3	21.6976	14.4844	7.21319	BG 3	21.2783	14.4744	6.80391	-0.262647	1.19968
BG 4	21.5022	14.5368	6.96537	BG 4	21.3026	14.495	6.80761	-0.258948	1.19661
Average	21.6015	14.5349	7.06656	Average	21.4205	14.5449	6.87555	-0.191003	1.14449
Median	21.6031	14.5386	7.04383	Median	21.3715	14.5498	6.8212	-0.245355	1.18544
SD	0.083002	0.0385193	0.111311	SD	0.17526	0.070074	0.121017	0.121017	0.0920839
	P value								0.0460419
Dlx6	0.11113
PPIA	0.811366
Ct	0.059181
Relative Fold	0.00489806
Fold Incr	1.14156

## Sheet: Sp7
Source Data for Figure 9- figure supplement 1 (SP7/OSX shRNA)
2018#25 - Control and SP7 #59 shRNA (mission) 3d treatment BG, BAA, TH & BAA/TH									2018-12-27	PPIA
ATDC5 cells - Hit with virus 1x, hit with puro									2018-12-27	Sp7
10% FBS then switched to 5% FBS									threshold 0.04	JL
Cntrl shRNA	Sp7	PPIA	∆Ct	SP7 #59	Sp7	PPIA	∆Ct	∆∆Ct	Fold ∆
BG 1	20.5613	14.2572	6.30408	BG 1	22.4149	14.3844	8.03052	1.75249	0.296789
BG 2	20.6026	14.2373	6.36525	BG 2	22.0237	14.3654	7.65824	1.38021	0.384162
BG 3	20.4096	14.1798	6.22984	BG 3	21.8772	14.1875	7.6897	1.41167	0.375875
BG 4	20.4899	14.2769	6.21294	BG 4	21.813	14.2018	7.61129	1.33326	0.396871
Average	20.5158	14.2378	6.27803	Average	22.0322	14.2848	7.74744	1.46941	0.363424
Median	20.5256	14.2473	6.26696	Median	21.9504	14.2836	7.67397	1.39594	0.380019
SD	0.0847376	0.0419276	0.0703434	SD	0.269927	0.104533	0.191451	0.191451	0.0452548
	P value								0.0226274
Sp7	3.89226e-05
PPIA	0.43644
Ct	7.00023e-06
Relative Fold	2.75845
Fold Incr	0.36113

## Sheet: Col1a1
Source Data for Figure 9- figure supplement 1 (SP7/OSX shRNA)
2018#25 - Control and SP7 #59 shRNA (mission) 3d treatment BG, BAA, TH & BAA/TH									2021-04-21	PPIA
ATDC5 cells - Hit with virus 1x, hit with puro									2021-04-21	Col1a1
10% FBS then switched to 5% FBS									threshold 0.04	DL
Cntrl shRNA	Col1a1	PPIA	∆Ct	SP7 #59	Col1a1	PPIA	∆Ct	∆∆Ct	Fold ∆
BG 1	28.2833	14.5403	13.743	BG 1	27.6191	14.6046	13.0145	0.32712	0.797126
BG 2				BG 2	27.5863	14.6057	12.9806	0.293197	0.816091
BG 3	26.7044	14.4844	12.22	BG 3	27.2964	14.4744	12.822	0.134621	0.910909
BG 4	26.636	14.5368	12.0991	BG 4
Average	27.2079	14.5205	12.6874	Average	27.5006	14.5616	12.939	0.251646	0.841376
Median	26.7044	14.5368	12.22	Median	27.5863	14.6046	12.9806	0.293197	0.816091
SD	0.931979	0.0313172	0.9162	SD	0.177615	0.0755084	0.102756	0.102756	0.0609597
	P value								0.0304798
Col1a1	0.621442
PPIA	0.433716
Ct	0.661022
Relative Fold	0.125601
Fold Incr	0.839938

## Sheet: Col2a1
Source Data for Figure 9- figure supplement 1 (SP7/OSX shRNA)
2018#25 - Control and SP7 #59 shRNA (mission) 3d treatment BG, BAA, TH & BAA/TH									2020-04-08	PPIA	2021-04-21
ATDC5 cells - Hit with virus 1x, hit with puro									2020-04-08	Col2a1	2021-04-21
10% FBS then switched to 5% FBS									threshold 0.04	JL	DL
** New RT on AA group done on 4/6/2020
Cntrl shRNA	Col2a1	PPIA	∆Ct	SP7 #59	Col2a1	PPIA	∆Ct	∆∆Ct	Fold ∆
BG 1	21.174	14.5403	6.63371	BG 1	20.7724	14.6046	6.16778	0.0119283	0.991766
BG 2	20.5837	14.5782	6.00552	BG 2	20.8838	14.6057	6.27806	0.122217	0.918775
BG 3	20.5819	14.4844	6.09743	BG 3	21.2052	14.4744	6.73079	0.574939	0.671315
BG 4	20.4236	14.5368	5.88674	BG 4	20.9041	14.495	6.40919	0.253338	0.838953
Average	20.6908	14.5349	6.15585	Average	20.9414	14.5449	6.39645	0.240605	0.855202
Median	20.5828	14.5386	6.05147	Median	20.8939	14.5498	6.34363	0.187777	0.878864
SD	0.330795	0.0385193	0.330043	SD	0.18515	0.070074	0.243755	0.243755	0.137562
	P value								0.0687809
Col2a1	0.234329
PPIA	0.811366
Ct	0.285314
Relative Fold	0.234605
Fold Incr	0.84639

## Sheet: Col10a1
Source Data for Figure 9- figure supplement 1 (SP7/OSX shRNA)
2018#25 - Control and SP7 #59 shRNA (mission) 3d treatment BG, BAA, TH & BAA/TH									2021-04-21	PPIA
ATDC5 cells - Hit with virus 1x, hit with puro									2021-04-27	Col10a1
10% FBS then switched to 5% FBS									threshold 0.04	DL
Cntrl shRNA	Col10a1	PPIA	∆Ct	SP7 #59	Col10a1	PPIA	∆Ct	∆∆Ct	Fold ∆
BG 1	27.2225	14.5403	12.6822	BG 1	27.8082	14.6046	13.2036	0.271644	0.828375
BG 2	27.8206	14.5782	13.2425	BG 2
BG 3	27.4346	14.4844	12.9501	BG 3	28.3761	14.4744	13.9017	0.969729	0.510602
BG 4	27.3898	14.5368	12.853	BG 4	28.4618	14.495	13.9669	1.03494	0.488037
Average	27.4669	14.5349	12.9319	Average	28.2154	14.5247	13.6907	0.75877	0.609005
Median	27.4122	14.5386	12.9015	Median	28.3761	14.495	13.9017	0.969729	0.510602
SD	0.252878	0.0385193	0.234793	SD	0.3552	0.0700227	0.423122	0.423122	0.190315
	P value								0.0951576
Col10a1	0.0217616
PPIA	0.810913
Ct	0.02777
Relative Fold	1.39687
Fold Incr	0.591

## Sheet: Bglap2
Source Data for Figure 9- figure supplement 1 (SP7/OSX shRNA)
2018#25 - Control and SP7 #59 shRNA (mission) 3d treatment BG, BAA, TH & BAA/TH									2020-04-08	PPIA	2021-04-21
ATDC5 cells - Hit with virus 1x, hit with puro									2020-04-08	Bglap2	2021-04-21
10% FBS then switched to 5% FBS									threshold 0.04	JL	DL
** New RT on AA group done on 4/6/2020
Cntrl shRNA	Bglap2	PPIA	∆Ct	SP7 #59	Bglap2	PPIA	∆Ct	∆∆Ct	Fold ∆
BG 1	29.518	14.5403	14.9777	BG 1	29.0985	14.6046	14.4938	0.0539982	0.963263
BG 2	29.4263	14.5782	14.8481	BG 2	28.0118	14.6057	13.4061	-1.0337	2.04726
BG 3	28.7942	14.4844	14.3098	BG 3	28.4501	14.4744	13.9758	-0.464067	1.37943
BG 4	28.1606	14.5368	13.6238	BG 4	28.3807	14.495	13.8857	-0.554118	1.46827
Average	28.9748	14.5349	14.4398	Average	28.4853	14.5449	13.9404	-0.499471	1.46456
Median	29.1102	14.5386	14.5789	Median	28.4154	14.5498	13.9307	-0.509093	1.42385
SD	0.63097	0.0385193	0.616118	SD	0.451786	0.070074	0.445707	0.445707	0.446506
	P value								0.223253
Bglap2	0.253942
PPIA	0.811366
Ct	0.236956
Relative Fold	0.00289054
Fold Incr	1.41369

[truncated: 7 more sheets: Ibsp, Mgp, Spp1, Dmp1, Mmp9, Mmp13, Alp]
