# Supplementary material for: Differences in pathways contributing to thyroid hormone effects on postnatal cartilage calcification versus secondary ossification center development
Source: eLife. 2022 Jan 31;11:e76730. doi: 10.7554/eLife.76730 (PMC8830887; doi:10.7554/eLife.76730)
Supplement: Figure 9—figure supplement 1—source data 3. [file elife-76730-fig9-figsupp1-data3.xlsx]

## Sheet: Sox9
Source Data for Figure 9- figure supplement 1 (DLX3 shRNA)
2021 #10 ATDC5 DLX3 #32 shRNA							PPIA	2021-04-05	GG
No serum Free, RNA extracted at 3d							Sox9	2021-04-07	GG
RNA Extractions done by DL
Nano, dilutions and RT done by DL
Used 1ug RNA for RT
Cntrl shRNA	Sox9	PPIA	∆Ct	DLX3 (#32)	Sox9	PPIA	∆Ct	∆∆Ct	Fold ∆
BG 1	17.89	14.616	3.274	BG 1	18.435	14.682	3.753	0.43575	0.739309
BG 2	17.944	14.62	3.324	BG 2	18.219	14.684	3.535	0.21775	0.859905
BG 3	17.93	14.593	3.337	BG 3	18.258	14.723	3.535	0.21775	0.859905
BG 4	17.913	14.579	3.334	BG 4	18.305	14.677	3.628	0.31075	0.806223
Average	17.9193	14.602	3.31725	Average	18.3042	14.6915	3.61275	0.2955	0.816336
Median	17.9215	14.6045	3.329	Median	18.2815	14.683	3.5815	0.26425	0.833064
SD	0.0232576	0.0194079	0.0293641	SD	0.0939907	0.0212053	0.103268	0.103268	0.057248
	P value								0.028624
Sox9	0.000210304
PPIA	0.000793109
Ct	0.00150816
Relative Fold	0.159016
Fold Incr	0.81479

## Sheet: Runx2
Source Data for Figure 9- figure supplement 1 (DLX3 shRNA)
2021 #10 ATDC5 DLX3 #32 shRNA							PPIA	2021-04-05	GG
No serum Free, RNA extracted at 3d							Runx2	2021-04-07	GG
RNA Extractions done by DL
Nano, dilutions and RT done by DL
Used 1ug RNA for RT
Cntrl shRNA	Runx2	PPIA	∆Ct	DLX3 (#32)	Runx2	PPIA	∆Ct	∆∆Ct	Fold ∆
BG 1	18.459	14.616	3.843	BG 1	18.555	14.682	3.873	-0.057	1.0403
BG 2	18.684	14.62	4.064	BG 2	18.408	14.684	3.724	-0.206	1.15349
BG 3	18.649	14.593	4.056	BG 3	18.582	14.723	3.859	-0.071	1.05044
BG 4	18.336	14.579	3.757	BG 4	18.815	14.677	4.138	0.208	0.865737
Average	18.532	14.602	3.93	Average	18.59	14.6915	3.8985	-0.0315	1.02749
Median	18.554	14.6045	3.9495	Median	18.5685	14.683	3.866	-0.064	1.04537
SD	0.163847	0.0194079	0.154197	SD	0.168363	0.0212053	0.173225	0.173225	0.119346
	P value								0.0596728
Runx2	0.639025
PPIA	0.000793109
Ct	0.794994
Relative Fold	0.0200861
Fold Incr	1.02207

## Sheet: Dlx3
Source Data for Figure 9- figure supplement 1 (DLX3 shRNA)
2021 #10 ATDC5 Dlx3 #32 shRNA							PPIA	2021-04-05	GG
No serum Free, RNA extracted at 3d							Dlx3	2021-04-06	DL
RNA Extractions done by DL
Nano, dilutions and RT done by DL
Used 1ug RNA for RT
Cntrl shRNA	Dlx3	PPIA	∆Ct	Dlx3 (#32)	Dlx3	PPIA	∆Ct	∆∆Ct	Fold ∆
BG 1	30.235	14.616	15.619	BG 1	31.497	14.682	16.815	0.895333	0.537623
BG 2				BG 2
BG 3	30.745	14.593	16.152	BG 3	31.192	14.723	16.469	0.549333	0.683336
BG 4	30.567	14.579	15.988	BG 4	31.765	14.677	17.088	1.16833	0.444935
Average	30.5157	14.596	15.9197	Average	31.4847	14.694	16.7907	0.871	0.555298
Median	30.567	14.593	15.988	Median	31.497	14.682	16.815	0.895333	0.537623
SD	0.258846	0.0186815	0.272991	SD	0.286699	0.0252389	0.310217	0.310217	0.120179
	P value								0.0600896
Dlx3	0.0122036
PPIA	0.00567083
Ct	0.0217562
Relative Fold	1.39527
Fold Incr	0.546768

## Sheet: Dlx5
Source Data for Figure 9- figure supplement 1 (DLX3 shRNA)
2021 #10 ATDC5 DLX3 #32 shRNA							PPIA	2021-04-05	GG
No serum Free, RNA extracted at 3d							Dlx5	2021-04-07	GG
RNA Extractions done by DL
Nano, dilutions and RT done by DL
Used 1ug RNA for RT
Cntrl shRNA	Dlx5	PPIA	∆Ct	DLX3 (#32)	Dlx5	PPIA	∆Ct	∆∆Ct	Fold ∆
BG 1	20.623	14.616	6.007	BG 1	20.274	14.682	5.592	-0.36925	1.29168
BG 2	20.623	14.62	6.003	BG 2	20.472	14.684	5.788	-0.17325	1.1276
BG 3	20.628	14.593	6.035	BG 3	20.316	14.723	5.593	-0.36825	1.29079
BG 4	20.379	14.579	5.8	BG 4	20.458	14.677	5.781	-0.18025	1.13308
Average	20.5633	14.602	5.96125	Average	20.38	14.6915	5.6885	-0.27275	1.21079
Median	20.623	14.6045	6.005	Median	20.387	14.683	5.687	-0.27425	1.21193
SD	0.122856	0.0194079	0.108439	SD	0.0997998	0.0212053	0.110889	0.110889	0.0929208
	P value								0.0464604
Dlx5	0.059819
PPIA	0.000793109
Ct	0.012562
Relative Fold	0.026199
Fold Incr	1.20811

## Sheet: Dlx6
Source Data for Figure 9- figure supplement 1 (DLX3 shRNA)
2021 #10 ATDC5 DLX3 #32 shRNA							PPIA	2021-04-05	GG
No serum Free, RNA extracted at 3d							Dlx6	2021-04-07	GG
RNA Extractions done by DL
Nano, dilutions and RT done by DL
Used 1ug RNA for RT
Cntrl shRNA	Dlx6	PPIA	∆Ct	DLX3 (#32)	Dlx6	PPIA	∆Ct	∆∆Ct	Fold ∆
BG 1	21.286	14.616	6.67	BG 1	21.236	14.682	6.554	-0.12575	1.09107
BG 2	21.305	14.62	6.685	BG 2	21.015	14.684	6.331	-0.34875	1.27346
BG 3	21.387	14.593	6.794	BG 3	21.432	14.723	6.709	0.02925	0.97993
BG 4	21.149	14.579	6.57	BG 4	20.909	14.677	6.232	-0.44775	1.36391
Average	21.2818	14.602	6.67975	Average	21.148	14.6915	6.4565	-0.22325	1.17709
Median	21.2955	14.6045	6.6775	Median	21.1255	14.683	6.4425	-0.23725	1.18227
SD	0.0987569	0.0194079	0.0916892	SD	0.233245	0.0212053	0.215571	0.215571	0.173647
	P value								0.0868234
Dlx6	0.33158
PPIA	0.000793109
Ct	0.10529
Relative Fold	5.89619e-05
Fold Incr	1.16736

## Sheet: Sp7
Source Data for Figure 9- figure supplement 1 (DLX3 shRNA)
2021 #10 ATDC5 DLX3 #32 shRNA							PPIA	2021-04-05	GG
No serum Free, RNA extracted at 3d							Sp7	2021-04-07	GG
RNA Extractions done by DL
Nano, dilutions and RT done by DL
Used 1ug RNA for RT
Cntrl shRNA	Sp7	PPIA	∆Ct	DLX3 (#32)	Sp7	PPIA	∆Ct	∆∆Ct	Fold ∆
BG 1	21.429	14.616	6.813	BG 1	20.829	14.682	6.147	-0.61075	1.52705
BG 2	21.349	14.62	6.729	BG 2	21.086	14.684	6.402	-0.35575	1.27965
BG 3	21.467	14.593	6.874	BG 3	20.978	14.723	6.255	-0.50275	1.41691
BG 4	21.194	14.579	6.615	BG 4	20.919	14.677	6.242	-0.51575	1.42974
Average	21.3598	14.602	6.75775	Average	20.953	14.6915	6.2615	-0.49625	1.41334
Median	21.389	14.6045	6.771	Median	20.9485	14.683	6.2485	-0.50925	1.42332
SD	0.12095	0.0194079	0.112206	SD	0.107774	0.0212053	0.105314	0.105314	0.101792
	P value								0.0508962
Sp7	0.00240028
PPIA	0.000793109
Ct	0.000658055
Relative Fold	0.152831
Fold Incr	1.41054

## Sheet: Col1a1
Source Data for Figure 9- figure supplement 1 (DLX3 shRNA)
2021 #10 ATDC5 DLX3 #32 shRNA							PPIA	2021-04-05	GG
No serum Free, RNA extracted at 3d							Col1a1	2021-04-07	DL
RNA Extractions done by DL
Nano, dilutions and RT done by DL
Used 1ug RNA for RT
Cntrl shRNA	Col1a1	PPIA	∆Ct	DLX3 (#32)	Col1a1	PPIA	∆Ct	∆∆Ct	Fold ∆
BG 1	25.456	14.616	10.84	BG 1	26.371	14.682	11.689	0.90575	0.533755
BG 2	25.299	14.62	10.679	BG 2	26.562	14.684	11.878	1.09475	0.468217
BG 3	25.39	14.593	10.797	BG 3
BG 4	25.396	14.579	10.817	BG 4	25.713	14.677	11.036	0.25275	0.839295
Average	25.3852	14.602	10.7833	Average	26.2153	14.681	11.5343	0.751083	0.613756
Median	25.393	14.6045	10.807	Median	26.371	14.682	11.689	0.90575	0.533755
SD	0.064763	0.0194079	0.0716862	SD	0.445392	0.00360555	0.441794	0.441794	0.198052
	P value								0.0990262
Col1a1	0.012648
PPIA	0.00104542
Ct	0.0181987
Relative Fold	1.42296
Fold Incr	0.594157

## Sheet: Col2a1
Source Data for Figure 9- figure supplement 1 (DLX3 shRNA)
2021 #10 ATDC5 DLX3 #32 shRNA							PPIA	2021-04-05	GG
No serum Free, RNA extracted at 3d							Col2a1	2021-04-07	DL
RNA Extractions done by DL
Nano, dilutions and RT done by DL
Used 1ug RNA for RT
Cntrl shRNA	Col2a1	PPIA	∆Ct	DLX3 (#32)	Col2a1	PPIA	∆Ct	∆∆Ct	Fold ∆
BG 1	20.143	14.616	5.527	BG 1	22.005	14.682	7.323	1.79275	0.288621
BG 2	20.259	14.62	5.639	BG 2	22.428	14.684	7.744	2.21375	0.215573
BG 3	20.204	14.593	5.611	BG 3	22.399	14.723	7.676	2.14575	0.225977
BG 4	19.923	14.579	5.344	BG 4	22.238	14.677	7.561	2.03075	0.244728
Average	20.1322	14.602	5.53025	Average	22.2675	14.6915	7.576	2.04575	0.243725
Median	20.1735	14.6045	5.569	Median	22.3185	14.683	7.6185	2.08825	0.235353
SD	0.147326	0.0194079	0.132975	SD	0.193932	0.0212053	0.184804	0.184804	0.0322707
	P value								0.0161353
Col2a1	2.20738e-06
PPIA	0.000793109
Ct	1.90935e-06
Relative Fold	4.97537
Fold Incr	0.242197

## Sheet: Col10a1
Source Data for Figure 9- figure supplement 1 (DLX3 shRNA)
2021 #10 ATDC5 DLX3 #32 shRNA							PPIA	2021-04-05	GG
No serum Free, RNA extracted at 3d							Col10a1	2021-04-29	GG
RNA Extractions done by DL
Nano, dilutions and RT done by DL
Used 1ug RNA for RT
Cntrl shRNA	Col10a1	PPIA	∆Ct	DLX3 (#32)	Col10a1	PPIA	∆Ct	∆∆Ct	Fold ∆
BG 1	27.3511	14.616	12.7351	BG 1	28.3143	14.682	13.6323	1.19441	0.436967
BG 2	26.553	14.62	11.933	BG 2	27.6672	14.684	12.9832	0.545333	0.685233
BG 3	27.1912	14.593	12.5982	BG 3	27.3692	14.723	12.6462	0.208279	0.865569
BG 4	27.0643	14.579	12.4853	BG 4	27.8786	14.677	13.2016	0.763688	0.588989
Average	27.0399	14.602	12.4379	Average	27.8073	14.6915	13.1158	0.677926	0.644189
Median	27.1278	14.6045	12.5418	Median	27.7729	14.683	13.0924	0.654511	0.637111
SD	0.34519	0.0194079	0.351786	SD	0.397368	0.0212053	0.413221	0.413221	0.17952
	P value								0.0897598
Col10a1	0.0267718
PPIA	0.000793109
Ct	0.0466276
Relative Fold	1.1906
Fold Incr	0.625063

## Sheet: Bglap2
Source Data for Figure 9- figure supplement 1 (DLX3 shRNA)
2021 #10 ATDC5 DLX3 #32 shRNA							PPIA	2021-04-05	GG
No serum Free, RNA extracted at 3d							Bglap2	2021-04-08	GG
RNA Extractions done by DL
Nano, dilutions and RT done by DL
Used 1ug RNA for RT
Cntrl shRNA	Bglap2	PPIA	∆Ct	DLX3 (#32)	Bglap2	PPIA	∆Ct	∆∆Ct	Fold ∆
BG 1	27.2739	14.616	12.6579	BG 1	26.6844	14.682	12.0024	-0.895092	1.85973
BG 2	27.322	14.62	12.702	BG 2	26.2462	14.684	11.5622	-1.3353	2.52328
BG 3	28.2597	14.593	13.6667	BG 3	26.8184	14.723	12.0954	-0.80211	1.74365
BG 4	27.1424	14.579	12.5634	BG 4	27.1668	14.677	12.4898	-0.407699	1.32657
Average	27.4995	14.602	12.8975	Average	26.7289	14.6915	12.0374	-0.86005	1.86331
Median	27.2979	14.6045	12.6799	Median	26.7514	14.683	12.0489	-0.848601	1.80169
SD	0.512448	0.0194079	0.516045	SD	0.380677	0.0212053	0.380819	0.380819	0.495978
	P value								0.247989
Bglap2	0.0522803
PPIA	0.000793109
Ct	0.0364382
Relative Fold	0.229663
Fold Incr	1.8151

[truncated: 7 more sheets: Ibsp, Mgp, Spp1, Dmp1, Mmp9, Mmp13, Alpl]
