# Supplementary material for: Differences in pathways contributing to thyroid hormone effects on postnatal cartilage calcification versus secondary ossification center development
Source: eLife. 2022 Jan 31;11:e76730. doi: 10.7554/eLife.76730 (PMC8830887; doi:10.7554/eLife.76730)
Supplement: Figure 9—figure supplement 1—source data 4. [file elife-76730-fig9-figsupp1-data4.xlsx]

## Sheet: Sox9
Source Data for Figure 9- figure supplement 1 (DLX5 shRNA)
2019#25 ATDC5 DLX5 #40 shRNA							PPIA	2020-04-08
Hit with 10MOI of virus							Sox9	2020-04-10
No serum Free, RNA extracted at 3d
RNA Extractions done by Jasmine Lau
Nano, dilutions and RT done by JL
Control shRNA	Sox9	PPIA	∆Ct	DLX5 #40	Sox9	PPIA	∆Ct	∆∆Ct	Fold Δ
BG 1	18.3877	14.4673	3.92037	BG 1	19.3948	14.48	4.91475	0.92669	0.526064
BG 2	18.4499	14.4539	3.996	BG 2	18.9286	14.4767	4.45187	0.463815	0.725066
BG 3	18.4101	14.4378	3.97229	BG 3	19.3646	14.432	4.93255	0.944486	0.519615
BG 4	18.4864	14.4229	4.06358	BG 4	18.8667	14.4441	4.42254	0.434478	0.739961
Average	18.4335	14.4455	3.98806	Average	19.1387	14.4582	4.68043	0.692367	0.627677
Median	18.43	14.4459	3.98415	Median	19.1466	14.4604	4.68331	0.695252	0.625565
SD	0.0436607	0.0193008	0.0594345	SD	0.279727	0.0238341	0.281196	0.281196	0.121237
	P value								0.0606184
Sox9	0.00249866
PPIA	0.437223
Ct	0.00294608
Relative Fold	0.947826
Fold Incr	0.618838

## Sheet: Runx2
Source Data for Figure 9- figure supplement 1 (DLX5 shRNA)
2019#25 ATDC5 DLX5 #40 shRNA							PPIA	2020-04-06	2021-04-21	GG
Hit with 10MOI of virus							Runx2	2020-04-08	2021-04-21	GG
No serum Free, RNA extracted at 3d				New RT done by GG 4/21/21
RNA Extractions done by Jasmine Lau
Nano, dilutions and RT done by JL
Control shRNA	Runx2	PPIA	∆Ct	DLX5 #40	Runx2	PPIA	∆Ct	∆∆Ct	Fold Δ
BG 1	18.496	14.4673	4.0287	BG 1	18.7219	14.48	4.24182	0.301016	0.81168
BG 2	18.3514	14.4539	3.89745	BG 2	18.4747	14.4767	3.99794	0.057138	0.961169
BG 3	18.3867	14.4378	3.94886	BG 3	18.2849	14.432	3.85287	-0.0879312	1.06284
BG 4	18.3111	14.4229	3.88821	BG 4	18.3087	14.4441	3.86454	-0.0762601	1.05428
Average	18.3863	14.4455	3.9408	Average	18.4475	14.4582	3.9893	0.0484908	0.972494
Median	18.369	14.4459	3.92316	Median	18.3917	14.4604	3.93124	-0.00956106	1.00773
SD	0.0794054	0.0193008	0.064385	SD	0.201434	0.0238341	0.180755	0.180755	0.116679
	P value								0.0583394
Runx2	0.592064
PPIA	0.437223
Ct	0.631284
Relative Fold	0.0525538
Fold Incr	0.966947

## Sheet: Dlx3
Source Data for Figure 9- figure supplement 1 (DLX5 shRNA)
2019#25 ATDC5 DLX5 #40 shRNA							PPIA	2020-04-06	PPIA	2021-04-21
Hit with 10MOI of virus							Dlx3	2020-04-06	Dlx3	2021-04-21
No serum Free, RNA extracted at 3d										GG
RNA Extractions done by Jasmine Lau
Nano, dilutions and RT done by JL
Control shRNA	Dlx3	PPIA	∆Ct	DLX5 #40	Dlx3	PPIA	∆Ct	∆∆Ct	Fold Δ
BG 1	28.678	14.4673	14.2107	BG 1	28.6364	14.48	14.1564	0.144647	0.904601
BG 2	28.5253	14.4539	14.0714	BG 2	28.295	14.4767	13.8182	-0.193491	1.14353
BG 3	28.191	14.4378	13.7531	BG 3
BG 4				BG 4	28.2932	14.4441	13.849	-0.162695	1.11938
Average	28.4647	14.453	14.0117	Average	28.4082	14.467	13.9412	-0.0705128	1.05583
Median	28.5253	14.4539	14.0714	Median	28.295	14.4767	13.849	-0.162695	1.11938
SD	0.249102	0.0147589	0.234542	SD	0.197657	0.0198553	0.186969	0.186969	0.131528
	P value								0.065764
Dlx3	0.773419
PPIA	0.383837
Ct	0.704724
Relative Fold	0.013562
Fold Incr	1.05009

## Sheet: Dlx5
Source Data for Figure 9- figure supplement 1 (DLX5 shRNA)
2019#25 ATDC5 Dlx5 #40 shRNA							PPIA	2019-07-16
Hit with 10MOI of virus							Dlx5	2019-07-16
No serum Free, RNA extracted at 3d
RNA Extractions done by Jasmine Lau
Nano, dilutions and RT done by JL
Cntrl shRNA	Dlx5	PPIA	∆Ct	Dlx5	Dlx5	PPIA	∆Ct	∆∆Ct	Fold Δ
BG 1	20.98	14.7071	6.27284	BG 1	21.9415	14.4418	7.49963	1.32313	0.399667
BG 2	21.1819	14.7216	6.46027	BG 2	22.2685	14.5487	7.71986	1.54335	0.343087
BG 3	20.4936	14.6086	5.88506	BG 3	22.5198	14.5419	7.97792	1.80141	0.286893
BG 4	20.6909	14.6031	6.08785	BG 4	22.2603	14.5217	7.73858	1.56208	0.338663
Average	20.8366	14.6601	6.1765	Average	22.2475	14.5135	7.734	1.55749	0.342077
Median	20.8354	14.6578	6.18035	Median	22.2644	14.5318	7.72922	1.55272	0.340875
SD	0.304745	0.0629828	0.246713	SD	0.236936	0.0491469	0.195486	0.195486	0.0460959
	P value								0.0230479
Dlx5	0.000334372
PPIA	0.0104683
Ct	6.14761e-05
Relative Fold	3.07294
Fold Incr	0.339741

## Sheet: Dlx6
Source Data for Figure 9- figure supplement 1 (DLX5 shRNA)
2019#25 ATDC5 DLX5 #40 shRNA							PPIA	2021-04-21	GG
Hit with 10MOI of virus							Dlx6	2021-04-21	GG
No serum Free, RNA extracted at 3d				GG did RT 4/21/21
RNA Extractions done by Jasmine Lau
Nano, dilutions and RT done by JL
Control shRNA	Dlx6	PPIA	∆Ct	DLX5 #40	Dlx6	PPIA	∆Ct	∆∆Ct	Fold Δ
BG 1	20.958	14.4673	6.49067	BG 1	21.3077	14.48	6.82762	0.475403	0.719266
BG 2	20.8311	14.4539	6.37716	BG 2	20.952	14.4767	6.47529	0.123078	0.918226
BG 3	20.708	14.4378	6.27014	BG 3	20.9996	14.432	6.5676	0.215384	0.861317
BG 4	20.6937	14.4229	6.27089	BG 4	20.7602	14.4441	6.31611	-0.0361071	1.02534
Average	20.7977	14.4455	6.35221	Average	21.0049	14.4582	6.54665	0.19444	0.881038
Median	20.7695	14.4459	6.32402	Median	20.9758	14.4604	6.52144	0.169231	0.889771
SD	0.123366	0.0193008	0.105105	SD	0.226825	0.0238341	0.214183	0.214183	0.127497
	P value								0.0637483
Dlx6	0.159632
PPIA	0.437223
Ct	0.154232
Relative Fold	0.166973
Fold Incr	0.873912

## Sheet: Sp7
Source Data for Figure 9- figure supplement 1 (DLX5 shRNA)
2019#25 ATDC5 DLX5 #40 shRNA							PPIA	2020-04-06	2021-04-21	GG
Hit with 10MOI of virus							Sp7	2020-04-06	2021-04-21	GG
No serum Free, RNA extracted at 3d				New RT done by GG 4/21/21
RNA Extractions done by Jasmine Lau
Nano, dilutions and RT done by JL
Control shRNA	Sp7	PPIA	∆Ct	DLX5 #40	Sp7	PPIA	∆Ct	∆∆Ct	Fold Δ
BG 1	21.1482	14.4673	6.68092	BG 1	21.1743	14.48	6.69422	0.0930481	0.93754
BG 2	21.1003	14.4539	6.64641	BG 2	20.8852	14.4767	6.40848	-0.192693	1.14289
BG 3	20.8342	14.4378	6.39638	BG 3	21.0937	14.432	6.66172	0.0605421	0.958904
BG 4	21.1038	14.4229	6.68097	BG 4	21.2332	14.4441	6.78911	0.187936	0.877861
Average	21.0466	14.4455	6.60117	Average	21.0966	14.4582	6.63838	0.0372083	0.9793
Median	21.1021	14.4459	6.66367	Median	21.134	14.4604	6.67797	0.0767951	0.948222
SD	0.143292	0.0193008	0.137493	SD	0.152082	0.0238341	0.162518	0.162518	0.114329
	P value								0.0571643
Sp7	0.649388
PPIA	0.437223
Ct	0.738599
Relative Fold	0.0398904
Fold Incr	0.974539

## Sheet: Col1a1
Source Data for Figure 9- figure supplement 1 (DLX5 shRNA)
2019#25 ATDC5 DLX5 #40 shRNA							PPIA	2020-04-08	2021-04-19	GG
Hit with 10MOI of virus							Col1a1	2020-04-10	2021-05-03	GG
No serum Free, RNA extracted at 3d
RNA Extractions done by Jasmine Lau
Nano, dilutions and RT done by JL
Control shRNA	Col1a1	PPIA	∆Ct	DLX5 #40	Col1a1	PPIA	∆Ct	∆∆Ct	Fold Δ
BG 1	25.0049	14.4673	10.5376	BG 1	26.7882	14.48	12.3081	1.06122	0.479228
BG 2	25.7998	14.4539	11.3458	BG 2	27.0024	14.4767	12.5257	1.27875	0.412152
BG 3	26.1147	14.4378	11.6768	BG 3	27.0353	14.432	12.6033	1.35636	0.390567
BG 4	25.8502	14.4229	11.4273	BG 4	26.748	14.4441	12.3038	1.05693	0.480654
Average	25.6924	14.4455	11.2469	Average	26.8935	14.4582	12.4352	1.18831	0.44065
Median	25.825	14.4459	11.3866	Median	26.8953	14.4604	12.4169	1.16998	0.44569
SD	0.478659	0.0193008	0.493376	SD	0.146337	0.0238341	0.152571	0.152571	0.0462206
	P value								0.0231103
Col1a1	0.00300313
PPIA	0.437223
Ct	0.00368408
Relative Fold	1.79797
Fold Incr	0.438815

## Sheet: Col2a1
Source Data for Figure 9- figure supplement 1 (DLX5 shRNA)
2019#25 ATDC5 DLX5 #40 shRNA							PPIA	2020-04-06	2021-04-19	GG
Hit with 10MOI of virus							Col2a1	2020-04-06	2021-05-03	GG
No serum Free, RNA extracted at 3d
RNA Extractions done by Jasmine Lau
Nano, dilutions and RT done by JL
Control shRNA	Col2a1	PPIA	∆Ct	DLX5 #40	Col2a1	PPIA	∆Ct	∆∆Ct	Fold Δ
BG 1	19.9983	14.4673	5.53097	BG 1	20.4726	14.48	5.99252	0.389945	0.763159
BG 2	20.2386	14.4539	5.78473	BG 2	20.2389	14.4767	5.76215	0.159576	0.895288
BG 3	19.9322	14.4378	5.49436	BG 3	20.402	14.432	5.96996	0.367392	0.775183
BG 4	20.0231	14.4229	5.60023	BG 4	20.2873	14.4441	5.8432	0.240623	0.846379
Average	20.048	14.4455	5.60257	Average	20.3502	14.4582	5.89196	0.289384	0.820002
Median	20.0107	14.4459	5.5656	Median	20.3447	14.4604	5.90658	0.304008	0.810781
SD	0.132727	0.0193008	0.129132	SD	0.106454	0.0238341	0.108667	0.108667	0.0621923
	P value								0.0310962
Col2a1	0.0120485
PPIA	0.437223
Ct	0.0139829
Relative Fold	0.158444
Fold Incr	0.818251

## Sheet: Col10a1
Source Data for Figure 9- figure supplement 1 (DLX5 shRNA)
2019#25 ATDC5 DLX5 #40 shRNA							PPIA	2019-07-16
Hit with 10MOI of virus							Col10a1	2019-07-19
No serum Free, RNA extracted at 3d
RNA Extractions done by Jasmine Lau
Nano, dilutions and RT done by JL
GFP	Col10a1	PPIA	∆Ct	DLX5 #40	Col10a1	PPIA	∆Ct	∆∆Ct	Fold Δ
BG 1	26.8604	14.7071	12.1533	BG 1	26.646	14.4418	12.2041	-0.305581	1.23592
BG 2	27.2941	14.7216	12.5725	BG 2	26.7504	14.5487	12.2017	-0.308026	1.23801
BG 3	27.2277	14.6086	12.6192	BG 3	27.1576	14.5419	12.6157	0.105955	0.92919
BG 4	27.297	14.6031	12.694	BG 4	27.3268	14.5217	12.805	0.295316	0.814894
Average	27.1698	14.6601	12.5097	Average	26.9702	14.5135	12.4566	-0.0530839	1.0545
Median	27.2609	14.6578	12.5958	Median	26.954	14.5318	12.4099	-0.099813	1.08255
SD	0.208741	0.0629828	0.242842	SD	0.324401	0.0491469	0.302999	0.302999	0.215795
	P value								0.107897
Col10a1	0.340557
PPIA	0.0104683
Ct	0.793703
Relative Fold	0.0624578
Fold Incr	1.03748

## Sheet: Bglap2
Source Data for Figure 9- figure supplement 1 (DLX5 shRNA)
2019#25 ATDC5 DLX5 #40 shRNA							PPIA	2020-04-06	2021-04-19	GG
Hit with 10MOI of virus							Bglap2	2020-04-06	2021-05-03	GG
No serum Free, RNA extracted at 3d
RNA Extractions done by Jasmine Lau
Nano, dilutions and RT done by JL
Control shRNA	Bglap2	PPIA	∆Ct	DLX5 #40	Bglap2	PPIA	∆Ct	∆∆Ct	Fold Δ
BG 1	22.9935	14.4673	8.52621	BG 1	25.6044	14.48	11.1243	2.20631	0.216689
BG 2	23.6087	14.4539	9.15481	BG 2	25.1783	14.4767	10.7015	1.78351	0.290476
BG 3	23.2624	14.4378	8.82457	BG 3	25.4096	14.432	10.9776	2.05955	0.239891
BG 4	23.5894	14.4229	9.1665	BG 4	25.6911	14.4441	11.247	2.32894	0.199031
Average	23.3635	14.4455	8.91802	Average	25.4708	14.4582	11.0126	2.09457	0.236522
Median	23.4259	14.4459	8.98969	Median	25.507	14.4604	11.0509	2.13293	0.22829
SD	0.2934	0.0193008	0.305535	SD	0.227801	0.0238341	0.234803	0.234803	0.039671
	P value								0.0198355
Bglap2	2.80663e-05
PPIA	0.437223
Ct	3.59008e-05
Relative Fold	5.426
Fold Incr	0.234137

[truncated: 7 more sheets: Ibsp, Mgp, Spp1, Dmp1, Mmp9, Mmp13, Alp]
