# Supplementary material for: Differences in pathways contributing to thyroid hormone effects on postnatal cartilage calcification versus secondary ossification center development
Source: eLife. 2022 Jan 31;11:e76730. doi: 10.7554/eLife.76730 (PMC8830887; doi:10.7554/eLife.76730)
Supplement: Figure 9—figure supplement 2—source data 1. [file elife-76730-fig9-figsupp2-data1.xlsx]

## Sheet: Osx
Source Data for Figure 9- figure supplement 2 (SP7- OE and shRNA)
LV#2 ATDC5 cells - GFP, Sp7 OE lentivirus									2014-07-29	PPIA
									2014-07-29	TR-B1 & Sp7 (SC)
									SP
									threshold 0.04
GFP	Sp7(SC)	PPIA	∆Ct	LV-Sp7	Sp7(SC)	PPIA	∆Ct	∆∆Ct
BSA 1				BSA 1	15.5687	14.4064	1.16226	-5.55096	46.882
BSA 2	21.4366	14.6016	6.83502	BSA 2	15.6302	14.4635	1.16667	-5.54656	46.7391
BSA 3	21.2548	14.5021	6.75275	BSA 3	15.7511	14.5534	1.19766	-5.51556	45.7457
BSA 4	21.2596	14.7077	6.5519	BSA 4	15.5895	14.3683	1.22128	-5.49195	45.003
Average	21.317	14.6038	6.71323	Average	15.6349	14.4479	1.18697	-5.52626	46.0925
Median	21.2596	14.6016	6.75275	Median	15.6099	14.435	1.18216	-5.53106	46.2424
SD	0.103604	0.102848	0.145638	SD	0.0815918	0.0805148	0.027772	0.027772	0.884817
	P value								0.442408
Sp7(SC)	5.19936e-09
PPIA	0.0729151
Ct	7.23324e-09
Relative Fold	30.2334
Fold Incr	46.0861
Sp7 shRNA #1 - ATDC5 cells Control shRNA, Sp7 shRNA: +/-TH SP cells								2012-11-08
Grown in 5% FBS DMEM/F12								SP
Puromycin Selected								threshold 0.04
								Primers(0.25ul each)
Cntrl shRNA	Sp7	PPIA	∆Ct	Sp7 shRNA	Sp7	PPIA	∆Ct	∆∆Ct
BSA 1	21.4189	15.3508	6.06812	BSA 1	21.5893	14.9884	6.60081	0.839643	0.558782
BSA 2	20.8766	15.2479	5.62868	BSA 2	21.622	15.4381	6.18395	0.422783	0.745984
BSA 3	20.8823	15.3638	5.51852	BSA 3	21.747	15.2102	6.53684	0.775677	0.584115
BSA 4	21.1836	15.3543	5.82935	BSA 4	21.6357	15.2139	6.42177	0.660603	0.632614
Average	21.0904	15.3292	5.76117	Average	21.6485	15.2127	6.43584	0.674676	0.630374
Median	21.033	15.3525	5.72901	Median	21.6289	15.2121	6.47931	0.71814	0.608364
SD	0.261808	0.0544493	0.241731	SD	0.0685212	0.183563	0.183543	0.183543	0.082938
	P value								0.041469
Sp7	0.00618351
PPIA	0.269147
Ct/ttest	0.00434893
Relative Fold	0.73654
Fold Incr	0.626473

## Sheet: Car2
Source Data for Figure 9- figure supplement 2 (SP7- OE and shRNA)
LV#2 ATDC5 cells - GFP, Sp7 OE lentivirus									2014-07-29	PPIA
									2014-07-29	TR-B1 & Sp7 (SC)
									SP
									threshold 0.04
GFP	Car2	PPIA	∆Ct	LV-Sp7	Car2	PPIA	∆Ct	∆∆Ct
BSA 1	29.3768	15.0052	14.3716	BSA 1	26.6271	14.3155	12.3115	-1.59166	3.01395
BSA 2	28.2792	14.6016	13.6776	BSA 2
BSA 3				BSA 3	26.5052	14.4851	12.0201	-1.88304	3.68852
BSA 4	28.368	14.7077	13.6603	BSA 4	26.1964	14.2735	11.923	-1.98022	3.94553
Average	28.6747	14.7715	13.9032	Average	26.4429	14.358	12.0849	-1.81831	3.54934
Median	28.368	14.7077	13.6776	Median	26.5052	14.3155	12.0201	-1.88304	3.68852
SD	0.609694	0.209233	0.405777	SD	0.221988	0.112036	0.20221	0.20221	0.481136
	P value								0.240568
Col 10	0.00398487
PPIA	0.0392644
Ct	0.00225585
Relative Fold	2.61177
Fold Incr	3.52667
Sp7 shRNA #1 - ATDC5 cells Control shRNA, Sp7 shRNA: +/-TH SP cells								11/24/14 PPIA & Car2d
Grown in 5% FBS DMEM/F12								SP
Puromycin Selected								threshold 0.04
								Primers(0.25ul each)
Cntrl shRNA	Car2d	PPIA	∆Ct	Sp7 shRNA	Car2d	PPIA	∆Ct	∆∆Ct
BSA 1	29.9699	14.9468	15.0231	BSA 1	31.8513	15.101	16.7503	1.41189	0.375818
BSA 2	30.8962	14.9909	15.9054	BSA 2	31.1231	14.9956	16.1275	0.789113	0.5787
BSA 3	30.2088	15.1222	15.0866	BSA 3
BSA 4				BSA 4	32.3781	15.1698	17.2083	1.86997	0.273578
Average	30.3583	15.0199	15.3384	Average	31.7842	15.0888	16.6954	1.35699	0.409365
Median	30.2088	14.9909	15.0866	Median	31.8513	15.101	16.7503	1.41189	0.375818
SD	0.480917	0.0912107	0.492076	SD	0.630226	0.0877505	0.542517	0.542517	0.155302
	P value								0.0776511
Car2d	0.0356898
PPIA	0.399379
Ct/ttest	0.0326203
Relative Fold	3.60814
Fold Incr	0.390395

## Sheet: Acp5
Source Data for Figure 9- figure supplement 2 (SP7- OE and shRNA)
2020 #7 -GFP or Sp7 Overexpressing ATDC5 chondrocytes									2020-05-29	PPIA	JL
									2022-01-20	Acp5	DL
									threshold 0.04
GFP	Acp5	PPIA	∆Ct	Lv-Sp7	Acp5	PPIA	∆Ct	∆∆Ct
BG 1	24.2113	14.5288	9.68254	BG 1	23.6639	14.7267	8.93722	-0.583557	1.49854
BG 2	23.8506	14.5993	9.25133	BG 2	23.6747	14.6481	9.02664	-0.494137	1.40848
BG 3	23.8762	14.5806	9.29553	BG 3	24.3094	14.778	9.53137	0.010602	0.992678
BG 4	24.4781	14.6244	9.85369	BG 4	24.3367	14.714	9.62276	0.101992	0.931746
Average	24.1041	14.5833	9.52077	Average	23.9962	14.7167	9.2795	-0.241275	1.20786
Median	24.0438	14.59	9.48904	Median	23.9921	14.7203	9.27901	-0.241767	1.20058
SD	0.298667	0.040519	0.294583	SD	0.377632	0.0534671	0.347549	0.347549	0.287103
	P value								0.143551
Acp5	0.669816
PPIA	0.00730686
Ct	0.330292
Relative Fold	0.0112941	0.346713
Fold Incr	1.18204
2018#25 - Control and SP7 #59 shRNA (mission) 3d treatment BG, BAA, TH & BAA/TH									2021-04-21	PPIA
ATDC5 cells - Hit with virus 1x, hit with puro									2021-04-27	Acp5
10% FBS then switched to 5% FBS									threshold 0.04	DL
Cntrl shRNA	Acp5	PPIA	∆Ct	SP7 #59	Acp5	PPIA	∆Ct	∆∆Ct
BG 1	21.4461	14.5403	6.9058	BG 1	21.8987	14.6046	7.29411	0.250046	0.84087
BG 2	21.5341	14.5782	6.95593	BG 2	21.7386	14.6057	7.13295	0.0888822	0.940251
BG 3	21.4211	14.4844	6.93666	BG 3	21.7767	14.4744	7.30232	0.258258	0.836097
BG 4	21.9147	14.5368	7.37787	BG 4	22.3297	14.495	7.83476	0.790693	0.578066
Average	21.579	14.5349	7.04407	Average	21.9359	14.5449	7.39104	0.34697	0.798821
Median	21.4901	14.5386	6.94629	Median	21.8377	14.5498	7.29822	0.254152	0.838483
SD	0.228993	0.0385193	0.223494	SD	0.271247	0.070074	0.305921	0.305921	0.154804
	P value								0.0774019
Acp5	0.091024
PPIA	0.811366
Ct	0.116723
Relative Fold	0.426267
Fold Incr	0.786234
