# Supplementary material for: Differences in pathways contributing to thyroid hormone effects on postnatal cartilage calcification versus secondary ossification center development
Source: eLife. 2022 Jan 31;11:e76730. doi: 10.7554/eLife.76730 (PMC8830887; doi:10.7554/eLife.76730)
Supplement: Figure 9—figure supplement 3—source data 1. [file elife-76730-fig9-figsupp3-data1.xlsx]

## Sheet: FH Sp7
Source Data for Figure 9- figure supplement 3 (FH vs DF CCs Response to TH)
2019 #35 femur head hit Sp7Lox Homo knockdown							PPIA	2019-06-24
Mice were collected at 7d							Sp7	2019-06-24
24 hours with ad-GFP and ad-iCre
No serum Free, RNA extracted at 22d
GFP	Sp7	PPIA	∆Ct	GFP	Sp7	PPIA	∆Ct	∆∆Ct
BG 1	24.5316	15.4381	9.0935	TH 1
BG 2	24.5367	15.3476	9.18902	TH 2	23.8016	15.4346	8.36701	-0.445535	1.36182
BG 3	23.7588	15.6233	8.13549	TH 3	24.7408	15.4148	9.32596	0.513417	0.700561
BG 4	24.3417	15.5095	8.83216	TH 4	24.3228	15.485	8.83778	0.0252411	0.982656
Average	24.2922	14.847	8.81254	Average	24.2884	15.4448	8.84358	0.0310411	1.01501
Median	24.4367	14.8312	8.96283	Median	24.3228	15.4346	8.83778	0.0252411	0.982656
SD	0.366979	0.0710592	0.475905	SD	0.470559	0.0362061	0.479503	0.479503	0.331815
	P value								0.165907
Sp7	0.990795
PPIA	0.644692
Ct	0.935453
Relative Fold	0.260655
Fold Incr	0.978714

## Sheet: FH Dlx3
Source Data for Figure 9- figure supplement 3 (FH vs DF CCs Response to TH)
2019 #35 femur head hit Sp7Lox Homo knockdown							PPIA	2020-05-07
Mice were collected at 7d							Dlx3	2020-05-07
24 hours with ad-GFP and ad-iCre							TH and AA/TH group	Ran on 5/6/2020
No serum Free, RNA extracted at 22d
Nano, dilutions and RT done by JL
GFP	Dlx3	PPIA	∆Ct	GFP	Dlx3	PPIA	∆Ct	∆∆Ct
BG 1	25.1121	15.5673	9.54485	TH 1	22.9713	15.6993	7.27199	-2.32927	5.02552
BG 2	25.3103	15.4784	9.83196	TH 2	23.4638	15.5629	7.9009	-1.70036	3.24983
BG 3	24.8749	15.5399	9.33496	TH 3	23.0322	15.6429	7.38933	-2.21194	4.63298
BG 4	25.1938	15.5005	9.69329	TH 4	23.8122	15.601	8.2112	-1.39007	2.62091
Average	25.1228	14.847	9.60127	Average	23.3199	15.6265	7.69335	-1.90791	3.88231
Median	25.1529	14.8312	9.61907	Median	23.248	15.622	7.64511	-1.95615	3.94141
SD	0.184203	0.0710592	0.212754	SD	0.394696	0.0585146	0.440157	0.440157	1.13455
	P value								0.567273
Dlx3	0.000168203
PPIA	0.0249759
Ct	0.000233222
Relative Fold	2.1543
Fold Incr	3.75265

## Sheet: DF Sp7
Source Data for Figure 9- figure supplement 3 (FH vs DF CCs Response to TH)
2019 #1 SOC GFP and iCre GFP knockdown check									2019-06-27	PPIA
Mice were collected at 7d									2019-06-27	Sp7
Sp7Lox Homo SOC cells - Hit with virus 1x									threshold 0.04	JL
NO AA alpha MEM 10% FBS
RNA extracted at 22d
No Serum Free
GFP	Sp7	PPIA	∆Ct	GFP	Sp7	PPIA	∆Ct	∆∆Ct
BG 1	26.7203	14.9749	11.7454	TH 1	24.2262	14.9157	9.31055	-1.38967	2.6202
BG 2	26.1042	15.2231	10.8811
BG 3	25.3653	14.9569	10.4084	TH 3	25.1933	14.8982	10.2951	-0.405159	1.32424
BG 4	25.7543	14.9432	10.8111	TH 4	24.6406	14.8748	9.7658	-0.93442	1.91112
Average	25.986	15.0245	10.7002	Average	24.6867	14.8962	9.79047	-0.909751	1.95185
Median	25.9293	14.9659	10.8111	Median	24.6406	14.8982	9.7658	-0.93442	1.91112
SD	0.575031	0.133025	0.255111	SD	0.485193	0.0204831	0.492721	0.492721	0.64894
	P value								0.32447
Sp7	0.0255161
PPIA	0.166738
Ct	0.0468703
Relative Fold	0.173914
Fold Incr	1.87872

## Sheet: DF Dlx3
Source Data for Figure 9- figure supplement 3 (FH vs DF CCs Response to TH)
2019 #1 SOC GFP and iCre GFP knockdown check									2019-06-27	PPIA
Mice were collected at 7d									2019-06-27	Sp7
Sp7Lox Homo SOC cells - Hit with virus 1x									threshold 0.04	JL
NO AA alpha MEM 10% FBS
RNA extracted at 22d
GFP	Dlx3	PPIA	∆Ct	GFP	Dlx3	PPIA	∆Ct	∆∆Ct
BG 1	24.8538	15.4381	9.41571	TH 1	26.9708	15.4205	11.5504	3.0787	0.118364
BG 2	23.678	15.4968	8.18117	TH 2	27.5342	15.4346	12.0996	3.62793	0.0808879
BG 3	23.726	15.2558	8.4702	TH 3	26.9856	15.4148	11.5707	3.09903	0.116708
BG 4	24.1584	15.3948	8.76368	TH 4	26.7321	15.485	11.247	2.77534	0.146063
Average	24.1041	15.3964	8.47168	Average	27.0557	15.4387	11.6169	3.14525	0.115506
Median	23.9422	15.4164	8.4702	Median	26.9782	15.4275	11.5605	3.08886	0.117536
SD	0.544545	0.102601	0.291259	SD	0.339514	0.0319738	0.354206	0.354206	0.0267193
	P value								0.0133597
Dlx3	9.30432e-05
PPIA	0.460641
Ct	5.90158e-05
Relative Fold	12.2462
Fold Incr	0.113028
