# Supplementary material for: Differences in pathways contributing to thyroid hormone effects on postnatal cartilage calcification versus secondary ossification center development
Source: eLife. 2022 Jan 31;11:e76730. doi: 10.7554/eLife.76730 (PMC8830887; doi:10.7554/eLife.76730)
Supplement: Figure 9—source data 1. — Reverse transcriptase quantitative polymerase chain reaction (RT-qPCR) data for control shRNA. Average fold changes plotted and t-test values are highlighted in yellow. [file elife-76730-fig9-data1.xlsx]

## Sheet: Sox9
Source Data for Figure 9A
2021 #10 ATDC5 Sox9 #32 shRNA							PPIA	2021-04-05	GG
No serum Free, RNA extracted at 3d							Sox9	2021-04-07	GG
RNA Extractions done by DL
Nano, dilutions and RT done by DL
Used 1ug RNA for RT
Cntrl shRNA	Sox9	PPIA	∆Ct	Cntrl shRNA	Sox9	PPIA	∆Ct	∆∆Ct
BG 1	17.89	14.616	3.274	TH 1	18.813	14.699	4.114	0.79675	0.575644
BG 2	17.944	14.62	3.324	TH 2	18.575	14.598	3.977	0.65975	0.632988
BG 3	17.93	14.593	3.337	TH 3	18.58	14.689	3.891	0.57375	0.671868
BG 4	17.913	14.579	3.334	TH 4	18.694	14.661	4.033	0.71575	0.608889
Average	17.9193	14.602	3.31725	Average	18.6655	14.6618	4.00375	0.6865	0.622347
Median	17.9215	14.6045	3.329	Median	18.637	14.675	4.005	0.68775	0.620938
SD	0.0232576	0.0194079	0.0293641	SD	0.112648	0.0454414	0.0938771	0.0938771	0.0405291
	P value								0.0202646
Sox9	1.29008e-05
PPIA	0.0519746
Ct	8.42687e-06					PPIA	Sox9
Relative Fold	0.608988				Blank	29.587	Undetermined
Fold Incr	0.621359				Blank	28.644	Undetermined			`
2019#25 ATDC5 DLX5 #40 shRNA
Hit with 10MOI of virus
No serum Free, RNA extracted at 3d
RNA Extractions done by Jasmine Lau
Nano, dilutions and RT done by JL
Control shRNA	SOX9	PPIA	∆Ct	Control shRNA	SOX9	PPIA	∆Ct	∆∆Ct
BG 1	18.3877	14.4673	3.92037	AA 1	18.8792	14.5768	4.30237	0.314312	0.804235
BG 2	18.4499	14.4539	3.996	AA2	18.9382	14.5859	4.35233	0.364275	0.776859
BG 3	18.4101	14.4378	3.97229	AA 3	18.7958	14.5907	4.2051	0.217041	0.860328
BG 4	18.4864	14.4229	4.06358	AA 4	19.0066	14.6144	4.39212	0.404064	0.755727
Average	18.4335	14.4455	3.98806	Average	18.9049	14.592	4.31298	0.324923	0.799287
Median	18.43	14.4459	3.98415	Median	18.9087	14.5883	4.32735	0.339293	0.790547
SD	0.0436607	0.0193008	0.0594345	SD	0.0894479	0.0160471	0.0807523	0.0807523	0.0452805
	P value								0.0226403
SOX9	7.88317e-05
PPIA	2.38322e-05						PPIA	SOX9
Ct	0.000641083					Blank	31.3147	Undetermined
Relative Fold	0.164572					Blank	39.6644	Undetermined
Fold Incr	0.798341
Control shRNA	SOX9	PPIA	∆Ct	Control shRNA	SOX9	PPIA	∆Ct	∆∆Ct
BG 1	18.5402	14.4673	4.07291	AA/TH 1	20.1236	14.5659	5.55773	1.47943	0.358629
BG 2	18.6495	14.4539	4.19561	AA/TH 2	19.4396	14.6862	4.75339	0.67509	0.626293
BG 3	18.4639	14.4378	4.02611	AA/TH 3	19.8994	14.6211	5.27831	1.20001	0.435271
BG 4	18.4414	14.4229	4.01855	AA/TH 4	19.4431	14.642	4.80111	0.722815	0.605914
Average	18.5238	14.4455	4.0783	Average	19.7264	14.6288	5.09764	1.01934	0.506527
Median	18.5021	14.4459	4.04951	Median	19.6713	14.6315	5.03971	0.961414	0.520593
SD	0.0938904	0.0193008	0.0818231	SD	0.341682	0.0499357	0.387628	0.387628	0.130605
	P value								0.0653025
SOX9	0.000500137
PPIA	0.000476792
Ct	0.0021236
Relative Fold	1.97955
Fold Incr	0.493343
									(AA vs AA/TH)
									P value
									0.00546507

## Sheet: Runx2
Source Data for Figure 9A
2021 #10 ATDC5 Runx2 #32 shRNA							PPIA	2021-04-05	GG
No serum Free, RNA extracted at 3d							Runx2	2021-04-07	GG
RNA Extractions done by DL
Nano, dilutions and RT done by DL
Used 1ug RNA for RT
Cntrl shRNA	Runx2	PPIA	∆Ct	Cntrl shRNA	Runx2	PPIA	∆Ct	∆∆Ct
BG 1	18.459	14.616	3.843	TH 1	19.264	14.699	4.565	0.635	0.643941
BG 2	18.684	14.62	4.064	TH 2	18.69	14.598	4.092	0.162	0.893785
BG 3	18.649	14.593	4.056	TH 3	18.671	14.689	3.982	0.052	0.964598
BG 4	18.336	14.579	3.757	TH 4	18.691	14.661	4.03	0.1	0.933033
Average	18.532	14.602	3.93	Average	18.829	14.6618	4.16725	0.23725	0.858839
Median	18.554	14.6045	3.9495	Median	18.6905	14.675	4.061	0.131	0.913409
SD	0.163847	0.0194079	0.154197	SD	0.290146	0.0454414	0.268963	0.268963	0.146165
	P value								0.0730823
Runx2	0.124918
PPIA	0.0519746
Ct	0.176768					PPIA	Runx2
Relative Fold	0.256251				Blank	29.587	28.247
Fold Incr	0.848361				Blank	28.644	28.377			`
2019#25 ATDC5 DLX5 #40 shRNA
Hit with 10MOI of virus
No serum Free, RNA extracted at 3d
RNA Extractions done by Jasmine Lau
Nano, dilutions and RT done by JL
Control shRNA	RUNX2	PPIA	∆Ct	Control shRNA	RUNX2	PPIA	∆Ct	∆∆Ct
BG 1	18.496	14.4673	4.0287	AA 1	17.9563	14.4794	3.47689	-0.463919	1.37928
BG 2	18.3514	14.4539	3.89745	AA2	17.8857	14.4698	3.41588	-0.524929	1.43886
BG 3	18.3867	14.4378	3.94886	AA 3	17.9113	14.4847	3.42653	-0.51427	1.42827
BG 4	18.3111	14.4229	3.88821	AA 4	17.8773	14.5958	3.28146	-0.65935	1.57937
Average	18.3863	14.4455	3.9408	Average	17.9076	14.5075	3.40019	-0.540617	1.45645
Median	18.369	14.4459	3.92316	Median	17.8985	14.4821	3.42121	-0.519599	1.43357
SD	0.0794054	0.0193008	0.064385	SD	0.0355207	0.0592437	0.0835072	0.0835072	0.0859603
	P value								0.0429802
RUNX2	3.34727e-05
PPIA	0.0937834						PPIA	RUNX2
Ct	5.01946e-05					Blank	31.3147	25.2071
Relative Fold	0.208949					Blank	39.6644	27.6698
Fold Incr	1.45459
Control shRNA	RUNX2	PPIA	∆Ct	Control shRNA	RUNX2	PPIA	∆Ct	∆∆Ct
BG 1	18.496	14.4673	4.0287	AA/TH 1	17.9159	14.5161	3.39976	-0.541044	1.45502
BG 2	18.3514	14.4539	3.89745	AA/TH 2	17.9955	14.6436	3.35193	-0.588877	1.50408
BG 3	18.3867	14.4378	3.94886	AA/TH 3	17.8813	14.4525	3.4288	-0.512006	1.42603
BG 4	18.3111	14.4229	3.88821	AA/TH 4	17.5908	14.404	3.18678	-0.754025	1.68649
Average	18.3863	14.4455	3.9408	Average	17.8459	14.504	3.34182	-0.598988	1.51791
Median	18.369	14.4459	3.92316	Median	17.8986	14.4843	3.37584	-0.56496	1.47955
SD	0.0794054	0.0193008	0.064385	SD	0.176665	0.103753	0.108108	0.108108	0.116915
	P value								0.0584574
RUNX2	0.00140619
PPIA	0.309515
Ct	7.65876e-05
Relative Fold	0.240963
Fold Incr	1.51465
									(AA vs AA/TH)
									P value
									0.429458

## Sheet: Dlx3
Source Data for Figure 9A
2021 #10 ATDC5 DLX3 #32 shRNA							PPIA	2021-04-05	GG
No serum Free, RNA extracted at 3d							DLX3	2021-04-06	DL
RNA Extractions done by DL
Nano, dilutions and RT done by DL
Used 1ug RNA for RT
Used 10uL cDNA
Cntrl shRNA	DLX3	PPIA	∆Ct	Cntrl shRNA	DLX3	PPIA	∆Ct	∆∆Ct
BG 1	27.5222	14.616	12.9062	TH 1	27.3732	14.699	12.6742	-0.114946	1.08293
BG 2	27.2102	14.62	12.5902	TH 2	27.4547	14.598	12.8567	0.0675591	0.954251			New values from Real time 11/4/21
BG 3	27.5332	14.593	12.9402	TH 3	27.1956	14.689	12.5066	-0.282529	1.21633
BG 4	27.299	14.579	12.72	TH 4	27.166	14.661	12.505	-0.284183	1.21772
Average	27.3912	14.602	12.7892	Average	27.2974	14.6618	12.6356	-0.153525	1.11781
Median	27.4106	14.6045	12.8131	Median	27.2844	14.675	12.5904	-0.198738	1.14963
SD	0.161852	0.0194079	0.164193	SD	0.139195	0.0454414	0.167412	0.167412	0.126036
	P value								0.063018
DLX3	0.413437
PPIA	0.0519746
Ct	0.238294					PPIA	DLX3
Relative Fold	0.00019285				Blank	29.587	Undetermined
Fold Incr	1.11228				Blank	28.644	Undetermined			`
2019#25 ATDC5 DLX5 #40 shRNA
Hit with 10MOI of virus
No serum Free, RNA extracted at 3d
RNA Extractions done by Jasmine Lau
Nano, dilutions and RT done by JL
Control shRNA	DLX3	PPIA	∆Ct	Control shRNA	DLX3	PPIA	∆Ct	∆∆Ct
BG 1	28.678	14.4673	14.2107	AA 1	27.022	14.4794	12.5426	-1.28161	2.4311
BG 2	28.5253	14.4539	14.0714	AA2	27.3592	14.4698	12.8894	-0.934747	1.91156
BG 3	28.191	14.4378	13.7531	AA 3	27.2646	14.4847	12.7798	-1.04435	2.06244
BG 4	27.6844	14.4229	13.2615	AA 4
Average	28.2696	14.4455	13.8242	Average	27.2153	14.478	12.7373	-1.0869	2.13503
Median	28.3581	14.4459	13.9122	Median	27.2646	14.4794	12.7798	-1.04435	2.06244
SD	0.440022	0.0193008	0.421173	SD	0.173946	0.00756858	0.177304	0.177304	0.267272
	P value								0.133636
DLX3	0.0119463
PPIA	0.0421549						PPIA	DLX3
Ct	0.00912738					Blank	31.3147	29.9647
Relative Fold	0.827372					Blank	39.6644	30.8846
Fold Incr	2.12418
Control shRNA	DLX3	PPIA	∆Ct	Control shRNA	DLX3	PPIA	∆Ct	∆∆Ct
BG 1	30.2059	14.4673	15.7386	AA/TH 1	33.0219	14.5161	18.5058	2.27531	0.206569
BG 2	30.7609	14.4539	16.307	AA/TH 2	30.9645	14.6436	16.3209	0.090415	0.939253
BG 3	31.1733	14.4378	16.7355	AA/TH 3	33.2324	14.4525	18.7799	2.54941	0.170825
BG 4	30.5637	14.4229	16.1409	AA/TH 4	34.5796	14.404	20.1757	3.94518	0.0649208
Average	30.676	14.4455	16.2305	Average	32.9496	14.504	18.4456	2.21508	0.345392
Median	30.6623	14.4459	16.2239	Median	33.1271	14.4843	18.6428	2.41236	0.188697
SD	0.40335	0.0193008	0.412638	SD	1.49252	0.103753	1.59403	1.59403	0.40045
	P value								0.200225
DLX3	0.025907
PPIA	0.309515
Ct	0.0360275
Relative Fold	14.5093
Fold Incr	0.215375
									(AA vs AA/TH)
									P value
									0.0011732

## Sheet: Dlx5
Source Data for Figure 9A
2021 #10 ATDC5 DLX5 #32 shRNA							PPIA	2021-04-05	GG
No serum Free, RNA extracted at 3d							DLX5	2021-04-07	GG
RNA Extractions done by DL
Nano, dilutions and RT done by DL
Used 1ug RNA for RT
Cntrl shRNA	DLX5	PPIA	∆Ct	Cntrl shRNA	DLX5	PPIA	∆Ct	∆∆Ct
BG 1	20.623	14.616	6.007	TH 1	20.909	14.699	6.21	0.24875	0.841625
BG 2	20.623	14.62	6.003	TH 2	20.608	14.598	6.01	0.04875	0.966774
BG 3	20.628	14.593	6.035	TH 3	20.494	14.689	5.805	-0.15625	1.11439
BG 4	20.379	14.579	5.8	TH 4	20.57	14.661	5.909	-0.05225	1.03688
Average	20.5633	14.602	5.96125	Average	20.6452	14.6618	5.9835	0.02225	0.989917
Median	20.623	14.6045	6.005	Median	20.589	14.675	5.9595	-0.00175	1.00183
SD	0.122856	0.0194079	0.108439	SD	0.182109	0.0454414	0.172643	0.172643	0.115793
	P value								0.0578967
DLX5	0.483546
PPIA	0.0519746
Ct	0.834452					PPIA	DLX5
Relative Fold	0.0379834				Blank	29.587	Undetermined
Fold Incr	0.984696				Blank	28.644	Undetermined			`
2019#25 ATDC5 DLX5 #40 shRNA
Hit with 10MOI of virus
No serum Free, RNA extracted at 3d
RNA Extractions done by Jasmine Lau
Nano, dilutions and RT done by JL
Cntrl shRNA	DLX5	PPIA	∆Ct	Cntrl shRNA	DLX5	PPIA	∆Ct	∆∆Ct
BG 1	20.98	14.7071	6.27284	AA 1	20.47	14.6193	5.85073	-0.325771	1.25333
BG 2	21.1819	14.7216	6.46027	AA2	20.6361	14.6408	5.99534	-0.181166	1.1338
BG 3	20.4936	14.6086	5.88506	AA 3	20.425	14.6128	5.81222	-0.364287	1.28725
BG 4	20.6909	14.6031	6.08785	AA 4	20.6546	14.6083	6.04635	-0.13015	1.09441
Average	20.8366	14.6601	6.1765	Average	20.5464	14.6203	5.92616	-0.250344	1.1922
Median	20.8354	14.6578	6.18035	Median	20.5531	14.616	5.92303	-0.253469	1.19357
SD	0.304745	0.0629828	0.246713	SD	0.115952	0.0144079	0.112405	0.112405	0.0926374
	P value								0.0463187
DLX5	0.12543
PPIA	0.264049						PPIA	DLX5
Ct	0.114298					Blank	36.2825	Undetermined
Relative Fold	0.019027					Blank	Undetermined	Undetermined
Fold Incr	1.18949
Cntrl shRNA	DLX5	PPIA	∆Ct	Cntrl shRNA	DLX5	PPIA	∆Ct	∆∆Ct
BG 1	20.98	14.7071	6.27284	AA/TH 1	19.8484	14.5863	5.26218	-0.91432	1.88468
BG 2	21.1819	14.7216	6.46027	AA/TH 2	20.3054	14.6833	5.62209	-0.554409	1.46857
BG 3	20.4936	14.6086	5.88506	AA/TH 3	19.9138	14.5146	5.39926	-0.777241	1.71385
BG 4	20.6909	14.6031	6.08785	AA/TH 4	20.2316	14.5759	5.65572	-0.520787	1.43474
Average	20.8366	14.6601	6.1765	Average	20.0748	14.59	5.48481	-0.691689	1.62546
Median	20.8354	14.6578	6.18035	Median	20.0727	14.5811	5.51068	-0.665825	1.59121
SD	0.304745	0.0629828	0.246713	SD	0.22725	0.0697801	0.187027	0.187027	0.212915
	P value								0.106458
DLX5	0.00705657
PPIA	0.186563
Ct	0.00424462
Relative Fold	0.254684
Fold Incr	1.61517
									(AA vs AA/TH)
									P value
									0.00971506

## Sheet: Dlx6
Source Data for Figure 9A
2021 #10 ATDC5 DLX6 #32 shRNA							PPIA	2021-04-05	GG
No serum Free, RNA extracted at 3d							DLX6	2021-04-07	GG
RNA Extractions done by DL
Nano, dilutions and RT done by DL
Used 1ug RNA for RT
Cntrl shRNA	DLX6	PPIA	∆Ct	Cntrl shRNA	DLX6	PPIA	∆Ct	∆∆Ct
BG 1	21.286	14.616	6.67	TH 1	21.513	14.699	6.814	0.13425	0.911143
BG 2	21.305	14.62	6.685	TH 2	21.181	14.598	6.583	-0.09675	1.06936
BG 3	21.387	14.593	6.794	TH 3	21.406	14.689	6.717	0.03725	0.974511
BG 4	21.149	14.579	6.57	TH 4	21.33	14.661	6.669	-0.01075	1.00748
Average	21.2818	14.602	6.67975	Average	21.3575	14.6618	6.69575	0.016	0.990624
Median	21.2955	14.6045	6.6775	Median	21.368	14.675	6.693	0.01325	0.990995
SD	0.0987569	0.0194079	0.0916892	SD	0.139572	0.0454414	0.0963721	0.0963721	0.0659812
	P value								0.0329906
DLX6	0.409678
PPIA	0.0519746
Ct	0.817902					PPIA	DLX6
Relative Fold	0.0126275				Blank	29.587	Undetermined
Fold Incr	0.988971				Blank	28.644	Undetermined			`
2019#25 ATDC5 DLX5 #40 shRNA
Hit with 10MOI of virus
No serum Free, RNA extracted at 3d
RNA Extractions done by Jasmine Lau
Nano, dilutions and RT done by JL
Control shRNA	DLX6	PPIA	∆Ct	Control shRNA	DLX6	PPIA	∆Ct	∆∆Ct
BG 1	20.958	14.4673	6.49067	AA 1	20.2148	14.4794	5.73535	-0.616866	1.53354
BG 2	20.8311	14.4539	6.37716	AA2	20.1172	14.4698	5.64739	-0.704819	1.62994
BG 3	20.708	14.4378	6.27014	AA 3	19.7324	14.4847	5.2477	-1.10451	2.15026
BG 4	20.6937	14.4229	6.27089	AA 4	19.8228	14.5958	5.22696	-1.12526	2.1814
Average	20.7977	14.4455	6.35221	Average	19.9718	14.5075	5.46435	-0.887863	1.87379
Median	20.7695	14.4459	6.32402	Median	19.97	14.4821	5.44755	-0.904665	1.8901
SD	0.123366	0.0193008	0.105105	SD	0.230704	0.0592437	0.264724	0.264724	0.339752
	P value								0.169876
DLX6	0.000737023
PPIA	0.0937834						PPIA	DLX6
Ct	0.000788089					Blank	31.3147	Undetermined
Relative Fold	0.388302					Blank	39.6644	Undetermined
Fold Incr	1.85043
Control shRNA	DLX6	PPIA	∆Ct	Control shRNA	DLX6	PPIA	∆Ct	∆∆Ct
BG 1	20.958	14.4673	6.49067	AA/TH 1	19.7446	14.5161	5.22848	-1.12373	2.1791
BG 2	20.8311	14.4539	6.37716	AA/TH 2	19.8198	14.6436	5.17618	-1.17604	2.25955
BG 3	20.708	14.4378	6.27014	AA/TH 3	19.7616	14.4525	5.30915	-1.04306	2.06059
BG 4	20.6937	14.4229	6.27089	AA/TH 4	19.6308	14.404	5.22679	-1.12542	2.18165
Average	20.7977	14.4455	6.35221	Average	19.7392	14.504	5.23515	-1.11706	2.17022
Median	20.7695	14.4459	6.32402	Median	19.7531	14.4843	5.22764	-1.12458	2.18038
SD	0.123366	0.0193008	0.105105	SD	0.0791173	0.103753	0.054981	0.054981	0.0820728
	P value								0.0410364
DLX6	6.89747e-06
PPIA	0.309515
Ct	1.44681e-06
Relative Fold	1.12802
Fold Incr	2.16905
									(AA vs AA/TH)
									P value
									0.140769

## Sheet: Sp7
Source Data for Figure 9A
2021 #10 ATDC5 SP7/OSX #32 shRNA							PPIA	2021-04-05	GG
No serum Free, RNA extracted at 3d							SP7	2021-04-07	GG
RNA Extractions done by DL
Nano, dilutions and RT done by DL
Used 1ug RNA for RT
Cntrl shRNA	SP7	PPIA	∆Ct	Cntrl shRNA	OSX	PPIA	∆Ct	∆∆Ct
BG 1	21.429	14.616	6.813	TH 1	21.436	14.699	6.737	-0.02075	1.01449
BG 2	21.349	14.62	6.729	TH 2	21.517	14.598	6.919	0.16125	0.89425
BG 3	21.467	14.593	6.874	TH 3	21.637	14.689	6.948	0.19025	0.876454
BG 4	21.194	14.579	6.615	TH 4	21.505	14.661	6.844	0.08625	0.941968
Average	21.3598	14.602	6.75775	Average	21.5237	14.6618	6.862	0.10425	0.93179
Median	21.389	14.6045	6.771	Median	21.511	14.675	6.8815	0.12375	0.918109
SD	0.12095	0.0194079	0.112206	SD	0.083512	0.0454414	0.0941524	0.0941524	0.0616811
	P value								0.0308406
SP7	0.0671186
PPIA	0.0519746
Ct	0.204462					PPIA	OSX
Relative Fold	0.0393635				Blank	29.587	Undetermined
Fold Incr	0.930288				Blank	28.644	Undetermined			`
2019#25 ATDC5 DLX5 #40 shRNA
Hit with 10MOI of virus
No serum Free, RNA extracted at 3d
RNA Extractions done by Jasmine Lau
Nano, dilutions and RT done by JL
Control shRNA	SP7	PPIA	∆Ct	Control shRNA	SP7	PPIA	∆Ct	∆∆Ct
BG 1	21.1482	14.4673	6.68092	AA 1	19.8601	14.4794	5.38065	-1.22052	2.33031
BG 2	21.1003	14.4539	6.64641	AA2	20.2574	14.4698	5.78755	-0.813623	1.75762
BG 3	20.8342	14.4378	6.39638	AA 3	20.2819	14.4847	5.79713	-0.804043	1.74599
BG 4	21.1038	14.4229	6.68097	AA 4	20.5448	14.5958	5.94895	-0.652225	1.57159
Average	21.0466	14.4455	6.60117	Average	20.236	14.5075	5.72857	-0.872604	1.85138
Median	21.1021	14.4459	6.66367	Median	20.2696	14.4821	5.79234	-0.808833	1.7518
SD	0.143292	0.0193008	0.137493	SD	0.282388	0.0592437	0.243444	0.243444	0.330434
	P value								0.165217
SP7	0.0021787
PPIA	0.0937834						PPIA	SP7
Ct	0.00078299					Blank	31.3147	Undetermined
Relative Fold	0.395842					Blank	39.6644	Undetermined
Fold Incr	1.83096
Control shRNA	SP7	PPIA	∆Ct	Control shRNA	SP7	PPIA	∆Ct	∆∆Ct
BG 1	21.1482	14.4673	6.68092	AA/TH 1	19.872	14.5161	5.35587	-1.2453	2.37069
BG 2	21.1003	14.4539	6.64641	AA/TH 2	19.8094	14.6436	5.16577	-1.4354	2.70458
BG 3	20.8342	14.4378	6.39638	AA/TH 3	20.144	14.4525	5.69153	-0.909641	1.87858
BG 4	21.1038	14.4229	6.68097	AA/TH 4
Average	21.0466	14.4455	6.60117	Average	19.9418	14.5374	5.40439	-1.19678	2.31795
Median	21.1021	14.4459	6.66367	Median	19.872	14.5161	5.35587	-1.2453	2.37069
SD	0.143292	0.0193008	0.137493	SD	0.177892	0.097327	0.266218	0.266218	0.415517
	P value								0.207759
SP7	0.000260884
PPIA	0.115867
Ct	0.00053375
Relative Fold	0.865951
Fold Incr	2.29228
									(AA vs AA/TH)
									P value
									0.156746

## Sheet: Col1a1
Source Data for Figure 9A
2021 #10 ATDC5 Col1a1 #32 shRNA							PPIA	2021-04-05	GG
No serum Free, RNA extracted at 3d							Col1a1	2021-04-07	DL
RNA Extractions done by DL
Nano, dilutions and RT done by DL
Used 1ug RNA for RT
Cntrl shRNA	Col1a1	PPIA	∆Ct	Cntrl shRNA	Col1a1	PPIA	∆Ct	∆∆Ct
BG 1	25.456	14.616	10.84	TH 1	24.713	14.699	10.014	-0.76925	1.70438
BG 2	25.299	14.62	10.679	TH 2	24.727	14.598	10.129	-0.65425	1.5738
BG 3	25.39	14.593	10.797	TH 3	24.721	14.689	10.032	-0.75125	1.68325
BG 4	25.396	14.579	10.817	TH 4	24.989	14.661	10.328	-0.45525	1.37102
Average	25.3852	14.602	10.7833	Average	24.7875	14.6618	10.1258	-0.6575	1.58311
Median	25.393	14.6045	10.807	Median	24.724	14.675	10.0805	-0.70275	1.62852
SD	0.064763	0.0194079	0.0716862	SD	0.134456	0.0454414	0.143982	0.143982	0.152539
	P value								0.0762693
Col1a1	0.000201977
PPIA	0.0519746
Ct	0.000180314						PPIA	Col1a1
Relative Fold	0.2637					Blank	29.587	39.012
Fold Incr	1.57735					Blank	28.644	39.307		`
Control shRNA	Col1a1	PPIA	∆Ct	Control shRNA	Col1a1	PPIA	∆Ct	∆∆Ct
BG 1	26.7619	15.3376	11.4243	AA 1	26.22	15.4062	10.8138	-0.290136	1.22276
BG 2	26.2949	15.1473	11.1476	AA2	25.7499	15.4128	10.3371	-0.766829	1.70153
BG 3	26.1812	14.983	11.1981	AA 3	25.9738	15.1824	10.7913	-0.312583	1.24193
BG 4	26.3953	15.7498	10.6455	AA 4	25.9267	15.7032	10.2235	-0.880401	1.84089
Average	26.4083	15.3044	11.1039	Average	25.9676	15.4262	10.5414	-0.562487	1.50177
Median	26.3451	15.2424	11.1729	Median	25.9502	15.4095	10.5642	-0.539706	1.47173
SD	0.251422	0.330382	0.328431	SD	0.193924	0.213463	0.305206	0.305206	0.31637
	P value								0.158185
Col1a1	0.0321561
PPIA	0.558703						PPIA	Col1a1
Ct	0.0459564					Blank	Undetermined	35.8023
Relative Fold	0.0661936					Blank	37.4405	35.7372
Fold Incr	1.47681
Control shRNA	Col1a1	PPIA	∆Ct	Control shRNA	Col1a1	PPIA	∆Ct	∆∆Ct
BG 1	26.7619	15.3376	11.4243	AA/TH 1	26.8066	15.7035	11.1031	-0.000778913	1.00054
BG 2	26.2949	15.1473	11.1476	AA/TH 2	25.8936	15.9865	9.90707	-1.19684	2.29237
BG 3	26.1812	14.983	11.1981	AA/TH 3
BG 4	26.3953	15.7498	10.6455	AA/TH 4	25.78	15.4727	10.3073	-0.796608	1.73701
Average	26.4083	15.3044	11.1039	Average	26.1601	15.7209	10.4392	-0.664742	1.67664
Median	26.3451	15.2424	11.1729	Median	25.8936	15.7035	10.3073	-0.796608	1.73701
SD	0.251422	0.330382	0.328431	SD	0.562791	0.257356	0.608837	0.608837	0.648028
	P value								0.324014
Col1a1	0.459435
PPIA	0.132094
Ct	0.117984
Relative Fold	0.00312545
Fold Incr	1.58529
									(AA vs AA/TH)
									P value
									0.651849

## Sheet: Col2a1
Source Data for Figure 9A
2021 #10 ATDC5 Col2a1 #32 shRNA							PPIA	2021-04-05	GG
No serum Free, RNA extracted at 3d							Col2	2021-04-07	DL
RNA Extractions done by DL
Nano, dilutions and RT done by DL
Used 1ug RNA for RT
Cntrl shRNA	Col2a1	PPIA	∆Ct	Cntrl shRNA	Col2a1	PPIA	∆Ct	∆∆Ct
BG 1	20.143	14.616	5.527	TH 1	20.997	14.699	6.298	0.76775	0.587333
BG 2	20.259	14.62	5.639	TH 2	21.176	14.598	6.578	1.04775	0.483722
BG 3	20.204	14.593	5.611	TH 3	21.25	14.689	6.561	1.03075	0.489456
BG 4	19.923	14.579	5.344	TH 4	21.281	14.661	6.62	1.08975	0.469843
Average	20.1322	14.602	5.53025	Average	21.176	14.6618	6.51425	0.984	0.507588
Median	20.1735	14.6045	5.569	Median	21.213	14.675	6.5695	1.03925	0.486589
SD	0.147326	0.0194079	0.132975	SD	0.127203	0.0454414	0.146284	0.146284	0.0537968
	P value								0.0268984
Col2a1	3.88115e-05
PPIA	0.0519746
Ct	5.94284e-05					PPIA	Col2a1
Relative Fold	1.27754				Blank	29.587	Undetermined
Fold Incr	0.505576				Blank	28.644	Undetermined			`
2019#25 ATDC5 DLX5 #40 shRNA
Hit with 10MOI of virus
No serum Free, RNA extracted at 3d
RNA Extractions done by Jasmine Lau
Nano, dilutions and RT done by JL
Control shRNA	Col2a1	PPIA	∆Ct	Control shRNA	Col2a1	PPIA	∆Ct	∆∆Ct
BG 1	19.9983	14.4673	5.53097	AA 1	18.7048	14.4794	4.22536	-1.37721	2.59766
BG 2	20.2386	14.4539	5.78473	AA2	18.9862	14.4698	4.5164	-1.08617	2.1231
BG 3	19.9322	14.4378	5.49436	AA 3	19.1988	14.4847	4.71406	-0.888509	1.85126
BG 4	20.0231	14.4229	5.60023	AA 4	19.1347	14.5958	4.53885	-1.06373	2.09032
Average	20.048	14.4455	5.60257	Average	19.0061	14.5075	4.49867	-1.10391	2.16559
Median	20.0107	14.4459	5.5656	Median	19.0604	14.4821	4.52762	-1.07495	2.10671
SD	0.132727	0.0193008	0.129132	SD	0.219738	0.0592437	0.202501	0.202501	0.312492
	P value								0.156246
Col2a1	0.000187642
PPIA	0.0937834						PPIA	Col2a1
Ct	9.3408e-05					Blank	25.8813	Undetermined
Relative Fold	0.812529					Blank	25.765	38.1183
Fold Incr	2.14936
Control shRNA	Col2a1	PPIA	∆Ct	Control shRNA	Col2a1	PPIA	∆Ct	∆∆Ct
BG 1	19.9983	14.4673	5.53097	AA/TH 1	18.6976	14.5161	4.18142	-1.42115	2.67799
BG 2	20.2386	14.4539	5.78473	AA/TH 2	18.9431	14.6436	4.29949	-1.30308	2.46755
BG 3	19.9322	14.4378	5.49436	AA/TH 3	18.6616	14.4525	4.20909	-1.39348	2.62711
BG 4	20.0231	14.4229	5.60023	AA/TH 4	18.5475	14.404	4.14357	-1.45901	2.74919
Average	20.048	14.4455	5.60257	Average	18.7124	14.504	4.20839	-1.39418	2.63046
Median	20.0107	14.4459	5.5656	Median	18.6796	14.4843	4.19526	-1.40731	2.65255
SD	0.132727	0.0193008	0.129132	SD	0.166533	0.103753	0.0664079	0.0664079	0.119593
	P value								0.0597967
Col2a1	1.57069e-05
PPIA	0.309515
Ct	1.29044e-06
Relative Fold	1.76297
Fold Incr	2.62839
									(AA vs AA/TH)
									P value
									0.0320509

## Sheet: Col10a1
Source Data for Figure 9A
2021 #10 ATDC5 Col10a1a10 #32 shRNA							PPIA	2021-04-05	GG
No serum Free, RNA extracted at 3d							Col10a1	2021-04-29	GG
RNA Extractions done by DL
Nano, dilutions and RT done by DL
Used 1ug RNA for RT
Cntrl shRNA	Col10a1	PPIA	∆Ct	Cntrl shRNA	Col10a1	PPIA	∆Ct	∆∆Ct
BG 1	27.3511	14.616	12.7351	TH 1	27.1319	14.699	12.4329	-0.173267	1.12761
BG 2				TH 2	26.7652	14.598	12.1672	-0.439009	1.35567
BG 3	27.1912	14.593	12.5982	TH 3
BG 4	27.0643	14.579	12.4853	TH 4	26.6196	14.661	11.9586	-0.64764	1.5666
Average	27.2022	14.596	12.6062	Average	26.8389	14.6527	12.1862	-0.419972	1.34996
Median	27.1912	14.593	12.5982	Median	26.7652	14.661	12.1672	-0.439009	1.35567
SD	0.143731	0.0186815	0.125107	SD	0.264018	0.0510131	0.237759	0.237759	0.219553
	P value								0.109776
Col10a1	0.104439
PPIA	0.145108					PPIA	Col10a1
Ct	0.0536755				Blank	29.587	Undetermined
Relative Fold	0.0332017				Blank	28.644	Undetermined
Fold Incr	1.3379
2019#25 ATDC5 DLX5 #40 shRNA
Hit with 10MOI of virus
No serum Free, RNA extracted at 3d
RNA Extractions done by Jasmine Lau
Nano, dilutions and RT done by JL
Control shRNA	Col10a1	PPIA	∆Ct	Control shRNA	Col10a1	PPIA	∆Ct	∆∆Ct
BG 1	26.8604	14.7071	12.1533	AA 1	26.4131	14.6193	11.7939	-0.715873	1.64248
BG 2	27.2941	14.7216	12.5725	AA2	26.6061	14.6408	11.9653	-0.544473	1.45849
BG 3	27.2277	14.6086	12.6192	AA 3	26.8287	14.6128	12.2159	-0.293814	1.22588
BG 4	27.297	14.6031	12.694	AA 4	25.9768	14.6083	11.3686	-1.14117	2.2056
Average	27.1698	14.6601	12.5097	Average	26.4562	14.6203	11.8359	-0.673833	1.63311
Median	27.2609	14.6578	12.5958	Median	26.5096	14.616	11.8796	-0.630173	1.55048
SD	0.208741	0.0629828	0.242842	SD	0.361884	0.0144079	0.356521	0.356521	0.417997
	P value								0.208999
Col10a1	0.0142069
PPIA	0.264049						PPIA	Col1a10
Ct	0.0204762					Blank	36.2825	30.717
Relative Fold	0.100687					Blank	Undetermined	30.6727
Fold Incr	1.59531
Control shRNA	Col10a1	PPIA	∆Ct	Control shRNA	Col10a1	PPIA	∆Ct	∆∆Ct
BG 1	26.8604	14.7071	12.1533	AA/TH 1	25.3303	14.5863	10.744	-1.76572	3.40045
BG 2	27.2941	14.7216	12.5725	AA/TH 2	25.3345	14.6833	10.6512	-1.85848	3.62626
BG 3	27.2277	14.6086	12.6192	AA/TH 3	25.7231	14.5146	11.2086	-1.30117	2.46429
BG 4	27.297	14.6031	12.694	AA/TH 4	24.7393	14.5759	10.1634	-2.34635	5.08536
Average	27.1698	14.6601	12.5097	Average	25.2818	14.59	10.6918	-1.81793	3.64409
Median	27.2609	14.6578	12.5958	Median	25.3324	14.5811	10.6976	-1.8121	3.51335
SD	0.208741	0.0629828	0.242842	SD	0.405871	0.0697801	0.428422	0.428422	1.08457
	P value								0.542285
Col10a1	0.000168772
PPIA	0.186563
Ct	0.000316726
Relative Fold	1.93074
Fold Incr	3.52576
									(AA vs AA/TH)
									P value
									0.0134631

## Sheet: Bglap2
Source Data for Figure 9A
2021 #10 ATDC5 Bglap2 #32 shRNA							PPIA	2021-04-05	GG
No serum Free, RNA extracted at 3d							Bglap2	2021-04-08	GG
RNA Extractions done by DL
Nano, dilutions and RT done by DL
Used 1ug RNA for RT
Cntrl shRNA	Bglap2	PPIA	∆Ct	Cntrl shRNA	Bglap2	PPIA	∆Ct	∆∆Ct
BG 1	27.2739	14.616	12.6579	TH 1	23.8504	14.699	9.15142	-3.74607	13.4177
BG 2	27.322	14.62	12.702	TH 2	23.8514	14.598	9.25339	-3.64409	12.502
BG 3	28.2597	14.593	13.6667	TH 3	23.8151	14.689	9.12605	-3.77143	13.6557
BG 4	27.1424	14.579	12.5634	TH 4	23.7153	14.661	9.05435	-3.84314	14.3516
Average	27.4995	14.602	12.8975	Average	23.8081	14.6618	9.1463	-3.75118	13.4818
Median	27.2979	14.6045	12.6799	Median	23.8327	14.675	9.13873	-3.75875	13.5367
SD	0.512448	0.0194079	0.516045	SD	0.0640742	0.0454414	0.0823817	0.0823817	0.763934
	P value								0.381967
Bglap2	7.32934e-06
PPIA	0.0519746
Ct	7.14995e-06					PPIA	Bglap2
Relative Fold	13.4601				Blank	29.587	32.2237
Fold Incr	13.4654				Blank	28.644	33.306			`
2019#25 ATDC5 DLX5 #40 shRNA
Hit with 10MOI of virus
No serum Free, RNA extracted at 3d
RNA Extractions done by Jasmine Lau
Nano, dilutions and RT done by JL
Cntrl shRNA	Bglap2	PPIA	∆Ct	Cntrl shRNA	Bglap2	PPIA	∆Ct	∆∆Ct
BG 1	29.518	14.5403	14.9777	AA 1	29.8956	14.7795	15.1161	0.676235	0.625796
BG 2	29.4263	14.5782	14.8481	AA 2	28.8941	14.7666	14.1274	-0.312407	1.24178
BG 3	28.7942	14.4844	14.3098	AA 3
BG 4	28.1606	14.5368	13.6238	AA 4	28.4812	14.7297	13.7515	-0.688337	1.61143
Average	28.9748	14.5349	14.4398	Average	29.0903	14.7586	14.3317	-0.10817	1.15967
Median	29.1102	14.5386	14.5789	Median	28.8941	14.7666	14.1274	-0.312407	1.24178
SD	0.63097	0.0385193	0.616118	SD	0.727346	0.0258847	0.70484	0.70484	0.497919
	P value								0.248959
Bglap2	0.830652
PPIA	0.000349669							PPIA	Bglap2
Ct	0.836882						Blank	33.7346	33.9853
Relative Fold	0.356015						Blank	Undetermined	31.5028
Fold Incr	1.07786
Control shRNA	Bglap2	PPIA	∆Ct	Control shRNA	Bglap2	PPIA	∆Ct	∆∆Ct
BG 1				AA/TH 1	26.9036	14.5161	12.3874	-0.814528	1.75872
BG 2	27.5146	14.4539	13.0607	AA/TH 2	26.4959	14.6436	11.8524	-1.3496	2.54841
BG 3	27.4567	14.4378	13.0189	AA/TH 3	26.5022	14.4525	12.0497	-1.15224	2.22259
BG 4	27.9491	14.4229	13.5262	AA/TH 4	26.8413	14.404	12.4373	-0.764635	1.69894
Average	27.6401	14.4382	13.2019	Average	26.6857	14.504	12.1817	-1.02025	2.05717
Median	27.5146	14.4378	13.0607	Median	26.6717	14.4843	12.2186	-0.983386	1.99066
SD	0.269102	0.0155267	0.281601	SD	0.217073	0.103753	0.279017	0.279017	0.402524
	P value								0.201262
Bglap2	0.00340108
PPIA	0.335663
Ct	0.00501534
Relative Fold	0.549427
Fold Incr	2.02827
									(AA vs AA/TH)
									P value
									0.0453346

[truncated: 7 more sheets: Ibsp, Mgp, Spp1, Dmp1, Mmp9, Mmp13, Alpl]
