# Supplementary material for: Differences in pathways contributing to thyroid hormone effects on postnatal cartilage calcification versus secondary ossification center development
Source: eLife. 2022 Jan 31;11:e76730. doi: 10.7554/eLife.76730 (PMC8830887; doi:10.7554/eLife.76730)
Supplement: Figure 9—source data 2. — Reverse transcriptase quantitative polymerase chain reaction (RT-qPCR) data for RUNX2 shRNA. Average fold changes plotted and t-test values are highlighted in yellow. [file elife-76730-fig9-data2.xlsx]

## Sheet: Sox9
Source Data for Figure 9C_ Runx2 shRNA with TH, AA, or AA/TH
2018#23 - Control and Runx2 #90 shRNA (mission) 3d treatment BG, BAA, TH & BAA/TH									2021-04-19	PPIA
ATDC5 cells - Hit with virus 1x, hit with puro									2021-04-23	Sox9
10% FBS then switched to 5% FBS									threshold 0.04
RT done by GG
Cntrl shRNA	Sox9	PPIA	∆Ct	Runx2 #90	Sox9	PPIA	∆Ct	∆∆Ct	Fold ∆
TH 1	18.607	14.585	4.02202	TH 1	19.3655	14.5484	4.81706	0.714547	0.609396
TH 2	18.7275	14.5564	4.1711	TH 2	19.5464	14.5369	5.00951	0.906996	0.533294
TH 3	18.7316	14.6409	4.09072	TH 3	19.4669	14.5773	4.8896	0.787089	0.579512
TH 4	18.6922	14.566	4.1262	TH 4	19.5187	14.5609	4.95778	0.855266	0.552763
Average	18.6896	14.5871	4.10251	Average	19.4744	14.5559	4.91849	0.815975	0.568742
Median	18.7098	14.5755	4.10846	Median	19.4928	14.5547	4.92369	0.821178	0.566138
SD	0.0578273	0.0378233	0.0629395	SD	0.0797468	0.0172953	0.0835679	0.0835679	0.0330689
	P value								0.0165344
Sox9	3.87934e-06
PPIA	0.184382
Ct	4.3947e-06
Relative Fold	0.809177
Fold Incr	0.568025
2018#19 - Control and RUNX2#90 shRNA (mission) 3d treatment BAA & BAA/TH
Cntrl shRNA	SOX9	PPIA	∆Ct	RUNX2 #90	SOX9	PPIA	∆Ct	∆∆Ct	Fold ∆
BAA/TH 1	18.8144	14.7353	4.07912	BAA/TH 1	18.958	14.6532	4.30479	0.131433	0.912924
BAA/TH 2	19.563	14.9227	4.64036	BAA/TH 2	18.7691	14.7429	4.02618	-0.147179	1.1074
BAA/TH 3	18.6653	14.8647	3.80059	BAA/TH 3	18.6571	14.6089	4.04819	-0.12517	1.09064
Average	19.0142	14.8409	4.17336	Average	18.7947	14.6683	4.12639	-0.046972	1.03699
Median	18.8144	14.8647	4.07912	Median	18.7691	14.6532	4.04819	-0.12517	1.09064
SD	0.481098	0.0959483	0.427743	SD	0.15209	0.0682885	0.154895	0.154895	0.107769
	P value								0.0538843
SOX9	0.493082
PPIA	0.0641585
Ct	0.866758
Relative Fold	0.0116473
Fold Incr	1.03309
Cntrl shRNA	SOX9	PPIA	∆Ct	RUNX2 #90	SOX9	PPIA	∆Ct	∆∆Ct	Fold ∆
BAA 1	18.915	15.0055	3.9095	BAA 1	18.3293	14.5907	3.73859	-0.294273	1.22627
BAA 2	18.6115	14.82	3.79152	BAA 2	18.4619	14.6444	3.8175	-0.215367	1.161
BAA 3	19.2144	14.8168	4.39757	BAA 3	18.0026	14.5649	3.43766	-0.595202	1.51068
Average	18.9136	14.8808	4.03287	Average	18.2646	14.6	3.66459	-0.36828	1.29932
Median	18.915	14.82	3.9095	Median	18.3293	14.5907	3.73859	-0.294273	1.22627
SD	0.301403	0.108009	0.321308	SD	0.23643	0.0405868	0.200441	0.200441	0.185936
	P value								0.0929679
SOX9	0.042621
PPIA	0.0135401
Ct	0.167391
Relative Fold	0.0281701
Fold Incr	1.29081

## Sheet: Runx2
Source Data for Figure 9C_ Runx2 shRNA with TH, AA, or AA/TH
2018#23 - Control and Runx2 #90 shRNA (mission) 3d treatment BG, BAA, TH & BAA/TH									2018-12-20	PPIA
ATDC5 cells - Hit with virus 1x, hit with puro									2018-12-20	Runx2
10% FBS then switched to 5% FBS									threshold 0.04	JL
Cntrl shRNA	Runx2	PPIA	∆Ct	Runx2 #90	Runx2	PPIA	∆Ct	∆∆Ct	Fold ∆
TH 1	17.8088	14.3144	3.49444	TH 1	18.6277	14.3665	4.26114	0.788608	0.578903
TH 2	18.0172	14.3329	3.68438	TH 2	18.3962	14.2681	4.12812	0.655586	0.634817
TH 3	17.6244	14.3527	3.27172	TH 3	18.5549	14.3399	4.21498	0.742451	0.597723
TH 4	17.7279	14.2883	3.43958	TH 4	18.4707	14.2591	4.21155	0.739017	0.599148
Average	17.7899	14.3246	3.47253	Average	18.4739	14.289	4.18488	0.712351	0.602648
Median	17.7279	14.3329	3.43958	Median	18.4707	14.2681	4.21155	0.739017	0.599148
SD	0.203602	0.0329785	0.207523	SD	0.0794298	0.0443095	0.0491898	0.0491898	0.0210173
	P value								0.0105086
Runx2	0.00561163
PPIA	0.326968
Ct	0.00017996
Relative Fold	0.579945
Fold Incr	0.610325
Cntrl shRNA	Runx2	PPIA	∆Ct	Runx2 #90	Runx2	PPIA	∆Ct	∆∆Ct	Fold ∆
AA/TH 1	17.7258	14.4381	3.28778	AA/TH 1	18.0202	14.3997	3.62046	0.419247	0.747815
AA/TH 2	17.6266	14.45	3.17663	AA/TH 2	18.3045	14.376	3.92848	0.727266	0.604048
AA/TH 3	17.516	14.4392	3.07679	AA/TH 3	17.9909	14.3234	3.66751	0.466299	0.723819
AA/TH 4	17.6992	14.4355	3.26365	AA/TH 4	18.3098	14.3473	3.96247	0.761261	0.589981
Average	17.6419	14.4407	3.20121	Average	18.1563	14.3616	3.79473	0.593518	0.666416
Median	17.6629	14.4386	3.22014	Median	18.1623	14.3617	3.79799	0.596782	0.663933
SD	0.0938365	0.0063753	0.0957052	SD	0.17455	0.0332938	0.175671	0.175671	0.0809384
	P value								0.0404692
Runx2	0.00203098
PPIA	0.00344696
Ct	0.00102235
Relative Fold	0.591652
Fold Incr	0.662725
Cntrl shRNA	Runx2	PPIA	∆Ct	Runx2 #90	Runx2	PPIA	∆Ct	∆∆Ct	Fold ∆
AA 1	17.2962	14.3564	2.9397	AA 1	18.3806	14.3195	4.06109	0.932737	0.523864
AA 2	17.5377	14.3453	3.19237	AA 2	18.3959	14.3522	4.04366	0.91531	0.53023
AA 3	17.7995	14.4572	3.34229	AA 3	18.28	14.3484	3.93152	0.803171	0.573088
AA 4	17.4138	14.3748	3.03904	AA 4	18.4619	14.3674	4.09453	0.966182	0.511859
Average	17.5118	14.3835	3.12835	Average	18.3796	14.3469	4.0327	0.90435	0.53476
Median	17.4758	14.3656	3.1157	Median	18.3882	14.3503	4.05237	0.924023	0.527047
SD	0.21568	0.0506583	0.176478	SD	0.0752003	0.0199807	0.0706786	0.0706786	0.0266632
	P value								0.0133316
Runx2	0.000270478
PPIA	0.227859
Ct	7.68856e-05
Relative Fold	0.950681
Fold Incr	0.534273

## Sheet: Dlx3
Source Data for Figure 9C_ Runx2 shRNA with TH, AA, or AA/TH
2018#23 - Control and Runx2 #90 shRNA (mission) 3d treatment BG, BAA, TH & BAA/TH									2021-04-19	PPIA
ATDC5 cells - Hit with virus 1x, hit with puro									2021-05-03	Dlx3
10% FBS then switched to 5% FBS									threshold 0.04
RT done by GG
Cntrl shRNA	Dlx3	PPIA	∆Ct	Runx2 #90	Dlx3	PPIA	∆Ct	∆∆Ct	Fold ∆
TH 1	28.3192	14.585	13.7343	TH 1	30.0364	14.5484	15.488	1.15426	0.449298
TH 2	29.9807	14.5564	15.4244	TH 2	31.1597	14.5369	16.6228	2.28901	0.204616
TH 3	28.5631	14.6409	13.9222	TH 3	29.9746	14.5773	15.3973	1.06354	0.478456
TH 4	28.8204	14.566	14.2544	TH 4	29.6324	14.5609	15.0715	0.737666	0.599709
Average	28.9209	14.5871	14.3338	Average	30.2008	14.5559	15.6449	1.31112	0.433019
Median	28.6917	14.5755	14.0883	Median	30.0055	14.5547	15.4427	1.1089	0.463877
SD	0.735596	0.0378233	0.758174	SD	0.66353	0.0172953	0.676023	0.676023	0.165613
	P value								0.0828065
Dlx3	0.0415427
PPIA	0.184382
Ct	0.041687
Relative Fold	3.94873
Fold Incr	0.403008
2018#19 - Control and RUNX2#90 shRNA (mission) 3d treatment BAA & BAA/TH
Cntrl shRNA	Dlx3	PPIA	∆Ct	RUNX2 #90	Dlx3	PPIA	∆Ct	∆∆Ct	Fold ∆
BAA/TH 1	29.3778	14.7353	14.6425	BAA/TH 1	28.8254	14.6532	14.1722	0.389722	0.763277
BAA/TH 2	27.3755	14.6444	12.7311	BAA/TH 2	28.4363	14.7429	13.6934	-0.0890853	1.0637
BAA/TH 3	28.8386	14.8647	13.9739	BAA/TH 3	27.6283	14.6089	13.0194	-0.76306	1.69709
Average	28.5306	14.7481	13.7825	Average	28.2967	14.6683	13.6283	-0.154141	1.17469
Median	28.8386	14.7353	13.9739	Median	28.4363	14.6532	13.6934	-0.0890853	1.0637
SD	1.03605	0.110675	0.969994	SD	0.610647	0.0682885	0.579138	0.579138	0.476696
	P value								0.238348
Dlx3	0.753125
PPIA	0.347868
Ct	0.824791
Relative Fold	0.180623
Fold Incr	1.11276
Cntrl shRNA	Dlx3	PPIA	∆Ct	RUNX2 #90	Dlx3	PPIA	∆Ct	∆∆Ct	Fold ∆
BAA 1	30.6328	15.0055	15.6273	BAA 1	28.9492	14.5907	14.3585	-0.804083	1.74604
BAA 2	30.1742	14.82	15.3542	BAA 2	27.3755	14.6444	12.7311	-2.43154	5.39471
BAA 3	29.323	14.8168	14.5062	BAA 3	28.141	14.5649	13.5761	-1.58648	3.00317
Average	30.0434	14.8808	15.1626	Average	28.1552	14.6	13.5552	-1.60737	3.3813
Median	30.1742	14.82	15.3542	Median	28.141	14.5907	13.5761	-1.58648	3.00317
SD	0.664626	0.108009	0.584595	SD	0.786955	0.0405868	0.813932	0.813932	1.85349
	P value								0.926747
Dlx3	0.0337006
PPIA	0.0135401
Ct	0.0499119
Relative Fold	0.629545
Fold Incr	3.04696

## Sheet: Dlx5
Source Data for Figure 9C_ Runx2 shRNA with TH, AA, or AA/TH
2018#23 - Control and Runx2 #90 shRNA (mission) 3d treatment BG, BAA, TH & BAA/TH									2021-04-19	PPIA
ATDC5 cells - Hit with virus 1x, hit with puro									2021-04-23	Dlx5
10% FBS then switched to 5% FBS									threshold 0.04
RT done by GG
Cntrl shRNA	Dlx5	PPIA	∆Ct	Runx2 #90	Dlx5	PPIA	∆Ct	∆∆Ct	Fold ∆
TH 1	20.5654	14.585	5.98046	TH 1	20.6653	14.5484	6.11694	0.245611	0.843459
TH 2	20.3806	14.5564	5.8243	TH 2	21.0169	14.5369	6.47997	0.608639	0.655815
TH 3	20.5794	14.6409	5.93843	TH 3	20.633	14.5773	6.05571	0.184374	0.880031
TH 4	20.3082	14.566	5.74214	TH 4	20.8412	14.5609	6.28027	0.408938	0.753178
Average	20.4584	14.5871	5.87133	Average	20.7891	14.5559	6.23322	0.36189	0.783121
Median	20.473	14.5755	5.88136	Median	20.7533	14.5547	6.19861	0.327275	0.798318
SD	0.135037	0.0378233	0.108497	SD	0.177299	0.0172953	0.189852	0.189852	0.100226
	P value								0.0501128
Dlx5	0.0250307
PPIA	0.184382
Ct	0.0162055
Relative Fold	0.304419
Fold Incr	0.778144
2018#19 - Control and RUNX2#90 shRNA (mission) 3d treatment BAA & BAA/TH
Cntrl shRNA	Dlx5	PPIA	∆Ct	RUNX2 #90	Dlx5	PPIA	∆Ct	∆∆Ct	Fold ∆
BAA/TH 1	19.6168	14.7353	4.88154	BAA/TH 1	19.5042	14.6532	4.85099	-0.0428042	1.03011
BAA/TH 2	19.8287	14.9227	4.90605	BAA/TH 2	19.3595	14.7429	4.61658	-0.277219	1.21186
BAA/TH 3				BAA/TH 3	19.472	14.6089	4.86306	-0.0307422	1.02154
Average	19.7228	14.8409	4.8938	Average	19.4452	14.6683	4.77688	-0.116922	1.08784
Median	19.7228	14.8647	4.8938	Median	19.472	14.6532	4.85099	-0.0428042	1.03011
SD	0.149858	0.0959483	0.0173342	SD	0.0759616	0.0682885	0.138953	0.138953	0.107491
	P value								0.0537453
Dlx5	0.0647866
PPIA	0.160056
Ct	0.342633
Relative Fold	0.00048535
Fold Incr	1.08442
Cntrl shRNA	Dlx5	PPIA	∆Ct	RUNX2 #90	Dlx5	PPIA	∆Ct	∆∆Ct	Fold ∆
BAA 1	20.1534	15.0055	5.14798	BAA 1	19.5391	14.5907	4.94836	-0.0267506	1.01872
BAA 2	19.7452	14.82	4.92516	BAA 2	19.475	14.6444	4.83052	-0.144586	1.10541
BAA 3	19.669	14.8168	4.85219	BAA 3	19.4187	14.5649	4.85382	-0.121285	1.0877
Average	19.8559	14.8808	4.97511	Average	19.4776	14.6	4.87757	-0.0975405	1.07061
Median	19.7452	14.82	4.92516	Median	19.475	14.5907	4.85382	-0.121285	1.0877
SD	0.260512	0.108009	0.154095	SD	0.0602155	0.0405868	0.062403	0.062403	0.0458068
	P value								0.0229034
Dlx5	0.0704134
PPIA	0.0135401
Ct	0.366999
Relative Fold	0.00123464
Fold Incr	1.06995

## Sheet: Dlx6
Source Data for Figure 9C_ Runx2 shRNA with TH, AA, or AA/TH
2018#23 - Control and Runx2 #90 shRNA (mission) 3d treatment BG, BAA, TH & BAA/TH									2021-04-19	PPIA
ATDC5 cells - Hit with virus 1x, hit with puro									2021-04-23	Dlx6
10% FBS then switched to 5% FBS									threshold 0.04
RT done by GG
Cntrl shRNA	Dlx6	PPIA	∆Ct	Runx2 #90	Dlx6	PPIA	∆Ct	∆∆Ct	Fold ∆
TH 1	20.8125	14.585	6.22748	TH 1	21.3548	14.5484	6.80636	0.476085	0.718926
TH 2	20.9336	14.5564	6.37723	TH 2	21.6146	14.5369	7.07771	0.747442	0.595659
TH 3	20.9353	14.6409	6.29442	TH 3	21.1415	14.5773	6.56428	0.23401	0.850268
TH 4	20.988	14.566	6.42196	TH 4	21.2964	14.5609	6.73548	0.405209	0.755127
Average	20.9173	14.5871	6.33027	Average	21.3518	14.5559	6.79596	0.465687	0.729995
Median	20.9345	14.5755	6.33582	Median	21.3256	14.5547	6.77092	0.440647	0.737026
SD	0.0743417	0.0378233	0.0865337	SD	0.196955	0.0172953	0.213562	0.213562	0.105303
	P value								0.0526513
Dlx6	0.00616131
PPIA	0.184382
Ct	0.00678774
Relative Fold	0.461378
Fold Incr	0.724126
2018#19 - Control and RUNX2#90 shRNA (mission) 3d treatment BAA & BAA/TH
Cntrl shRNA	Dlx6	PPIA	∆Ct	RUNX2 #90	Dlx6	PPIA	∆Ct	∆∆Ct	Fold ∆
BAA/TH 1	21.2734	14.7353	6.53814	BAA/TH 1	20.948	14.6532	6.29475	-0.0214656	1.01499
BAA/TH 2	20.8415	14.9227	5.91879	BAA/TH 2	21.2333	14.7429	6.49034	0.174118	0.886309
BAA/TH 3	21.3564	14.8647	6.49172	BAA/TH 3	20.8713	14.6089	6.2624	-0.0538143	1.03801
Average	21.1571	14.8409	6.31622	Average	21.0175	14.6683	6.34916	0.032946	0.979768
Median	21.2734	14.8647	6.49172	Median	20.948	14.6532	6.29475	-0.0214656	1.01499
SD	0.276463	0.0959483	0.344962	SD	0.190743	0.0682885	0.123324	0.123324	0.0817518
	P value								0.0408759
Dlx6	0.511471
PPIA	0.0641585
Ct	0.883762
Relative Fold	0.0244202
Fold Incr	0.977422
Cntrl shRNA	Dlx6	PPIA	∆Ct	RUNX2 #90	Dlx6	PPIA	∆Ct	∆∆Ct	Fold ∆
BAA 1	21.8337	15.0055	6.82823	BAA 1	20.7955	14.5907	6.2048	-0.404259	1.32341
BAA 2	21.4244	14.82	6.60439	BAA 2	20.8095	14.6444	6.16504	-0.44402	1.36039
BAA 3	21.2113	14.8168	6.39456	BAA 3	20.5182	14.5649	5.95327	-0.655795	1.57548
Average	21.4898	14.8808	6.60906	Average	20.7077	14.6	6.1077	-0.501358	1.41976
Median	21.4244	14.82	6.60439	Median	20.7955	14.5907	6.16504	-0.44402	1.36039
SD	0.316288	0.108009	0.216872	SD	0.164312	0.0405868	0.135216	0.135216	0.136122
	P value								0.0680609
Dlx6	0.0190932
PPIA	0.0135401
Ct	0.0273331
Relative Fold	0.13406
Fold Incr	1.41555

## Sheet: Sp7
Source Data for Figure 9C_ Runx2 shRNA with TH, AA, or AA/TH
2018#23 - Control and Runx2 #90 shRNA (mission) 3d treatment BG, BAA, TH & BAA/TH									2021-04-19	PPIA
ATDC5 cells - Hit with virus 1x, hit with puro									2021-04-19	Sp7
10% FBS then switched to 5% FBS									threshold 0.04
RT done by GG
Cntrl shRNA	Sp7	PPIA	∆Ct	Runx2 #90	Sp7	PPIA	∆Ct	∆∆Ct	Fold ∆
TH 1	21.2224	14.585	6.63747	TH 1	22.0805	14.5484	7.53206	0.863508	0.549614
TH 2	21.1848	14.5564	6.62843	TH 2	22.3108	14.5369	7.77385	1.1053	0.464807
TH 3	21.3057	14.6409	6.66473	TH 3	21.9811	14.5773	7.40387	0.735314	0.600687
TH 4	21.3096	14.566	6.74357	TH 4	22.2249	14.5609	7.66392	0.995372	0.501606
Average	21.2556	14.5871	6.66855	Average	22.1493	14.5559	7.59343	0.924873	0.529179
Median	21.2641	14.5755	6.6511	Median	22.1527	14.5547	7.59799	0.92944	0.52561
SD	0.0620091	0.0378233	0.0523389	SD	0.146981	0.0172953	0.160438	0.160438	0.0589777
	P value								0.0294888
Sp7	3.01809e-05
PPIA	0.184382
Ct	3.42493e-05
Relative Fold	1.1779
Fold Incr	0.526727
2018#19 - Control and RUNX2#90 shRNA (mission) 3d treatment BAA & BAA/TH
Cntrl shRNA	Sp7	PPIA	∆Ct	RUNX2 #90	Sp7	PPIA	∆Ct	∆∆Ct	Fold ∆
BAA/TH 1	20.2488	14.7353	5.51355	BAA/TH 1	20.7657	14.6532	6.1125	0.443437	0.73538
BAA/TH 2	20.3741	14.9227	5.45142	BAA/TH 2	20.8347	14.7429	6.09181	0.422748	0.746002
BAA/TH 3	20.9069	14.8647	6.04222	BAA/TH 3	20.3739	14.6089	5.76505	0.0959889	0.935631
Average	20.5099	14.8409	5.66906	Average	20.6581	14.6683	5.98979	0.320725	0.805671
Median	20.3741	14.8647	5.51355	Median	20.7657	14.6532	6.09181	0.422748	0.746002
SD	0.349434	0.0959483	0.324651	SD	0.248524	0.0682885	0.194902	0.194902	0.112674
	P value								0.0563368
Sp7	0.581676
PPIA	0.0641585
Ct	0.216263
Relative Fold	0.265871
Fold Incr	0.800668
Cntrl shRNA	Sp7	PPIA	∆Ct	RUNX2 #90	Sp7	PPIA	∆Ct	∆∆Ct	Fold ∆
BAA 1	21.2607	15.0055	6.25528	BAA 1	22.0112	14.5907	7.42049	1.44579	0.36709
BAA 2	21.0849	14.82	6.26492	BAA 2	21.6918	14.6444	7.04736	1.07267	0.47544
BAA 3	20.2207	14.8168	5.40389	BAA 3	21.7258	14.5649	7.16087	1.18617	0.439467
Average	20.8555	14.8808	5.9747	Average	21.8096	14.6	7.20958	1.23488	0.427332
Median	21.0849	14.82	6.25528	Median	21.7258	14.5907	7.16087	1.18617	0.439467
SD	0.556718	0.108009	0.494354	SD	0.175418	0.0405868	0.191272	0.191272	0.0551846
	P value								0.0275923
Sp7	0.0472835
PPIA	0.0135401
Ct	0.0156674
Relative Fold	2.0339
Fold Incr	0.424878

## Sheet: Col1a1
Source Data for Figure 9C_ Runx2 shRNA with TH, AA, or AA/TH
2018#19 - Control and RUNX2#90 shRNA (mission) 3d treatment BAA & BAA/TH									2018-11-26	PPIA
ATDC5 cells - Hit with virus 1x, hit with puro									2018-12-12	Col1a1
10% FBS then switched to 5% FBS									0.04 threshold JL
Cntrl shRNA	Col1a1	PPIA	∆Ct	Runx2 #90	Col1a1	PPIA	∆Ct	∆∆Ct	Fold ∆
TH 1	26.133	14.585	11.5481	TH 1	27.4614	14.5484	12.913	1.34624	0.393316
TH 2	25.9912	14.5564	11.4348	TH 2	27.5278	14.5369	12.9909	1.4241	0.372651
TH 3	26.2725	14.6409	11.6316	TH 3	27.6602	14.5773	13.083	1.51617	0.349613
TH 4	26.2188	14.566	11.6528	TH 4	27.6619	14.5609	13.1009	1.53412	0.34529
Average	26.1539	14.5871	11.5668	Average	27.5778	14.5559	13.022	1.45516	0.365218
Median	26.1759	14.5755	11.5898	Median	27.594	14.5547	13.0369	1.47014	0.361132
SD	0.122742	0.0378233	0.0989273	SD	0.099826	0.0172953	0.0871496	0.0871496	0.0222516
	P value								0.0111258
Col1a1.2	1.89067e-06
PPIA	0.184382
Ct	5.64917e-07
Relative Fold	2.37871
Fold Incr	0.364715
Cntrl shRNA	Col1a1	PPIA	∆Ct	RUNX2 #90	Col1a1	PPIA	∆Ct	∆∆Ct	Fold ∆
BAA/TH 1	14.0094	14.7353	-0.725903	BAA/TH 1	14.5981	14.6532	-0.0550995	0.726982	0.604166
BAA/TH 2	14.1454	14.9227	-0.777269	BAA/TH 2	14.5355	14.7429	-0.207407	0.574675	0.671438
BAA/TH 3	14.0216	14.8647	-0.843074	BAA/TH 3	14.5342	14.6089	-0.0747051	0.707377	0.612433
Average	14.0588	14.8409	-0.782082	Average	14.5559	14.6683	-0.112404	0.669678	0.629345
Median	14.0216	14.8647	-0.777269	Median	14.5355	14.6532	-0.0747051	0.707377	0.612433
SD	0.0752656	0.0959483	0.0587337	SD	0.0365293	0.0682885	0.0828571	0.0828571	0.0366863
	P value								0.0183432
Col1a1	0.00050259
PPIA	0.0641585
Ct	0.000335351
Relative Fold	0.566309
Fold Incr	0.628647
Cntrl shRNA	Col1a1		∆Ct	RUNX2 #90	Col1a1	PPIA	∆Ct	∆∆Ct	Fold ∆
BAA 1	14.069	15.0055	-0.936433	BAA 1	14.4807	14.5907	-0.110043	0.690166	0.619783
BAA 2	14.045	14.82	-0.775057	BAA 2	14.4468	14.6444	-0.197633	0.602576	0.658577
BAA 3	14.1276	14.8168	-0.689136	BAA 3	14.3848	14.5649	-0.180122	0.620086	0.650632
Average	14.0805	14.8808	-0.800208	Average	14.4374	14.6	-0.162599	0.637609	0.642997
Median	14.069	14.82	-0.775057	Median	14.4468	14.5907	-0.180122	0.620086	0.650632
SD	0.042524	0.108009	0.125553	SD	0.0486316	0.0405868	0.0463498	0.0463498	0.0204932
	P value								0.0102466
Col1a1	0.000666563
PPIA	0.0135401
Ct	0.00117652
Relative Fold	0.4678
Fold Incr	0.642777

## Sheet: Col2a1
Source Data for Figure 9C_ Runx2 shRNA with TH, AA, or AA/TH
2018#23 - Control and Runx2 #90 shRNA (mission) 3d treatment BG, BAA, TH & BAA/TH									2021-04-19	PPIA
ATDC5 cells - Hit with virus 1x, hit with puro									2021-05-05	Col2a1
10% FBS then switched to 5% FBS									threshold 0.04
RT done by GG
Cntrl shRNA	Col2a1	PPIA	∆Ct	Runx2 #90	Col2a1	PPIA	∆Ct	∆∆Ct	Fold ∆
TH 1	19.894	14.585	5.30899	TH 1	19.9513	14.5484	5.4029	0.0314128	0.978462
TH 2	19.9134	14.5564	5.35709	TH 2	20.2262	14.5369	5.68929	0.317803	0.802291
TH 3	20.1395	14.6409	5.49857	TH 3	20.1791	14.5773	5.6019	0.23041	0.852392
TH 4	19.8873	14.566	5.32129	TH 4	20.529	14.5609	5.96809	0.596601	0.66131
Average	19.9586	14.5871	5.37149	Average	20.2214	14.5559	5.66554	0.294057	0.823614
Median	19.9037	14.5755	5.33919	Median	20.2027	14.5547	5.64559	0.274107	0.827342
SD	0.121137	0.0378233	0.0871435	SD	0.237625	0.0172953	0.234613	0.234613	0.131153
	P value								0.0655764
Col2a1	0.0961976
PPIA	0.184382
Ct	0.0570681
Relative Fold	0.279492
Fold Incr	0.815605
Cntrl shRNA	Col2a1	PPIA	∆Ct	RUNX2 #90	Col2a1	PPIA	∆Ct	∆∆Ct	Fold ∆
AA/TH 1	17.7258	14.4381	3.28778	AA/TH 1	18.0202	14.3997	3.62046	0.419247	0.747815
AA/TH 2	17.6266	14.45	3.17663	AA/TH 2	18.3045	14.376	3.92848	0.727266	0.604048
AA/TH 3	17.516	14.4392	3.07679	AA/TH 3	17.9909	14.3234	3.66751	0.466299	0.723819
AA/TH 4	17.6992	14.4355	3.26365	AA/TH 4	18.3098	14.3473	3.96247	0.761261	0.589981
Average	17.6419	14.4407	3.20121	Average	18.1563	14.3616	3.79473	0.593518	0.666416
Median	17.6629	14.4386	3.22014	Median	18.1623	14.3617	3.79799	0.596782	0.663933
SD	0.0938365	0.0063753	0.0957052	SD	0.17455	0.0332938	0.175671	0.175671	0.0809384
	P value								0.0404692
Runx2	0.00203098
PPIA	0.00344696
Ct	0.00102235
Relative Fold	0.591652
Fold Incr	0.662725
Cntrl shRNA	Col2a1	PPIA	∆Ct	RUNX2 #90	Col2a1	PPIA	∆Ct	∆∆Ct	Fold ∆
AA 1	17.2962	14.3564	2.9397	AA 1	18.3806	14.3195	4.06109	0.932737	0.523864
AA 2	17.5377	14.3453	3.19237	AA 2	18.3959	14.3522	4.04366	0.91531	0.53023
AA 3	17.7995	14.4572	3.34229	AA 3	18.28	14.3484	3.93152	0.803171	0.573088
AA 4	17.4138	14.3748	3.03904	AA 4	18.4619	14.3674	4.09453	0.966182	0.511859
Average	17.5118	14.3835	3.12835	Average	18.3796	14.3469	4.0327	0.90435	0.53476
Median	17.4758	14.3656	3.1157	Median	18.3882	14.3503	4.05237	0.924023	0.527047
SD	0.21568	0.0506583	0.176478	SD	0.0752003	0.0199807	0.0706786	0.0706786	0.0266632
	P value								0.0133316
Runx2	0.000270478
PPIA	0.227859
Ct	7.68856e-05
Relative Fold	0.950681
Fold Incr	0.534273

## Sheet: Col10a1
Source Data for Figure 9C_ Runx2 shRNA with TH, AA, or AA/TH
2018#23 - Control and Runx2 #90 shRNA (mission) 3d treatment BG, BAA, TH & BAA/TH									2021-04-19	PPIA
ATDC5 cells - Hit with virus 1x, hit with puro									2021-04-30	Col10a1
10% FBS then switched to 5% FBS									threshold 0.04
RT done by GG
Cntrl shRNA	Col10a1	PPIA	∆Ct	Runx2 #90	Col10a1	PPIA	∆Ct	∆∆Ct	Fold ∆
TH 1	26.2966	14.585	11.7117	TH 1	25.6061	14.5484	11.0576	-0.827442	1.77454
TH 2	26.2206	14.5564	11.6642	TH 2	25.8961	14.5369	11.3592	-0.525917	1.43985
TH 3	26.783	14.6409	12.1421	TH 3	25.6248	14.5773	11.0476	-0.837515	1.78697
TH 4	26.5885	14.566	12.0225	TH 4	25.4014	14.5609	10.8404	-1.04467	2.06289
Average	26.4722	14.5871	11.8851	Average	25.6321	14.5559	11.0762	-0.808886	1.76606
Median	26.4425	14.5755	11.8671	Median	25.6154	14.5547	11.0526	-0.832479	1.78075
SD	0.260934	0.0378233	0.233647	SD	0.203034	0.0172953	0.213564	0.213564	0.254971
	P value								0.127486
Col10a1	0.00226155
PPIA	0.184382
Ct	0.00219814
Relative Fold	0.354408
Fold Incr	1.75186
2018#19 - Control and RUNX2 #90 shRNA (mission) 3d treatment BAA & BAA/TH
Cntrl shRNA	Col10a1	PPIA	∆Ct	RUNX2 #90	Col10a1	PPIA	∆Ct	∆∆Ct	Fold ∆
BAA/TH 1	21.5039	14.7353	6.76859	BAA/TH 1	22.1929	14.6532	7.53964	0.741726	0.598023
BAA/TH 2	21.5608	14.9227	6.6381	BAA/TH 2	22.3187	14.7429	7.57573	0.777817	0.583249
BAA/TH 3	21.8517	14.8647	6.98705	BAA/TH 3	21.9357	14.6089	7.32676	0.528843	0.69311
Average	21.6388	14.8409	6.79792	Average	22.1491	14.6683	7.48071	0.682796	0.624794
Median	21.5608	14.8647	6.76859	Median	22.1929	14.6532	7.53964	0.741726	0.598023
SD	0.186592	0.0959483	0.176313	SD	0.195227	0.0682885	0.134542	0.134542	0.059623
	P value								0.0298115
Col10a1	0.0307109
PPIA	0.0641585
Ct	0.00595563
Relative Fold	0.668041
Fold Incr	0.622957
Cntrl shRNA	Col10a1	PPIA	∆Ct	RUNX2 #90	Col10a1	PPIA	∆Ct	∆∆Ct	Fold ∆
BAA 1	21.9365	15.0055	6.93107	BAA 1	22.4011	14.5907	7.81043	0.959326	0.514297
BAA 2	21.7371	14.82	6.9171	BAA 2	22.1635	14.6444	7.51908	0.667976	0.629389
BAA 3	21.5219	14.8168	6.70515	BAA 3	22.0114	14.5649	7.44651	0.595403	0.661859
Average	21.7319	14.8808	6.85111	Average	22.192	14.6	7.59201	0.740902	0.601848
Median	21.7371	14.82	6.9171	Median	22.1635	14.5907	7.51908	0.667976	0.629389
SD	0.207347	0.108009	0.126592	SD	0.196423	0.0405868	0.19261	0.19261	0.0775405
	P value								0.0387702
Col10a1	0.0492825
PPIA	0.0135401
Ct	0.00509779
Relative Fold	0.871445
Fold Incr	0.598365

## Sheet: Bglap2
Source Data for Figure 9C_ Runx2 shRNA with TH, AA, or AA/TH
2018#23 - Control and RUNX2 #90 shRNA (mission) 3d treatment BG, BAA, TH & BAA/TH									2020-04-06	PPIA
ATDC5 cells - Hit with virus 1x, hit with puro									2020-04-06	Bglap2
10% FBS then switched to 5% FBS									threshold 0.04	JL
** New RT On BG group on 3/17/2020
Cntrl shRNA	Bglap2	PPIA	∆Ct	RUNX2	Bglap2	PPIA	∆Ct	∆∆Ct	Fold ∆
TH 1	29.2637	14.585	14.6787	TH 1	24.4695	14.5484	9.92111	-4.14948	17.7467
TH 2	28.652	14.5564	14.0957	TH 2	24.2907	14.5369	9.7538	-4.31679	19.9289
TH 3	28.5169	14.6409	13.876	TH 3	24.1432	14.5773	9.56594	-4.50465	22.7004
TH 4	28.198	14.566	13.632	TH 4	24.1987	14.5609	9.63772	-4.43286	21.5986
Average	28.6577	14.5871	14.0706	Average	24.2755	14.5559	9.71964	-4.35095	20.4937
Median	28.5845	14.5755	13.9858	Median	24.2447	14.5547	9.69576	-4.37483	20.7638
SD	0.446609	0.0378233	0.447467	SD	0.142923	0.0172953	0.155016	0.155016	2.1568
	P value								1.0784
Bglap2	1.51423e-06
PPIA	0.184382
Ct	1.67408e-06
Relative Fold	17.6058
Fold Incr	20.4063
Cntrl shRNA	Bglap2	PPIA	∆Ct	RUNX2	Bglap2	PPIA	∆Ct	∆∆Ct	Fold ∆
AA/TH 1	23.9071	14.4566	9.45047	AA/TH 1	19.9437	14.3795	5.56421	-3.93456	15.2905
AA/TH 2	24.4153	14.345	10.0703	AA/TH 2	20.7972	14.3637	6.43348	-3.06529	8.37039
AA/TH 3	23.5071	14.3997	9.1074	AA/TH 3	20.5397	14.3459	6.19384	-3.30493	9.88289
AA/TH 4	23.745	14.3781	9.36693	AA/TH 4	20.3915	14.3758	6.01567	-3.4831	11.182
Average	23.8936	14.3949	9.49878	Average	20.418	26.9558	6.0518	-3.44697	11.1814
Median	23.8261	14.3889	9.4087	Median	20.4656	14.3697	6.10476	-3.39402	10.5324
SD	0.384615	0.0469268	0.408055	SD	0.357882	0.0151492	0.36738	0.36738	2.97055
	P value								1.48528
Bglap2	1.1515e-05
PPIA	0.289395
Ct	1.5619e-05
Relative Fold	9.4839
Fold Incr	10.9054
Cntrl shRNA	Bglap2	PPIA	∆Ct	RUNX2	Bglap2	PPIA	∆Ct	∆∆Ct	Fold ∆
AA 1	27.8512		27.8512	AA 1	25.4765	14.3406	11.1359	-3.07066	8.40159
AA 2	28.752	14.3487	14.4032	AA 2	25.8364	14.3762	11.4602	-2.7464	6.71042
AA 3				AA 3
AA 4	28.3817	14.3719	14.0099	AA 4	24.9391	14.3548	10.5843	-3.62229	12.3145
Average	28.3283	14.3603	14.2066	Average	25.4173	14.3572	11.0601	-3.14645	9.14217
Median	28.3817	14.3603	14.4032	Median	25.4765	14.3548	11.1359	-3.07066	8.40159
SD	0.45278	0.0163563	7.88017	SD	0.451573	0.0179479	0.442833	0.442833	2.87451
	P value								1.43726
Bglap2	0.00139914
PPIA	0.859295
Ct	0.166564
Relative Fold	7.30955
Fold Incr	8.85475

[truncated: 7 more sheets: Ibsp, Mgp, Spp1, Dmp1,  Mmp9, Mmp13, Alpl]
