# Supplementary material for: Differences in pathways contributing to thyroid hormone effects on postnatal cartilage calcification versus secondary ossification center development
Source: eLife. 2022 Jan 31;11:e76730. doi: 10.7554/eLife.76730 (PMC8830887; doi:10.7554/eLife.76730)
Supplement: Figure 9—source data 3. — Reverse transcriptase quantitative polymerase chain reaction (RT-qPCR) data for SP7 shRNA. Average fold changes plotted and t-test values are highlighted in yellow. [file elife-76730-fig9-data3.xlsx]

## Sheet: Sox9
Source Data for Figure 9D_SP7/OSX shRNA with TH, AA, or AA/TH
2018#25 - Control and SP7 #59 shRNA (mission) 3d treatment BG, BAA, TH & BAA/TH									2021-04-21	PPIA
ATDC5 cells - Hit with virus 1x, hit with puro									2021-04-21	Sox9
10% FBS then switched to 5% FBS									threshold 0.04	DL
Cntrl shRNA	Sox9	PPIA	∆Ct	SP7 #59	Sox9	PPIA	∆Ct	∆∆Ct	Fold ∆
TH 1	18.7941	14.4528	4.34126	TH 1
TH 2	18.743	14.4137	4.32932	TH 2	19.7308	14.5593	5.17148	0.77396	0.58481
TH 3	19.1468	14.6049	4.54197	TH 3	19.8188	14.4911	5.32767	0.930143	0.524806
TH 4	18.937	14.5595	4.37755	TH 4	19.3139	14.414	4.89995	0.502423	0.70592
Average	18.9052	14.5077	4.39753	Average	19.6212	14.4882	5.13303	0.735509	0.605179
Median	18.8656	14.5062	4.35941	Median	19.7308	14.4911	5.17148	0.77396	0.58481
SD	0.180793	0.089394	0.0984568	SD	0.269694	0.0727071	0.216437	0.216437	0.092259
	P value								0.0461295
Sox9	0.00811133
PPIA	0.770374
Ct	0.00165784
Relative Fold	0.906201
Fold Incr	0.600606
2018 #19 - Control and SP7 #59 shRNA (mission) 3d treatment BAA & BAA/TH
Cntrl shRNA	Sox9	PPIA	∆Ct	SP7 #59	Sox9	PPIA	∆Ct	∆∆Ct	Fold ∆
BAA/TH 1	18.8144	14.7353	4.07912	BAA/TH 1	19.7478	14.651	5.09674	0.923382	0.527271
BAA/TH 2	19.563	14.9227	4.64036	BAA/TH 2	19.7319	14.561	5.17084	0.99748	0.500874
BAA/TH 3	18.6653	14.8647	3.80059	BAA/TH 3	19.7579	14.6452	5.11278	0.939418	0.521443
Average	19.0142	14.8409	4.17336	Average	19.7459	14.6191	5.12678	0.953427	0.51653
Median	18.8144	14.8647	4.07912	Median	19.7478	14.6452	5.11278	0.939418	0.521443
SD	0.481098	0.0959483	0.427743	SD	0.0131263	0.0503355	0.0389847	0.0389847	0.0138677
	P value								0.00693384
Sox9	0.0580031
PPIA	0.0238909
Ct	0.0183847
Relative Fold	0.98488
Fold Incr	0.516404
Cntrl shRNA	Sox9	PPIA	∆Ct	SP7 #59	Sox9	PPIA	∆Ct	∆∆Ct	Fold ∆
BAA 1	18.915	15.0055	3.9095	BAA 1	19.6025	14.5872	5.01531	0.982445	0.506121
BAA 2	18.6115	14.82	3.79152	BAA 2	19.5926	14.5518	5.04078	1.00792	0.497264
BAA 3	19.2144	14.8168	4.39757	BAA 3	19.7457	15.1466	4.59904	0.566175	0.675405
Average	18.9136	14.8808	4.03287	Average	19.6469	14.7619	4.88504	0.852179	0.559597
Median	18.915	14.82	3.9095	Median	19.6025	14.5872	5.01531	0.982445	0.506121
SD	0.301403	0.108009	0.321308	SD	0.0856532	0.333665	0.248013	0.248013	0.100391
	P value								0.0501953
Sox9	0.015431
PPIA	0.588681
Ct	0.0220334
Relative Fold	1.21042
Fold Incr	0.553948

## Sheet: Runx2
Source Data for Figure 9D_SP7/OSX shRNA with TH, AA, or AA/TH
2018#25 - Control and SP7 #59 shRNA (mission) 3d treatment BG, BAA, TH & BAA/TH									2021-04-21	PPIA
ATDC5 cells - Hit with virus 1x, hit with puro									2021-04-21	Runx2
10% FBS then switched to 5% FBS									threshold 0.04	DL
Cntrl shRNA	Runx2	PPIA	∆Ct	SP7 #59	Runx2	PPIA	∆Ct	∆∆Ct	Fold ∆
TH 1	18.8775	14.4528	4.42462	TH 1
TH 2	18.5081	14.4137	4.0944	TH 2	19.1251	14.5593	4.56583	0.490835	0.711613
TH 3	18.6852	14.6049	4.08034	TH 3	19.3205	14.4911	4.82938	0.754381	0.592801
TH 4	18.2601	14.5595	3.70062	TH 4	18.7897	14.414	4.37569	0.30069	0.811864
Average	18.5827	14.5077	4.075	Average	19.0784	14.4882	4.5903	0.515302	0.705426
Median	18.5966	14.5062	4.08737	Median	19.1251	14.4911	4.56583	0.490835	0.711613
SD	0.262696	0.089394	0.295972	SD	0.268482	0.0727071	0.227833	0.227833	0.109663
	P value								0.0548313
Runx2	0.0580011
PPIA	0.770374
Ct	0.055051
Relative Fold	0.552249
Fold Incr	0.699646
2018 #19 - Control and SP7 #59 shRNA (mission) 3d treatment BAA & BAA/TH
Cntrl shRNA	Runx2	PPIA	∆Ct	SP7 #59	Runx2	PPIA	∆Ct	∆∆Ct	Fold ∆
BAA/TH 1	17.5747	14.7353	2.83947	BAA/TH 1	18.2763	14.651	3.62534	0.367657	0.77504
BAA/TH 2	18.3836	14.9227	3.46089	BAA/TH 2	18.392	14.561	3.83091	0.573228	0.672111
BAA/TH 3	18.3374	14.8647	3.47268	BAA/TH 3	18.3098	14.6452	3.66463	0.40695	0.754216
Average	18.0986	14.8409	3.25768	Average	18.326	14.6191	3.70696	0.449278	0.733789
Median	18.3374	14.8647	3.46089	Median	18.3098	14.6452	3.66463	0.40695	0.754216
SD	0.454225	0.0959483	0.362226	SD	0.0594911	0.0503355	0.109127	0.109127	0.05442
	P value								0.02721
Runx2	0.438251
PPIA	0.0238909
Ct	0.108824
Relative Fold	0.311816
Fold Incr	0.732409
Cntrl shRNA	Runx2	PPIA	∆Ct	SP7 #59	Runx2	PPIA	∆Ct	∆∆Ct	Fold ∆
BAA 1	18.5097	15.0055	3.50424	BAA 1	18.4422	14.5872	3.85492	0.689156	0.620217
BAA 2	17.9246	14.82	3.10462	BAA 2	18.2249	14.5518	3.67308	0.507321	0.703527
BAA 3	17.7052	14.8168	2.88843	BAA 3	18.9238	15.1466	3.77723	0.611463	0.654533
Average	18.0465	14.8808	3.16576	Average	18.5303	14.7619	3.76841	0.602647	0.659426
Median	17.9246	14.82	3.10462	Median	18.4422	14.5872	3.77723	0.611463	0.654533
SD	0.415858	0.108009	0.312422	SD	0.357725	0.333665	0.0912371	0.0912371	0.0418703
	P value								0.0209352
Runx2	0.201349
PPIA	0.588681
Ct	0.0326795
Relative Fold	0.481475
Fold Incr	0.658545

## Sheet: Dlx3
Source Data for Figure 9D_SP7/OSX shRNA with TH, AA, or AA/TH
2018#25 - Control and SP7 #59 shRNA (mission) 3d treatment BG, BAA, TH & BAA/TH									2021-04-21	PPIA
ATDC5 cells - Hit with virus 1x, hit with puro									2021-04-27	Dlx3
10% FBS then switched to 5% FBS									threshold 0.04	DL
Cntrl shRNA	Dlx3	PPIA	∆Ct	SP7 #59	Dlx3	PPIA	∆Ct	∆∆Ct	Fold ∆
TH 1	27.7651	14.4528	13.3123	TH 1
TH 2	27.4421	14.4137	13.0284	TH 2	26.9888	14.5593	12.4295	-0.835945	1.78503
TH 3	27.873	14.6049	13.2682	TH 3	26.8332	14.4911	12.3421	-0.923373	1.89654
TH 4	28.0124	14.5595	13.453	TH 4	26.9763	14.414	12.5623	-0.703187	1.6281
Average	27.7732	14.5077	13.2655	Average	26.9328	14.4882	12.4446	-0.820835	1.76989
Median	27.8191	14.5062	13.2902	Median	26.9763	14.4911	12.4295	-0.835945	1.78503
SD	0.242825	0.089394	0.176581	SD	0.0864383	0.0727071	0.110868	0.110868	0.134862
	P value								0.0674308
Dlx3	0.00247381
PPIA	0.770374
Ct	0.000921504
Relative Fold	0.504054
Fold Incr	1.76643
2018 #19 - Control and SP7 #59 shRNA (mission) 3d treatment BAA & BAA/TH
Cntrl shRNA	Dlx3	PPIA	∆Ct	SP7 #59	Dlx3	PPIA	∆Ct	∆∆Ct	Fold ∆
BAA/TH 1	29.3778	14.7353	14.6425	BAA/TH 1	28.4781	14.651	13.8271	0.174316	0.886187
BAA/TH 2	27.2645	14.9227	12.3418	BAA/TH 2	27.8893	14.561	13.3283	-0.324466	1.2522
BAA/TH 3	28.8386	14.8647	13.9739	BAA/TH 3	27.4974	14.6452	12.8523	-0.800476	1.74168
Average	28.4936	14.8409	13.6527	Average	27.9549	14.6191	13.3359	-0.316875	1.29335
Median	28.8386	14.8647	13.9739	Median	27.8893	14.6452	13.3283	-0.324466	1.2522
SD	1.09806	0.0959483	1.1835	SD	0.493605	0.0503355	0.487441	0.487441	0.429226
	P value								0.214613
Dlx3	0.481607
PPIA	0.0238909
Ct	0.690151
Relative Fold	0.0290926
Fold Incr	1.24563
Cntrl shRNA	Dlx3	PPIA	∆Ct	SP7 #59	Dlx3	PPIA	∆Ct	∆∆Ct	Fold ∆
BAA 1	30.6328	15.0055	15.6273	BAA 1	26.869	14.5872	12.2818	-2.88081	7.36563
BAA 2	30.1742	14.82	15.3542	BAA 2	28.5848	14.5518	14.0331	-1.12955	2.1879
BAA 3	29.323	14.8168	14.5062	BAA 3	28.9009	15.1466	13.7542	-1.40836	2.65435
Average	30.0434	14.8808	15.1626	Average	28.1182	14.7619	13.3564	-1.80624	4.06929
Median	30.1742	14.82	15.3542	Median	28.5848	14.5872	13.7542	-1.40836	2.65435
SD	0.664626	0.108009	0.584595	SD	1.09333	0.333665	0.94099	0.94099	2.86423
	P value								1.43211
Dlx3	0.0596686
PPIA	0.588681
Ct	0.0476309
Relative Fold	0.748653
Fold Incr	3.49729

## Sheet: Dlx5
Source Data for Figure 9D_SP7/OSX shRNA with TH, AA, or AA/TH
2018#25 - Control and SP7 #59 shRNA (mission) 3d treatment BG, BAA, TH & BAA/TH									2021-04-21	PPIA
ATDC5 cells - Hit with virus 1x, hit with puro									2021-04-27	Dlx5
10% FBS then switched to 5% FBS									threshold 0.04	DL
Cntrl shRNA	Dlx5	PPIA	∆Ct	SP7 #59	Dlx5	PPIA	∆Ct	∆∆Ct	Fold ∆
TH 1	20.1538	14.4528	5.70097	TH 1
TH 2	20.1684	14.4137	5.75477	TH 2	20.2456	14.5593	5.68625	-0.1662	1.1221
TH 3	20.6149	14.6049	6.01006	TH 3	20.1941	14.4911	5.70294	-0.149511	1.10919
TH 4	20.5035	14.5595	5.944	TH 4	19.7927	14.414	5.37871	-0.473738	1.3887
Average	20.3602	14.5077	5.85245	Average	20.0774	14.4882	5.5893	-0.263149	1.20666
Median	20.336	14.5062	5.84938	Median	20.1941	14.4911	5.68625	-0.1662	1.1221
SD	0.234369	0.089394	0.147998	SD	0.247936	0.0727071	0.182566	0.182566	0.157781
	P value								0.0788907
Dlx5	0.183465
PPIA	0.770374
Ct	0.0877784
Relative Fold	0.00649374
Fold Incr	1.2001
2018 #19 - Control and SP7 #59 shRNA (mission) 3d treatment BAA & BAA/TH
Cntrl shRNA	Dlx5	PPIA	∆Ct	SP7 #59	Dlx5	PPIA	∆Ct	∆∆Ct	Fold ∆
BAA/TH 1	19.6168	14.7353	4.88154	BAA/TH 1	19.8912	14.651	5.24024	0.346441	0.786522
BAA/TH 2	19.8287	14.9227	4.90605	BAA/TH 2	19.574	14.561	5.01298	0.119181	0.92071
BAA/TH 3				BAA/TH 3	19.9896	14.6452	5.34443	0.450634	0.731721
Average	19.7228	14.829	4.8938	Average	19.8183	14.6191	5.19922	0.305418	0.812985
Median	19.7228	14.829	4.8938	Median	19.8912	14.6452	5.24024	0.346441	0.786522
SD	0.149858	0.132524	0.0173342	SD	0.217176	0.0503355	0.169491	0.169491	0.0972336
	P value								0.0486168
Dlx5	0.63265
PPIA	0.0771604
Ct	0.0949061
Relative Fold	0.225539
Fold Incr	0.809207
Cntrl shRNA	Dlx5	PPIA	∆Ct	SP7 #59	Dlx5	PPIA	∆Ct	∆∆Ct	Fold ∆
BAA 1	20.1534	15.0055	5.14798	BAA 1	19.7021	14.5872	5.11487	0.139759	0.907671
BAA 2	19.7452	14.82	4.92516	BAA 2	19.4975	14.5518	4.94572	-0.0293932	1.02058
BAA 3	19.669	14.8168	4.85219	BAA 3	19.8444	15.1466	4.69783	-0.277276	1.2119
Average	19.8559	14.8808	4.97511	Average	19.6814	14.7619	4.91947	-0.0556367	1.04672
Median	19.7452	14.82	4.92516	Median	19.7021	14.5872	4.94572	-0.0293932	1.02058
SD	0.260512	0.108009	0.154095	SD	0.174404	0.333665	0.209753	0.209753	0.153792
	P value								0.0768959
Dlx5	0.389566
PPIA	0.588681
Ct	0.729968
Relative Fold	0.0237517
Fold Incr	1.03932

## Sheet: Dlx6
Source Data for Figure 9D_SP7/OSX shRNA with TH, AA, or AA/TH
2018#25 - Control and SP7 #59 shRNA (mission) 3d treatment BG, BAA, TH & BAA/TH									2021-04-21	PPIA
ATDC5 cells - Hit with virus 1x, hit with puro									2021-04-27	Dlx6
10% FBS then switched to 5% FBS									threshold 0.04	DL
Cntrl shRNA	Dlx6	PPIA	∆Ct	SP7 #59	Dlx6	PPIA	∆Ct	∆∆Ct	Fold ∆
TH 1	21.0033	14.4528	6.55042	TH 1
TH 2	21.2368	14.4137	6.82311	TH 2	21.164	14.5593	6.60464	-0.164792	1.121
TH 3	21.4667	14.6049	6.86183	TH 3	21.1988	14.4911	6.70764	-0.0617893	1.04376
TH 4	21.4018	14.5595	6.84236	TH 4	21.6202	14.414	7.20618	0.436751	0.738797
Average	21.2771	14.5077	6.76943	Average	21.3276	14.4882	6.83949	0.0700565	0.967853
Median	21.3193	14.5062	6.83274	Median	21.1988	14.4911	6.70764	-0.0617893	1.04376
SD	0.206661	0.089394	0.146861	SD	0.253943	0.0727071	0.321715	0.321715	0.202094
	P value								0.101047
Dlx6	0.782347
PPIA	0.770374
Ct	0.710182
Relative Fold	0.153485
Fold Incr	0.952601
2018 #19 - Control and SP7 #59 shRNA (mission) 3d treatment BAA & BAA/TH
Cntrl shRNA	Dlx6	PPIA	∆Ct	SP7 #59	Dlx6	PPIA	∆Ct	∆∆Ct	Fold ∆
BAA/TH 1	21.2734	14.7353	6.53814	BAA/TH 1	21.7753	14.651	7.12431	0.808095	0.571136
BAA/TH 2	20.8415	14.9227	5.91879	BAA/TH 2	21.0125	14.561	6.45146	0.13524	0.910518
BAA/TH 3	21.3564	14.8647	6.49172	BAA/TH 3	21.5507	14.6452	6.90551	0.589289	0.66467
Average	21.1571	14.8409	6.31622	Average	21.4462	14.6191	6.82709	0.510875	0.715441
Median	21.2734	14.8647	6.49172	Median	21.5507	14.6452	6.90551	0.589289	0.66467
SD	0.276463	0.0959483	0.344962	SD	0.391998	0.0503355	0.343213	0.343213	0.175295
	P value								0.0876476
Dlx6	0.355511
PPIA	0.0238909
Ct	0.143143
Relative Fold	0.729465
Fold Incr	0.701797
Cntrl shRNA	Dlx6	PPIA	∆Ct	SP7 #59	Dlx6	PPIA	∆Ct	∆∆Ct	Fold ∆
BAA 1	21.8337	15.0055	6.82823	BAA 1	21.1617	14.5872	6.57447	-0.0345955	1.02427
BAA 2	21.4244	14.82	6.60439	BAA 2	21.2912	14.5518	6.73942	0.130355	0.913607
BAA 3	21.2113	14.8168	6.39456	BAA 3	21.3898	15.1466	6.24314	-0.36592	1.2887
Average	21.4898	14.8808	6.60906	Average	21.2809	14.7619	6.51901	-0.0900536	1.07553
Median	21.4244	14.82	6.60439	Median	21.2912	14.5872	6.57447	-0.0345955	1.02427
SD	0.316288	0.108009	0.216872	SD	0.114379	0.333665	0.252743	0.252743	0.19273
	P value								0.0963649
Dlx6	0.34252
PPIA	0.588681
Ct	0.663916
Relative Fold	0.0264678
Fold Incr	1.06441

## Sheet: Osx
Source Data for Figure 9D_SP7/OSX shRNA with TH, AA, or AA/TH
2018#25 - Control and SP7 #59 shRNA (mission) 3d treatment BG, BAA, TH & BAA/TH									2018-12-27	PPIA
ATDC5 cells - Hit with virus 1x, hit with puro									2018-12-27	OSX
10% FBS then switched to 5% FBS									threshold 0.04	JL
Cntrl shRNA	Osx	PPIA	∆Ct	SP7 #59	Osx	PPIA	∆Ct	∆∆Ct	Fold ∆
TH 1	20.4476	14.2748	6.17286	TH 1	21.9038	14.3208	7.58295	1.23552	0.424689
TH 2	20.7723	14.2593	6.51308	TH 2	21.5048	14.1424	7.36245	1.01503	0.494819
TH 3	21.0357	14.3986	6.6371	TH 3	21.2009	14.1804	7.02047	0.673039	0.627184
TH 4	20.3531	14.2865	6.06666	TH 4	21.683	14.1578	7.52525	1.17782	0.442018
Average	20.6522	14.3048	6.34743	Average	21.5731	14.2003	7.37278	1.02535	0.497178
Median	20.61	14.2806	6.34297	Median	21.5939	14.1691	7.44385	1.09643	0.468418
SD	0.312407	0.0635358	0.271203	SD	0.29702	0.0818328	0.252751	0.252751	0.0916597
	P value								0.0458298
Osx	0.00524735
PPIA	0.0903862
Ct	0.0014709
Relative Fold	1.63355
Fold Incr	0.49129
Cntrl shRNA	Osx	PPIA	∆Ct	SP7 #59	Osx	PPIA	∆Ct	∆∆Ct	Fold ∆
AA/TH 1	20.3146	14.3496	5.96503	AA/TH 1	21.3531	14.3756	6.97757	1.20429	0.433984
AA/TH 2	19.8492	14.3071	5.54214	AA/TH 2	22.6472	14.4344	8.21275	2.43946	0.184353
AA/TH 3	19.8675	14.3135	5.55405	AA/TH 3	21.4076	14.3269	7.08067	1.30738	0.404054
AA/TH 4	20.4678	14.4358	6.03194	AA/TH 4	21.2785	14.3195	6.95895	1.18566	0.439623
Average	20.1248	14.3515	5.77329	Average	21.6716	14.3641	7.30748	1.5342	0.365503
Median	20.0911	14.3315	5.75954	Median	21.3804	14.3512	7.02912	1.25583	0.419019
SD	0.314002	0.0592547	0.26151	SD	0.652543	0.0530727	0.605879	0.605879	0.121772
	P value								0.0608859
Osx	0.00525157
PPIA	0.761963
Ct	0.00350465
Relative Fold	4.57992
Fold Incr	0.345271
Cntrl shRNA	Osx	PPIA	∆Ct	SP7 #59	Osx	PPIA	∆Ct	∆∆Ct	Fold ∆
AA 1	20.3361	14.2869	6.04917	AA 1	21.6085	14.2915	7.31705	1.30056	0.405968
AA 2	20.2104	14.2801	5.93026	AA 2	21.8163	14.2872	7.52917	1.51268	0.350459
AA 3	20.4526	14.3737	6.07895	AA 3	21.8322	14.3188	7.5134	1.49691	0.354311
AA 4	20.3465	14.3389	6.00758	AA 4	21.7148	14.3192	7.3956	1.37911	0.384455
Average	20.3364	14.3199	6.01649	Average	21.743	14.3042	7.43881	1.42232	0.373798
Median	20.3413	14.3129	6.02837	Median	21.7656	14.3051	7.4545	1.43801	0.369383
SD	0.0991468	0.0444454	0.0645099	SD	0.103624	0.0172204	0.100701	0.100701	0.0262868
	P value								0.0131434
Osx	1.13794e-06
PPIA	0.532892
Ct	3.62512e-07
Relative Fold	2.31958
Fold Incr	0.373113

## Sheet: Col1a1
Source Data for Figure 9D_SP7/OSX shRNA with TH, AA, or AA/TH
2018#25 - Control and SP7 #59 shRNA (mission) 3d treatment BG, BAA, TH & BAA/TH									2021-04-21	PPIA
ATDC5 cells - Hit with virus 1x, hit with puro									2021-04-21	Col1a1
10% FBS then switched to 5% FBS									threshold 0.04	DL
Cntrl shRNA	Col1a1	PPIA	∆Ct	SP7 #59	Col1a1	PPIA	∆Ct	∆∆Ct	Fold ∆
TH 1	26.3903	14.6829	11.7073	TH 1
TH 2	26.6719	14.4985	12.1734	TH 2	26.4936	14.5593	11.9343	0.266144	0.831539
TH 3	26.2748	14.7008	11.5741	TH 3	26.3867	14.4911	11.8955	0.227328	0.854216
TH 4	26.1219	14.9039	11.218	TH 4	26.5006	14.414	12.0866	0.41839	0.748259
Average	26.3647	14.6965	11.6682	Average	26.4603	14.4882	11.9721	0.303954	0.811338
Median	26.3325	14.6919	11.6407	Median	26.4936	14.4911	11.9343	0.266144	0.831539
SD	0.23245	0.16574	0.395114	SD	0.0638638	0.0727071	0.100987	0.100987	0.055792
	P value								0.027896
Col1a1	0.527821
PPIA	0.10184
Ct	0.259027
Relative Fold	0.163977
Fold Incr	0.810029
2018 #19 - Control and SP7 #59 shRNA (mission) 3d treatment BAA & BAA/TH
Cntrl shRNA	Col1a1	PPIA	∆Ct	RUNX2 #90	Col1a1	PPIA	∆Ct	∆∆Ct	Fold ∆
BAA/TH 1	14.0094	14.7353	-0.725903	BAA/TH 1	14.134	14.6532	-0.519217	0.262864	0.833432
BAA/TH 2	14.1454	14.9227	-0.777269	BAA/TH 2	14.168	14.7429	-0.574944	0.207138	0.866254
BAA/TH 3	14.0216	14.8647	-0.843074	BAA/TH 3	14.1684	14.6089	-0.440467	0.341615	0.789157
Average	14.0588	14.8409	-0.782082	Average	14.1568	14.6683	-0.511543	0.270539	0.829614
Median	14.0216	14.8647	-0.777269	Median	14.168	14.6532	-0.519217	0.262864	0.833432
SD	0.0752656	0.0959483	0.0587337	SD	0.0197517	0.0682885	0.067566	0.067566	0.0386897
	P value								0.0193448
Col1a1	0.0945696
PPIA	0.0641585
Ct	0.00636573
Relative Fold	0.114315
Fold Incr	0.82901
Cntrl shRNA	Col1a1	PPIA	∆Ct	RUNX2 #90	Col1a1	PPIA	∆Ct	∆∆Ct	Fold ∆
BAA 1	14.069	15.0055	-0.936433	BAA 1	14.0185	14.5907	-0.572181	0.228028	0.853801
BAA 2	14.045	14.82	-0.775057	BAA 2	14.0851	14.6444	-0.559352	0.240856	0.846243
BAA 3	14.1276	14.8168	-0.689136	BAA 3	14.2163	14.5649	-0.348586	0.451622	0.73122
Average	14.0805	14.8808	-0.800208	Average	14.1066	14.6	-0.493373	0.306835	0.810421
Median	14.069	14.82	-0.775057	Median	14.0851	14.5907	-0.559352	0.240856	0.846243
SD	0.042524	0.108009	0.125553	SD	0.100637	0.0405868	0.125553	0.125553	0.0686944
	P value								0.0343472
Col1a1	0.700273
PPIA	0.0135401
Ct	0.0402138
Relative Fold	0.18696
Fold Incr	0.808413

## Sheet: Col2a1
Source Data for Figure 9D_SP7/OSX shRNA with TH, AA, or AA/TH
2018#25 - Control and SP7 #59 shRNA (mission) 3d treatment BG, BAA, TH & BAA/TH									2020-04-08	PPIA	2021-04-21
ATDC5 cells - Hit with virus 1x, hit with puro									2020-04-08	Col2a1	2021-04-21
10% FBS then switched to 5% FBS									threshold 0.04	JL	DL
** New RT on AA group done on 4/6/2020
Cntrl shRNA	Col2a1	PPIA	∆Ct	SP7 #59	Col2a1	PPIA	∆Ct	∆∆Ct	Fold ∆
TH 1	20.1943	14.4528	5.74151	TH 1
TH 2	20.1865	14.4137	5.77278	TH 2	20.0126	14.5593	5.45331	-0.346939	1.27186
TH 3	20.4156	14.6049	5.8107	TH 3	19.4004	14.4911	4.90925	-0.890999	1.85446
TH 4	20.4355	14.5595	5.876	TH 4	19.6086	14.414	5.19463	-0.605621	1.52163
Average	20.308	14.5077	5.80025	Average	19.6739	14.4882	5.18573	-0.61452	1.54932
Median	20.305	14.5062	5.79174	Median	19.6086	14.4911	5.19463	-0.605621	1.52163
SD	0.13603	0.089394	0.0578845	SD	0.31129	0.0727071	0.272139	0.272139	0.292285
	P value								0.146143
Col1	0.0137418
PPIA	0.770374
Ct	0.00626128
Relative Fold	0.117225
Fold Incr	1.53105
Cntrl shRNA	Col2a1	PPIA	∆Ct	SP7 #59	Col2a1	PPIA	∆Ct	∆∆Ct	Fold ∆
AA/TH 1	18.5745	14.8346	3.73997	AA/TH 1	17.9067	14.6987	3.20799	-0.47279	1.38779
AA/TH 2	18.3527	14.8271	3.52567	AA/TH 2
AA/TH 3	18.6257	14.8095	3.81622	AA/TH 3	17.8754	14.6779	3.19741	-0.483373	1.39801
AA/TH 4	18.43	14.7887	3.64126	AA/TH 4	18.0171	14.637	3.38002	-0.300755	1.23179
Average	18.4957	14.815	3.68078	Average	17.933	14.6712	3.26181	-0.418973	1.3392
Median	18.5023	14.8183	3.69062	Median	17.9067	14.6779	3.20799	-0.47279	1.38779
SD	0.126331	0.0204013	0.125791	SD	0.0744355	0.0313731	0.102516	0.102516	0.0931576
	P value								0.0465788
Col2a1	0.00105806
PPIA	0.000700594
Ct	0.00539929
Relative Fold	0.100145
Fold Incr	1.33698
Cntrl shRNA	Col2a1	PPIA	∆Ct	SP7 #59	Col2a1	PPIA	∆Ct	∆∆Ct	Fold ∆
AA 1	18.6166	14.7795	3.83704	AA 1	18.4635	14.7335	3.72999	-0.0777817	1.05539
AA 2	18.484	14.7666	3.71736	AA 2	18.4188	14.6873	3.73154	-0.0762291	1.05426
AA 3	18.6871	14.8031	3.88399	AA 3	18.5648	14.7274	3.83743	0.0296535	0.979656
AA 4	18.5224	14.7297	3.79271	AA 4	18.3611	14.7322	3.62885	-0.178926	1.13204
Average	18.5775	14.7697	3.80777	Average	18.4521	14.7201	3.73195	-0.0758209	1.05534
Median	18.5695	14.7731	3.81487	Median	18.4412	14.7298	3.73077	-0.0770054	1.05483
SD	0.0918755	0.0306923	0.07087	SD	0.086087	0.0220462	0.0851658	0.0851658	0.0622157
	P value								0.0311079
Col2a1	0.0933429
PPIA	0.0392188
Ct	0.220136
Relative Fold	8.73263e-05
Fold Incr	1.05396

## Sheet: Col10a1
Source Data for Figure 9D_SP7/OSX shRNA with TH, AA, or AA/TH
2018#25 - Control and SP7 #59 shRNA (mission) 3d treatment BG, BAA, TH & BAA/TH									2021-04-21	PPIA
ATDC5 cells - Hit with virus 1x, hit with puro									2021-04-27	Col10a1
10% FBS then switched to 5% FBS									threshold 0.04	DL
Cntrl shRNA	Col10a1	PPIA	∆Ct	SP7 #59	Col10a1	PPIA	∆Ct	∆∆Ct	Fold ∆
TH 1	26.4984	14.4528	12.0455	TH 1
TH 2	26.3667	14.4137	11.953	TH 2	27.5431	14.5593	12.9838	0.743981	0.59709
TH 3	27.0389	14.6049	12.434	TH 3	27.7281	14.4911	13.2369	0.997164	0.500984
TH 4	27.1657	14.5595	12.6062	TH 4	27.4088	14.414	12.9949	0.755081	0.592513
Average	26.7674	14.5077	12.2597	Average	27.56	14.4882	13.0719	0.832075	0.563529
Median	26.7686	14.5062	12.2398	Median	27.5431	14.4911	12.9949	0.755081	0.592513
SD	0.393842	0.089394	0.311136	SD	0.160287	0.0727071	0.143079	0.143079	0.0542139
	P value								0.027107
Col10a1	0.023254
PPIA	0.770374
Ct	0.00907921
Relative Fold	0.950926
Fold Incr	0.561721
2018 #19 - Control and SP7 #59 shRNA (mission) 3d treatment BAA & BAA/TH
Cntrl shRNA	Col10a1	PPIA	∆Ct	SP7 #59	Col10a1	PPIA	∆Ct	∆∆Ct	Fold ∆
BAA/TH 1	21.5039	14.7353	6.76859	BAA/TH 1	23.6077	14.651	8.95671	2.15879	0.223944
BAA/TH 2	21.5608	14.9227	6.6381	BAA/TH 2	22.8179	14.561	8.25686	1.45894	0.36376
BAA/TH 3	21.8517	14.8647	6.98705	BAA/TH 3	22.7232	14.6452	8.07808	1.28017	0.411748
Average	21.6388	14.8409	6.79792	Average	23.0496	14.6191	8.43055	1.63263	0.33315
Median	21.5608	14.8647	6.76859	Median	22.8179	14.6452	8.25686	1.45894	0.36376
SD	0.186592	0.0959483	0.176313	SD	0.485638	0.0503355	0.464351	0.464351	0.0975719
	P value								0.048786
Col10a1	0.00932902
PPIA	0.0238909
Ct	0.00470203
Relative Fold	4.39734
Fold Incr	0.322499
Cntrl shRNA	Col10a1	PPIA	∆Ct	SP7 #59	Col10a1	PPIA	∆Ct	∆∆Ct	Fold ∆
BAA 1	21.9365	15.0055	6.93107	BAA 1	24.1923	14.5872	9.60504	2.75393	0.148246
BAA 2	21.7371	14.82	6.9171	BAA 2	24.6961	14.5518	10.1444	3.29326	0.102007
BAA 3	21.5219	14.8168	6.70515	BAA 3	24.0001	15.1466	8.85346	2.00236	0.249592
Average	21.7319	14.8808	6.85111	Average	24.2962	14.7619	9.53429	2.68318	0.166615
Median	21.7371	14.82	6.9171	Median	24.1923	14.5872	9.60504	2.75393	0.148246
SD	0.207347	0.108009	0.126592	SD	0.359479	0.333665	0.648355	0.648355	0.0754879
	P value								0.0377439
Col10a1	0.000431842
PPIA	0.588681
Ct	0.00215135
Relative Fold	11.0991
Fold Incr	0.155697

## Sheet: Bglap2
Source Data for Figure 9D_SP7/OSX shRNA with TH, AA, or AA/TH
2018#25 - Control and SP7 #59 shRNA (mission) 3d treatment BG, BAA, TH & BAA/TH									2020-04-08	PPIA	2021-04-21
ATDC5 cells - Hit with virus 1x, hit with puro									2020-04-08	Bglap2	2021-04-21
10% FBS then switched to 5% FBS									threshold 0.04	JL	DL
** New RT on AA group done on 4/6/2020
Cntrl shRNA	Bglap2	PPIA	∆Ct	SP7 #59	Bglap2	PPIA	∆Ct	∆∆Ct	Fold ∆
TH 1	28.1857	14.4528	13.7329	TH 1
TH 2	27.7401	14.4137	13.3264	TH 2	25.1959	14.5593	10.6366	-2.83624	7.14155
TH 3	28.5538	14.6049	13.9489	TH 3	25.219	14.4911	10.7278	-2.74499	6.70384
TH 4	27.4426	14.5595	12.8831	TH 4	24.8153	14.414	10.4013	-3.0715	8.40649
Average	27.9805	14.5077	13.4728	Average	25.0767	14.4882	10.5886	-2.88424	7.41729
Median	27.9629	14.5062	13.5296	Median	25.1959	14.4911	10.6366	-2.83624	7.14155
SD	0.489198	0.089394	0.470289	SD	0.226688	0.0727071	0.168468	0.168468	0.884184
	P value								0.442092
Bglap2	0.000231675
PPIA	0.770374
Ct	0.000175134
Relative Fold	7.37543
Fold Incr	7.38318
Cntrl shRNA	Bglap2	PPIA	∆Ct	SP7 #59	Bglap2	PPIA	∆Ct	∆∆Ct	Fold ∆
AA/TH 1	27.4941	14.8346	12.6595	AA/TH 1	23.7647	14.6987	9.06605	-3.23819	9.43609
AA/TH 2	27.1705	14.8271	12.3434	AA/TH 2
AA/TH 3	27.0854	14.8095	12.276	AA/TH 3	24.0098	14.6779	9.33184	-2.9724	7.84839
AA/TH 4	26.7268	14.7887	11.9381	AA/TH 4	23.9014	14.637	9.26433	-3.03991	8.22437
Average	27.1192	14.815	12.3042	Average	23.892	14.6712	9.22074	-3.0835	8.50295
Median	27.1279	14.8183	12.3097	Median	23.9014	14.6779	9.26433	-3.03991	8.22437
SD	0.315302	0.0204013	0.295863	SD	0.122798	0.0313731	0.138155	0.138155	0.829704
	P value								0.414852
Bglap2	1.49822e-05
PPIA	0.000700594
Ct	1.51024e-05
Relative Fold	8.67504
Fold Incr	8.47667
Cntrl shRNA	Bglap2	PPIA	∆Ct	SP7 #59	Bglap2	PPIA	∆Ct	∆∆Ct	Fold ∆
AA 1	29.8956	14.7795	15.1161	AA 1	27.2223	14.7335	12.4888	-1.84286	3.58719
AA 2	28.8941	14.7666	14.1274	AA 2	27.5116	14.6873	12.8244	-1.5073	2.84277
AA 3				AA 3	26.6856	14.7274	11.9582	-2.37351	5.18201
AA 4	28.4812	14.7297	13.7515	AA 4	27.1772	14.7322	12.445	-1.88668	3.69784
Average	29.0903	14.7586	14.3317	Average	27.1492	14.7201	12.4291	-1.90259	3.82745
Median	28.8941	14.7666	14.1274	Median	27.1998	14.7298	12.4669	-1.86477	3.64252
SD	0.727346	0.0258847	0.70484	SD	0.342765	0.0220462	0.356765	0.356765	0.979615
	P value								0.489808
Bglap2	0.0049487
PPIA	0.0862641
Ct	0.00510669
Relative Fold	2.38956
Fold Incr	3.73883

[truncated: 7 more sheets: Ibsp, Mgp, Spp1, Dmp1, Mmp9, Mmp13, Alpl]
