# Supplementary material for: Differences in pathways contributing to thyroid hormone effects on postnatal cartilage calcification versus secondary ossification center development
Source: eLife. 2022 Jan 31;11:e76730. doi: 10.7554/eLife.76730 (PMC8830887; doi:10.7554/eLife.76730)
Supplement: Figure 9—source data 4. — Reverse transcriptase quantitative polymerase chain reaction (RT-qPCR) data for DLX3 shRNA. Average fold changes plotted and t-test values are highlighted in yellow. [file elife-76730-fig9-data4.xlsx]

## Sheet: Sox9
Soure Data for Figure 9E_DLX3 shRNA with TH, AA, or AA/TH
2021 #10 ATDC5 DLX3 #32 shRNA							PPIA	2021-04-05	GG
No serum Free, RNA extracted at 3d							Sox9	2021-04-07	GG
RNA Extractions done by DL
Nano, dilutions and RT done by DL
Used 1ug RNA for RT
Cntrl shRNA	Sox9	PPIA	∆Ct	DLX3 (#32)	Sox9	PPIA	∆Ct	∆∆Ct	Fold ∆
TH 1	18.813	14.699	4.114	TH 1	19.225	14.766	4.459	0.45525	0.729384
TH 2	18.575	14.598	3.977	TH 2	18.939	14.717	4.222	0.21825	0.859608
TH 3	18.58	14.689	3.891	TH 3	18.972	14.695	4.277	0.27325	0.827453
TH 4	18.694	14.661	4.033	TH 4	18.929	14.687	4.242	0.23825	0.847773
Average	18.6655	14.6618	4.00375	Average	19.0162	14.7162	4.3	0.29625	0.816054
Median	18.637	14.675	4.005	Median	18.9555	14.706	4.2595	0.25575	0.837613
SD	0.112648	0.0454414	0.0938771	SD	0.140374	0.0355094	0.10841	0.10841	0.0592865
	P value								0.0296433
Sox9	0.00800661
PPIA	0.107643
Ct	0.00613603
Relative Fold	0.163749
Fold Incr	0.814366
2018#19 - Control and DLX3 #32 shRNA (mission) 3d treatment BAA & BAA/TH
Cntrl shRNA	Sox9	PPIA	∆Ct	DLX3 #32	Sox9	PPIA	∆Ct	∆∆Ct	Fold ∆
BAA/TH 1	18.8144	14.7353	4.07912	BAA/TH 1	19.5863	14.5297	5.05653	0.883168	0.542176
BAA/TH 2	19.563	14.9227	4.64036	BAA/TH 2	19.36	14.3396	5.02046	0.847102	0.5559
BAA/TH 3	18.6653	14.8647	3.80059	BAA/TH 3	19.8207	14.7075	5.11318	0.939818	0.521299
Average	19.0142	14.8409	4.17336	Average	19.589	14.5256	5.06339	0.890029	0.539792
Median	18.8144	14.8647	4.07912	Median	19.5863	14.5297	5.05653	0.883168	0.542176
SD	0.481098	0.0959483	0.427743	SD	0.230332	0.183997	0.0467374	0.0467374	0.0174236
	P value								0.00871181
Sox9	0.1354
PPIA	0.0580933
Ct	0.0231128
Relative Fold	0.877532
Fold Incr	0.539603
Cntrl shRNA	Sox9	PPIA	∆Ct	DLX3 #32	Sox9	PPIA	∆Ct	∆∆Ct	Fold ∆
BAA 1	18.915	15.0055	3.9095	BAA 1	18.0061	14.4562	3.54983	-0.483033	1.39768
BAA 2	18.6115	14.82	3.79152	BAA 2	18.4176	14.4566	3.96098	-0.0718826	1.05109
BAA 3	19.2144	14.8168	4.39757	BAA 3	18.1534	14.4873	3.6661	-0.36677	1.28946
Average	18.9136	14.8808	4.03287	Average	18.1923	14.4667	3.72564	-0.307228	1.24608
Median	18.915	14.82	3.9095	Median	18.1534	14.4566	3.6661	-0.36677	1.28946
SD	0.301403	0.108009	0.321308	SD	0.2085	0.0178173	0.211943	0.211943	0.177322
	P value								0.0886611
Sox9	0.0270577
PPIA	0.002807
Ct	0.239
Relative Fold	0.00907924
Fold Incr	1.23733

## Sheet: Runx2
Soure Data for Figure 9E_DLX3 shRNA with TH, AA, or AA/TH
2021 #10 ATDC5 DLX3 #32 shRNA							PPIA	2021-04-05	GG
No serum Free, RNA extracted at 3d							Runx2	2021-04-07	GG
RNA Extractions done by DL
Nano, dilutions and RT done by DL
Used 1ug RNA for RT
Cntrl shRNA	Runx2	PPIA	∆Ct	DLX3 (#32)	Runx2	PPIA	∆Ct	∆∆Ct	Fold ∆
TH 1	19.264	14.699	4.565	TH 1	18.803	14.766	4.037	-0.13025	1.09448
TH 2	18.69	14.598	4.092	TH 2	18.718	14.717	4.001	-0.16625	1.12214
TH 3	18.671	14.689	3.982	TH 3	18.906	14.695	4.211	0.04375	0.97013
TH 4	18.691	14.661	4.03	TH 4	18.872	14.687	4.185	0.01775	0.987772
Average	18.829	14.6618	4.16725	Average	18.8248	14.7162	4.1085	-0.05875	1.04363
Median	18.6905	14.675	4.061	Median	18.8375	14.706	4.111	-0.05625	1.04113
SD	0.290146	0.0454414	0.268963	SD	0.0830718	0.0355094	0.104924	0.104924	0.0758769
	P value								0.0379385
Runx2	0.978445
PPIA	0.107643
Ct	0.698135
Relative Fold	0.00213202
Fold Incr	1.04156
2018#19 - Control and DLX3 #32 shRNA (mission) 3d treatment BAA & BAA/TH
Cntrl shRNA	Runx2	PPIA	∆Ct	DLX3 #32	Runx2	PPIA	∆Ct	∆∆Ct	Fold ∆
BAA/TH 1	17.5747	14.7353	2.83947	BAA/TH 1	17.6835	14.5297	3.15377	-0.10391	1.07468
BAA/TH 2	18.3836	14.9227	3.46089	BAA/TH 2	17.6546	14.3396	3.31504	0.0573616	0.96102
BAA/TH 3	18.3374	14.8647	3.47268	BAA/TH 3	18.436	14.7075	3.72848	0.4708	0.721564
Average	18.0986	14.8409	3.25768	Average	17.9247	14.5256	3.3991	0.141417	0.919089
Median	18.3374	14.8647	3.46089	Median	17.6835	14.5297	3.31504	0.0573616	0.96102
SD	0.454225	0.0959483	0.362226	SD	0.443019	0.183997	0.296432	0.296432	0.180255
	P value								0.0901274
Runx2	0.659825
PPIA	0.0580933
Ct	0.628408
Relative Fold	0.191712
Fold Incr	0.906628
Cntrl shRNA	Runx2	PPIA	∆Ct	DLX3 #32	Runx2	PPIA	∆Ct	∆∆Ct	Fold ∆
BAA 1	18.5097	15.0055	3.50424	BAA 1	17.6294	14.4562	3.17318	0.00742054	0.99487
BAA 2	17.9246	14.82	3.10462	BAA 2	17.603	14.4566	3.1464	-0.0193586	1.01351
BAA 3	17.7052	14.8168	2.88843	BAA 3	17.6439	14.4873	3.15664	-0.00912762	1.00635
Average	18.0465	14.8808	3.16576	Average	17.6254	14.4667	3.15874	-0.0070219	1.00491
Median	17.9246	14.82	3.10462	Median	17.6294	14.4566	3.15664	-0.00912762	1.00635
SD	0.415858	0.108009	0.312422	SD	0.0207457	0.0178173	0.0135132	0.0135132	0.00940245
	P value								0.00470123
Runx2	0.154729
PPIA	0.002807
Ct	0.97084
Relative Fold	4.21369e-05
Fold Incr	1.00488

## Sheet: Dlx3
Soure Data for Figure 9E_DLX3 shRNA with TH, AA, or AA/TH
2021 #10 ATDC5 Dlx3 #32 shRNA							PPIA	2021-04-05	GG
No serum Free, RNA extracted at 3d							Dlx3	2021-04-06	DL
RNA Extractions done by DL
Nano, dilutions and RT done by DL
Used 1ug RNA for RT
Cntrl shRNA	Dlx3	PPIA	∆Ct	Dlx3 (#32)	Dlx3	PPIA	∆Ct	∆∆Ct	Fold ∆
TH 1	30.211	14.699	15.512	TH 1	30.297	14.766	15.531	0.1535	0.899067
TH 2	30.597	14.598	15.999	TH 2	29.728	14.717	15.011	-0.3665	1.28922
TH 3	29.212	14.689	14.523	TH 3
TH 4	30.137	14.661	15.476	TH 4	30.763	14.687	16.076	0.6985	0.616213
Average	30.0392	14.6618	15.3775	Average	30.2627	14.7233	15.5393	0.161833	0.934834
Median	30.174	14.675	15.494	Median	30.297	14.717	15.531	0.1535	0.899067
SD	0.58722	0.0454414	0.617583	SD	0.518353	0.039879	0.532549	0.532549	0.337927
	P value								0.168964
Dlx3	0.624145
PPIA	0.121648
Ct	0.732028
Relative Fold	0.482167
Fold Incr	0.893888
2018#19 - Control and Dlx3 #32 shRNA (mission) 3d treatment BAA & BAA/TH
Cntrl shRNA	Dlx3	PPIA	∆Ct	Dlx3	Dlx3	PPIA	∆Ct	∆∆Ct	Fold ∆
BAA/TH 1	29.3778	14.7353	14.6425	BAA/TH 1	31.3474	14.5297	16.8177	3.16497	0.111494
BAA/TH 2	27.2645	14.9227	12.3418	BAA/TH 2	32.6159	14.3396	18.2763	4.62358	0.040566
BAA/TH 3	28.8386	14.8647	13.9739	BAA/TH 3	33.1743	14.7075	18.4668	4.81405	0.0355489
Average	28.4936	14.8409	13.6527	Average	32.3792	14.5256	17.8536	4.20087	0.0625362
Median	28.8386	14.8647	13.9739	Median	32.6159	14.5297	18.2763	4.62358	0.040566
SD	1.09806	0.0959483	1.1835	SD	0.936146	0.183997	0.902158	0.902158	0.0424726
	P value								0.0212363
Dlx3	0.00956042
PPIA	0.0580933
Ct	0.00810548
Relative Fold	26.0409
Fold Incr	0.0543767
Cntrl shRNA	Dlx3	PPIA	∆Ct	Dlx3 #32	Dlx3	PPIA	∆Ct	∆∆Ct	Fold ∆
BAA 1	30.6328	15.0055	15.6273	BAA 1	30.6535	14.4562	16.1972	1.03462	0.488143
BAA 2	30.1742	14.82	15.3542	BAA 2	30.9591	14.4566	16.5025	1.33993	0.395039
BAA 3	29.323	14.8168	14.5062	BAA 3	30.8572	14.4873	16.3699	1.20734	0.433065
Average	30.0434	14.8808	15.1626	Average	30.8233	14.4667	16.3566	1.19397	0.438749
Median	30.1742	14.82	15.3542	Median	30.8572	14.4566	16.3699	1.20734	0.433065
SD	0.664626	0.108009	0.584595	SD	0.155633	0.0178173	0.153094	0.153094	0.0468119
	P value								0.0234059
Dlx3	0.118941
PPIA	0.002807
Ct	0.0267283
Relative Fold	1.81457
Fold Incr	0.437099

## Sheet: Dlx5
Soure Data for Figure 9E_DLX3 shRNA with TH, AA, or AA/TH
2021 #10 ATDC5 DLX3 #32 shRNA							PPIA	2021-04-05	GG
No serum Free, RNA extracted at 3d							Dlx5	2021-04-07	GG
RNA Extractions done by DL
Nano, dilutions and RT done by DL
Used 1ug RNA for RT
Cntrl shRNA	Dlx5	PPIA	∆Ct	DLX3 (#32)	Dlx5	PPIA	∆Ct	∆∆Ct	Fold ∆
TH 1	20.909	14.699	6.21	TH 1	20.472	14.766	5.706	-0.2775	1.21209
TH 2	20.608	14.598	6.01	TH 2	20.397	14.717	5.68	-0.3035	1.23413
TH 3	20.494	14.689	5.805	TH 3	20.462	14.695	5.767	-0.2165	1.16191
TH 4	20.57	14.661	5.909	TH 4	20.558	14.687	5.871	-0.1125	1.0811
Average	20.6452	14.6618	5.9835	Average	20.4723	14.7162	5.756	-0.2275	1.17231
Median	20.589	14.675	5.9595	Median	20.467	14.706	5.7365	-0.247	1.187
SD	0.182109	0.0454414	0.172643	SD	0.0661331	0.0355094	0.084896	0.084896	0.0679028
	P value								0.0339514
Dlx5	0.124365
PPIA	0.107643
Ct	0.0558997
Relative Fold	0.0203359
Fold Incr	1.1708
2018#19 - Control and DLX3 #32 shRNA (mission) 3d treatment BAA & BAA/TH
Cntrl shRNA	Dlx5	PPIA	∆Ct	DLX3 #32	Dlx5	PPIA	∆Ct	∆∆Ct	Fold ∆
BAA/TH 1	19.6168	14.7353	4.88154	BAA/TH 1	19.3222	14.5297	4.79244	-0.101357	1.07278
BAA/TH 2	19.8287	14.9227	4.90605	BAA/TH 2	19.1683	14.3396	4.82874	-0.0650563	1.04613
BAA/TH 3				BAA/TH 3	19.5813	14.7075	4.87375	-0.0200467	1.01399
Average	19.7228	14.829	4.8938	Average	19.3572	14.5256	4.83164	-0.0621533	1.0443
Median	19.7228	14.829	4.8938	Median	19.3222	14.5297	4.82874	-0.0650563	1.04613
SD	0.149858	0.132524	0.0173342	SD	0.208689	0.183997	0.0407328	0.0407328	0.0294374
	P value								0.0147187
Dlx5	0.127133
PPIA	0.143282
Ct	0.144803
Relative Fold	0.00045884
Fold Incr	1.04402
Cntrl shRNA	Dlx5	PPIA	∆Ct	DLX3 #32	Dlx5	PPIA	∆Ct	∆∆Ct	Fold ∆
BAA 1	20.1534	15.0055	5.14798	BAA 1	18.7501	14.4562	4.29384	-0.681273	1.60355
BAA 2	19.7452	14.82	4.92516	BAA 2	19.28	14.4566	4.82342	-0.151687	1.11087
BAA 3	19.669	14.8168	4.85219	BAA 3	19.2437	14.4873	4.75641	-0.218699	1.16368
Average	19.8559	14.8808	4.97511	Average	19.0913	14.4667	4.62456	-0.350553	1.2927
Median	19.7452	14.82	4.92516	Median	19.2437	14.4566	4.75641	-0.218699	1.16368
SD	0.260512	0.108009	0.154095	SD	0.29603	0.0178173	0.288365	0.288365	0.270498
	P value								0.135249
Dlx5	0.0283473
PPIA	0.002807
Ct	0.136865
Relative Fold	0.00386732
Fold Incr	1.27505

## Sheet: Dlx6
Soure Data for Figure 9E_DLX3 shRNA with TH, AA, or AA/TH
2021 #10 ATDC5 DLX3 #32 shRNA							PPIA	2021-04-05	GG
No serum Free, RNA extracted at 3d							Dlx6	2021-04-07	GG
RNA Extractions done by DL
Nano, dilutions and RT done by DL
Used 1ug RNA for RT
Cntrl shRNA	Dlx6	PPIA	∆Ct	DLX3 (#32)	Dlx6	PPIA	∆Ct	∆∆Ct	Fold ∆
TH 1	21.513	14.699	6.814	TH 1	21.258	14.766	6.492	-0.20375	1.15169
TH 2	21.181	14.598	6.583	TH 2	20.947	14.717	6.23	-0.46575	1.38104
TH 3	21.406	14.689	6.717	TH 3	21.245	14.695	6.55	-0.14575	1.10631
TH 4	21.33	14.661	6.669	TH 4	21.247	14.687	6.56	-0.13575	1.09866
Average	21.3575	14.6618	6.69575	Average	21.1743	14.7162	6.458	-0.23775	1.18442
Median	21.368	14.675	6.693	Median	21.246	14.706	6.521	-0.17475	1.129
SD	0.139572	0.0454414	0.0963721	SD	0.151608	0.0355094	0.154928	0.154928	0.133148
	P value								0.0665738
Dlx6	0.125635
PPIA	0.107643
Ct	0.0403305
Relative Fold	0.00685949
Fold Incr	1.17915
2018#19 - Control and DLX3 #32 shRNA (mission) 3d treatment BAA & BAA/TH
Cntrl shRNA	Dlx6	PPIA	∆Ct	DLX3 #32	Dlx6	PPIA	∆Ct	∆∆Ct	Fold ∆
BAA/TH 1	21.2734	14.7353	6.53814	BAA/TH 1	20.4923	14.5297	5.96254	-0.353679	1.27782
BAA/TH 2	20.8415	14.9227	5.91879	BAA/TH 2	20.8751	14.3396	6.53557	0.219348	0.858954
BAA/TH 3	21.3564	14.8647	6.49172	BAA/TH 3	21.3181	14.7075	6.61062	0.294402	0.81541
Average	21.1571	14.8409	6.31622	Average	20.8952	14.5256	6.36958	0.0533568	0.98406
Median	21.2734	14.8647	6.49172	Median	20.8751	14.5297	6.53557	0.219348	0.858954
SD	0.276463	0.0959483	0.344962	SD	0.413291	0.183997	0.354495	0.354495	0.255329
	P value								0.127665
Dlx6	0.413195
PPIA	0.0580933
Ct	0.860882
Relative Fold	0.166343
Fold Incr	0.963691
Cntrl shRNA	Dlx6	PPIA	∆Ct	DLX3 #32	Dlx6	PPIA	∆Ct	∆∆Ct	Fold ∆
BAA 1	21.8337	15.0055	6.82823	BAA 1	20.5253	14.4562	6.06902	-0.540038	1.45401
BAA 2	21.4244	14.82	6.60439	BAA 2	20.9345	14.4566	6.47795	-0.13111	1.09514
BAA 3	21.2113	14.8168	6.39456	BAA 3	20.7312	14.4873	6.2439	-0.365163	1.28803
Average	21.4898	14.8808	6.60906	Average	20.7303	14.4667	6.26362	-0.345437	1.27906
Median	21.4244	14.82	6.60439	Median	20.7312	14.4566	6.2439	-0.365163	1.28803
SD	0.316288	0.108009	0.216872	SD	0.204641	0.0178173	0.205176	0.205176	0.179605
	P value								0.0898027
Dlx6	0.0250789
PPIA	0.002807
Ct	0.115577
Relative Fold	0.0196731
Fold Incr	1.27054

## Sheet: Sp7
Soure Data for Figure 9E_DLX3 shRNA with TH, AA, or AA/TH
2021 #10 ATDC5 DLX3 #32 shRNA							PPIA	2021-04-05	GG
No serum Free, RNA extracted at 3d							Sp7	2021-04-07	GG
RNA Extractions done by DL
Nano, dilutions and RT done by DL
Used 1ug RNA for RT
Cntrl shRNA	Sp7	PPIA	∆Ct	DLX3 (#32)	Sp7	PPIA	∆Ct	∆∆Ct	Fold ∆
TH 1	21.436	14.699	6.737	TH 1	21.16	14.766	6.394	-0.468	1.38319
TH 2	21.517	14.598	6.919	TH 2	20.917	14.717	6.2	-0.662	1.58227
TH 3	21.637	14.689	6.948	TH 3	21.201	14.695	6.506	-0.356	1.27987
TH 4	21.505	14.661	6.844	TH 4	21.147	14.687	6.46	-0.402	1.32134
Average	21.5237	14.6618	6.862	Average	21.1062	14.7162	6.39	-0.472	1.39167
Median	21.511	14.675	6.8815	Median	21.1535	14.706	6.427	-0.435	1.35226
SD	0.083512	0.0454414	0.0941524	SD	0.128248	0.0355094	0.134749	0.134749	0.133974
	P value								0.0669871
Sp7	0.00157845
PPIA	0.107643
Ct	0.00121244
Relative Fold	0.113738
Fold Incr	1.38703
2018#19 - Control and DLX3 #32 shRNA (mission) 3d treatment BAA & BAA/TH
Cntrl shRNA	Sp7	PPIA	∆Ct	DLX3 #32	Sp7	PPIA	∆Ct	∆∆Ct	Fold ∆
BAA/TH 1	20.2488	14.7353	5.51355	BAA/TH 1	19.3473	14.5297	4.81758	-0.851482	1.80435
BAA/TH 2	20.3741	14.9227	5.45142	BAA/TH 2	19.4715	14.3396	5.1319	-0.537166	1.45112
BAA/TH 3	20.9069	14.8647	6.04222	BAA/TH 3	20.4178	14.7075	5.71027	0.041207	0.971842
Average	20.5099	14.8409	5.66906	Average	19.7455	14.5256	5.21992	-0.449147	1.4091
Median	20.3741	14.8647	5.51355	Median	19.4715	14.5297	5.1319	-0.537166	1.45112
SD	0.349434	0.0959483	0.324651	SD	0.585489	0.183997	0.452807	0.452807	0.417843
	P value								0.208922
Sp7	0.124115
PPIA	0.0580933
Ct	0.235139
Relative Fold	1.33934e-05
Fold Incr	1.36523
Cntrl shRNA	Sp7	PPIA	∆Ct	DLX3 #32	Sp7	PPIA	∆Ct	∆∆Ct	Fold ∆
BAA 1	21.2607	15.0055	6.25528	BAA 1	20.1003	14.4562	5.64406	-0.330637	1.25757
BAA 2	21.0849	14.82	6.26492	BAA 2	19.9648	14.4566	5.50817	-0.466523	1.38177
BAA 3	20.2207	14.8168	5.40389	BAA 3	20.1194	14.4873	5.6321	-0.342602	1.26804
Average	20.8555	14.8808	5.9747	Average	20.0615	14.4667	5.59478	-0.379921	1.30246
Median	21.0849	14.82	6.25528	Median	20.1003	14.4566	5.6321	-0.342602	1.26804
SD	0.556718	0.108009	0.494354	SD	0.0842967	0.0178173	0.0752377	0.0752377	0.0688865
	P value								0.0344432
Sp7	0.0710285
PPIA	0.002807
Ct	0.258537
Relative Fold	0.0928317
Fold Incr	1.30127

## Sheet: Col1a1
Soure Data for Figure 9E_DLX3 shRNA with TH, AA, or AA/TH
2021 #10 ATDC5 DLX3 #32 shRNA							PPIA	2021-04-05	GG
No serum Free, RNA extracted at 3d							Col1a1	2021-04-07	DL
RNA Extractions done by DL
Nano, dilutions and RT done by DL
Used 1ug RNA for RT
Cntrl shRNA	Col1a1	PPIA	∆Ct	DLX3 (#32)	Col1a1	PPIA	∆Ct	∆∆Ct	Fold ∆
TH 1	24.713	14.699	10.014	TH 1	25.611	14.766	10.845	0.71925	0.607413
TH 2	24.727	14.598	10.129	TH 2
TH 3	24.721	14.689	10.032	TH 3	25.74	14.695	11.045	0.91925	0.528784
TH 4	24.989	14.661	10.328	TH 4	25.525	14.687	10.838	0.71225	0.610367
Average	24.7875	14.6618	10.1258	Average	25.6253	14.716	10.9093	0.783583	0.582188
Median	24.724	14.675	10.0805	Median	25.611	14.695	10.845	0.71925	0.607413
SD	0.134456	0.0454414	0.143982	SD	0.108214	0.0434856	0.117543	0.117543	0.0462731
	P value								0.0231365
Col1a1	0.000314095
PPIA	0.172677
Ct	0.000605944
Relative Fold	0.812028
Fold Incr	0.580922
2018#19 - Control and DLX3 #32 shRNA (mission) 3d treatment BAA & BAA/TH
Cntrl shRNA	Col1a1	PPIA	∆Ct	DLX3 #32	Col1a1	PPIA	∆Ct	∆∆Ct	Fold ∆
BAA/TH 1	14.0094	14.7353	-0.725903	BAA/TH 1	14.1012	14.5297	-0.428577	0.353504	0.782681
BAA/TH 2	14.1454	14.9227	-0.777269	BAA/TH 2	13.9831	14.3396	-0.356451	0.425631	0.744513
BAA/TH 3	14.0216	14.8647	-0.843074	BAA/TH 3	14.4802	14.7075	-0.22732	0.554762	0.680769
Average	14.0588	14.8409	-0.782082	Average	14.1882	14.5256	-0.337449	0.444633	0.735988
Median	14.0216	14.8647	-0.777269	Median	14.1012	14.5297	-0.356451	0.425631	0.744513
SD	0.0752656	0.0959483	0.0587337	SD	0.259698	0.183997	0.101965	0.101965	0.0514878
	P value								0.0257439
Col1a1	0.453881
PPIA	0.0580933
Ct	0.0028174
Relative Fold	0.298769
Fold Incr	0.734771
Cntrl shRNA	Col1a1	PPIA	∆Ct	DLX3 #32	Col1a1	PPIA	∆Ct	∆∆Ct	Fold ∆
BAA 1	14.069	15.0055	-0.936433	BAA 1	14.0703	14.4562	-0.385923	0.414285	0.750391
BAA 2	14.045	14.82	-0.775057	BAA 2	14.081	14.4566	-0.375607	0.424602	0.745044
BAA 3	14.1276	14.8168	-0.689136	BAA 3	14.0847	14.4873	-0.402537	0.397671	0.759083
Average	14.0805	14.8808	-0.800208	Average	14.0787	14.4667	-0.388022	0.412186	0.751506
Median	14.069	14.82	-0.775057	Median	14.081	14.4566	-0.385923	0.414285	0.750391
SD	0.042524	0.108009	0.125553	SD	0.00748149	0.0178173	0.0135876	0.0135876	0.00708527
	P value								0.00354264
Col1a1	0.944
PPIA	0.002807
Ct	0.00482375
Relative Fold	0.181283
Fold Incr	0.751484

## Sheet: Col2a1
Soure Data for Figure 9E_DLX3 shRNA with TH, AA, or AA/TH
2021 #10 ATDC5 DLX3 #32 shRNA							PPIA	2021-04-05	GG
No serum Free, RNA extracted at 3d							Col2a1	2021-04-07	DL
RNA Extractions done by DL
Nano, dilutions and RT done by DL
Used 1ug RNA for RT
Cntrl shRNA	Col2a1	PPIA	∆Ct	DLX3 (#32)	Col2a1	PPIA	∆Ct	∆∆Ct	Fold ∆
TH 1	20.997	14.699	6.298	TH 1	22.22	14.766	7.454	0.93975	0.521323
TH 2	21.176	14.598	6.578	TH 2	21.987	14.717	7.27	0.75575	0.592238
TH 3	21.25	14.689	6.561	TH 3	22.193	14.695	7.498	0.98375	0.505664
TH 4	21.281	14.661	6.62	TH 4	22.519	14.687	7.832	1.31775	0.40116
Average	21.176	14.6618	6.51425	Average	22.2297	14.7162	7.5135	0.99925	0.505096
Median	21.213	14.675	6.5695	Median	22.2065	14.706	7.476	0.96175	0.513493
SD	0.127203	0.0454414	0.146284	SD	0.219118	0.0355094	0.234176	0.234176	0.0788672
	P value								0.0394336
Col2a1	0.000163782
PPIA	0.107643
Ct	0.000353019
Relative Fold	1.52134
Fold Incr	0.50026
2018#19 - Control and DLX3 #32 shRNA (mission) 3d treatment BAA & BAA/TH
Cntrl shRNA	Col2a1	PPIA	∆Ct	DLX3 #32	Col2a1	PPIA	∆Ct	∆∆Ct	Fold ∆
BAA/TH 1	17.176	15.0007	2.17534	BAA/TH 1	18.2188	14.9119	3.30681	1.40241	0.378296
BAA/TH 2	16.916	14.9991	1.91695	BAA/TH 2	18.4156	15.2333	3.18234	1.27794	0.412384
BAA/TH 3	16.8597	15.2388	1.62091	BAA/TH 3	17.8485	15.1804	2.6681	0.763706	0.588981
Average	16.9839	14.8409	1.9044	Average	18.161	14.5256	3.05242	1.14802	0.459887
Median	16.916	14.8647	1.91695	Median	18.2188	14.5297	3.18234	1.27794	0.412384
SD	0.168729	0.0959483	0.277429	SD	0.287974	0.183997	0.338594	0.338594	0.113091
	P value								0.0565453
Col2a1	0.003636
PPIA	0.830987
Ct	0.0104769
Relative Fold	2.21002
Fold Incr	0.451244
Cntrl shRNA	Col2a1	PPIA	∆Ct	DLX3 #32	Col2a1	PPIA	∆Ct	∆∆Ct	Fold ∆
BAA 1	16.4533	14.8094	1.64386	BAA 1	18.5199	14.6426	3.87726	2.19037	0.219096
BAA 2	16.3882	14.83	1.55818	BAA 2	18.6913	14.6629	4.02845	2.34155	0.197298
BAA 3	16.5897	14.7311	1.85864	BAA 3	18.6033	14.6745	3.92876	2.24186	0.211413
Average	16.4771	14.8808	1.6869	Average	18.6048	14.4667	3.94482	2.25793	0.209269
Median	16.4533	14.82	1.64386	Median	18.6033	14.4566	3.92876	2.24186	0.211413
SD	0.102845	0.108009	0.154783	SD	0.0857525	0.0178173	0.0768615	0.0768615	0.0110559
	P value								0.00552793
Col2a1	1.03655e-05
PPIA	0.014543
Ct	2.25829e-05
Relative Fold	5.45123
Fold Incr	0.209072

## Sheet: Col10a1
Soure Data for Figure 9E_DLX3 shRNA with TH, AA, or AA/TH
2021 #10 ATDC5 DLX3 #32 shRNA							PPIA	2021-04-05	GG
No serum Free, RNA extracted at 3d							Col10a1	2021-04-29	GG
RNA Extractions done by DL
Nano, dilutions and RT done by DL
Used 1ug RNA for RT
Cntrl shRNA	Col10a1	PPIA	∆Ct	DLX3 (#32)	Col10a1	PPIA	∆Ct	∆∆Ct	Fold ∆
TH 1	27.1319	14.699	12.4329	TH 1	26.9375	14.766	12.1715	0.230866	0.852123
TH 2	26.7652	14.598	12.1672	TH 2	27.1558	14.717	12.4388	0.498126	0.708026
TH 3	25.8928	14.689	11.2038	TH 3	27.7849	14.695	13.0899	1.14923	0.450866
TH 4	26.6196	14.661	11.9586	TH 4	27.4696	14.687	12.7826	0.841919	0.557901
Average	26.6024	14.6618	11.9406	Average	27.3369	14.7162	12.6207	0.680035	0.642229
Median	26.6924	14.675	12.0629	Median	27.3127	14.706	12.6107	0.670023	0.632963
SD	0.519852	0.0454414	0.528185	SD	0.369955	0.0355094	0.400497	0.400497	0.175229
	P value								0.0876145
Col10a1	0.0608979
PPIA	0.107643
Ct	0.0860231
Relative Fold	1.16755
Fold Incr	0.62415
2018#19 - Control and DLX3 #32 shRNA (mission) 3d treatment BAA & BAA/TH
Cntrl shRNA	Col10a1	PPIA	∆Ct	DLX3 #32	Col10a1	PPIA	∆Ct	∆∆Ct	Fold ∆
BAA/TH 1	21.5039	14.7353	6.76859	BAA/TH 1	24.2574	14.5297	9.72768	2.92976	0.131236
BAA/TH 2	21.5608	14.9227	6.6381	BAA/TH 2	24.3713	14.3396	10.0317	3.23378	0.1063
BAA/TH 3	21.8517	14.8647	6.98705	BAA/TH 3	24.3926	14.7075	9.68512	2.8872	0.135166
Average	21.8517	14.8409	6.79792	Average	24.3404	14.5256	9.81483	3.01691	0.124234
Median	21.5608	14.8647	6.76859	Median	24.3713	14.5297	9.72768	2.92976	0.131236
SD	0.186592	0.0959483	0.176313	SD	0.072691	0.183997	0.189014	0.189014	0.0156548
	P value								0.0078274
Col10a1	1.98799e-05
PPIA	0.0580933
Ct	3.53443e-05
Relative Fold	10.278
Fold Incr	0.123543
Cntrl shRNA	Col10a1	PPIA	∆Ct	DLX3 #32	Col10a1	PPIA	∆Ct	∆∆Ct	Fold ∆
BAA 1	21.9365	15.0055	6.93107	BAA 1	24.7694	14.4562	10.3132	3.46209	0.0907414
BAA 2	21.7371	14.82	6.9171	BAA 2	25.2651	14.4566	10.8085	3.95741	0.0643726
BAA 3	21.5219	14.8168	6.70515	BAA 3	25.364	14.4873	10.8767	4.02562	0.0614
Average	21.7319	14.8808	6.85111	Average	25.1328	14.4667	10.6661	3.81504	0.0721714
Median	21.7371	14.82	6.9171	Median	25.2651	14.4566	10.8085	3.95741	0.0643726
SD	0.207347	0.108009	0.126592	SD	0.31858	0.0178173	0.307556	0.307556	0.0161507
	P value								0.00807534
Col10a1	0.0001012
PPIA	0.002807
Ct	3.78663e-05
Relative Fold	16.9958
Fold Incr	0.0710491

## Sheet: Bglap2
Soure Data for Figure 9E_DLX3 shRNA with TH, AA, or AA/TH
2021 #10 ATDC5 DLX3 #32 shRNA							PPIA	2021-04-05	GG
No serum Free, RNA extracted at 3d							Bglap2	2021-04-08	GG
RNA Extractions done by DL
Nano, dilutions and RT done by DL
Used 1ug RNA for RT
Cntrl shRNA	Bglap2	PPIA	∆Ct	DLX3 (#32)	Bglap2	PPIA	∆Ct	∆∆Ct	Fold ∆
TH 1	23.8504	14.699	9.15142	TH 1	23.439	14.766	8.67297	-0.473331	1.38831
TH 2	23.8514	14.598	9.25339	TH 2	23.7324	14.717	9.01543	-0.130872	1.09496
TH 3	23.8151	14.689	9.12605	TH 3	24.4225	14.695	9.72751	0.581207	0.668404
TH 4	23.7153	14.661	9.05435	TH 4
Average	23.8081	14.6618	9.1463	Average	23.8646	14.726	9.13864	-0.00766501	1.05056
Median	23.8327	14.675	9.13873	Median	23.7324	14.717	9.01543	-0.130872	1.09496
SD	0.0640742	0.0454414	0.0823817	SD	0.504921	0.0363456	0.537957	0.537957	0.362001
	P value								0.181001
Bglap2	0.827758
PPIA	0.101806
Ct	0.977993
Relative Fold	0.281209
Fold Incr	1.00533
2018#19 - Control and DLX3 #32 shRNA (mission) 3d treatment BAA & BAA/TH
Cntrl shRNA	Bglap2	PPIA	∆Ct	DLX3 #32	Bglap2	PPIA	∆Ct	∆∆Ct	Fold ∆
BAA/TH 1	22.7718	15.0007	7.77113	BAA/TH 1	22.3263	14.9119	7.41433	-0.364335	1.28729
BAA/TH 2	22.7853	14.9991	7.78619	BAA/TH 2
BAA/TH 3				BAA/TH 3	22.6825	15.1804	7.50217	-0.276493	1.21125
Average	22.7785	14.8409	7.77866	Average	22.5044	14.5256	7.45825	-0.320414	1.24927
Median	22.7785	14.8647	7.77866	Median	22.5044	14.5297	7.45825	-0.320414	1.24927
SD	0.00952586	0.0959483	0.0106487	SD	0.251915	0.183997	0.0621137	0.0621137	0.0537692
	P value								0.0268846
Bglap2	0.263922
PPIA	0.763125
Ct	0.0187984
Relative Fold	0.0667189
Fold Incr	1.24869
Cntrl shRNA	Bglap2	PPIA	∆Ct	DLX3 #32	Bglap2	PPIA	∆Ct	∆∆Ct	Fold ∆
BAA 1	26.1871	14.8094	11.3776	BAA 1	29.1791	14.6426	14.5365	3.39444	0.0950979
BAA 2	25.7365	14.83	10.9065	BAA 2	29.3319	14.6629	14.6691	3.52699	0.0867503
BAA 3				BAA 3	29.6084	14.6745	14.9339	3.79183	0.0722016
Average	25.9618	14.8808	11.1421	Average	29.3732	14.4667	14.7132	3.57109	0.0846833
Median	25.9618	14.82	11.1421	Median	29.3319	14.4566	14.6691	3.52699	0.0867503
SD	0.318587	0.108009	0.333153	SD	0.217595	0.0178173	0.202328	0.202328	0.0115873
	P value								0.00579363
Bglap2	0.000694992
PPIA	0.00153188
Ct	0.000591514
Relative Fold	14.2386
Fold Incr	0.0841388

[truncated: 7 more sheets: Ibsp, Mgp, Spp1, Dmp1, Mmp9, Mmp13, Alpl]
