# Supplementary material for: Differences in pathways contributing to thyroid hormone effects on postnatal cartilage calcification versus secondary ossification center development
Source: eLife. 2022 Jan 31;11:e76730. doi: 10.7554/eLife.76730 (PMC8830887; doi:10.7554/eLife.76730)
Supplement: Figure 9—source data 5. — Reverse transcriptase quantitative polymerase chain reaction (RT-qPCR) data for DLX5 shRNA. Average fold changes plotted and t-test values are highlighted in yellow. [file elife-76730-fig9-data5.xlsx]

## Sheet: Sox9
Soure Data for Figure 9F_DLX5 shRNA with TH, AA, or AA/TH
2019#25 ATDC5 DLX5 #40 shRNA							PPIA	2020-04-08
Hit with 10MOI of virus							Sox9	2020-04-10
No serum Free, RNA extracted at 3d
RNA Extractions done by Jasmine Lau
Nano, dilutions and RT done by JL
Control shRNA	Sox9	PPIA	∆Ct	DLX5 #40	Sox9	PPIA	∆Ct	∆∆Ct	Fold Δ
TH 1	18.9007	14.5027	4.39801	TH 1	19.4274	14.4349	4.99251	0.496744	0.708704
TH 2	19.2311	14.4795	4.75155	TH 2	19.347	14.4605	4.88656	0.390795	0.762709
TH 3	18.8785	14.4674	4.41111	TH 3	19.2571	14.4554	4.80174	0.305976	0.808895
TH 4	18.8911	14.4687	4.4224	TH 4	19.4294	14.465	4.96446	0.468693	0.722619
Average	18.9754	14.4796	4.49577	Average	19.3652	14.4539	4.91132	0.415552	0.750732
Median	18.8959	14.4741	4.41675	Median	19.3872	14.4579	4.92551	0.429744	0.742664
SD	0.170716	0.0163386	0.170815	SD	0.0816449	0.0132892	0.085705	0.085705	0.0450298
	P value								0.0225149
Sox9	0.00621242
PPIA	0.0505895
Ct	0.0048288
Relative Fold	0.251258
Fold Incr	0.749733
Control shRNA	Sox9	PPIA	∆Ct	DLX5 #40	Sox9	PPIA	∆Ct	∆∆Ct	Fold Δ
AA/TH 1	19.1809	14.5659	4.61495	AA/TH 1	19.5294	14.4517	5.07772	0.0785663	0.946998
AA/TH 2	20.0965	14.6862	5.41029	AA/TH 2	19.7538	14.4721	5.28171	0.282556	0.822133
AA/TH 3	19.6012	14.6211	4.98017	AA/TH 3	19.5593	14.5095	5.04981	0.0506561	0.965497
AA/TH 4	19.6332	14.642	4.9912	AA/TH 4	19.161	14.4504	4.71061	-0.288546	1.22141
Average	19.6279	14.6288	4.99915	Average	19.5009	14.4709	5.02996	0.0308082	0.989009
Median	19.6172	14.6315	4.98569	Median	19.5444	14.4619	5.06376	0.0646112	0.956248
SD	0.374224	0.0499357	0.3251	SD	0.24745	0.0275725	0.236671	0.236671	0.167506
	P value								0.083753
Sox9	0.591616
PPIA	0.00146569
Ct	0.883242
Relative Fold	0.0715449
Fold Incr	0.978872
Control shRNA	Sox9	PPIA	∆Ct	DLX5 #40	Sox9	PPIA	∆Ct	∆∆Ct	Fold Δ
AA 1	18.8792	14.5768	4.30237	AA 1	19.7417	14.5459	5.19579	0.882809	0.542311
AA2	18.9382	14.5859	4.35233	AA2	19.2583	14.5033	4.75506	0.442077	0.736074
AA 3	18.7958	14.5907	4.2051	AA 3	19.3098	14.4553	4.85448	0.541497	0.687057
AA 4	19.0066	14.6144	4.39212	AA 4	19.0893	14.5029	4.5865	0.273514	0.827302
Average	18.9049	14.592	4.31298	Average	19.3498	14.5018	4.84796	0.534974	0.698186
Median	18.9087	14.5883	4.32735	Median	19.284	14.5031	4.80477	0.491787	0.711566
SD	0.0894479	0.0160471	0.0807523	SD	0.277726	0.0370324	0.256919	0.256919	0.119062
	P value								0.0595311
Sox9	0.0225351
PPIA	0.00425319
Ct	0.00734251
Relative Fold	0.627096
Fold Incr	0.690171

## Sheet: Runx2
Soure Data for Figure 9F_DLX5 shRNA with TH, AA, or AA/TH
2019#25 ATDC5 DLX5 #40 shRNA							PPIA	2020-04-06	2021-04-21	GG
Hit with 10MOI of virus							Runx2	2020-04-08	2021-04-21	GG
No serum Free, RNA extracted at 3d				New RT done by GG 4/21/21
RNA Extractions done by Jasmine Lau
Nano, dilutions and RT done by JL
Control shRNA	Runx2	PPIA	∆Ct	DLX5 #40	Runx2	PPIA	∆Ct	∆∆Ct	Fold Δ
TH 1	18.2838	14.5027	3.78112	TH 1	18.3578	14.4349	3.92296	0.650443	0.637085
TH 2	18.3268	14.4795	3.84732	TH 2	18.165	14.4605	3.70452	0.432008	0.741229
TH 3	17.872	14.4674	3.40457	TH 3	18.274	14.4554	3.81859	0.54608	0.684879
TH 4	16.5258	14.4687	2.05704	TH 4	18.23	14.465	3.76509	0.492577	0.710754
Average	17.7521	14.4796	3.27251	Average	18.2567	14.4539	3.80279	0.530277	0.693487
Median	18.0779	14.4741	3.59284	Median	18.252	14.4579	3.79184	0.519328	0.697817
SD	0.842868	0.0163386	0.833445	SD	0.0809285	0.0132892	0.0926782	0.0926782	0.044094
	P value								0.022047
Runx2	0.278315
PPIA	0.0505895
Ct	0.252881
Relative Fold	0.388073
Fold Incr	0.692422
Control shRNA	Runx2	PPIA	∆Ct	DLX5 #40	Runx2	PPIA	∆Ct	∆∆Ct	Fold Δ
AA/TH 1	17.9159	14.5161	3.39976	AA/TH 1	17.7403	14.4207	3.31963	-0.0221863	1.0155
AA/TH 2	17.9955	14.6436	3.35193	AA/TH 2	17.9394	14.4504	3.48899	0.147169	0.903021
AA/TH 3	17.8813	14.4525	3.4288	AA/TH 3	17.9637	14.4471	3.5166	0.174784	0.8859
AA/TH 4	17.5908	14.404	3.18678	AA/TH 4	18.1877	14.4793	3.70839	0.366571	0.775624
Average	17.8459	14.504	3.34182	Average	17.9578	14.4494	3.5084	0.166584	0.89501
Median	17.8986	14.4843	3.37584	Median	17.9516	14.4488	3.50279	0.160976	0.89446
SD	0.176665	0.103753	0.108108	SD	0.183048	0.0239755	0.159241	0.159241	0.0981792
	P value								0.0490896
Runx2	0.412737
PPIA	0.344232
Ct	0.134168
Relative Fold	0.106162
Fold Incr	0.890949
Control shRNA	Runx2	PPIA	∆Ct	DLX5 #40	Runx2	PPIA	∆Ct	∆∆Ct	Fold Δ
AA 1	17.9563	14.4794	3.47689	AA 1	18.0152	14.4589	3.55628	0.15609	0.897454
AA2	17.8857	14.4698	3.41588	AA2	17.8754	14.4626	3.41281	0.0126204	0.99129
AA 3	17.9113	14.4847	3.42653	AA 3	17.7472	14.4155	3.33166	-0.0685248	1.04864
AA 4	17.8773	14.5958	3.28146	AA 4	17.84	14.4163	3.4237	0.0235085	0.983837
Average	17.9076	14.5075	3.40019	Average	17.8694	14.4383	3.43111	0.0309236	0.980306
Median	17.8985	14.4821	3.42121	Median	17.8577	14.4376	3.41825	0.0180645	0.987564
SD	0.0355207	0.0592437	0.0835072	SD	0.111212	0.0259437	0.0929994	0.0929994	0.0623636
	P value								0.0311818
Runx2	0.537112
PPIA	0.0764079
Ct	0.638322
Relative Fold	0.0153569
Fold Incr	0.978793

## Sheet: Dlx3
Soure Data for Figure 9F_DLX5 shRNA with TH, AA, or AA/TH
2019#25 ATDC5 DLX5 #40 shRNA							PPIA	2020-04-06	PPIA	2021-04-21
Hit with 10MOI of virus							Dlx3	2020-04-06	Dlx3	2021-04-21
No serum Free, RNA extracted at 3d										GG
RNA Extractions done by Jasmine Lau
Nano, dilutions and RT done by JL
Control shRNA	Dlx3	PPIA	∆Ct	DLX5 #40	Dlx3	PPIA	∆Ct	∆∆Ct	Fold Δ
TH 1	27.8734	14.5027	13.3707	TH 1	28.6639	14.4349	14.2291	0.981279	0.50653
TH 2	27.7802	14.4795	13.3007	TH 2	28.198	14.4605	13.7375	0.489733	0.712157
TH 3	27.3184	14.4674	12.851	TH 3	28.3428	14.4554	13.8874	0.639607	0.641888
TH 4	27.9375	14.4687	13.4688	TH 4	28.8056	14.465	14.3406	1.09282	0.468845
Average	27.7274	14.4796	13.2478	Average	28.5026	14.4539	14.0486	0.800859	0.582355
Median	27.8268	14.4741	13.3357	Median	28.5034	14.4579	14.0582	0.810443	0.574209
SD	0.280189	0.0163386	0.273352	SD	0.280565	0.0132892	0.283192	0.283192	0.114057
	P value								0.0570283
Dlx3	0.00789241
PPIA	0.0505895
Ct	0.00658006
Relative Fold	1.17517
Fold Incr	0.574007
Control shRNA	Dlx3	PPIA	∆Ct	DLX5 #40	Dlx3	PPIA	∆Ct	∆∆Ct	Fold Δ
AA/TH 1	26.2929	14.5161	11.7768	AA/TH 1	25.5038	14.4207	11.0831	-0.197975	1.14709
AA/TH 2	25.9742	14.6436	11.3306	AA/TH 2
AA/TH 3				AA/TH 3	25.49	14.4471	11.0428	-0.238197	1.17952
AA/TH 4	25.1397	14.404	10.7357	AA/TH 4	26.9093	14.4793	12.43	1.14899	0.45094
Average	25.8023	14.5212	11.281	Average	25.9677	14.449	11.5186	0.237607	0.925848
Median	25.9742	14.5161	11.3306	Median	25.5038	14.4471	11.0831	-0.197975	1.14709
SD	0.595504	0.119888	0.522285	SD	0.815525	0.029352	0.789539	0.789539	0.411602
	P value								0.205801
Dlx3	0.790702
PPIA	0.368327
Ct	0.686178
Relative Fold	1.05503
Fold Incr	0.848151
Control shRNA	Dlx3	PPIA	∆Ct	DLX5 #40	Dlx3	PPIA	∆Ct	∆∆Ct	Fold Δ
AA 1	27.022	14.4794	12.5426	AA 1	25.9735	14.4589	11.5146	-1.22268	2.3338
AA2	27.3592	14.4698	12.8894	AA2
AA 3	27.2646	14.4847	12.7798	AA 3	26.3722	14.4155	11.9567	-0.780567	1.71781
AA 4				AA 4	26.5543	14.4163	12.138	-0.599232	1.51491
Average	27.2153	14.478	12.7373	Average	26.3	14.4302	11.8698	-0.867494	1.85551
Median	27.2646	14.4794	12.7798	Median	26.3722	14.4163	11.9567	-0.780567	1.71781
SD	0.173946	0.00756858	0.177304	SD	0.297056	0.0248514	0.320686	0.320686	0.426458
	P value								0.213229
Dlx3	0.0099926
PPIA	0.0334269
Ct	0.014848
Relative Fold	0.298999
Fold Incr	1.82449

## Sheet: Dlx5
Soure Data for Figure 9F_DLX5 shRNA with TH, AA, or AA/TH
2019#25 ATDC5 Dlx5 #40 shRNA							PPIA	2019-07-16
Hit with 10MOI of virus							Dlx5	2019-07-16
No serum Free, RNA extracted at 3d
RNA Extractions done by Jasmine Lau
Nano, dilutions and RT done by JL
Cntrl shRNA	Dlx5	PPIA	∆Ct	Dlx5	Dlx5	PPIA	∆Ct	∆∆Ct	Fold Δ
TH 1	20.1679	14.503	5.66495	TH 1	22.2146	14.511	7.70362	1.89675	0.268547
TH 2	20.2728	14.4795	5.79332	TH 2	22.1365	14.5262	7.61031	1.80344	0.286491
TH 3	20.329	14.5979	5.73116	TH 3	21.939	14.5576	7.38134	1.57447	0.335767
TH 4	20.6987	14.6606	6.03806	TH 4	22.4883	14.5515	7.9368	2.12993	0.228468
Average	20.3671	14.5602	5.80687	Average	22.1946	14.5366	7.65802	1.85115	0.279818
Median	20.3009	14.5504	5.76224	Median	22.1756	14.5388	7.65697	1.85009	0.277519
SD	0.230909	0.0842433	0.162792	SD	0.227569	0.0218046	0.229948	0.229948	0.044492
	P value								0.022246
Dlx5	2.91272e-05
PPIA	0.60587
Ct	1.19844e-05
Relative Fold	4.33096
Fold Incr	0.277172
Cntrl shRNA	Dlx5	PPIA	∆Ct	Dlx5	Dlx5	PPIA	∆Ct	∆∆Ct	Fold Δ
AA/TH 1	19.8484	14.5863	5.26218	AA/TH 1	21.9492	14.5248	7.42438	1.93957	0.260694
AA/TH 2	20.3054	14.6833	5.62209	AA/TH 2	22.7358	14.5518	8.18407	2.69925	0.153973
AA/TH 3	19.9138	14.5146	5.39926	AA/TH 3	22.5573	14.5826	7.97472	2.48991	0.178017
AA/TH 4	20.2316	14.5759	5.65572	AA/TH 4	22.4659	14.6144	7.85151	2.36669	0.19389
Average	20.0748	14.59	5.48481	Average	22.4271	14.5684	7.85867	2.37386	0.196644
Median	20.0727	14.5811	5.51068	Median	22.5116	14.5672	7.91312	2.4283	0.185954
SD	0.22725	0.0697801	0.187027	SD	0.337711	0.0386787	0.320421	0.320421	0.045745
	P value								0.0228725
Dlx5	2.52357e-05
PPIA	0.607413
Ct	1.39852e-05
Relative Fold	7.25912
Fold Incr	0.192929
Cntrl shRNA	Dlx5	PPIA	∆Ct	Dlx5	Dlx5	PPIA	∆Ct	∆∆Ct	Fold Δ
AA 1	20.47	14.6193	5.85073	AA 1	22.7803	14.5639	8.21636	2.2902	0.204447
AA2	20.6361	14.6408	5.99534	AA2	22.6648	14.5762	8.08859	2.16243	0.223379
AA 3	20.425	14.6128	5.81222	AA 3	22.3573	14.5027	7.85469	1.92853	0.262696
AA 4	20.6546	14.6083	6.04635	AA 4	22.4702	14.5527	7.91751	1.99136	0.251503
Average	20.5464	14.6203	5.92616	Average	22.5682	14.5489	8.01929	2.09313	0.235506
Median	20.5531	14.616	5.92303	Median	22.5675	14.5583	8.00305	2.07689	0.237441
SD	0.115952	0.0144079	0.112405	SD	0.190075	0.0322713	0.164409	0.164409	0.0265011
	P value								0.0132506
Dlx5	1.79472e-06
PPIA	0.00678712
Ct	7.55431e-07
Relative Fold	5.09648
Fold Incr	0.234372

## Sheet: Dlx6
Soure Data for Figure 9F_DLX5 shRNA with TH, AA, or AA/TH
2019#25 ATDC5 DLX5 #40 shRNA							PPIA	2021-04-21	GG
Hit with 10MOI of virus							Dlx6	2021-04-21	GG
No serum Free, RNA extracted at 3d				GG did RT 4/21/21
RNA Extractions done by Jasmine Lau
Nano, dilutions and RT done by JL
Control shRNA	Dlx6.2	PPIA	∆Ct	DLX5 #40	Dlx6.2	PPIA	∆Ct	∆∆Ct	Fold Δ
TH 1	20.6842	14.5027	6.18152	TH 1	20.7063	14.4349	6.27148	0.0634654	0.956963
TH 2	20.7183	14.4795	6.2388	TH 2	20.9552	14.4605	6.49475	0.286734	0.819756
TH 3	20.522	14.4674	6.0546	TH 3	20.7895	14.4554	6.3341	0.126083	0.916316
TH 4	20.8259	14.4687	6.35715	TH 4	20.9735	14.465	6.5085	0.300485	0.811979
Average	20.6876	14.4796	6.20802	Average	20.8561	14.4539	6.40221	0.194192	0.876254
Median	20.7013	14.4741	6.21016	Median	20.8724	14.4579	6.41443	0.206408	0.868036
SD	0.125838	0.0163386	0.125738	SD	0.129688	0.0132892	0.117743	0.117743	0.0717452
	P value								0.0358726
Dlx6.2	0.111434
PPIA	0.0505895
Ct	0.0650257
Relative Fold	0.0973035
Fold Incr	0.874062
Control shRNA	Dlx6	PPIA	∆Ct	DLX5 #40	Dlx6	PPIA	∆Ct	∆∆Ct	Fold Δ
AA/TH 1	19.7446	14.5161	5.22848	AA/TH 1	19.9558	14.4207	5.53511	0.299955	0.812278
AA/TH 2	19.8198	14.6436	5.17618	AA/TH 2	19.8118	14.4504	5.36139	0.126236	0.916219
AA/TH 3	19.7616	14.4525	5.30915	AA/TH 3	19.5894	14.4471	5.14233	-0.0928249	1.06646
AA/TH 4	19.6308	14.404	5.22679	AA/TH 4	20.2323	14.4793	5.75302	0.51787	0.698402
Average	19.7392	14.504	5.23515	Average	19.8973	14.4494	5.44796	0.212809	0.873339
Median	19.7531	14.4843	5.22764	Median	19.8838	14.4488	5.44825	0.213096	0.864248
SD	0.0791173	0.103753	0.054981	SD	0.269417	0.0239755	0.259206	0.259206	0.156487
	P value								0.0782434
Dlx6	0.302995
PPIA	0.344232
Ct	0.159338
Relative Fold	0.222798
Fold Incr	0.862856
Control shRNA	Dlx6	PPIA	∆Ct	DLX5 #40	Dlx6	PPIA	∆Ct	∆∆Ct	Fold Δ
AA 1	20.2148	14.4794	5.73535	AA 1	19.9866	14.4589	5.52767	0.0633163	0.957062
AA2	20.1172	14.4698	5.64739	AA2	20.013	14.4626	5.55044	0.0860949	0.942069
AA 3	19.7324	14.4847	5.2477	AA 3	19.8657	14.4155	5.45015	-0.0142002	1.00989
AA 4	19.8228	14.5958	5.22696	AA 4	19.8134	14.4163	5.39713	-0.0672188	1.04769
Average	19.9718	14.5075	5.46435	Average	19.9197	14.4383	5.48135	0.0169981	0.989179
Median	19.97	14.4821	5.44755	Median	19.9261	14.4376	5.48891	0.0245581	0.983477
SD	0.230704	0.0592437	0.264724	SD	0.0955689	0.0259437	0.0706766	0.0706766	0.048662
	P value								0.024331
Dlx6	0.690855
PPIA	0.0764079
Ct	0.905308
Relative Fold	0.00768685
Fold Incr	0.988287

## Sheet: Sp7
Soure Data for Figure 9F_DLX5 shRNA with TH, AA, or AA/TH
2019#25 ATDC5 DLX5 #40 shRNA							PPIA	2020-04-06	2021-04-21	GG
Hit with 10MOI of virus							Sp7	2020-04-06	2021-04-21	GG
No serum Free, RNA extracted at 3d				New RT done by GG 4/21/21
RNA Extractions done by Jasmine Lau
Nano, dilutions and RT done by JL
Control shRNA	Sp7	PPIA	∆Ct	DLX5 #40	Sp7	PPIA	∆Ct	∆∆Ct	Fold Δ
TH 1	20.8365	14.5027	6.33384	TH 1	20.7952	14.4349	6.36035	0.0816891	0.944951
TH 2	20.6852	14.4795	6.20567	TH 2	20.897	14.4605	6.43652	0.157861	0.896353
TH 3	20.7816	14.4674	6.31416	TH 3	20.7462	14.4554	6.2908	0.0121367	0.991623
TH 4	20.7297	14.4687	6.26097	TH 4	20.9638	14.465	6.49881	0.220145	0.858479
Average	20.7583	14.4796	6.27866	Average	20.8505	14.4539	6.39662	0.117958	0.922851
Median	20.7556	14.4741	6.28757	Median	20.8461	14.4579	6.39844	0.119775	0.920652
SD	0.065386	0.0163386	0.0575749	SD	0.0981916	0.0132892	0.0904579	0.0904579	0.0579189
	P value								0.0289594
Sp7	0.168736
PPIA	0.0505895
Ct	0.0700865
Relative Fold	0.0434371
Fold Incr	0.921491
Control shRNA	Sp7	PPIA	∆Ct	DLX5 #40	Sp7	PPIA	∆Ct	∆∆Ct	Fold Δ
AA/TH 1	19.872	14.5161	5.35587	AA/TH 1	19.9268	14.4207	5.50613	0.101735	0.931912
AA/TH 2	19.8094	14.6436	5.16577	AA/TH 2	20.2005	14.4504	5.7501	0.345709	0.786921
AA/TH 3	20.144	14.4525	5.69153	AA/TH 3	19.8555	14.4471	5.40838	0.00398509	0.997242
AA/TH 4				AA/TH 4
Average	19.9418	14.5374	5.40439	Average	19.9943	14.4394	5.55487	0.150476	0.905358
Median	19.872	14.5161	5.35587	Median	19.9268	14.4471	5.50613	0.101735	0.931912
SD	0.177892	0.097327	0.266218	SD	0.182129	0.0162844	0.175999	0.175999	0.107645
	P value								0.0538227
Sp7	0.739051
PPIA	0.160578
Ct	0.459956
Relative Fold	0.106586
Fold Incr	0.900953
Control shRNA	Sp7	PPIA	∆Ct	DLX5 #40	Sp7	PPIA	∆Ct	∆∆Ct	Fold Δ
AA 1	19.8601	14.4794	5.38065	AA 1	20.4696	14.4589	6.01061	0.282041	0.822427
AA2	20.2574	14.4698	5.78755	AA2	20.4342	14.4626	5.97166	0.24309	0.844934
AA 3	20.2819	14.4847	5.79713	AA 3	20.2241	14.4155	5.80858	0.0800109	0.946051
AA 4	20.5448	14.5958	5.94895	AA 4	20.0998	14.4163	5.68351	-0.0450635	1.03173
Average	20.236	14.5075	5.72857	Average	20.3069	14.4383	5.86859	0.14002	0.911285
Median	20.2696	14.4821	5.79234	Median	20.3292	14.4376	5.89012	0.161551	0.895492
SD	0.282388	0.0592437	0.243444	SD	0.175516	0.0259437	0.151273	0.151273	0.0966327
	P value								0.0483163
Sp7	0.684651
PPIA	0.0764079
Ct	0.366275
Relative Fold	0.0848513
Fold Incr	0.907507

## Sheet: Col1a1
Soure Data for Figure 9F_DLX5 shRNA with TH, AA, or AA/TH
2019#25 ATDC5 DLX5 #40 shRNA							PPIA	2020-04-08	2021-04-19	GG
Hit with 10MOI of virus							Col1a1	2020-04-10	2021-05-03	GG
No serum Free, RNA extracted at 3d
RNA Extractions done by Jasmine Lau
Nano, dilutions and RT done by JL
Control shRNA	Col1a1	PPIA	∆Ct	DLX5 #40	Col1a1	PPIA	∆Ct	∆∆Ct	Fold Δ
TH 1	24.8735	14.5027	10.3708	TH 1	26.6832	14.4349	12.2484	1.80877	0.285435
TH 2	25.4199	14.4795	10.9403	TH 2	25.4617	14.4605	11.0013	0.561651	0.677526
TH 3	24.7326	14.4674	10.2652	TH 3	25.8347	14.4554	11.3793	0.9397	0.521341
TH 4	24.6508	14.4687	10.182	TH 4	26.2087	14.465	11.7438	1.30417	0.404955
Average	24.9192	14.4796	10.4396	Average	26.0471	14.4539	11.5932	1.15357	0.472315
Median	24.8031	14.4741	10.318	Median	26.0217	14.4579	11.5615	1.12193	0.463148
SD	0.346215	0.0163386	0.342642	SD	0.522362	0.0132892	0.531685	0.531685	0.167309
	P value								0.0836544
Col1a1	0.0113721
PPIA	0.0505895
Ct	0.0107385
Relative Fold	2.84009
Fold Incr	0.449511
Control shRNA	Col1a1	PPIA	∆Ct	DLX5 #40	Col1a1	PPIA	∆Ct	∆∆Ct	Fold Δ
AA/TH 1	14.3029	14.5659	-0.263016	AA/TH 1	14.4203	14.4517	-0.031436	0.251198	0.840198
AA/TH 2	14.3817	14.6862	-0.304482	AA/TH 2	14.4814	14.4721	0.00932217	0.291956	0.816794
AA/TH 3	14.3503	14.6211	-0.270779	AA/TH 3	14.4532	14.5095	-0.0562658	0.226368	0.854784
AA/TH 4	14.3498	14.642	-0.29226	AA/TH 4	14.4136	14.4504	-0.0368395	0.245795	0.843351
Average	14.3462	14.6288	-0.282634	Average	14.4421	14.4709	-0.0288048	0.253829	0.838782
Median	14.35	14.6315	-0.281519	Median	14.4367	14.4619	-0.0341377	0.248496	0.841775
SD	0.0324745	0.0499357	0.0191085	SD	0.0314029	0.0275725	0.0275636	0.0275636	0.0159419
	P value								0.00797093
Col1a1	0.00539191
PPIA	0.00146569
Ct	5.24466e-06
Relative Fold	0.0791819
Fold Incr	0.838667
Control shRNA	Col1a1	PPIA	∆Ct	DLX5 #40	Col1a1	PPIA	∆Ct	∆∆Ct	Fold Δ
AA 1	14.2467	14.5768	-0.330131	AA 1	14.5238	14.5459	-0.0221348	0.250352	0.840691
AA2	14.2789	14.5859	-0.306934	AA2	14.5187	14.5033	0.0153666	0.287853	0.81912
AA 3	14.3345	14.5907	-0.256252	AA 3	14.5181	14.4553	0.0628586	0.335345	0.792594
AA 4	14.4178	14.6144	-0.19663	AA 4	14.5217	14.5029	0.0188694	0.291356	0.817134
Average	14.3195	14.592	-0.272487	Average	14.5206	14.5018	0.0187399	0.291227	0.817385
Median	14.3067	14.5883	-0.281593	Median	14.5202	14.5031	0.017118	0.289605	0.818127
SD	0.0749058	0.0160471	0.0592377	SD	0.00266199	0.0370324	0.0347783	0.0347783	0.0196709
	P value								0.00983544
Col1a1	0.00171858
PPIA	0.00425319
Ct	0.000147136
Relative Fold	0.106279
Fold Incr	0.817207

## Sheet: Col2a1
Soure Data for Figure 9F_DLX5 shRNA with TH, AA, or AA/TH
2019#25 ATDC5 DLX5 #40 shRNA							PPIA	2020-04-06	2021-04-19	GG
Hit with 10MOI of virus							Col2a1	2020-04-06	2021-05-03	GG
No serum Free, RNA extracted at 3d
RNA Extractions done by Jasmine Lau
Nano, dilutions and RT done by JL
Control shRNA	Col2a1	PPIA	∆Ct	DLX5 #40	Col2a1	PPIA	∆Ct	∆∆Ct	Fold Δ
TH 1	19.9863	14.5027	5.48363	TH 1	20.0561	14.4349	5.62122	0.194133	0.874098
TH 2	19.9711	14.4795	5.49154	TH 2	20.1546	14.4605	5.69418	0.267091	0.830994
TH 3	19.7736	14.4674	5.30623	TH 3	20.0081	14.4554	5.55267	0.12558	0.916636
TH 4	19.8957	14.4687	5.42698	TH 4	19.8902	14.465	5.42525	-0.00184655	1.00128
Average	19.9067	14.4796	5.42709	Average	20.0272	14.4539	5.57333	0.146239	0.905752
Median	19.9334	14.4741	5.4553	Median	20.0321	14.4579	5.58695	0.159856	0.895367
SD	0.0971478	0.0163386	0.0855537	SD	0.109862	0.0132892	0.11439	0.11439	0.072652
	P value								0.036326
Col2a1	0.151241
PPIA	0.0505895
Ct	0.0865371
Relative Fold	0.0679274
Fold Incr	0.903603
Control shRNA	Col2a1	PPIA	∆Ct	DLX5 #40	Col2a1	PPIA	∆Ct	∆∆Ct	Fold Δ
AA/TH 1	18.6976	14.5161	4.18142	AA/TH 1	19.0184	14.4207	4.59771	0.389315	0.763492
AA/TH 2	18.9431	14.6436	4.29949	AA/TH 2	18.9382	14.4504	4.48774	0.279346	0.823964
AA/TH 3	18.6616	14.4525	4.20909	AA/TH 3	18.7387	14.4471	4.29156	0.0831699	0.943981
AA/TH 4	18.5475	14.404	4.14357	AA/TH 4	19.3609	14.4793	4.88158	0.673182	0.627122
Average	18.7124	14.504	4.20839	Average	19.014	14.4494	4.56465	0.356253	0.78964
Median	18.6796	14.4843	4.19526	Median	18.9783	14.4488	4.54272	0.334331	0.793728
SD	0.166533	0.103753	0.0664079	SD	0.259425	0.0239755	0.246323	0.246323	0.131776
	P value								0.0658882
Col2a1	0.0981484
PPIA	0.344232
Ct	0.0314591
Relative Fold	0.363099
Fold Incr	0.781191
Control shRNA	Col2a1	PPIA	∆Ct	DLX5 #40	Col2a1	PPIA	∆Ct	∆∆Ct	Fold Δ
AA 1	18.7048	14.4794	4.22536	AA 1	19.4274	14.4589	4.9685	0.469833	0.722048
AA2	18.9862	14.4698	4.5164	AA2	19.465	14.4626	5.00239	0.50372	0.705286
AA 3	19.1988	14.4847	4.71406	AA 3	19.3082	14.4155	4.89273	0.394065	0.760982
AA 4	19.1347	14.5958	4.53885	AA 4
Average	19.0061	14.5075	4.49867	Average	19.4002	14.4457	4.95454	0.455873	0.729439
Median	19.0604	14.4821	4.52762	Median	19.4274	14.4589	4.9685	0.469833	0.722048
SD	0.219738	0.0592437	0.202501	SD	0.0818355	0.026192	0.0561444	0.0561444	0.0285742
	P value								0.0142871
Col2a1	0.0337755
PPIA	0.158226
Ct	0.0138358
Relative Fold	0.262161
Fold Incr	0.729069

## Sheet: Col10a1
Soure Data for Figure 9F_DLX5 shRNA with TH, AA, or AA/TH
2019#25 ATDC5 DLX5 #40 shRNA							PPIA	2019-07-16
Hit with 10MOI of virus							Col10a1	2019-07-19
No serum Free, RNA extracted at 3d
RNA Extractions done by Jasmine Lau
Nano, dilutions and RT done by JL
GFP	Col10a1	PPIA	∆Ct	DLX5 #40	Col10a1	PPIA	∆Ct	∆∆Ct	Fold Δ
TH 1	26.1025	14.503	11.5995	TH 1	27.2078	14.511	12.6968	0.898641	0.536392
TH 2	26.3773	14.4795	11.8978	TH 2	26.5908	14.5262	12.0647	0.266538	0.831312
TH 3	26.5942	14.5979	11.9963	TH 3	26.5264	14.5576	11.9688	0.170672	0.888429
TH 4	26.3596	14.6606	11.6989	TH 4	26.9678	14.5515	12.4164	0.618253	0.651459
Average	26.3584	14.5602	11.7981	Average	26.8232	14.5366	12.2867	0.488526	0.726898
Median	26.3684	14.5504	11.7984	Median	26.7793	14.5388	12.2405	0.442396	0.741386
SD	0.201189	0.0842433	0.181183	SD	0.321919	0.0218046	0.334332	0.334332	0.162253
	P value								0.0811265
Col10a1	0.0498569
PPIA	0.60587
Ct	0.0423711
Relative Fold	0.677095
Fold Incr	0.712753
GFP	Col10a1	PPIA	∆Ct	DLX5 #40	Col10a1	PPIA	∆Ct	∆∆Ct	Fold Δ
AA/TH 1	25.3303	14.5863	10.744	AA/TH 1	25.7964	14.5248	11.2716	0.57976	0.669075
AA/TH 2	25.3345	14.6833	10.6512	AA/TH 2	25.6891	14.5518	11.1374	0.445563	0.734298
AA/TH 3	25.7231	14.5146	11.2086	AA/TH 3	26.295	14.5826	11.7125	1.02067	0.492887
AA/TH 4	24.7393	14.5759	10.1634	AA/TH 4	26.2504	14.6144	11.636	0.944252	0.519699
Average	25.2818	14.59	10.6918	Average	26.0078	14.5684	11.4394	0.747561	0.60399
Median	25.3324	14.5811	10.6976	Median	26.0234	14.5672	11.4538	0.762006	0.594387
SD	0.405871	0.0697801	0.428422	SD	0.30963	0.0386787	0.27847	0.27847	0.116426
	P value								0.0582129
Col10a1	0.0294084
PPIA	0.607413
Ct	0.0264227
Relative Fold	1.05274
Fold Incr	0.595609
GFP	Col10a1	PPIA	∆Ct	DLX5 #40	Col10a1	PPIA	∆Ct	∆∆Ct	Fold Δ
AA 1	26.4131	14.6193	11.7939	AA 1	27.3333	14.5639	12.7694	0.933482	0.523593
AA2	26.6061	14.6408	11.9653	AA2	27.3907	14.5762	12.8144	0.978552	0.507489
AA 3	26.8287	14.6128	12.2159	AA 3	26.9548	14.5027	12.4521	0.616216	0.65238
AA 4	25.9768	14.6083	11.3686	AA 4	26.9189	14.5527	12.3663	0.53036	0.692382
Average	26.4562	14.6203	11.8359	Average	27.1494	14.5489	12.6005	0.764652	0.593961
Median	26.5096	14.616	11.8796	Median	27.144	14.5583	12.6107	0.774849	0.587986
SD	0.361884	0.0144079	0.356521	SD	0.247005	0.0322713	0.224486	0.224486	0.0922469
	P value								0.0461234
Col10a1	0.0194571
PPIA	0.00678712
Ct	0.0109666
Relative Fold	0.978396
Fold Incr	0.588595

## Sheet: Bglap2
Soure Data for Figure 9F_DLX5 shRNA with TH, AA, or AA/TH
2019#25 ATDC5 DLX5 #40 shRNA							PPIA	2020-04-06	2021-04-19	GG
Hit with 10MOI of virus							Bglap2	2020-04-06	2021-05-03	GG
No serum Free, RNA extracted at 3d
RNA Extractions done by Jasmine Lau
Nano, dilutions and RT done by JL
Control shRNA	Bglap2	PPIA	∆Ct	DLX5 #40	Bglap2	PPIA	∆Ct	∆∆Ct	Fold Δ
TH 1	19.5804	14.5027	5.07771	TH 1	22.2623	14.4349	7.82748	2.70627	0.153226
TH 2	19.3551	14.4795	4.8756	TH 2	22.3072	14.4605	7.84671	2.7255	0.151197
TH 3	19.583	14.4674	5.1156	TH 3	22.2547	14.4554	7.79928	2.67807	0.156251
TH 4	19.8847	14.4687	5.41597	TH 4	22.2938	14.465	7.8288	2.70758	0.153086
Average	19.6008	14.4796	5.12122	Average	22.2795	14.4539	7.82557	2.70435	0.15344
Median	19.5817	14.4741	5.09665	Median	22.2781	14.4579	7.82814	2.70692	0.153156
SD	0.21733	0.0163386	0.222957	SD	0.0250267	0.0132892	0.0195972	0.0195972	0.00208971
	P value								0.00104485
Bglap2	3.04883e-07
PPIA	0.0505895
Ct	3.29946e-07
Relative Fold	7.41991
Fold Incr	0.153429
Control shRNA	Bglap2	PPIA	∆Ct	DLX5 #40	Bglap2	PPIA	∆Ct	∆∆Ct	Fold Δ
AA/TH 1	23.6855	14.5161	9.16933	AA/TH 1	25.6412	14.4207	11.2205	1.98185	0.253165
AA/TH 2	23.9956	14.6436	9.35198	AA/TH 2	26.5312	14.4504	12.0808	2.8421	0.139458
AA/TH 3	23.8857	14.4525	9.43327	AA/TH 3	25.6367	14.4471	11.1896	1.95096	0.258644
AA/TH 4	23.404	14.404	9.00004	AA/TH 4
Average	23.7427	14.504	9.23866	Average	25.9364	14.4394	11.497	2.2583	0.217089
Median	23.7856	14.4843	9.26066	Median	25.6412	14.4471	11.2205	1.98185	0.253165
SD	0.25973	0.103753	0.193615	SD	0.515113	0.0162844	0.505818	0.505818	0.0672864
	P value								0.0336432
Bglap2	0.000665783
PPIA	0.344133
Ct	0.000398807
Relative Fold	7.64036
Fold Incr	0.209018
Control shRNA	Bglap2	PPIA	∆Ct	DLX5 #40	Bglap2	PPIA	∆Ct	∆∆Ct	Fold Δ
AA 1				AA 1	28.1289	14.4589	13.67	0.190631	0.876222
AA2	27.9671	14.4698	13.4973	AA2	27.7547	14.4626	13.2921	-0.187292	1.13862
AA 3	28.056	14.4847	13.5713	AA 3
AA 4	27.9654	14.5958	13.3696	AA 4	27.4886	14.4163	13.0723	-0.407056	1.32598
Average	27.9962	14.5168	13.4794	Average	27.7907	14.4459	13.3448	-0.134572	1.11361
Median	27.9671	14.4847	13.4973	Median	27.7547	14.4589	13.2921	-0.187292	1.13862
SD	0.0518583	0.0688549	0.102052	SD	0.321685	0.0257339	0.302311	0.302311	0.225919
	P value								0.112959
Bglap2	0.336196
PPIA	0.170316
Ct	0.505561
Relative Fold	0.0281362
Fold Incr	1.09777

[truncated: 7 more sheets: Ibsp, Mgp, Spp1, Dmp1, Mmp9, Mmp13, Alp]
