# Supplementary material for: Differences in pathways contributing to thyroid hormone effects on postnatal cartilage calcification versus secondary ossification center development
Source: eLife. 2022 Jan 31;11:e76730. doi: 10.7554/eLife.76730 (PMC8830887; doi:10.7554/eLife.76730)
Supplement: Figure 9—source data 6. — Reverse transcriptase quantitative polymerase chain reaction (RT-qPCR) data for SP7 shRNA without or with either DLX3 shRNA and/or DLX5 shRNA. Average fold changes plotted and t-test values are highlighted in yellow. [file elife-76730-fig9-data6.xlsx]

## Sheet: Bglap2
Source Data for Figure 9G
OSX shRNA
2018#25 - Control and SP7 #59 shRNA (mission) 3d treatment BG, BAA, TH & BAA/TH									2020-04-08	PPIA	2021-04-21
ATDC5 cells - Hit with virus 1x, hit with puro									2020-04-08	Bglap2	2021-04-21
10% FBS then switched to 5% FBS									threshold 0.04	JL	DL
** New RT on AA group done on 4/6/2020
Cntrl shRNA	Bglap2	PPIA	∆Ct	SP7 #59	Bglap2	PPIA	∆Ct	∆∆Ct	Fold ∆
TH 1	28.1857	14.4528	13.7329	TH 1
TH 2	27.7401	14.4137	13.3264	TH 2	25.1959	14.5593	10.6366	-2.83624	7.14155
TH 3	28.5538	14.6049	13.9489	TH 3	25.219	14.4911	10.7278	-2.74499	6.70384
TH 4	27.4426	14.5595	12.8831	TH 4	24.8153	14.414	10.4013	-3.0715	8.40649
Average	27.9805	14.5077	13.4728	Average	25.0767	14.4882	10.5886	-2.88424	7.41729
Median	27.9629	14.5062	13.5296	Median	25.1959	14.4911	10.6366	-2.83624	7.14155
SD	0.489198	0.089394	0.470289	SD	0.226688	0.0727071	0.168468	0.168468	0.884184
	P value								0.442092
Bglap2	0.000231675
PPIA	0.770374
Ct	0.000175134
Relative Fold	7.37543
Fold Incr	7.38318
DLX3 shRNA
2021 #10 ATDC5 DLX3 #32 shRNA							PPIA	2021-04-05	GG
No serum Free, RNA extracted at 3d							Bglap2	2021-04-08	GG
RNA Extractions done by DL
Nano, dilutions and RT done by DL
Used 1ug RNA for RT
Cntrl shRNA	Bglap2	PPIA	∆Ct	DLX3 (#32)	Bglap2	PPIA	∆Ct	∆∆Ct	Fold ∆
TH 1	23.8504	14.699	9.15142	TH 1	23.439	14.766	8.67297	-0.473331	1.38831
TH 2	23.8514	14.598	9.25339	TH 2	23.7324	14.717	9.01543	-0.130872	1.09496
TH 3	23.8151	14.689	9.12605	TH 3	24.4225	14.695	9.72751	0.581207	0.668404
TH 4	23.7153	14.661	9.05435	TH 4
Average	23.8081	14.6618	9.1463	Average	23.8646	14.726	9.13864	-0.00766501	1.05056
Median	23.8327	14.675	9.13873	Median	23.7324	14.717	9.01543	-0.130872	1.09496
SD	0.0640742	0.0454414	0.0823817	SD	0.504921	0.0363456	0.537957	0.537957	0.362001
	P value								0.181001
Bglap2	0.827758
PPIA	0.101806
Ct	0.977993
Relative Fold	0.281209
Fold Incr	1.00533
DLX5 shRNA
2019#25 ATDC5 DLX5 #40 shRNA							PPIA	2020-04-06	2021-04-19	GG
Hit with 10MOI of virus							Bglap2	2020-04-06	2021-05-03	GG
No serum Free, RNA extracted at 3d
RNA Extractions done by Jasmine Lau
Nano, dilutions and RT done by JL
Control shRNA	Bglap2	PPIA	∆Ct	DLX5 #40	Bglap2	PPIA	∆Ct	∆∆Ct	Fold Δ
TH 1	19.5804	14.5027	5.07771	TH 1	22.2623	14.4349	7.82748	2.70627	0.153226
TH 2	19.3551	14.4795	4.8756	TH 2	22.3072	14.4605	7.84671	2.7255	0.151197
TH 3	19.583	14.4674	5.1156	TH 3	22.2547	14.4554	7.79928	2.67807	0.156251
TH 4	19.8847	14.4687	5.41597	TH 4	22.2938	14.465	7.8288	2.70758	0.153086
Average	19.6008	14.4796	5.12122	Average	22.2795	14.4539	7.82557	2.70435	0.15344
Median	19.5817	14.4741	5.09665	Median	22.2781	14.4579	7.82814	2.70692	0.153156
SD	0.21733	0.0163386	0.222957	SD	0.0250267	0.0132892	0.0195972	0.0195972	0.00208971
	P value								0.00104485
Bglap2	3.04883e-07
PPIA	0.0505895
Ct	3.29946e-07
Relative Fold	7.41991
Fold Incr	0.153429
OSX/DLX3 shRNA
2021 #18 ATDC5 SP7/DLX3 double knBglap2kdown							PPIA	2021-06-24
Hit with 10MOI of virus							Bglap2	2021-07-01
No serum Free, RNA extracted at 3d								DL
RNA Extractions done by DL
Nano, dilutions and RT done by DL
Control shRNA	Bglap2	PPIA	∆Ct	SP7/DLX3	Bglap2	PPIA	∆Ct	∆∆Ct	Fold Δ
TH 1	29.4234	15.5256	13.8978	TH 1	27.3739	15.3259	12.048	-1.80779	3.50104
TH 2	29.7636	15.6633	14.1003	TH 2	27.7484	15.1843	12.5641	-1.29164	2.44806
TH 3	29.4379	15.4218	14.0161	TH 3	26.8974	15.2023	11.6951	-2.16063	4.47109
TH 4	29.368	15.9591	13.4088	TH 4	26.4121	15.2566	11.1555	-2.70027	6.49921
Average	29.4982	15.6424	13.8558	Average	27.108	15.2423	11.8657	-1.99008	4.22985
Median	29.4306	15.5945	13.9569	Median	27.1357	15.2295	11.8716	-1.98421	3.98607
SD	0.179495	0.233136	0.309313	SD	0.580064	0.0636648	0.592875	0.592875	1.72377
	P value								0.861885
Bglap2	0.000222339
PPIA	0.0161733
Ct	0.00100603
Relative Fold	1.95218
Fold Incr	3.97259
OSX/DLX5 shRNA
2021 #22 ATDC5 SP7/DLX5 double knBglap2kdown							PPIA	2021-07-23
Hit with 10MOI of virus							Bglap2	2021-07-27
No serum Free, RNA extracted at 3d								DL
RNA Extractions done by DL
Nano, dilutions and RT done by DL
Cntrl shRNA	Bglap2	PPIA	∆Ct	SP7/DLX5	Bglap2	PPIA	∆Ct	∆∆Ct	Fold Δ
TH 1	24.5067	15.409	9.0977	TH 1	21.1578	15.3529	5.80486	-3.26598	9.61964
TH 2	24.6461	15.4514	9.19468	TH 2	21.7446	15.3966	6.348	-2.72285	6.60175
TH 3	25.4532	15.8938	9.55946	TH 3	21.5245	14.7257	6.79871	-2.27214	4.8304
TH 4	24.0065	15.5749	8.43154	TH 4	21.3775	15.162	6.21552	-2.85533	7.23668
Average	24.6531	15.5823	9.07085	Average	21.4511	15.1593	6.29177	-2.77908	7.07212
Median	24.5764	15.5132	9.14619	Median	21.451	15.2574	6.28176	-2.78909	6.91921
SD	0.599953	0.219278	0.470287	SD	0.246963	0.306464	0.409486	0.409486	1.98019
	P value								0.990097
Bglap2	6.23781e-05
PPIA	0.0659092
Ct	0.00011117
Relative Fold	5.61495
Fold Incr	6.86412

## Sheet: Mmp9
Source Data for Figure 9G
OSX shRNA
2018#25 - Control and SP7 #59 shRNA (mission) 3d treatment BG, BAA, TH & BAA/TH									2019-07-02	PPIA
ATDC5 cells - Hit with virus 1x, hit with puro									2020-03-16	Mmp9
10% FBS then switched to 5% FBS									threshold 0.04	JL
Cntrl shRNA	Mmp9	PPIA	∆Ct	SP7 #59	Mmp9	PPIA	∆Ct	∆∆Ct	Fold ∆
TH 1	25.5434	14.314	11.2294	TH 1	25.833	14.3313	11.5017	0.478506	0.71772
TH 2				TH 2	24.7839	14.1975	10.5864	-0.436809	1.35361
TH 3	25.3976	14.424	10.9736	TH 3	24.6338	14.2426	10.3912	-0.631945	1.54965
TH 4	25.3561	14.333	11.0232	TH 4	24.3817	14.2273	10.1544	-0.868807	1.82615
Average	25.4324	14.357	11.0754	Average	24.9081	14.2497	10.6584	-0.364763	1.36178
Median	25.3976	14.333	11.0232	Median	24.7089	14.235	10.4888	-0.534377	1.45163
SD	0.0983527	0.0588297	0.135682	SD	0.638517	0.0575234	0.589276	0.589276	0.471104
	P value								0.235552
Mmp9	0.226943
PPIA	0.0601015
Ct	0.292705
Relative Fold	0.050406
Fold Incr	1.28767
DLX3 shRNA
2021 #10 ATDC5 DLX3 #32 shRNA							PPIA	2021-04-05	GG
No serum Free, RNA extracted at 3d							Mmp9	2021-04-07	DL
RNA Extractions done by DL
Nano, dilutions and RT done by DL
Used 1ug RNA for RT
Cntrl shRNA	Mmp9	PPIA	∆Ct	DLX3 (#32)	Mmp9	PPIA	∆Ct	∆∆Ct	Fold ∆
TH 1	23.5211	14.699	8.82205	TH 1	21.3392	14.766	6.57319	-2.19336	4.57371
TH 2	22.8649	14.598	8.26695	TH 2	20.9646	14.717	6.24761	-2.51895	5.73164
TH 3	23.3471	14.689	8.65811	TH 3	21.0234	14.695	6.32836	-2.43819	5.41961
TH 4	23.9801	14.661	9.3191	TH 4	21.2538	14.687	6.56683	-2.19972	4.59391
Average	23.4283	14.6618	8.76655	Average	21.1452	14.7162	6.429	-2.33756	5.07972
Median	23.4341	14.675	8.74008	Median	21.1386	14.706	6.4476	-2.31896	5.00676
SD	0.460814	0.0454414	0.435798	SD	0.179714	0.0355094	0.166153	0.166153	0.586683
	P value								0.293342
Mmp9	9.12044e-05
PPIA	0.107643
Ct	5.71373e-05
Relative Fold	4.71499
Fold Incr	5.05446
DLX5 shRNA
2019#25 ATDC5 DLX5 #40 shRNA							PPIA	2020-03-16	2021-04-19	GG
Hit with 10MOI of virus							Mmp9	2020-04-10	2021-05-03	GG
No serum Free, RNA extracted at 3d
RNA Extractions done by Jasmine Lau
Nano, dilutions and RT done by JL
Control shRNA	Mmp9	PPIA	∆Ct	DLX5 #40	Mmp9	PPIA	∆Ct	∆∆Ct	Fold Δ
TH 1	23.5274	14.5027	9.0247	TH 1	23.6118	14.4349	9.1769	0.2423	0.8454
TH 2	23.2325	14.4795	8.753	TH 2	23.6851	14.4605	9.2246	0.29	0.8179
TH 3	23.4416	14.4674	8.9742	TH 3	23.8476	14.4554	9.3922	0.4575	0.7282
TH 4	23.4554	14.4687	8.9866	TH 4	23.853	14.465	9.3881	0.4535	0.7303
Average	23.4142	14.4796	8.9346	Average	23.7494	14.4539	9.2954	0.3608	0.7805
Median	23.4485	14.4741	8.9804	Median	23.7663	14.4579	9.3064	0.3717	0.7741
SD	0.1269	0.0163	0.123	SD	0.1203	0.0133	0.1111	0.1111	0.0602
	P value								0.0301
Mmp9	0.0086249
PPIA	0.0505895
Ct	0.0047959
Relative Fold	0.2227
Fold Incr	0.7787
OSX/DLX3 shRNA
2021 #18 ATDC5 SP7/DLX3 double knockdown							PPIA	2021-06-24	DL
Hit with 10MOI of virus							Mmp9	2021-07-13	OP
No serum Free, RNA extracted at 3d
RNA Extractions done by DL
Nano, dilutions and RT done by DL
Control shRNA	Mmp9	PPIA	∆Ct	SP7/DLX3	Mmp9	PPIA	∆Ct	∆∆Ct	Fold Δ
TH 1	24.2786	15.5256	8.75301	TH 1
TH 2	23.7934	15.6633	8.13011	TH 2	23.7934	15.1843	8.60909	0.44996	0.732063
TH 3	23.2874	15.4218	7.86561	TH 3	23.2874	15.2023	8.08507	-0.0740604	1.05268
TH 4	23.8469	15.9591	7.8878	TH 4	23.8469	15.2566	8.59026	0.431132	0.741679
Average	23.8016	15.6424	8.15913	Average	23.6426	15.2144	8.42814	0.269011	0.842139
Median	23.8202	15.5945	8.00895	Median	23.7934	15.2023	8.59026	0.431132	0.741679
SD	0.405842	0.233136	0.413648	SD	0.308767	0.0376564	0.297257	0.297257	0.182393
	P value								0.0911964
Mmp9	0.597998
PPIA	0.0275724
Ct	0.38661
Relative Fold	0.320659
Fold Incr	0.829889
OSX/DLX5 shRNA
2021 #22 ATDC5 SP7/DLX5 double knockdown							PPIA	2021-07-23
Hit with 10MOI of virus							Mmp9	2021-08-12
No serum Free, RNA extracted at 3d								DL
RNA Extractions done by DL
Nano, dilutions and RT done by DL
Cntrl shRNA	Mmp9	PPIA	∆Ct	SP7/DLX5	Mmp9	PPIA	∆Ct	∆∆Ct	Fold Δ
TH 1	23.7896	15.409	8.38063	TH 1	24.8413	15.3529	9.48836	1.25864	0.417936
TH 2	23.7942	15.4514	8.34278	TH 2	24.8011	15.3966	9.40449	1.17477	0.442955
TH 3	23.775	15.8938	7.88123	TH 3	24.784	14.7257	10.0583	1.82856	0.281546
TH 4	23.8892	15.5749	8.31424	TH 4	24.7192	15.162	9.55729	1.32757	0.398439
Average	23.812	15.5823	8.22972	Average	24.7864	15.1593	9.6271	1.39738	0.385219
Median	23.7919	15.5132	8.32851	Median	24.7925	15.2574	9.52283	1.29311	0.408188
SD	0.0521037	0.219278	0.233914	SD	0.0507985	0.306464	0.294161	0.294161	0.0714768
	P value								0.0357384
Mmp9	1.78979e-07
PPIA	0.0659092
Ct	0.00030449
Relative Fold	2.86133
Fold Incr	0.379617
