# Supplementary material for: Differences in pathways contributing to thyroid hormone effects on postnatal cartilage calcification versus secondary ossification center development
Source: eLife. 2022 Jan 31;11:e76730. doi: 10.7554/eLife.76730 (PMC8830887; doi:10.7554/eLife.76730)
Supplement: Supplementary file 1. — Antigen retrieval with: HD = 2 mg/mL hyaluronidase (Sigma-Aldrich) in PBS at 37°C for 45 min. S = 10 mM sodium citrate with 2 mM EDTA and 0.05% Tween-20 (pH 6.0) at 95°C for 6 min. L = 10 mM sodium citrate with 2 mM EDTA and 0.05% Tween-20 (pH 6.0) at 60°C for 72 hr. [file elife-76730-supp1.xlsx]

## Sheet: Sheet1
	Methods Table 1. Antibodies used
		Vendor	Catalog#	dilution	Antigen Retrieval
	COL2A1	DSHB	CIIC1	.1:10	HD
	COL10A1	Abcam	ab58632	.1:100	HD
	COL1A1	Novus Biologicals	NB600-408	.1:100	HD
	MMP13	Novus Biologicals	NBP1-45723	.1:200	HD
	MMP9	Abcam	ab388898	.1:100	L
	CAR2	GeneTex	GTX53908	.1:100	HD
	IBSP	Dr. Renny Franceschi	Univ. Michigan	.1:100	HD
	BGLAP2	Abcam	ab93876	.1:250	HD
	DMP1	Novus Biologicals	NBP1-89484	.1:100	HD
	SPP1	Kerafast	ENH094-FP	.1:300	HD
	SOX9	Sigma-Aldrich	AB5535	.1:100	S
	RUNX2	Abcam	ab192256	.1:250	S
	SP7	Santa Cruz Biotechnology	sc-22536-r	.1:50	HD
	DLX3	Abcam	ab64953	.1:50	HD
	DLX5	Abcam	ab109737	.1:100	S
	HIF1A	Novus Biologicals	NB-100134	.1:50	S
	THRA1	Santa Cruz Biotechnology	sc-10819	.1:50	S
	THRB1	Santa Cruz Biotechnology	sc-10822	.1:200	HD
	IHH	Abcam	ab39634	.1:50	S
	Antigen Retrieval with
	HD = 2mg/mL Hyaluronidase (Sigma Aldrich) in PBS at 37°C for 45 minutes
	S = 10mM Sodium Citrate w/2mM EDTA and 0.05% Tween-20 (pH 6.0) at 95°C for 6 minutes
	L = 10mM Sodium Citrate w/2mM EDTA and 0.05% Tween-20 (pH 6.0) at 60°C for 72 hours
