# Supplementary material for: Differences in pathways contributing to thyroid hormone effects on postnatal cartilage calcification versus secondary ossification center development
Source: eLife. 2022 Jan 31;11:e76730. doi: 10.7554/eLife.76730 (PMC8830887; doi:10.7554/eLife.76730)
Supplement: Supplementary file 2. [file elife-76730-supp2.xlsx]

## Sheet: Sheet1
	Methods Table2.
	Real Time quantitative PCR Primers
	Gene		Primer Sequences
	Adamts4	F	CAGTGCCCGATTCATCACTGA
		R	GAGTCAGGACCGAAGGTCAG
	Adamts5	F	CGAAGAGCACTACGATGCAGC
		R	GCATGGAGGCCATCATCTTCAAT
	Acan	F	GACCAGGAAGGGAGGAGTAG
		F	CAGCCGAGAAATGACACC
	Alpl	R	ATGGTAACGGGCCTGGCTACA
		F	AGTTCTGCTCATGGACGCCGT
	Car2	F	TGATTTGATCCCGACTCGCATCT
		R	AGGCCATGTCTGCTCTTTGCATTG
	Ctnnb1	F	AGAAGTATGAGGAGCCTCTG
		R	CAGCCTCTGCATCATCATGT
	Bmp2	F	GATCTGTACCGCAGGCACTC
		R	GAAACTCGTCACTGGGGACA
	Ibsp	F	AACGGGTTTCAGCAGACAACC
		R	TAAGCTCGGTAAGTGTCGCCA
	Col1a1	F	GCCTCCCAGAACATCACCTA
		R	AGTTCCGGTGTGACTCGTG
	Col2a1	F	TGGCTTCCACTTCAGCTATG
		R	AGGTAGGCGATGCTGTTCTT
	Col10a1	F	ACGGCACGCCTACGATGT
		R	CCATGATTGCACTCCCTG
	Dlx3	F	CACCTACCACCACCAGTTCAA
		R	GCTCCTCTTTCACCGACACTG
	Dlx5	F	AGAAGAGTCCCAAGCATCCGA
		R	GCCATAAGAAGCAGAGGTAGG
	Dlx6	F	TTCCCGAGAGAGCCGAACT
		R	GTGGGTTACTACCCTGCTTCA
	Dmp1	F	TCCAGCTCAGAAAGCCAGTCC
		R	AGAACGGCTGTCCTGCTCAGA
	Hif1a	F	TGACGGCGACATGGTTTACA
		R	ACTAAACACACAGCGGAGCT
	Epas1	F	TCATTGCTGTGGTGACCCAA
		R	AGAGCAAAGACGTGTCCACC
	Ihh	F	CCCCAACTACAATCCCGACATC
		R	CGCCAGCAGTCCATACTTATTTCG
	Mgp	F	CCTGTGCTACGAATCTCACGAA
		R	TCGCAGGCCTCTCTGTTGAT
	Mmp9	F	CCATGCACTGGGCTTAGATCAT
		R	CAGATACTGGATGCCGTCTATGTC
	Mmp13	R	CATCCATCCCGTGACCTTAT
		F	TCATAACCATTCAGAGCCCA
	Bglap2	F	CTCTCTCTGCTCACTCTGCT
		R	TTTGTAGGCGGTCTTCAAGC
	Tnfrsf11b	F	TGACCTCTGTGAAAGCAGCGTG
		R	GCCCTTCAAGGTGTCTTGGTCA
	Spp1	F	TACAGTCGATGTCCCCAACG
		R	TGATCAGAGGGCATGCTCAG
	Sp7	F	TCCTCTCTGCTTGAGGAAGAAG
		R	GAGTCCATTGGTGCTTGAGAAG
	Tnfsf11	F	GACTCCTGCAGGAGGATGAA
		R	GTCCTCTTGGTACCACGATC
	Runx2	F	AAAGCCAGAGTGGACCCTTCCA
		R	ATAGCGTGCTGCCATTCGAGGT
	Shh	F	GCCTACAAGCAGTTTATTCCCA
		R	GTGAGTTCCTTAAATCGTTCGG
	Sox9	F	CGGAGGAAGTCGGTGAAGA
		R	GTCGGTTTTGGGAGTGGTG
	Tgfa	F	AGCGCTGGGTATCCTGTTAG
		R	CAAAAACCGGCAGGTTCCAT
	Acp5	R	CACTCAGCTGTCCTGGCTCAA
		F	CTGCAGGTTGTGGTCATGTCC
	Vegfa	F	ATATCAGGCTTTCTGGATTAAGGAC
		R	CAGACGAAAGAAAGACAGAACAAAG
